# Supplementary material
Source: ML conference proceedings conference paper supplement (https://openreview.net/forum?id=cvAZKWA1HZ)
Supplement: supplementary_material [file academic_tasks_academic_V71_114.pdf › supplementary_materials/trajectory_evaluation/academic_tasks_academic_V71_114.pdf]

# Task Report

**Session ID:** academic\_tasks\_academic\_V71\_114

**Task Description:** Identify the contact information for the OSU Health Plan dedicated support team

**Total Rounds:** 5

**Step 1** (2025-10-07T11:03:06.882525)

## Screenshots:

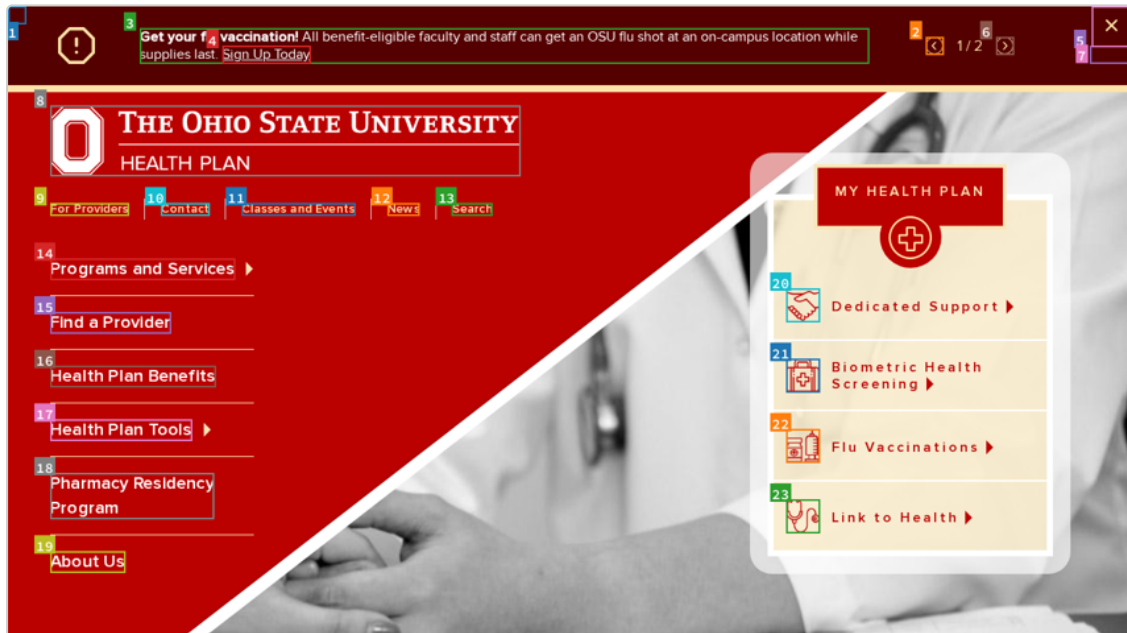

## Response:

To find the contact information for the OSU Health Plan dedicated support team, I should start by clicking on the "Dedicated Support" link in the pop-

up box on the right side of the page. This link is likely to lead to a page with more details, including contact information.

**\*\*Reasoning:\*\*** The "Dedicated Support" link is prominently displayed in the pop-up box, suggesting it is a key resource for users seeking assistance. Clicking this link is a logical first step to access the relevant contact information.

```
``json
{
  "name": "click",
  "arguments": {
    "element_id": "20",
    "description": "Dedicated Support link",
    "reasoning": "Clicking this link will likely lead to a page with contact information for dedicated support."
  }
}
...
```

**Step 2 (2025-10-07T11:03:27.561754)**

## Screenshots:

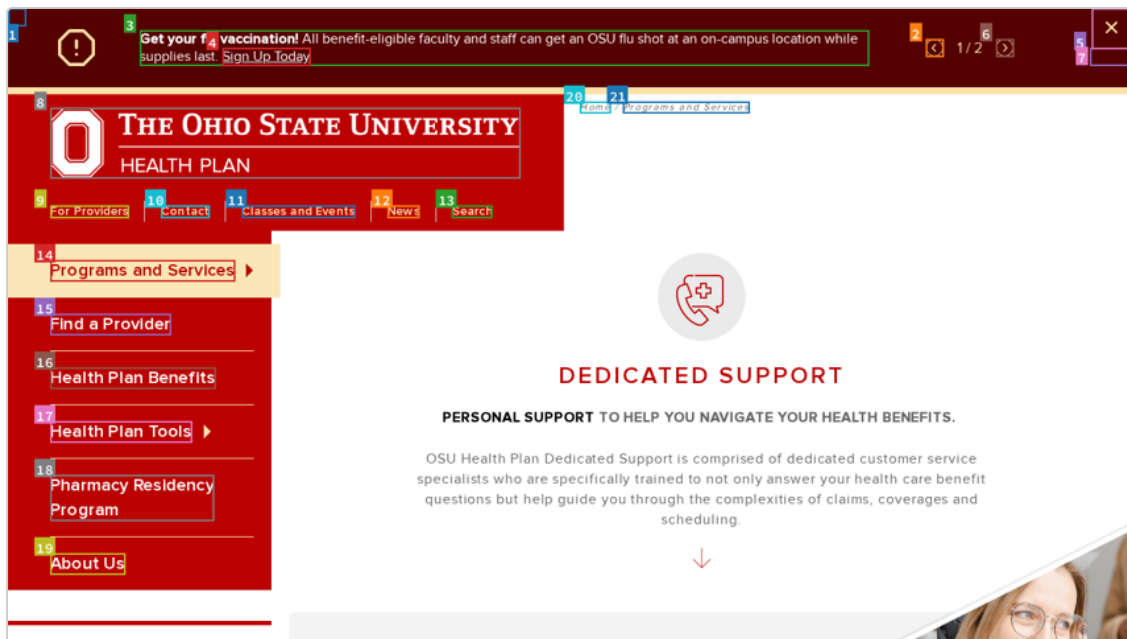

## Response:

To find the contact information for the OSU Health Plan dedicated support team, I should explore the "Contact" link in the navigation menu, as it is likely to lead to the relevant contact details.

**\*\*Reasoning:\*\*** The "Contact" link in the navigation menu is a logical starting point to find contact information for the dedicated support team.

```
```json
{
  "name": "click",
  "arguments": {
    "element_id": "10",
    "description": "Contact link in the navigation menu",
    "reasoning": "Clicking the 'Contact' link will likely lead to the contact information for the dedicated support team."
  }
}
```

```
}  
...
```

### Step 3 (2025-10-07T11:03:44.814512)

#### Screenshots:

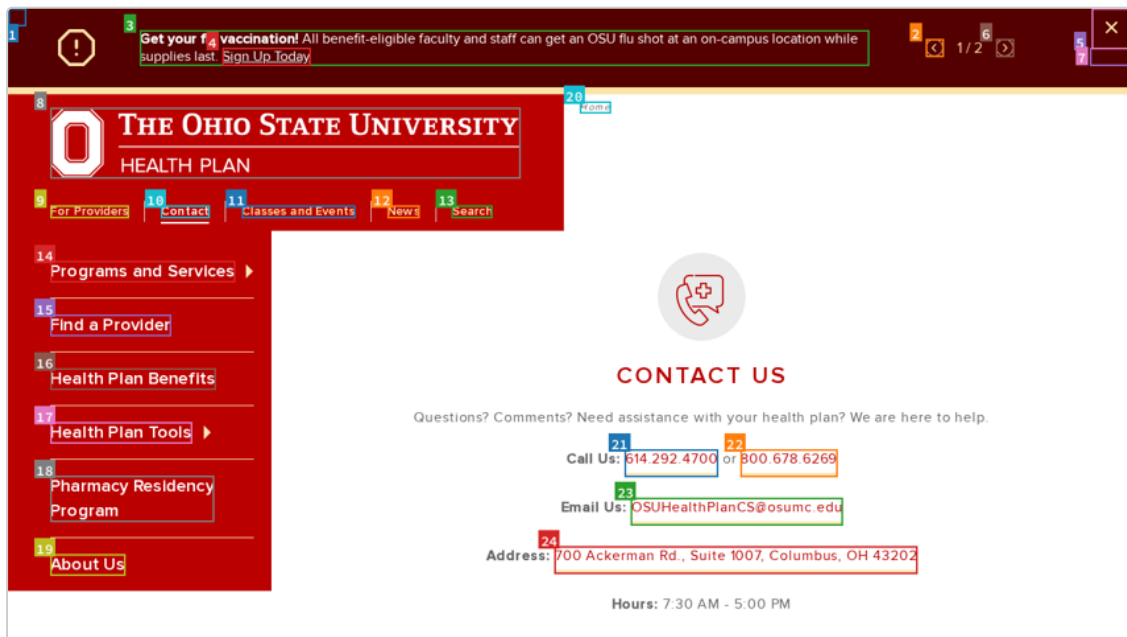

#### Response:

```
```json  
{  
  "name": "click",  
  "arguments": {  
    "element_id": "21",  
    "description": "Local phone number for contact",  
    "reasoning": "The local phone number is highlighted in blue and is part  
of the contact information needed."  
  }  
}
```

```
}  
...
```

## Step 4 (2025-10-07T11:03:56.603230)

### Screenshots:



### Response:

To identify the contact information for the OSU Health Plan dedicated support team, I will focus on the contact details provided on the page. The phone numbers and email address are clearly listed under the "CONTACT US" section.

**\*\*Action:\*\***

```json

```
{  
  "name": "click",  
  "arguments": {  
    "element_id": "21",
```

"description": "Phone number 614.292.4700",  
"reasoning": "This is one of the contact phone numbers provided for the OSU Health Plan."  
}  
}  
...

## Step 5 (2025-10-07T11:04:14.229846)

### Screenshots:

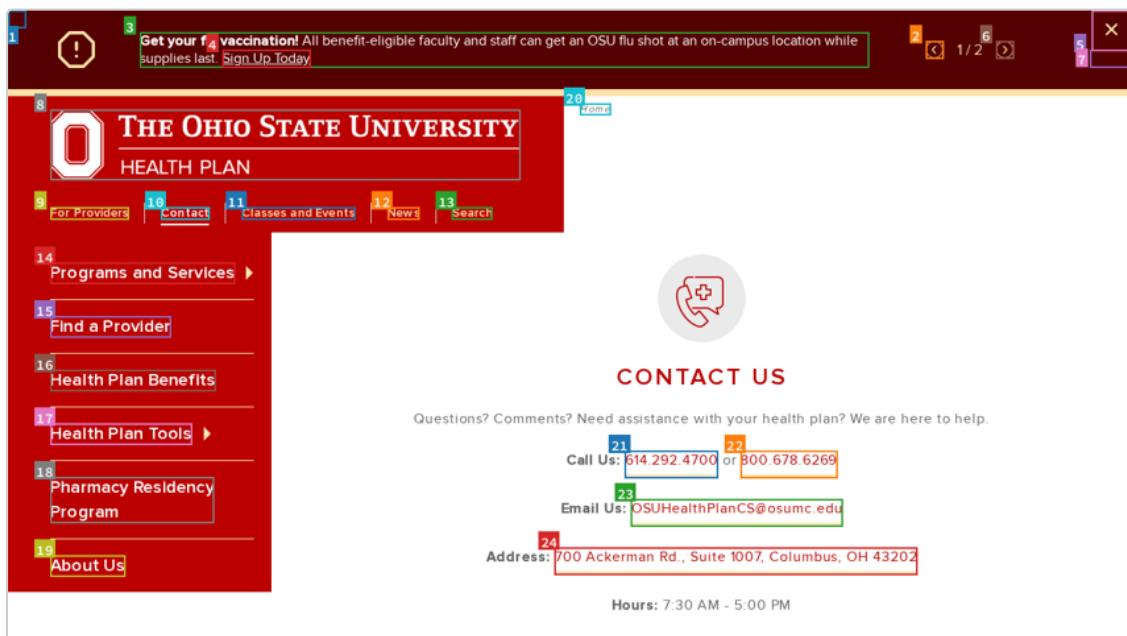

### Response:

Thought: The contact information for the OSU Health Plan dedicated support team is already visible on the page. I can see the phone numbers, email address, and physical address. No further actions are needed to find this information.

Action:

```json

```
{  
  "name": "stop",  
  "arguments": {  
    "answer": "The contact information for the OSU Health Plan dedicated  
support team is as follows:\n- Phone: 614.292.4700 or 800.678.6269\n-  
Email: OSUHealthPlanCS@osumc.edu\n- Address: 700 Ackerman Rd.,  
Suite 1007, Columbus, OH 43202\n- Hours: 7:30 AM - 5:00 PM",  
    "reasoning": "The required contact information is clearly displayed on  
the page, so no further actions are necessary."  
  }  
}  
'''
```
