# Supplementary material
Source: ML conference proceedings conference paper supplement (https://openreview.net/forum?id=cvAZKWA1HZ)
Supplement: supplementary_material [file academic_tasks_academic_V91_540.pdf › supplementary_materials/trajectory_evaluation/academic_tasks_academic_V91_540.pdf]

# Task Report

Session ID: academic\_tasks\_academic\_V91\_540

Task Description: Search for student accommodations in London

Total Rounds: 10

Step 1 (2025-10-14T03:56:10.480926)

## Screenshots:

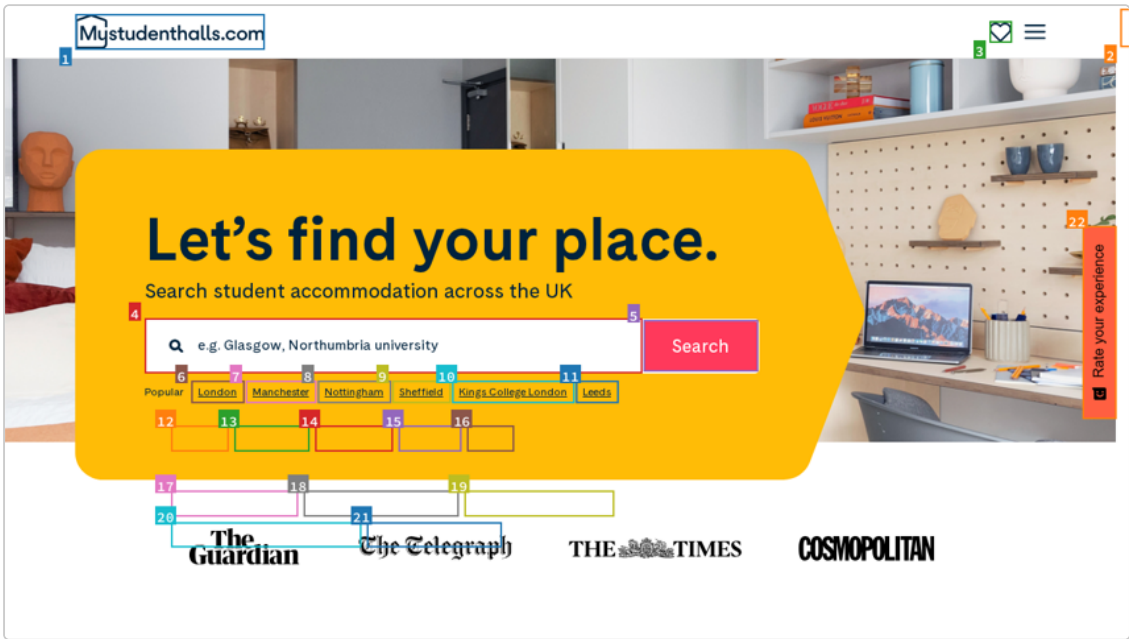

## Response:

```
```json
{
  "name": "click",
```

```

"arguments": {
  "element_id": "7",
  "description": "London (Popular city link)",
  "reasoning": "Clicking on the 'London' link will directly search for
student accommodations in London without needing to type anything in
the search bar."
}
}
...

```

## Step 2 (2025-10-14T03:56:21.920555)

### Screenshots:

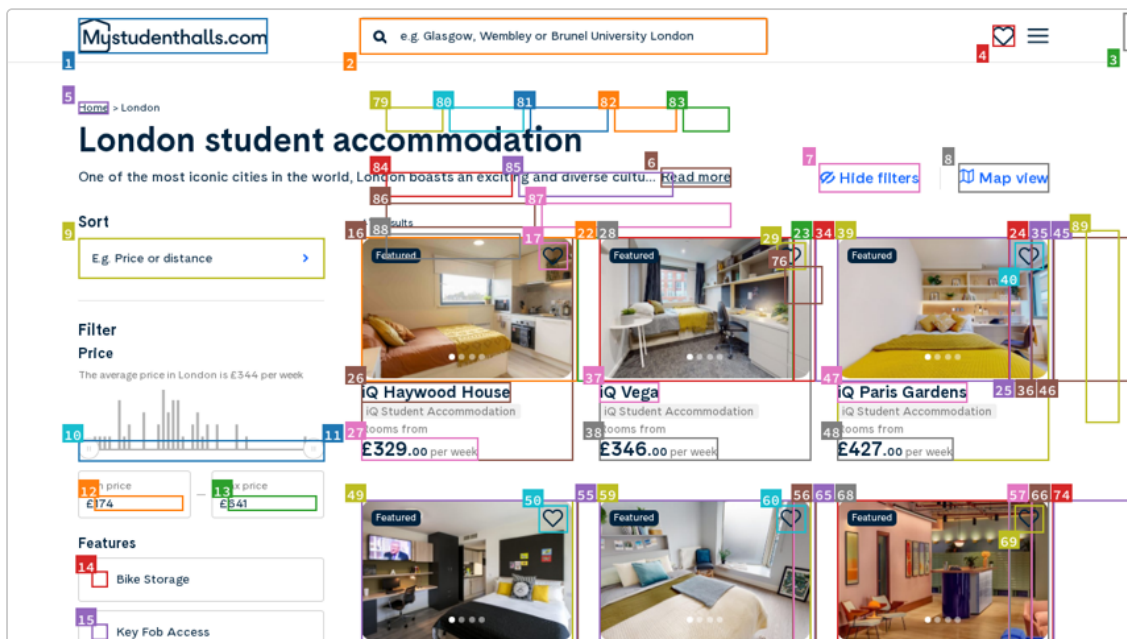

### Response:

To search for student accommodations in London, I need to ensure that the search term is correctly entered and that the results are visible. Since the search bar already contains the term "London," I will proceed to view the results.

Action: {"name": "click", "arguments": {"element\_id": "8", "description": "Map view button", "reasoning": "I need to switch to map view to get a better overview of the accommodations in London"}}

### Step 3 (2025-10-14T03:56:35.375081)

#### Screenshots:

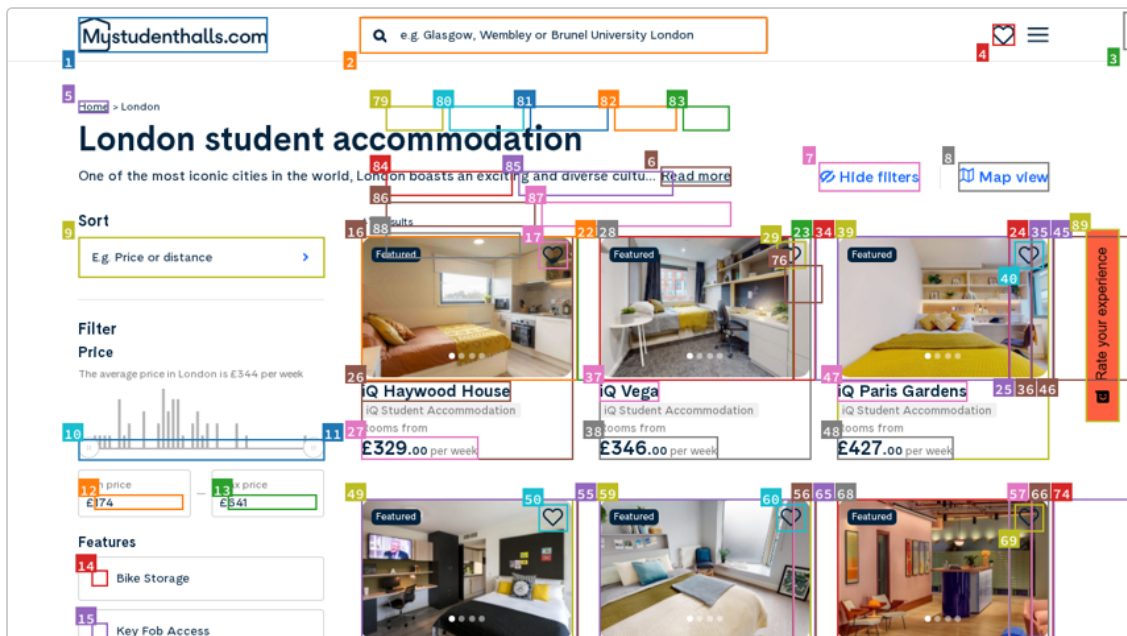

#### Response:

To proceed with finding student accommodations in London, I will start by interacting with the search bar to ensure the search is set for London. Then, I will explore the listings and filters to refine the search if necessary.

**\*\*Action:\*\***

**```json**

```
{
  "name": "click",
  "arguments": {
```

```

"element_id": "2",
"description": "search bar",
"reasoning": "I need to ensure the search is set for London
accommodations."
}
}
...

```

## Step 4 (2025-10-14T03:56:45.931791)

### Screenshots:

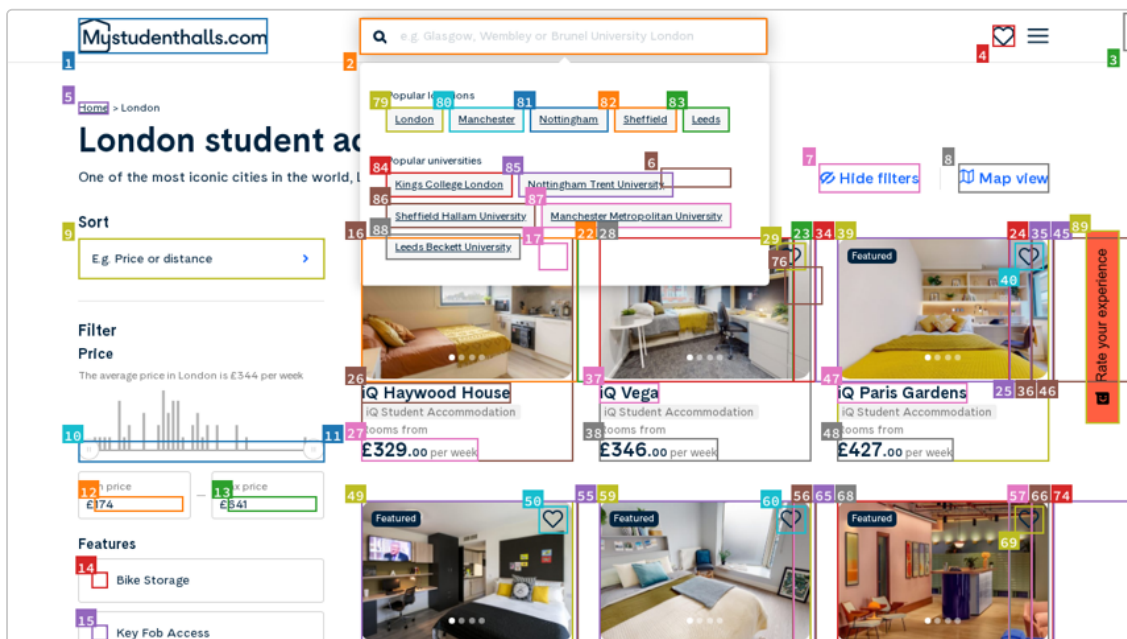

### Response:

To search for student accommodations in London, I need to ensure that the location is set to London. The dropdown menu already shows London as a selected option, which is good. Now, I should proceed to explore the listings or adjust filters if needed.

**\*\* Action:\*\***

```

```json
{
  "name": "click",
  "arguments": {
    "element_id": "80",
    "description": "London (selected location)",
    "reasoning": "Click to confirm or explore accommodations in London"
  }
}
```

```

## Step 5 (2025-10-14T03:56:56.040921)

### Screenshots:

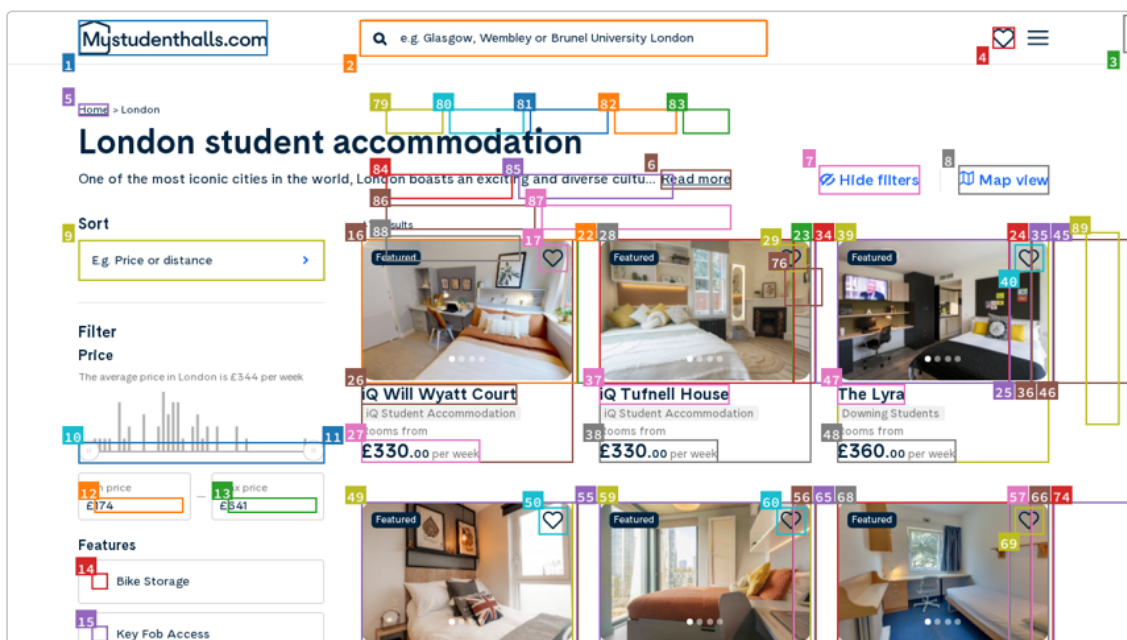

### Response:

To search for student accommodations in London, I will use the search bar at the top of the page. Since the search term "London" is already present, I will proceed to execute the search.

Action:

```
```json
```

```
{
```

```
  "name": "click",
```

```
  "arguments": {
```

```
    "element_id": "2",
```

```
    "description": "search button or first search result",
```

```
    "reasoning": "I need to click the search button or first result to proceed  
with the search for London accommodations."
```

```
  }
```

```
}
```

```
```
```

## Step 6 (2025-10-14T03:57:11.088600)

### Screenshots:

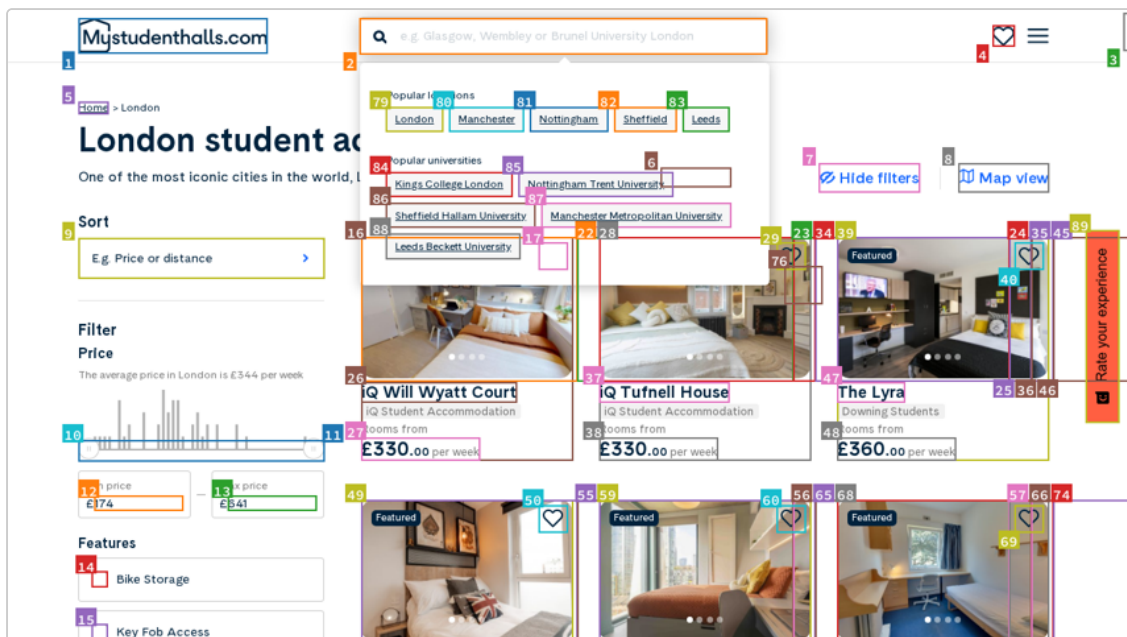

## Response:

To search for student accommodations in London, I will use the search bar at the top of the page. Since the search bar already has a placeholder text suggesting London as a location, I will type "London" into the search bar to initiate the search.

**\*\*Action:\*\***

```
```json
```

```
{  
  "name": "type",  
  "arguments": {  
    "text": "London",  
    "element_id": "2",  
    "field_description": "search input field",  
    "reasoning": "I need to search for student accommodations in London"  
  }  
}  
```
```

**Step 7 (2025-10-14T03:57:26.378594)**

## Screenshots:

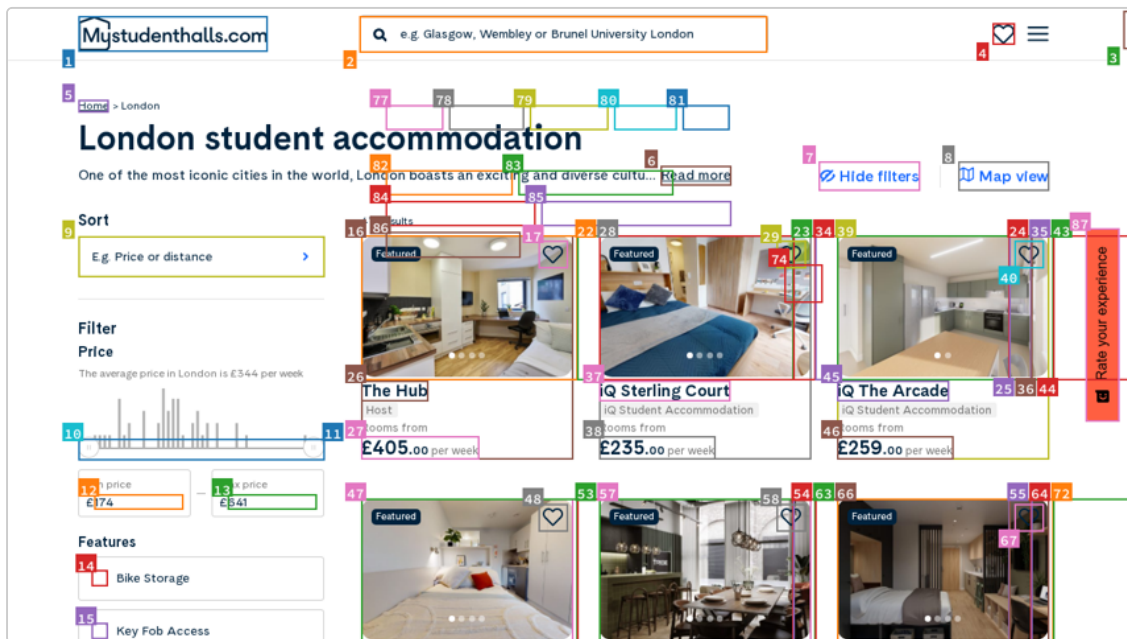

## Response:

To search for student accommodations in London, I will use the search bar at the top of the page. Since the search term "London" is already present, I will proceed to execute the search.

Action:

```
```json
```

```
{
  "name": "click",
  "arguments": {
    "element_id": "4",
    "description": "Search button next to the search bar",
    "reasoning": "I need to execute the search for student accommodations in London"
  }
}
```



## Screenshots:

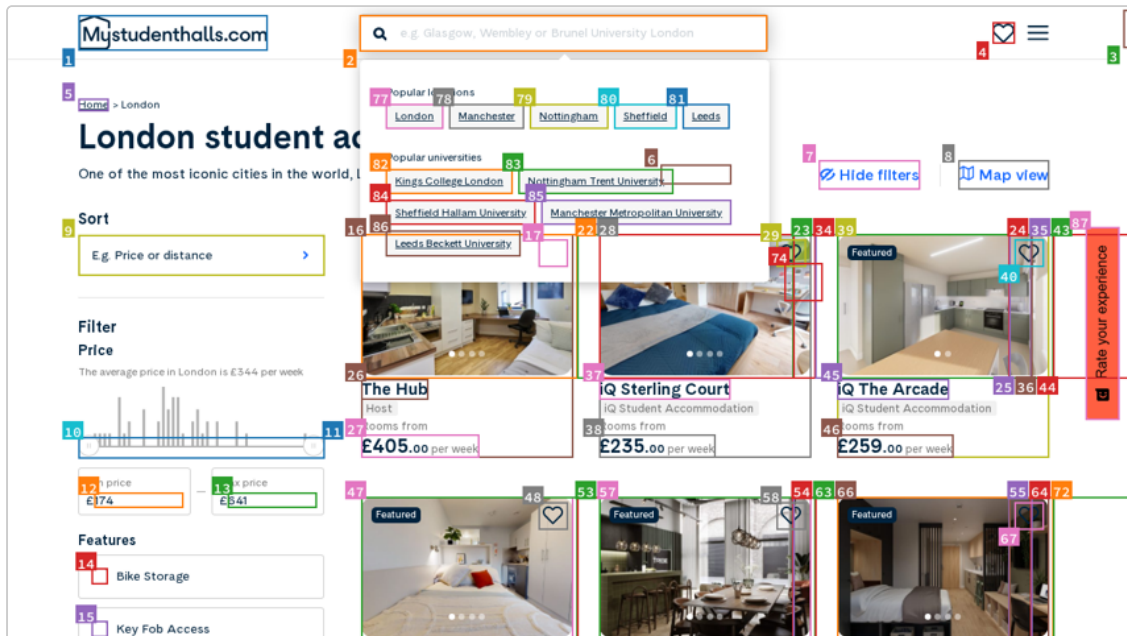

## Response:

To search for student accommodations in London, I need to ensure the search term is correctly entered and then proceed to view the results. Since the search term "London" is already present in the search bar, I should focus on confirming the search or exploring the results.

**\*\*Reasoning:\*\*** The search term is already set to "London," so I should proceed to view the results or refine them using filters if necessary. Since the goal is to find accommodations, I will click on the search button to ensure the search is applied and results are displayed.

**\*\*Action:\*\*** Click the search button to confirm the search for accommodations in London.

```
```json
{
```

```

"name": "click",
"arguments": {
  "element_id": "4",
  "description": "search button",
  "reasoning": "I need to confirm the search for accommodations in
London"
}
}
...

```

## Step 9 (2025-10-14T03:57:54.134533)

### Screenshots:

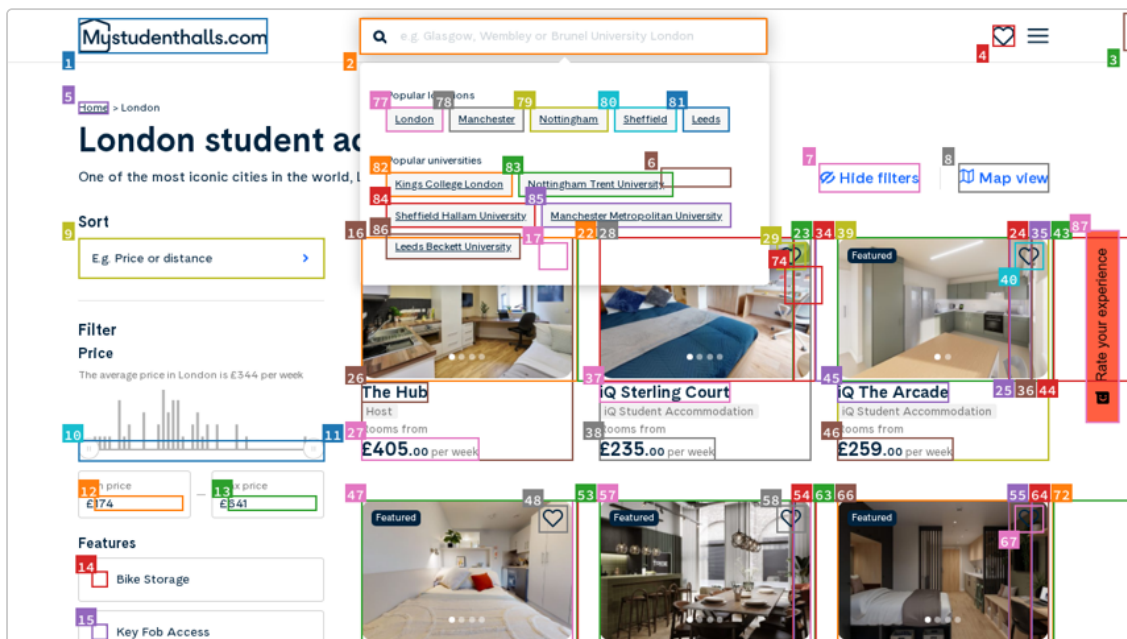

### Response:

To search for student accommodations in London, I need to ensure the search term is correctly entered and then proceed to view the results. Since the search bar already has "London" as a popular location, I can directly click on it to filter the results for London accommodations.

**\*\*Reasoning:\*\*** The search term "London" is already highlighted as a popular location, so clicking on it will filter the results to show accommodations in London. This aligns with the task of finding student accommodations in London.

```
```json
{
  "name": "click",
  "arguments": {
    "element_id": "77",
    "description": "London (popular location)",
    "reasoning": "Clicking on 'London' will filter the search results for accommodations in London."
  }
}
```
```

**Step 10** (2025-10-14T03:58:07.736418)

## Screenshots:

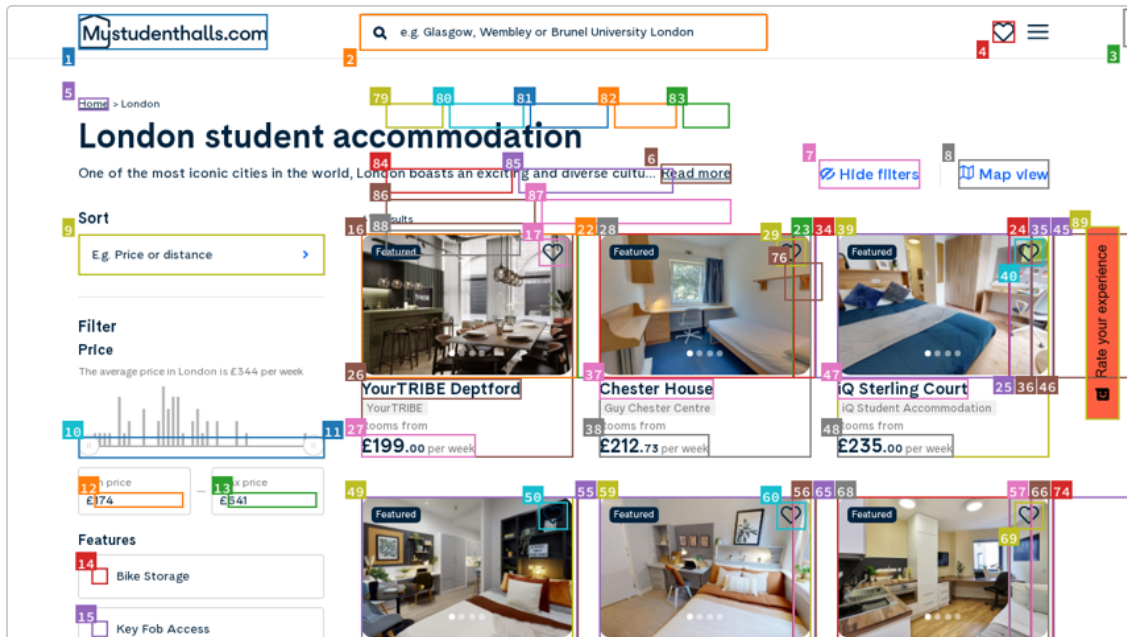

## Response:

```
```json
{
  "name": "stop",
  "arguments": {
    "answer": "The search for student accommodations in London has been completed. The page displays several featured listings, including YourTRIBE Deptford (£199.00 per week), Chester House (£212.73 per week), and iQ Sterling Court (£235.00 per week). Users can further refine their search using filters and sorting options, and interact with the listings by saving favorites or viewing more details.",
    "reasoning": "The task of searching for student accommodations in London has been successfully completed as the page already shows relevant results. No further actions are required to achieve the goal."
  }
}
```
