# Supplementary material
Source: ML conference proceedings conference paper supplement (https://openreview.net/forum?id=cvAZKWA1HZ)
Supplement: supplementary_material [file education_tasks_education_123.pdf › supplementary_materials/trajectory_evaluation/education_tasks_education_123.pdf]

# Task Report

**Session ID:** education\_tasks\_education\_123

**Task Description:** Identify any recurring themes or patterns in the dog names presented.

**Total Rounds:** 5

**Step 1** (2025-09-15T02:50:29.447570)

## Screenshots:

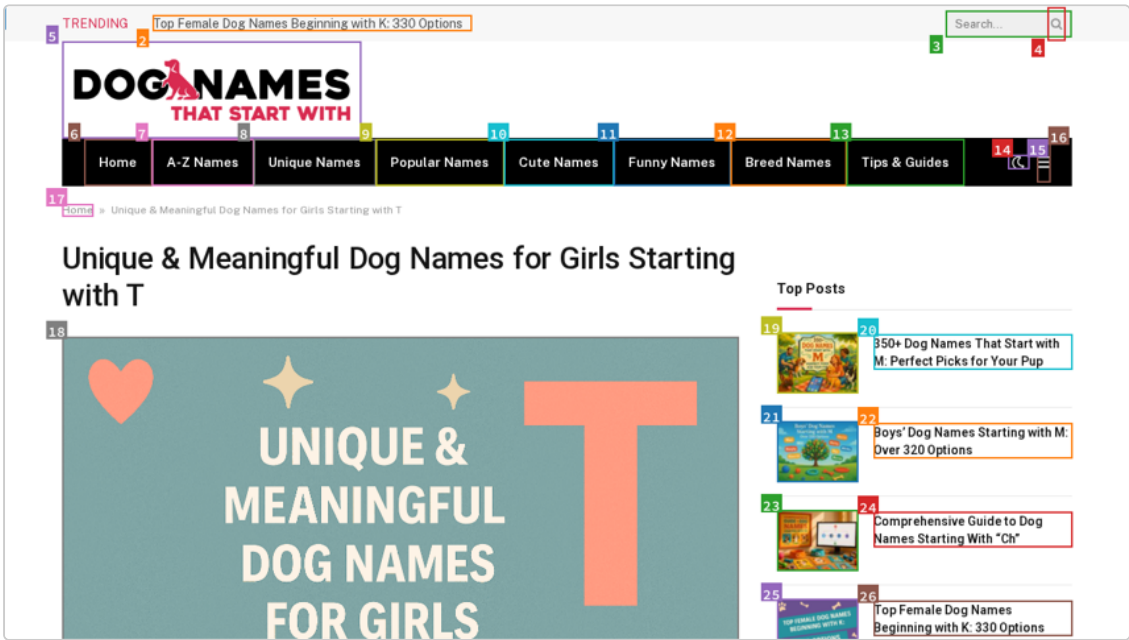

## Response:

To identify recurring themes or patterns in the dog names presented, I need to explore the content below the header and image. Since the visible

portion of the page does not show the actual list of names, I'll scroll down to reveal more content.

Action:

```
```json
{
  "name": "scroll",
  "arguments": {
    "direction": "down",
    "reasoning": "Scrolling is necessary to view the list of dog names and identify any recurring themes or patterns."
  }
}
```
```

**Step 2 (2025-09-15T02:50:40.445355)**

**Screenshots:**

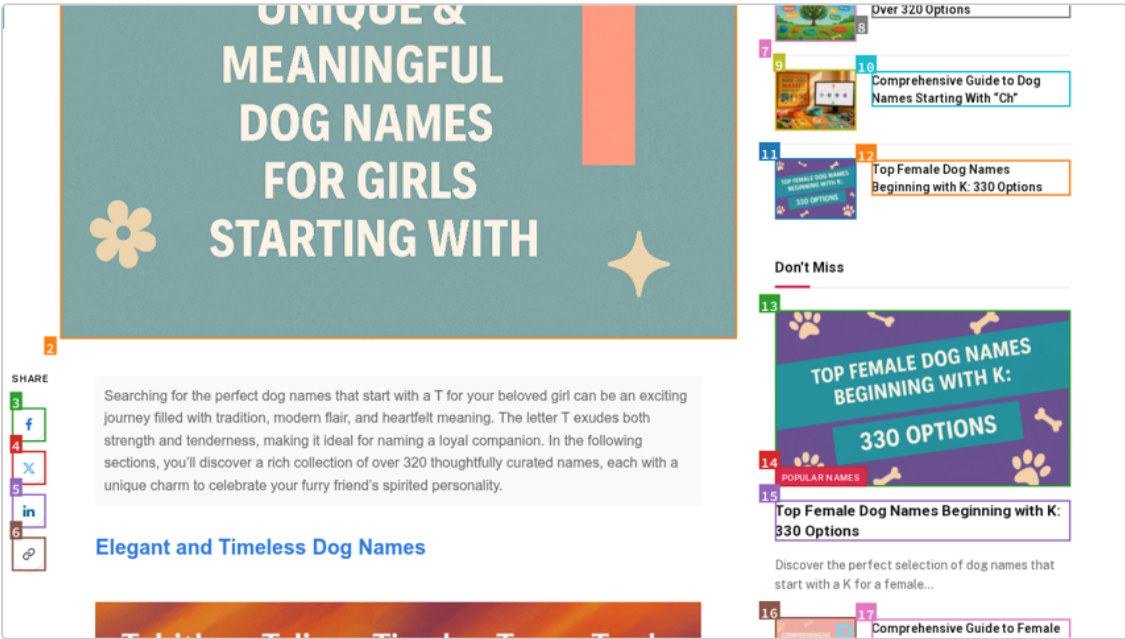

## Response:

To identify recurring themes or patterns in the dog names presented, I need to explore the content further. Since the main content area mentions "Elegant and Timeless Dog Names," I'll start by scrolling to reveal more of the list or categories.

Action:

```
```json
{
  "name": "scroll",
  "arguments": {
    "direction": "down",
    "reasoning": "To uncover more dog names and potential themes or
patterns"
  }
}
```
```

**Step 3** (2025-09-15T02:50:50.127474)

Screenshots:

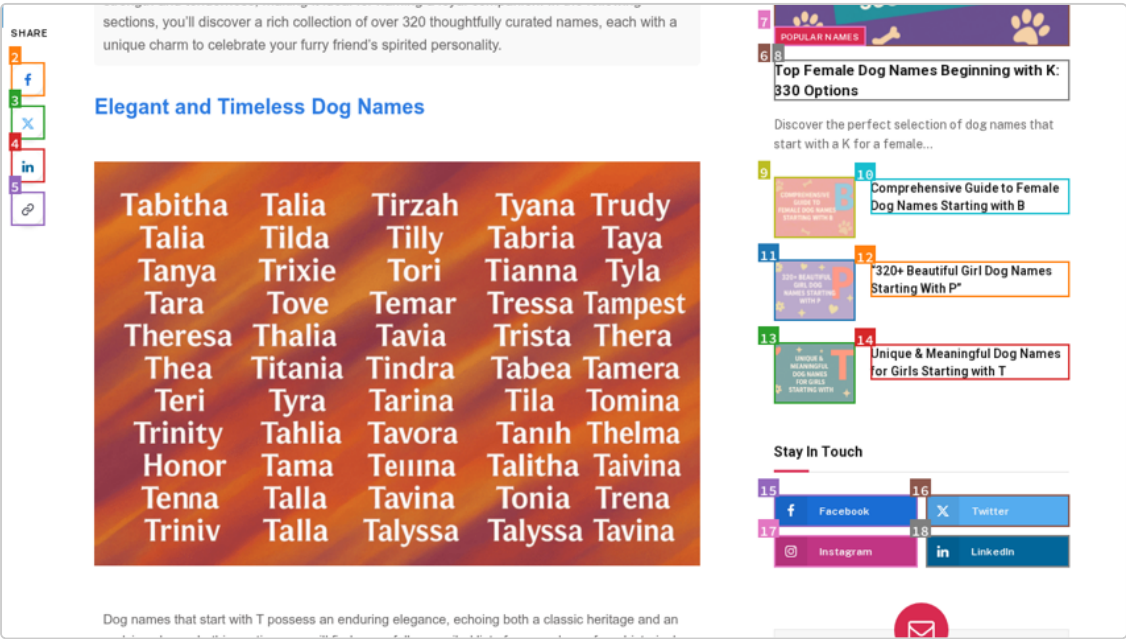

Response:

Thought: To identify recurring themes or patterns in the dog names, I'll analyze the list provided in the image. The names seem to follow certain linguistic and cultural trends, such as classical, mythological, or literary inspirations. I'll look for common characteristics like syllable structure, origin, or thematic consistency.

Action: `{{"name": "content_analyzer", "arguments": {"query": "Recurring themes or patterns in dog names", "reasoning": "Analyzing the list of names to detect any consistent patterns or themes."}}}`

## Screenshots:

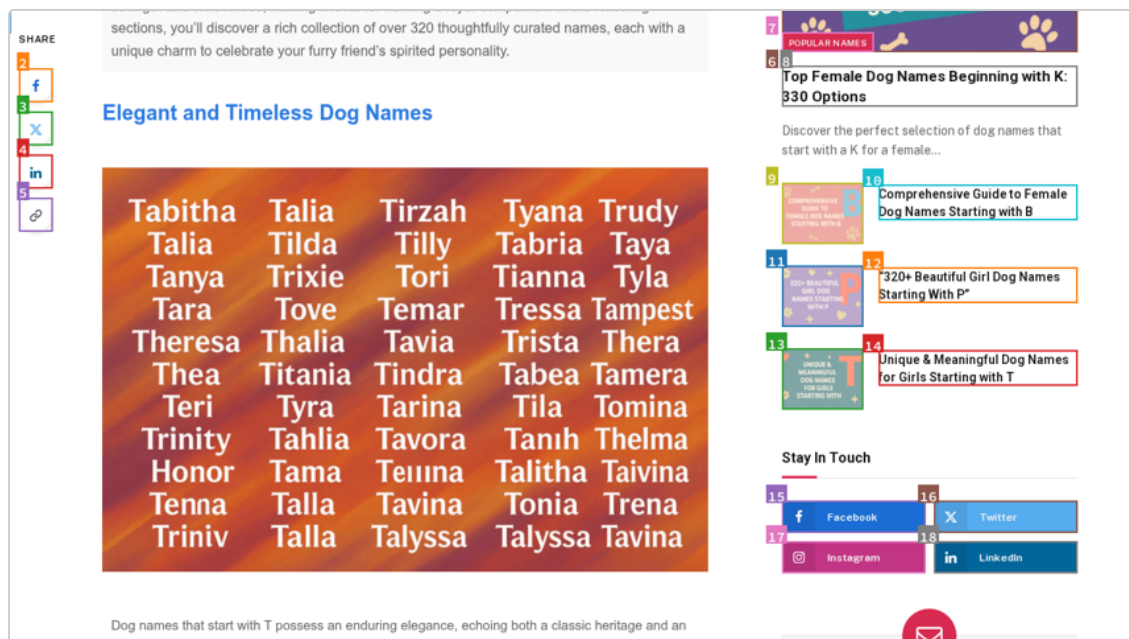

## Response:

To identify recurring themes or patterns in the dog names presented, let's analyze the provided list:

### ### Step-by-Step Analysis:

#### 1. \*\*Visual Inspection of Names\*\*:

- The names listed include: Tabitha, Talia, Tirzah, Tyana, Trudy, Taya, Tilly, Tavina, Tanya, Trixie, Tori, Tianna, Tyla, Tara, Tove, Temar, Tressa, Tampest, Theresa, Thalia, Tavia, Trista, Thera, Thea, Titania, Tindra, Tabea, Tamera, Teri, Tyra, Tarina, Tila, Tomina, Trinity, Tahlia, Tavora, Tanih, Thelma, Honor, Tama, Teiina, Talitha, Taivina, Tenna, Talla, Tavina, Tonia, Trena, Triniv, Tallya, Talyssa, Talyssa, Tavina.

#### 2. \*\*Observing Patterns\*\*:

- \*\*Prefixes and Suffixes\*\*: Many names share common prefixes or suffixes, such as "-a" (e.g., Talia, Tavia, Tava), "-na" (e.g., Tanya, Tarna), "-ra" (e.g., Trudy, Tavina).

- \*\*Cultural Influence\*\*: Some names seem to draw from various

cultures, such as Hebrew (e.g., Tabitha, Tirzah), Greek (e.g., Thea, Thelma), or Latin (e.g., Tresa, Tressa).

- **Elegance and Timelessness**: As mentioned in the text, names like Tabitha, Talia, and Tessa are highlighted for their elegance and antique charm.

- **Meaningful Names**: Names like Tabitha (joyful spirit), Tavina (little princess), and Timurah (brave heart) suggest a focus on meaningful origins.

### 3. **Recurring Themes**:

- **Classical Heritage**: Many names have roots in classical languages or traditions, giving them an air of sophistication and timelessness.

- **Feminine and Elegant**: The names predominantly lean toward feminine and elegant connotations, aligning with the theme of "Elegant and Timeless Dog Names."

- **Unique and Playful**

## Step 5 (2025-09-15T02:51:40.580536)

### Screenshots:

The screenshot displays a webpage titled "Elegant and Timeless Dog Names". On the left, there is a "SHARE" section with icons for Facebook, X, LinkedIn, and a link icon. The main content area features a grid of dog names starting with 'T':

|         |         |         |         |         |
|---------|---------|---------|---------|---------|
| Tabitha | Talia   | Tirzah  | Tyana   | Trudy   |
| Talia   | Tilda   | Tilly   | Tabria  | Taya    |
| Tanya   | Trixie  | Tori    | Tianna  | Tyla    |
| Tara    | Tove    | Temar   | Tressa  | Tampest |
| Theresa | Thalia  | Tavia   | Trista  | Thera   |
| Thea    | Titania | Tindra  | Tabea   | Tamera  |
| Teri    | Tyra    | Tarina  | Tila    | Tomina  |
| Trinity | Tahlia  | Tavora  | Tanih   | Thelma  |
| Honor   | Tama    | Temina  | Talitha | Taivina |
| Tenna   | Talla   | Tavina  | Tonia   | Trena   |
| Triniv  | Talla   | Talyssa | Talyssa | Tavina  |

Below the grid, a partial sentence reads: "Dog names that start with T possess an enduring elegance, echoing both a classic heritage and an".

On the right side of the page, there is a "POPULAR NAMES" section with a list of links:

- 7. POPULAR NAMES
- 6. 8. Top Female Dog Names Beginning with K: 330 Options
- Discover the perfect selection of dog names that start with a K for a female...
- 9. Comprehensive Guide to Female Dog Names Starting with B
- 10. Comprehensive Guide to Female Dog Names Starting with B
- 11. 320+ Beautiful Girl Dog Names Starting With P
- 12. 320+ Beautiful Girl Dog Names Starting With P
- 13. Unique & Meaningful Dog Names for Girls Starting with T
- 14. Unique & Meaningful Dog Names for Girls Starting with T

At the bottom right, there is a "Stay In Touch" section with social media links:

- 15. Facebook
- 16. Twitter
- 17. Instagram
- 18. LinkedIn

## Response:

To identify recurring themes or patterns in the dog names presented, let's analyze the provided list:

### ### Observations:

#### 1. **Classical and Literary Influence**:

- Many names seem to draw inspiration from classical literature, mythology, or historical contexts. For example, "Tabitha," "Tess," and "Thelma" have roots in traditional or literary sources.

#### 2. **Variety in Length**:

- The names vary significantly in length, ranging from short names like "Tara" and "Tina" to longer names like "Talyssa" and "Tamera."

#### 3. **Cultural and International Flavors**:

- Some names appear to have international or multicultural origins. For instance, "Tirina" and "Tarmona" might suggest influences from non-English-speaking cultures.

#### 4. **Sound Patterns**:

- Many names share similar phonetic structures, such as ending with "-a" (e.g., "Talia," "Tavia," "Talya") or having a soft, melodic sound.

#### 5. **Meaningful and Descriptive Names**:

- Several names carry specific meanings, such as "Tabitha" (joyful spirit), "Tavina" (little princess), and "Timurah" (brave heart).

### ### Analysis:

Given the provided list and the summary of the page, we can infer the following recurring themes and patterns:

- **Elegance and Timelessness**: The names are designed to be elegant and timeless, reflecting classic charm and a vivacious spirit.
- **Meaningful and Unique**: Many names have distinct meanings, adding a personal touch to the dog's identity.
- **Modern and Trendy**: Some names are inventive and youthful, blending tradition with contemporary appeal.

- **Whimsical and Cultural Richness**: Certain names incorporate whimsy and cultural diversity, showcasing playful inventiveness.

### ### Conclusion:

The recurring themes in the dog names presented include elegance, timelessness, meaningfulness, modernity, and cultural richness. These names aim to resonate with both the dog's personality and the owner's values, offering a diverse selection that caters to various preferences.

```
```json
```

```
{
```

```
  "name": "stop",
```

```
  "arguments": {
```

```
    "answer": "Recurring themes in the dog names include elegance,  
timelessness, meaningfulness, modernity, and cultural richness. These  
names are designed to reflect classic charm,
```
