# Supplementary material
Source: ML conference proceedings conference paper supplement (https://openreview.net/forum?id=cvAZKWA1HZ)
Supplement: supplementary_material [file education_tasks_education_4962.pdf › supplementary_materials/trajectory_evaluation/education_tasks_education_4962.pdf]

# Task Report

**Session ID:** education\_tasks\_education\_4962

**Task Description:** Find a bootcamp focused on data science.

**Total Rounds:** 14

Step 1 (2025-09-18T11:31:34.699631)

## Screenshots:

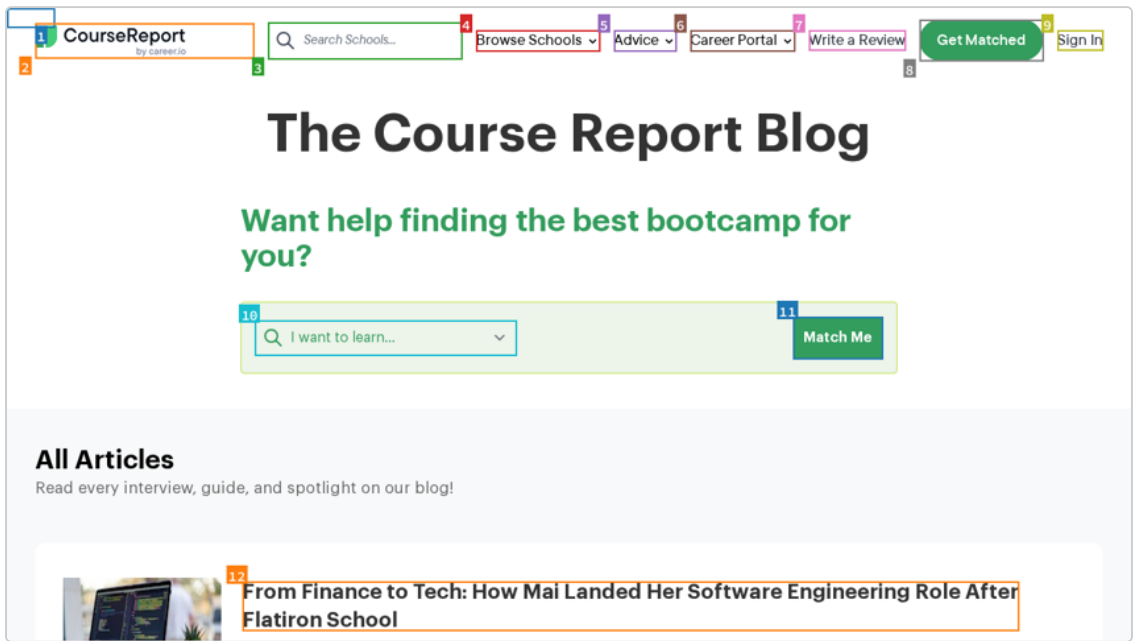

## Response:

```
```json
{
  "name": "click",
```

```
"arguments": {
  "element_id": "10",
  "description": "dropdown menu labeled 'I want to learn...'",
  "reasoning": "To find a bootcamp focused on data science, I need to
select the relevant category from the dropdown menu."
}
}
...
```

## Step 2 (2025-09-18T11:31:45.110020)

### Screenshots:

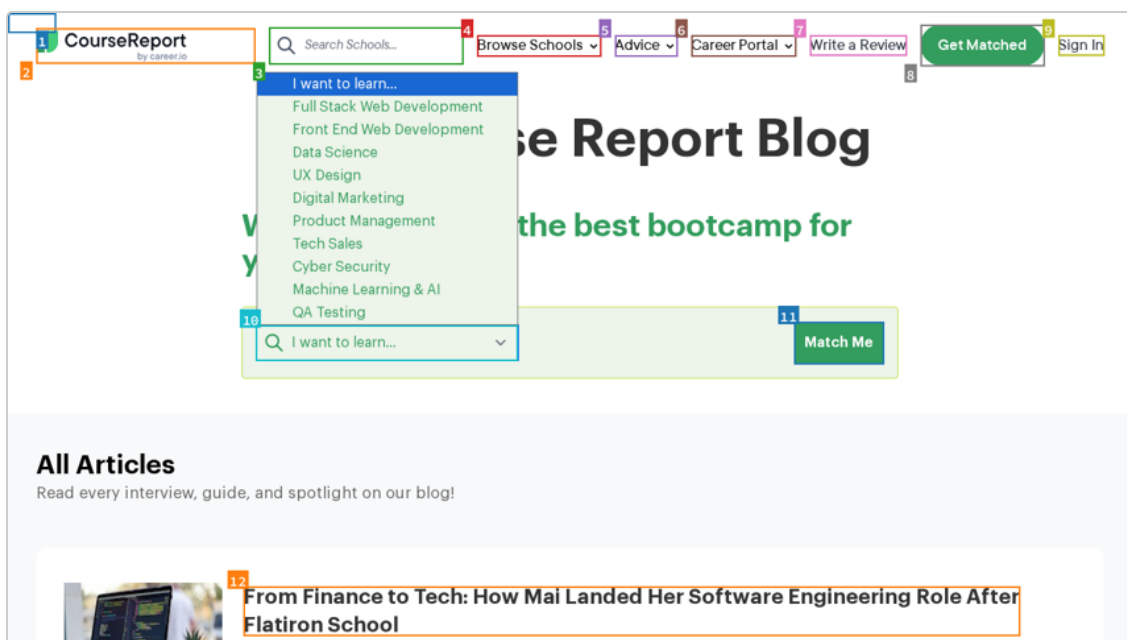

### Response:

To find a bootcamp focused on data science, I'll start by interacting with the dropdown menu labeled "I want to learn..." where data science is listed as an option.

Action:

```
```json
{
  "name": "click",
  "arguments": {
    "element_id": "10",
    "description": "dropdown menu 'I want to learn...' to select Data
Science",
    "reasoning": "I need to choose Data Science from the list to find
relevant bootcamps"
  }
}
}```
```

### Step 3 (2025-09-18T11:31:53.929247)

#### Screenshots:

The screenshot shows the CourseReport Blog homepage. The header includes the CourseReport logo (1), a search bar (2) with the text 'Search Schools...' (3), and navigation links: 'Browse Schools' (4), 'Advice' (5), 'Career Portal' (6), 'Write a Review' (7), 'Get Matched' (8), and 'Sign In' (9). The main heading is 'The Course Report Blog'. Below it is a green call-to-action: 'Want help finding the best bootcamp for you?'. This is followed by a search bar (10) with the text 'I want to learn...' (11) and a 'Match Me' button (12). The 'All Articles' section is visible at the bottom, with a subheading 'Read every interview, guide, and spotlight on our blog!'. A featured article is shown with a thumbnail image (13) and the title 'From Finance to Tech: How Mai Landed Her Software Engineering Role After Flatiron School' (14).

## Response:

```
```json
{
  "name": "click",
  "arguments": {
    "element_id": "10",
    "description": "dropdown menu labeled 'I want to learn...' to select a learning topic",
    "reasoning": "To find a bootcamp focused on data science, I need to interact with the dropdown menu to specify my interest in data science."
  }
}
```
```

## Step 4 (2025-09-18T11:32:04.636039)

## Screenshots:

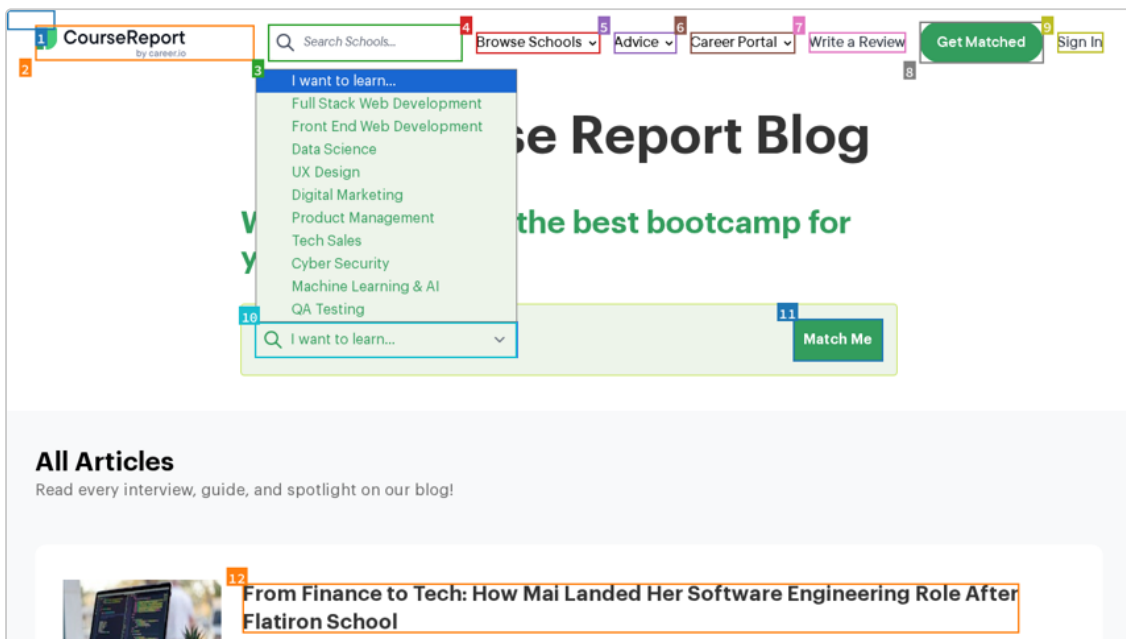

## Response:

To find a bootcamp focused on data science, I'll start by interacting with the dropdown menu that lists various career paths. Since "Data Science" is already visible in the dropdown, I can select it directly.

Action:

```
```json
```

```
{  
  "name": "click",  
  "arguments": {  
    "element_id": "3",  
    "coords": "434 159",  
    "description": "Data Science option in the dropdown menu",  
    "reasoning": "Selecting 'Data Science' will likely show relevant  
bootcamp options"  
  }  
}
```

```
```
```

**Step 5 (2025-09-18T11:32:14.056424)**

## Screenshots:

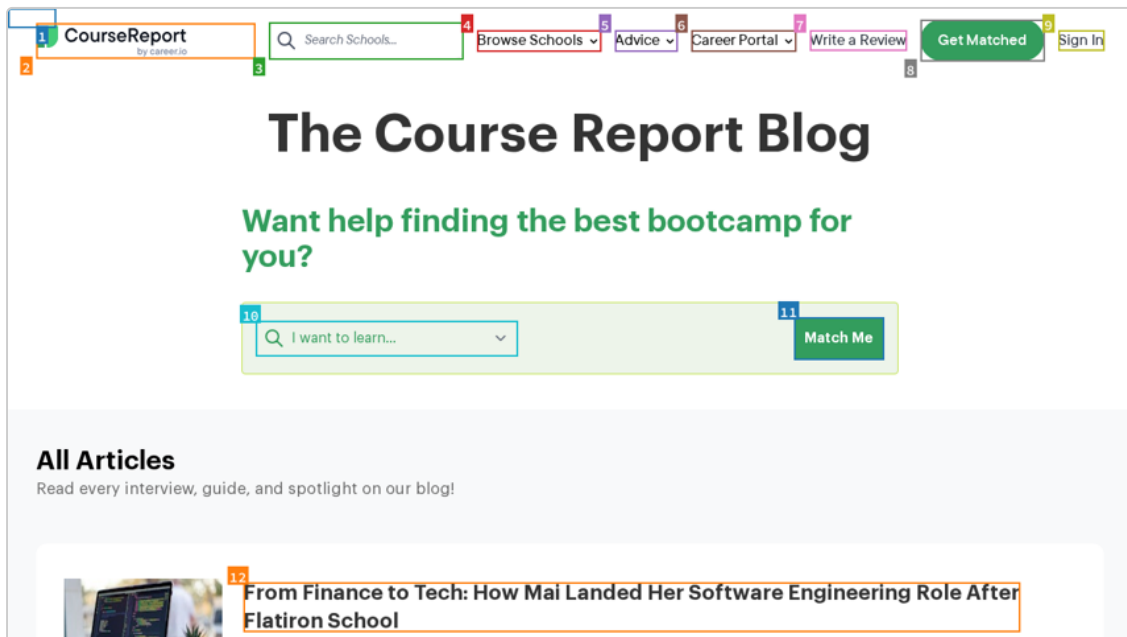

## Response:

To find a bootcamp focused on data science, I'll start by using the search functionality provided on the page. The search bar is clearly labeled and appears to be designed for entering specific topics or fields of interest.

Action:

```
```json
```

```
{
  "name": "type",
  "arguments": {
    "text": "data science",
    "element_id": "4",
    "field_description": "search input field",
    "reasoning": "I need to search for data science-related bootcamps"
  }
}
```

```
```
```

## Screenshots:

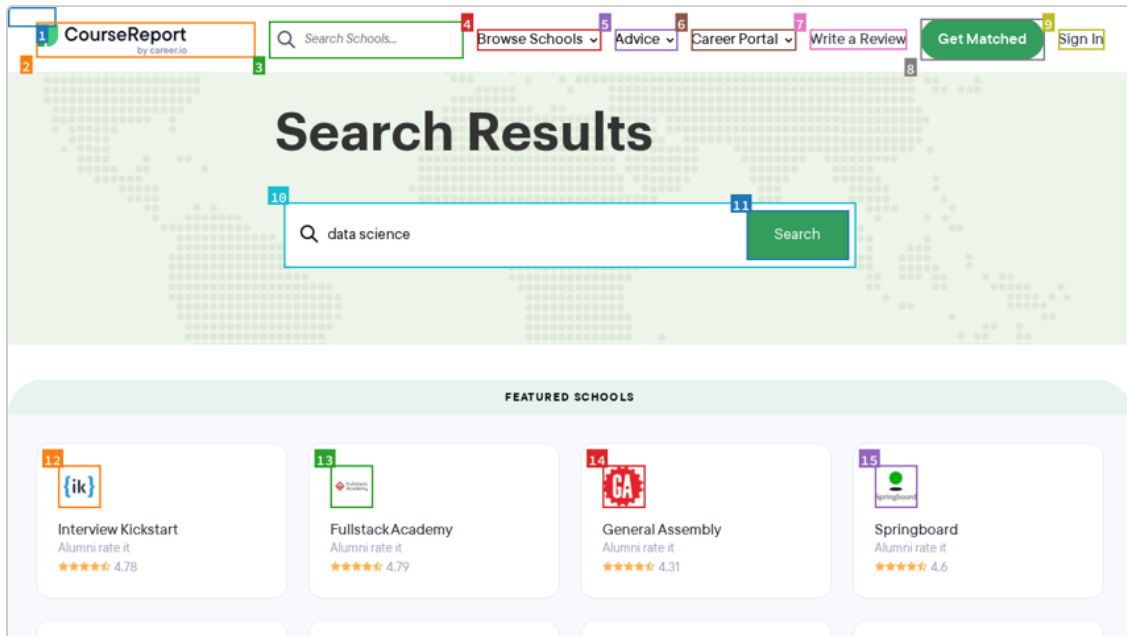

## Response:

To find a bootcamp focused on data science, I'll start by executing the search with the current query "data science" to see the available results.

Action:

```
```json
```

```
{
  "name": "click",
  "arguments": {
    "element_id": "11",
    "description": "Search button to execute the search for 'data science'",
    "reasoning": "Clicking the search button will display results related to data science bootcamps"
  }
}
```

```
}  
...  

```

Step 7 (2025-09-18T11:32:36.207102)

## Screenshots:

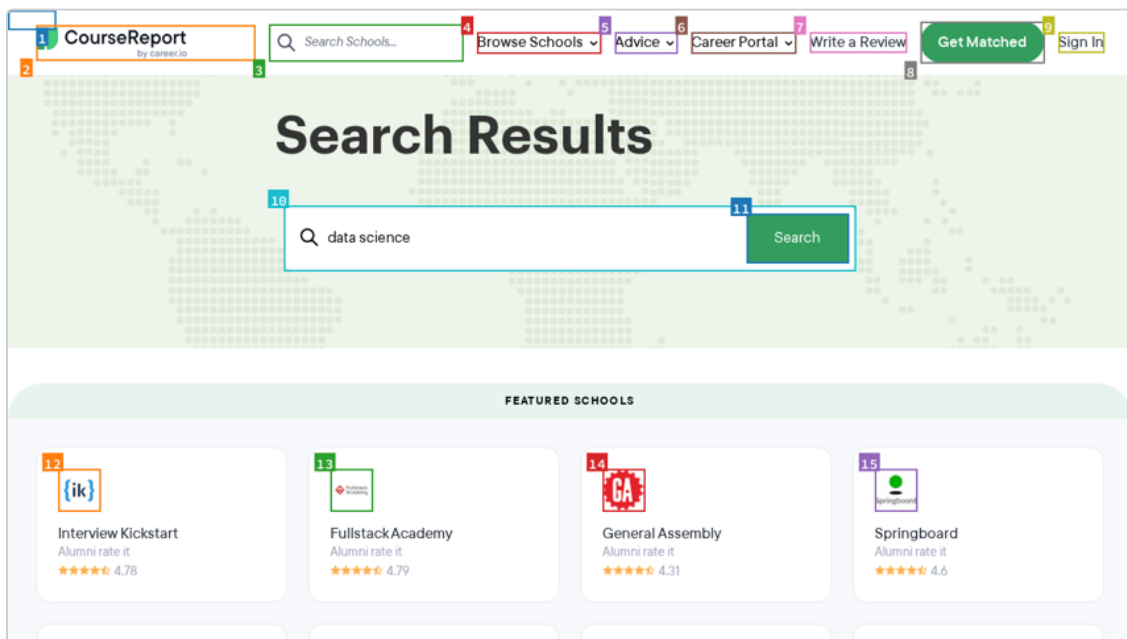

## Response:

To find a bootcamp focused on data science, I'll start by interacting with the search bar to ensure the search term is correctly entered and initiate the search process.

Action:

```
```json
```

```
{  
  "name": "click",  
  "arguments": {  
    "element_id": "11",  
    "description": "Search button next to the search bar",  
  },  
}
```



"reasoning": "Clicking the search button will confirm the search for 'data science' and display relevant results."

```
}  
}  
...
```

Step 8 (2025-09-18T11:32:47.150215)

## Screenshots:

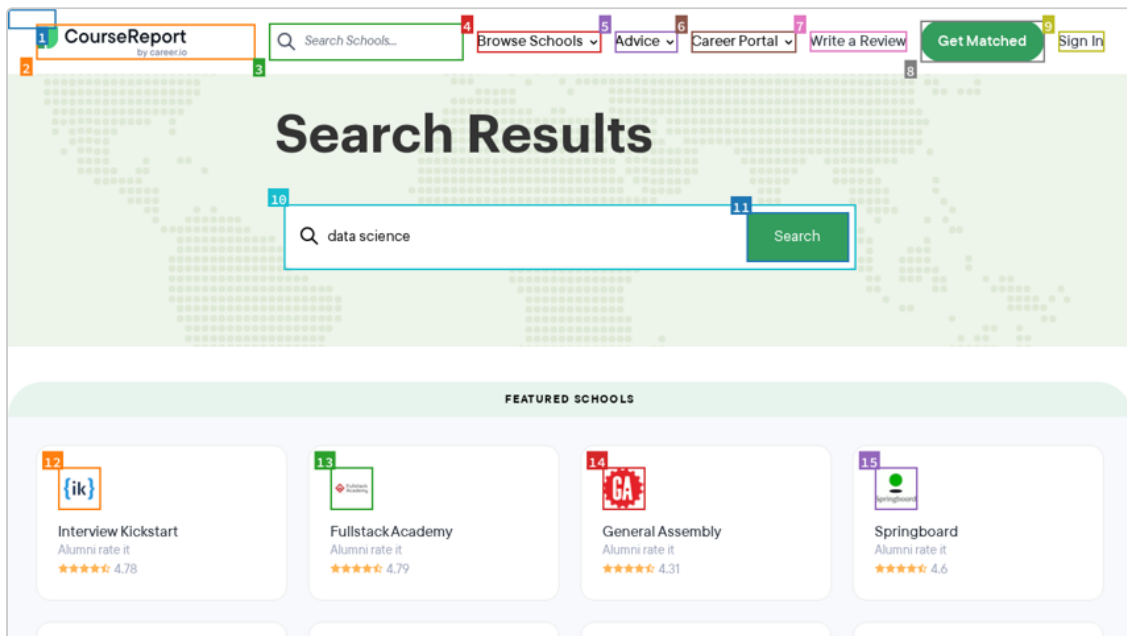

## Response:

To find a bootcamp focused on data science, I'll start by clicking the "Search" button to initiate the search with the term "data science."

Action:

```
```json
```

```
{  
  "name": "click",  
  "arguments": {
```

```
"element_id": "11",
"description": "Search button next to the search bar",
"reasoning": "Clicking the search button will execute the search for data
science-related bootcamps"
}
}
...

```

Step 9 (2025-09-18T11:32:57.109524)

## Screenshots:

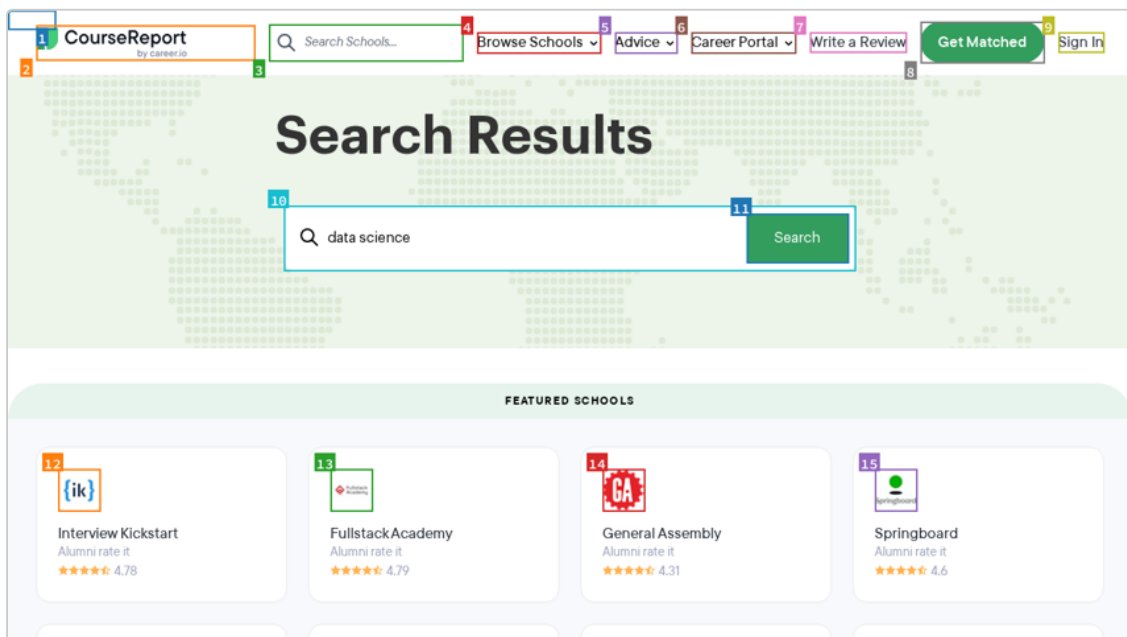

## Response:

To find a bootcamp focused on data science, I'll start by initiating the search using the provided search term "data science."

Action:

```
```json
{

```

```
"name": "click",
"arguments": {
  "element_id": "11",
  "description": "Search button next to the search bar",
  "reasoning": "Clicking the search button will execute the search for data
science courses"
}
}
...
```

## Step 10 (2025-09-18T11:33:07.091425)

### Screenshots:

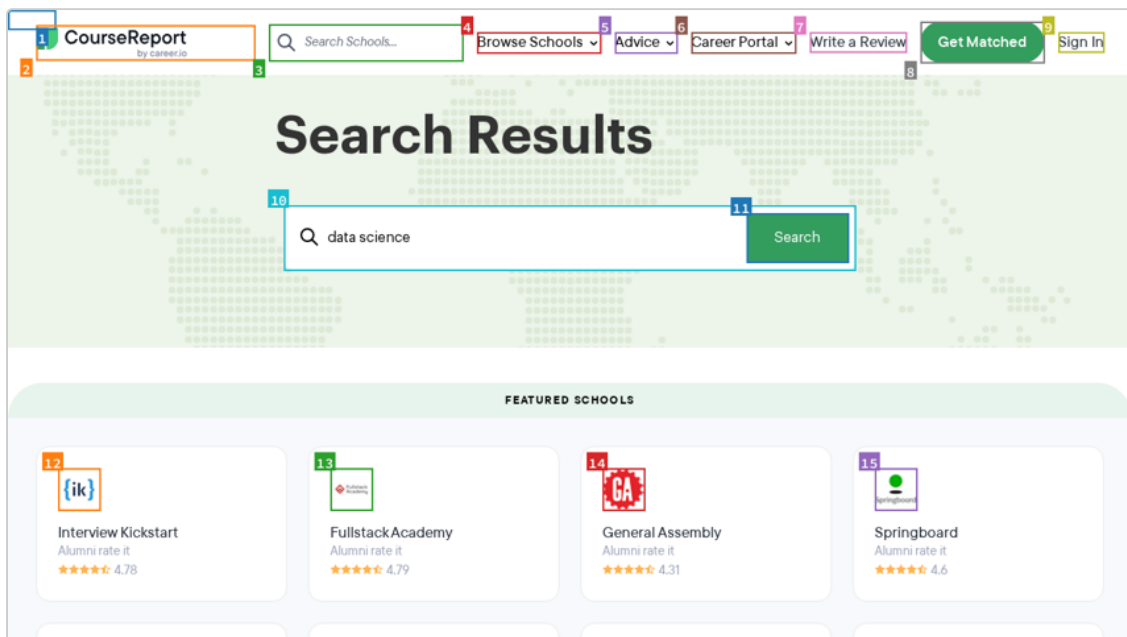

### Response:

To find a bootcamp focused on data science, I'll start by executing the search query that's already entered in the search bar. This should display relevant results.

Action:

```
```json
{
  "name": "click",
  "arguments": {
    "element_id": "11",
    "description": "Search button next to the search bar",
    "reasoning": "Clicking the search button will execute the search for data science-related bootcamps"
  }
}
```
```

## Step 11 (2025-09-18T11:33:17.101751)

### Screenshots:

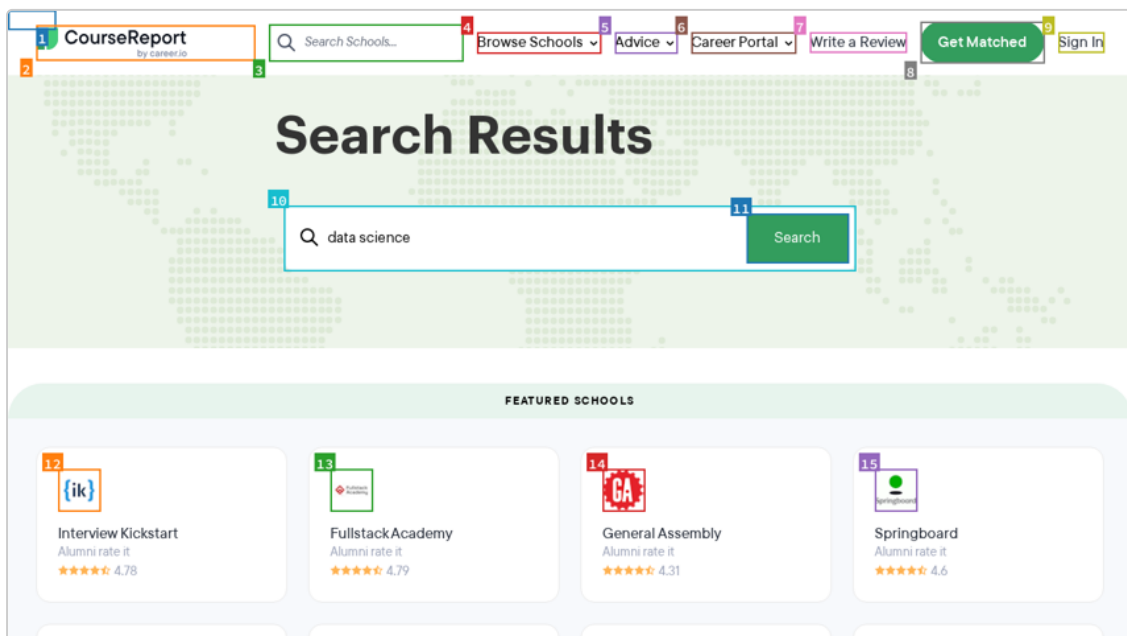

## Response:

To find a bootcamp focused on data science, I'll start by clicking the "Search" button to ensure the search results are updated based on the entered keyword "data science."

Action:

```
```json
{
  "name": "click",
  "arguments": {
    "element_id": "11",
    "description": "Search button next to the search bar",
    "reasoning": "Clicking the Search button will update the results based on the entered keyword 'data science'."
  }
}
```
```

**Step 12** (2025-09-18T11:33:27.137066)

## Screenshots:

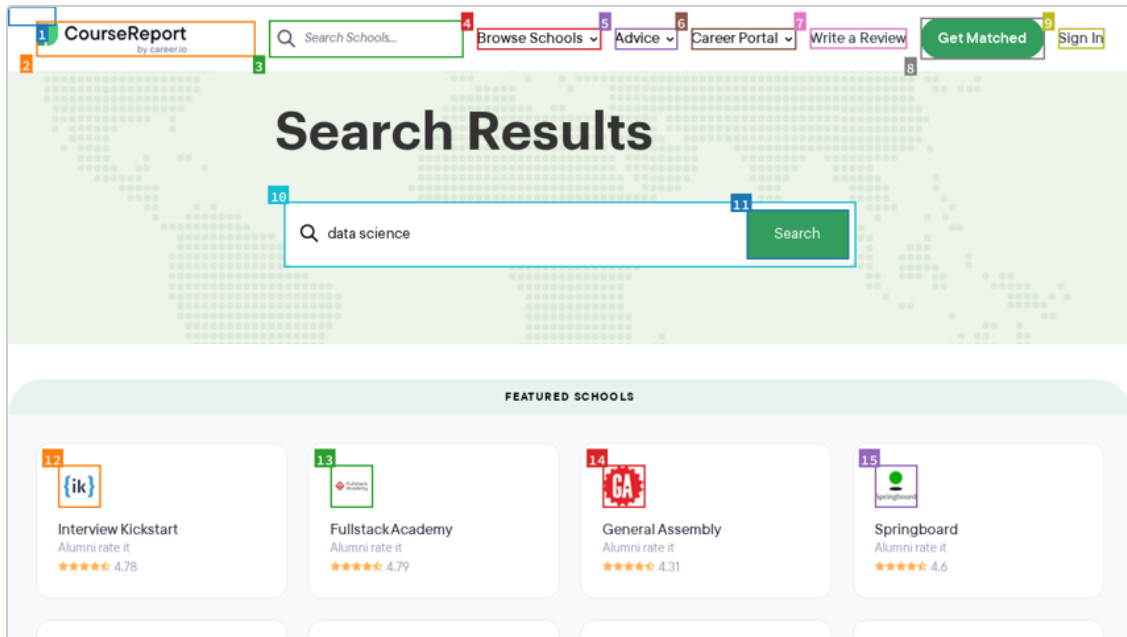

## Response:

```
```json
{
  "name": "click",
  "arguments": {
    "element_id": "11",
    "description": "Search button",
    "reasoning": "Clicking the Search button will initiate the search for data science bootcamps based on the entered query."
  }
}
```
```

Step 13 (2025-09-18T11:33:36.252637)

## Screenshots:

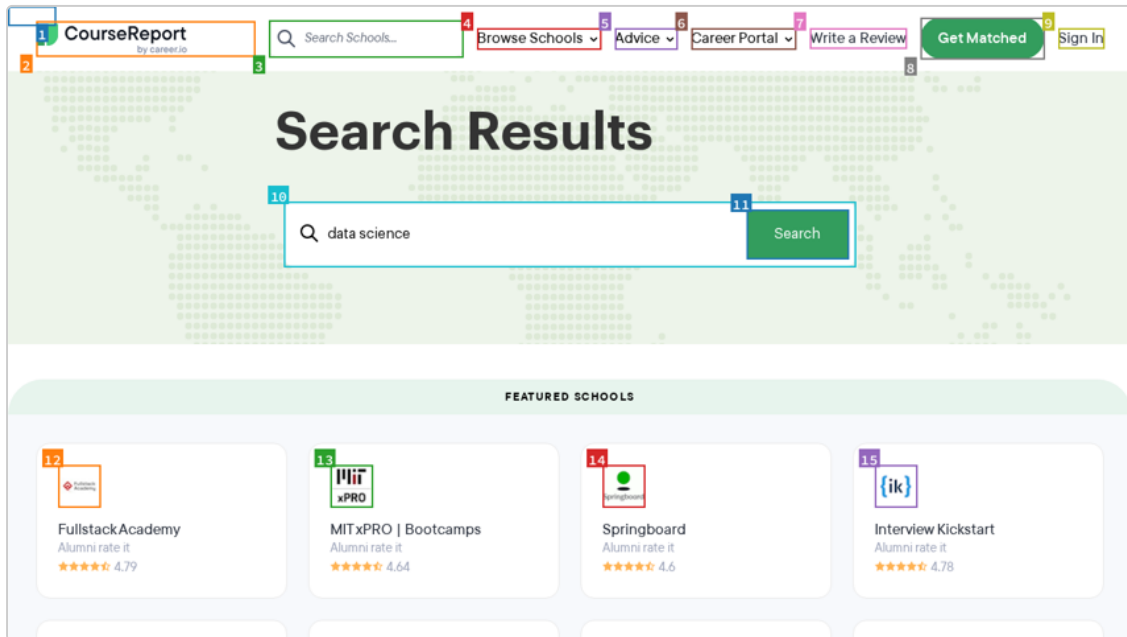

## Response:

```
```json
{
  "name": "click",
  "arguments": {
    "element_id": "13",
    "description": "MITxPRO | Bootcamps",
    "reasoning": "Click on the MITxPRO | Bootcamps option as it appears to be a relevant bootcamp focused on data science."
  }
}
```
```

Step 14 (2025-09-18T11:33:46.496726)

## Screenshots:

## Response:

Thought: Since the goal is to find a bootcamp focused on data science, I notice that the current page already highlights MIT xPRO Bootcamps, which includes a Data Science and Data Analytics course. This matches the requirement. I should confirm this option and proceed to stop the process.

Action: `{{"name": "stop", "arguments": {"answer": "MIT xPRO Bootcamps offer a Data Science and Data Analytics course, which aligns with the goal of finding a bootcamp focused on data science.", "reasoning": "The current page already displays relevant information about a data science-focused bootcamp."}}}`
