# Supplementary material
Source: ML conference proceedings conference paper supplement (https://openreview.net/forum?id=cvAZKWA1HZ)
Supplement: supplementary_material [file education_tasks_education_V2_new_213.pdf › supplementary_materials/trajectory_evaluation/education_tasks_education_V2_new_213.pdf]

# Task Report

**Session ID:** education\_tasks\_education\_V2\_new\_213

**Task Description:** Search for the program description of the Cybersecurity Offense and Defense Certificate

**Total Rounds:** 7

**Step 1 (2025-10-16T07:38:42.381199)**

## Screenshots:

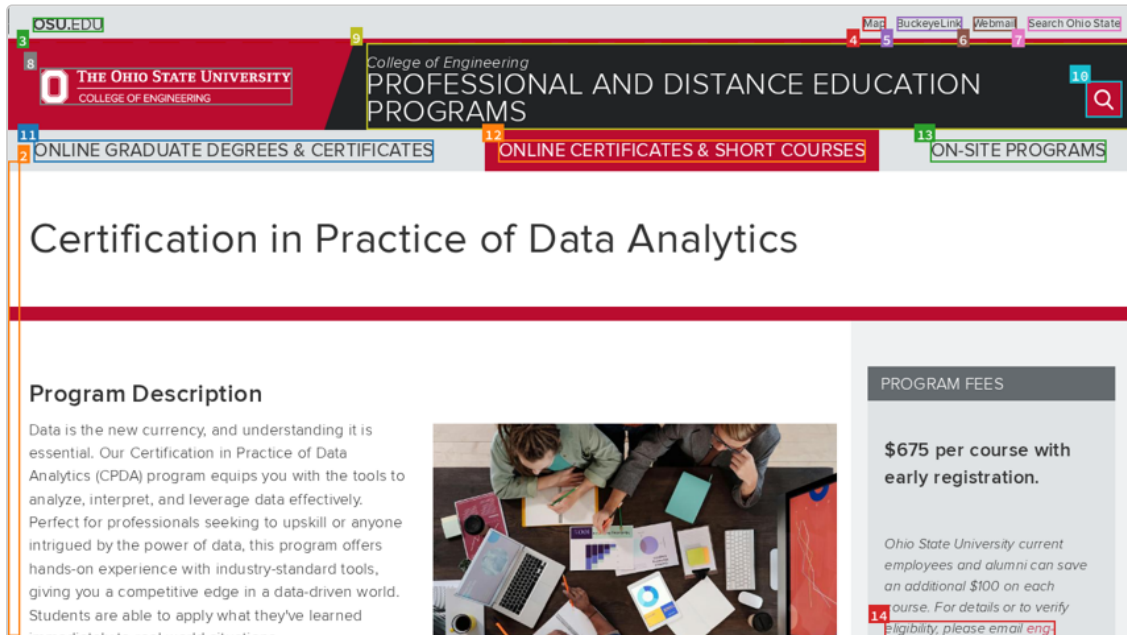

## Response:

Thought: To find the program description for the Cybersecurity Offense and Defense Certificate, I need to search for it on the page. Since there is

a search icon (element 19) available, I will use it to initiate a search.

Action:

```
```json
{
  "name": "click",
  "arguments": {
    "element_id": "19",
    "description": "Search icon",
    "reasoning": "Clicking the search icon will allow me to enter the search term for the Cybersecurity Offense and Defense Certificate."
  }
}
```
```

## Step 2 (2025-10-16T07:38:52.262505)

### Screenshots:

The screenshot shows the Ohio State University website. The header includes the OSU logo and navigation links: Map, BuckeyeLink, Webmail, and Search Ohio State. The main navigation bar lists: ONLINE GRADUATE DEGREES & CERTIFICATES, ONLINE CERTIFICATES & SHORT COURSES, and ON-SITE PROGRAMS. The main heading is 'Certification in Practice of Data Analytics'. Below this, there is a 'Program Description' section and a 'Program Fees' section. The 'Program Description' text states: 'Data is the new currency, and understanding it is essential. Our Certification in Practice of Data Analytics (CPDA) program equips you with the tools to analyze, interpret, and leverage data effectively. Perfect for professionals seeking to upskill or anyone intrigued by the power of data, this program offers hands-on experience with industry-standard tools, giving you a competitive edge in a data-driven world. Students are able to apply what they've learned immediately to real-world situations.' The 'Program Fees' section states: '\$675 per course with early registration.' and mentions a discount for current employees and alumni. A search bar is visible in the top right corner of the page.

**Program Description**

Data is the new currency, and understanding it is essential. Our Certification in Practice of Data Analytics (CPDA) program equips you with the tools to analyze, interpret, and leverage data effectively. Perfect for professionals seeking to upskill or anyone intrigued by the power of data, this program offers hands-on experience with industry-standard tools, giving you a competitive edge in a data-driven world. Students are able to apply what they've learned immediately to real-world situations.

**Program Fees**

**\$675 per course with early registration.**

Ohio State University current employees and alumni can save an additional \$100 on each course. For details or to verify eligibility, please email [eng-1](#).

## Response:

```
```json
{
  "name": "type",
  "arguments": {
    "text": "Cybersecurity Offense and Defense Certificate",
    "element_id": "11",
    "field_description": "search input field",
    "reasoning": "I need to search for the program description of the
Cybersecurity Offense and Defense Certificate"
  }
}
```
```

## Step 3 (2025-10-16T07:39:05.019852)

## Screenshots:

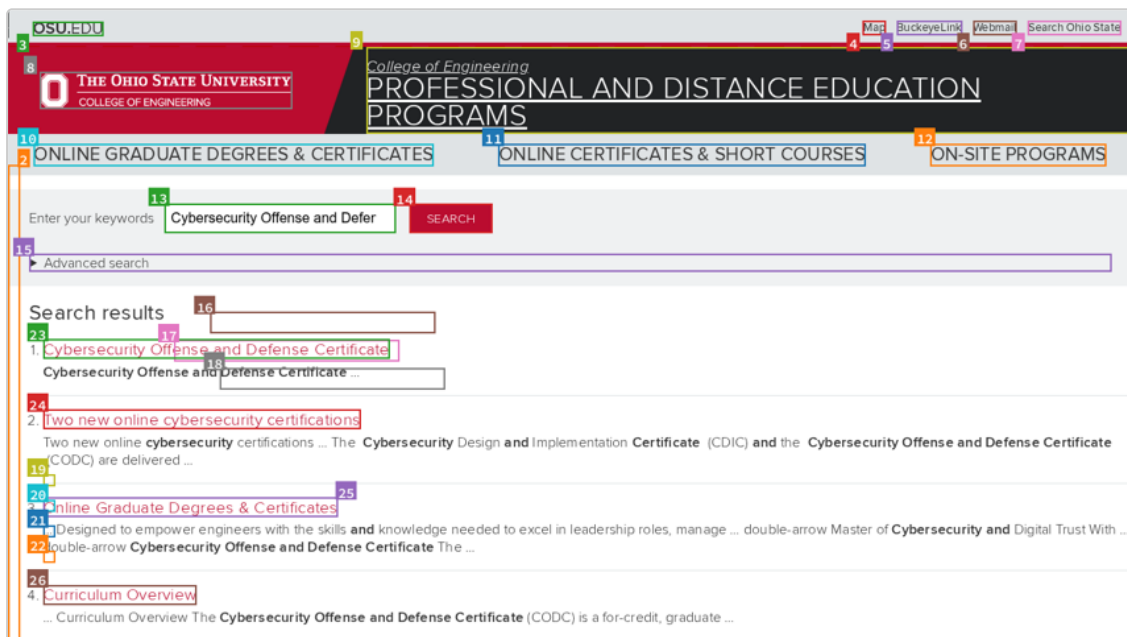

## Response:

```
``json
{
  "name": "click",
  "arguments": {
    "element_id": "17",
    "description": "Cybersecurity Offense and Defense Certificate link",
    "reasoning": "Clicking this link will likely lead to the program description for the Cybersecurity Offense and Defense Certificate."
  }
}
```

## Step 4 (2025-10-16T07:39:17.869192)

## Screenshots:

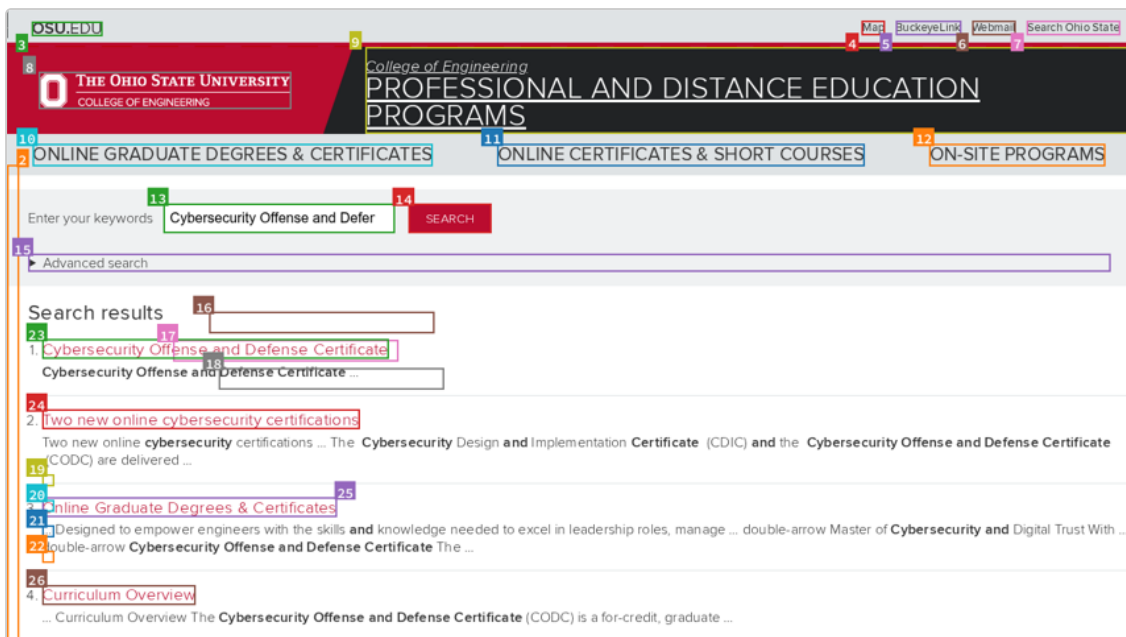

## Response:

To find the program description of the Cybersecurity Offense and Defense Certificate, I need to click on the search result link for this certificate. The link is clearly visible in the search results.

**\*\*Reasoning:\*\*** The search results already show the relevant program, so I should click on the link to access its detailed description.

```
```json
{
  "name": "click",
  "arguments": {
    "element_id": "17",
    "description": "Cybersecurity Offense and Defense Certificate link",
    "reasoning": "Clicking this link will lead to the program description."
  }
}
```
```

**Step 5 (2025-10-16T07:39:29.078074)**

## Screenshots:

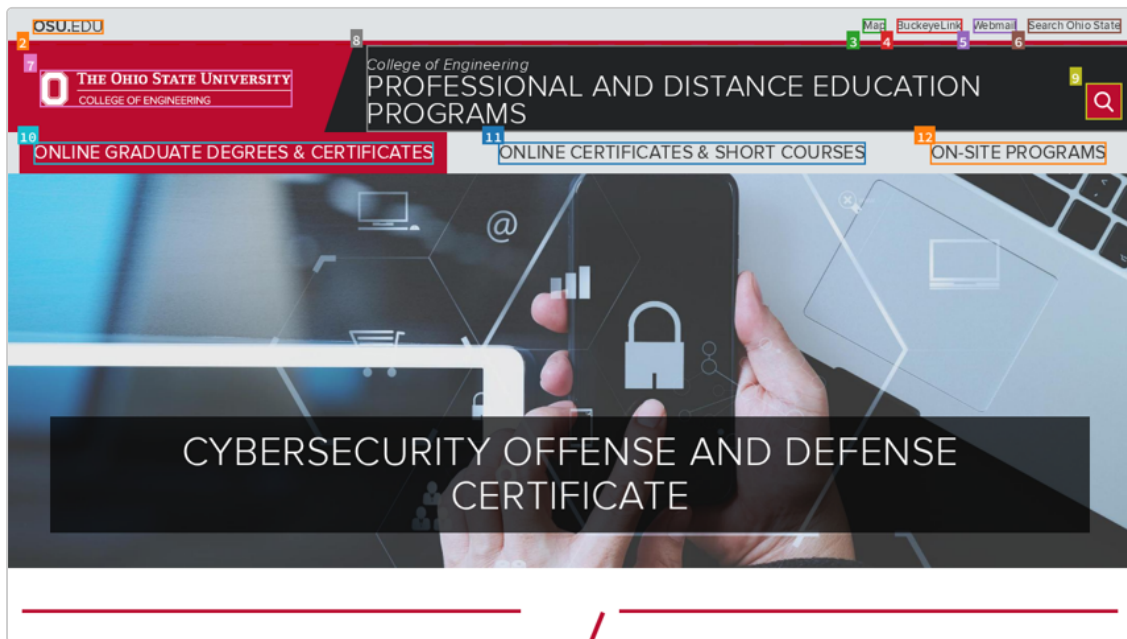

## Response:

To find the program description of the Cybersecurity Offense and Defense Certificate, I should start by clicking on the main interactive element, which is the text "CYBERSECURITY OFFENSE AND DEFENSE CERTIFICATE." This is likely to lead to more detailed information about the program.

**\*\*Action:\*\***

```json

{

  "name": "click",

  "arguments": {

    "element\_id": "11",

    "description": "CYBERSECURITY OFFENSE AND DEFENSE  
CERTIFICATE",

    "reasoning": "Clicking this element will likely lead to the program  
description."

}

```
}  
...
```

**Step 6 (2025-10-16T07:39:43.404092)**

## Screenshots:

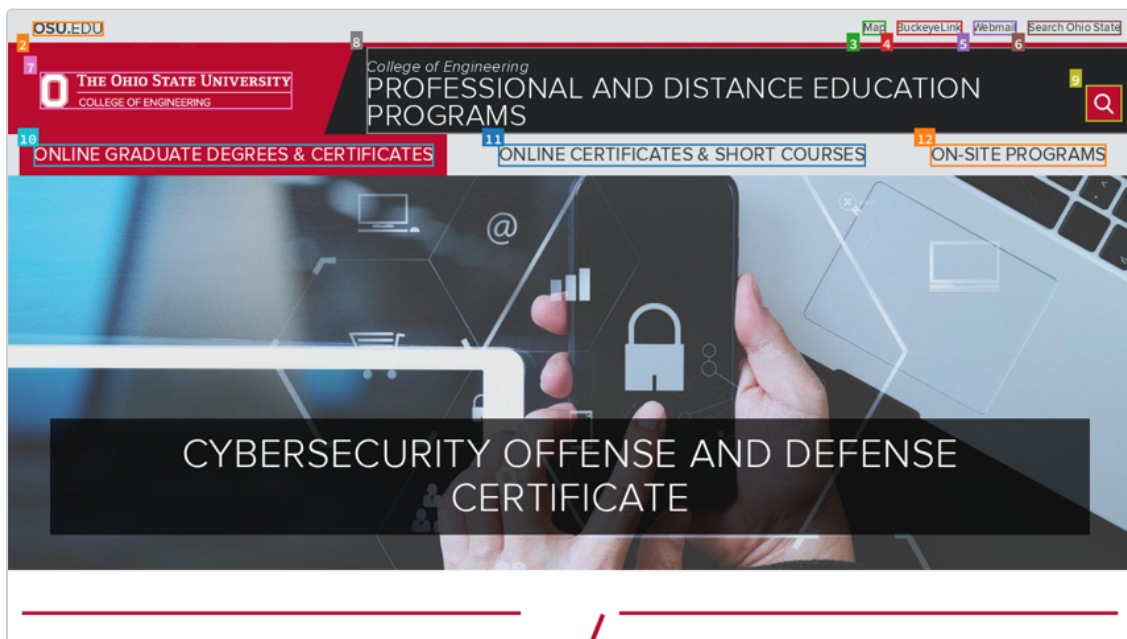

## Response:

To find the program description of the Cybersecurity Offense and Defense Certificate, I should explore the page further. Since the main banner highlights the certificate, I will scroll down to look for more detailed information.

**\*\*Action:\*\***

```json

```
{  
  "name": "scroll",  
  "arguments": {  
    "direction": "down",
```

"reasoning": "I need to scroll down to find the program description of the Cybersecurity Offense and Defense Certificate"

```
}  
}  
...
```

## Step 7 (2025-10-16T07:39:54.072399)

### Screenshots:

**4 Cybersecurity Courses**

The Cybersecurity Offense and Defense Certificate (CODC) enables students to broaden their existing knowledge or open new opportunities in a professional career helping to solve cybersecurity challenges in both government and business. The Offense and Defense certificate allows students that have already earned at least a baccalaureate degree in engineering, and/or other STEM fields, to develop new expertise in the field of cybersecurity. The certificate specifically addresses the offense and defense of cybersecurity measures in digital systems. The CODC is provided by The Ohio State University [Institute for Cybersecurity and Digital Trust](#) and the [Computer Science and Engineering](#) department in the College of Engineering.

The Offense and Defense Certificate is a for-credit, graduate level program, delivered 100% online, and upon completion students receive an official certificate from The Ohio State University Graduate School. The CODC curriculum includes four courses and students must complete 12 credit hours to earn the certificate. Students may select their own pace in completing the certificate.

**Certificate Learning Objectives**

Students enrolled in the certificate program will learn both the fundamental science skills (including cryptography and game theory) and practical skills

### Response:

Thought: The program description for the Cybersecurity Offense and Defense Certificate is already visible on the current page. I can extract the necessary information directly from the text provided.

Action:

```
```json
```

```
{
```

```
  "name": "stop",
```



```
"arguments": {
```

```
  "answer": "The Cybersecurity Offense and Defense Certificate (CODC) is a graduate-level, online program offered by The Ohio State University's Institute for Cybersecurity and Digital Trust in collaboration with the Computer Science and Engineering department. It is designed for students with at least a bachelor's degree in engineering or other STEM fields. The program focuses on broadening knowledge in cybersecurity, specifically in offense and defense measures in digital systems. It requires the completion of four courses and 12 credit hours, allowing students to earn a certificate at their own pace.",
```

```
  "reasoning": "The program description is already visible on the current page, so no further actions are needed."
```

```
}
```

```
}
```

```
...
```
