# Supplementary material
Source: ML conference proceedings conference paper supplement (https://openreview.net/forum?id=cvAZKWA1HZ)
Supplement: supplementary_material [file entertainment_tasks_entertainment_537.pdf › supplementary_materials/trajectory_evaluation/entertainment_tasks_entertainment_537.pdf]

# Task Report

**Session ID:** entertainment\_tasks\_entertainment\_537

**Task Description:** Locate a detailed case study of a successful marketing campaign.

**Total Rounds:** 5

**Step 1** (2025-09-18T00:46:36.179684)

## Screenshots:

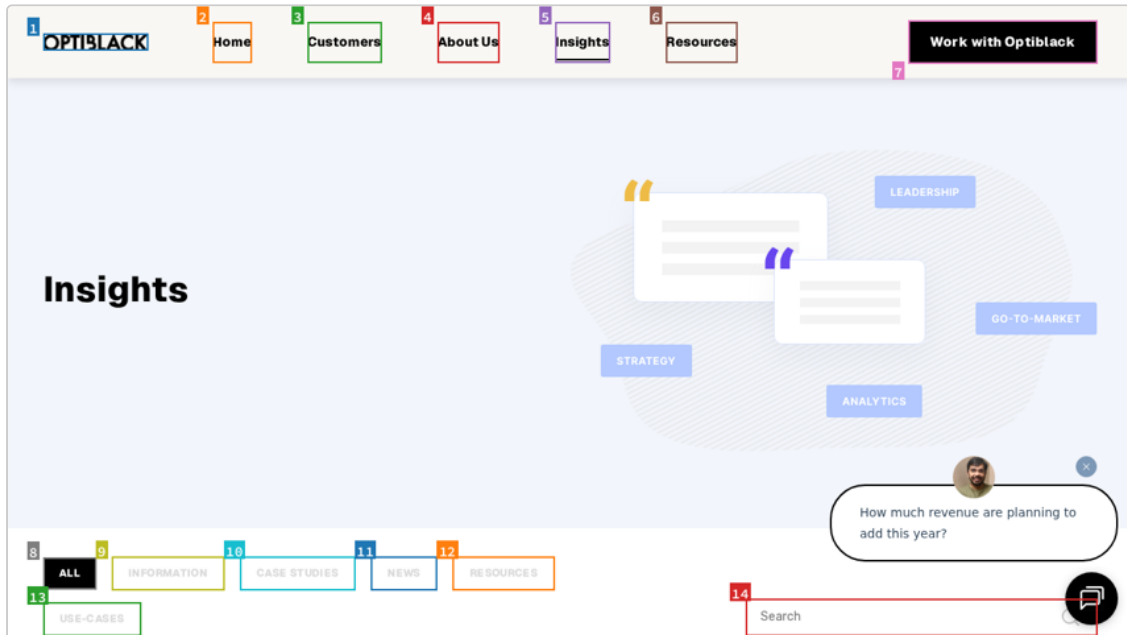

## Response:

To locate a detailed case study of a successful marketing campaign, I'll start by exploring the "CASE STUDIES" category, as it is most relevant to

my goal.

Action:

```
``json
{
  "name": "click",
  "arguments": {
    "element_id": "10",
    "description": "CASE STUDIES category",
    "reasoning": "Exploring the CASE STUDIES section is the most direct way to find a detailed case study of a successful marketing campaign."
  }
}
```

## Step 2 (2025-09-18T00:46:47.063355)

### Screenshots:

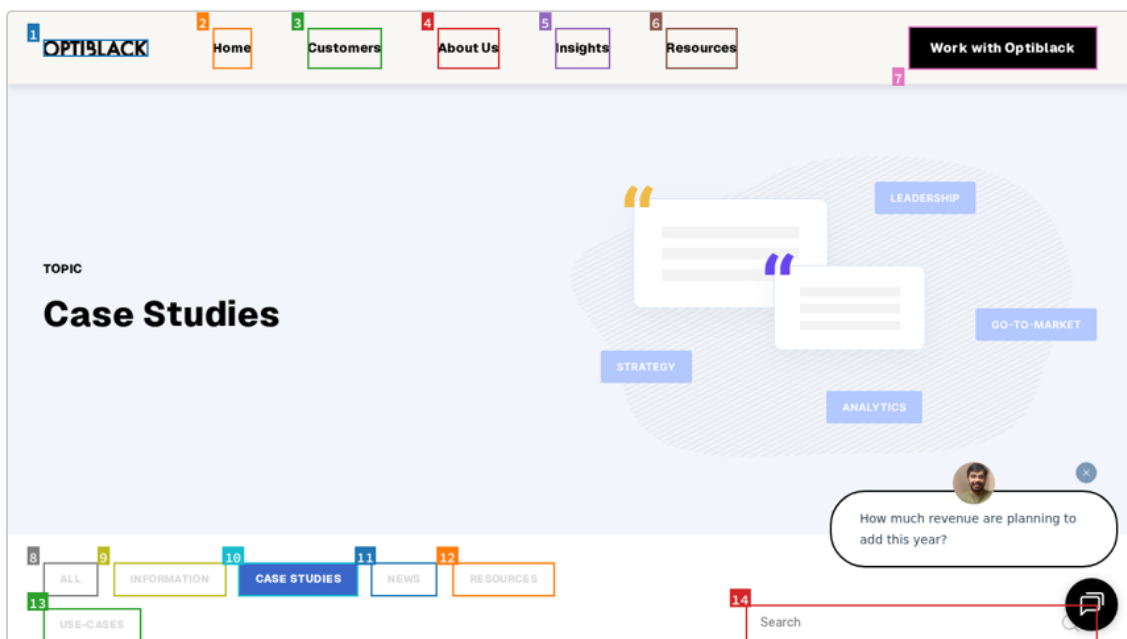

## Response:

To locate a detailed case study of a successful marketing campaign, I'll start by utilizing the available filters and search functionality. Since the "CASE STUDIES" tab is already selected, I'll proceed to use the search bar to refine my search.

**\*\*Action:\*\***

```
```json
{
  "name": "type",
  "arguments": {
    "text": "successful marketing campaign",
    "element_id": "14",
    "field_description": "Search input field",
    "reasoning": "I need to search for a detailed case study related to a
successful marketing campaign"
  }
}
```
```

**Step 3 (2025-09-18T00:46:59.805695)**

## Screenshots:

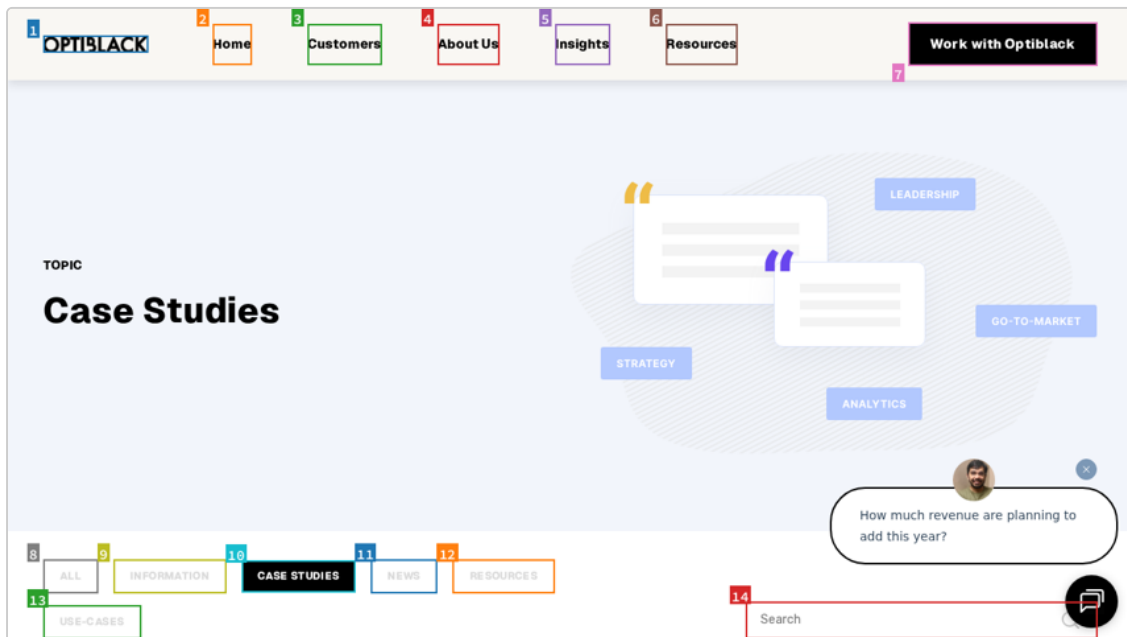

## Response:

To locate a detailed case study of a successful marketing campaign, I'll start by exploring the available filters and using the search functionality if needed. Since the "CASE STUDIES" filter is already selected, I'll proceed to scroll the page to look for relevant case studies.

Action:

```
```json
```

```
{
```

```
  "name": "scroll",
```

```
  "arguments": {
```

```
    "direction": "down",
```

```
    "reasoning": "Scrolling down to explore available case studies"
```

```
  }
```

```
}
```

```
```
```

## Screenshots:

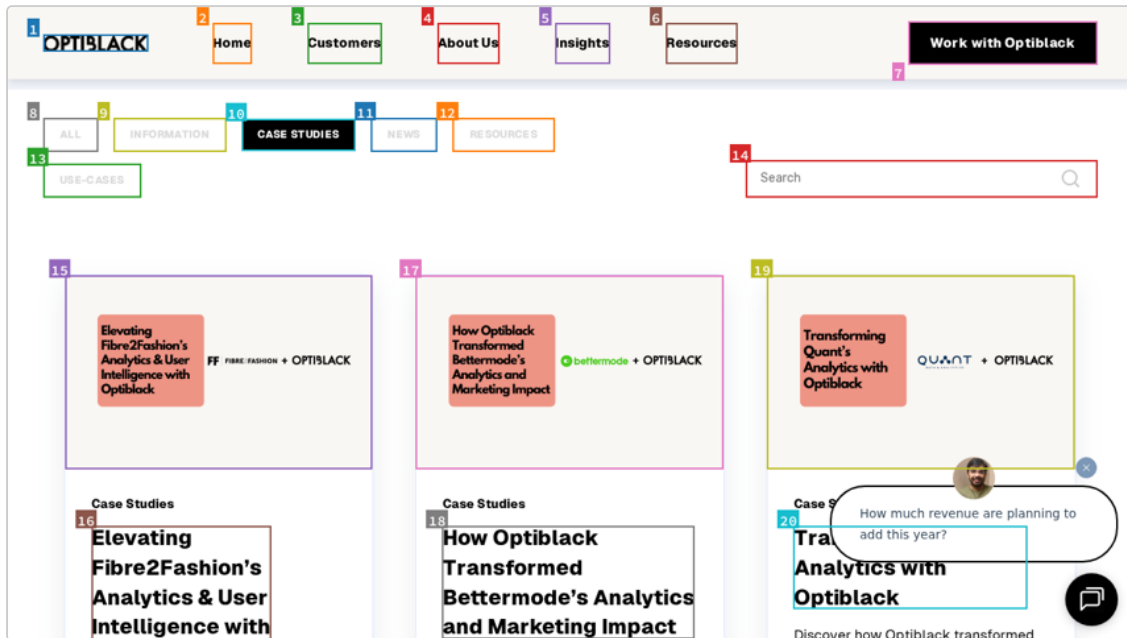

## Response:

To locate a detailed case study of a successful marketing campaign, I'll start by exploring the visible case studies on the page. Since the goal is to find a detailed case study, I'll begin by interacting with one of the case studies listed.

### ### Reasoning:

The page already displays several case studies, such as:

1. "Elevating Fibre2Fashion's Analytics & User Intelligence with Optiblack"
2. "How Optiblack Transformed Bettermode's Analytics and Marketing Impact"
3. "Transforming Quant's Analytics with Optiblack"

These seem relevant to the task of finding a successful marketing campaign case study. I'll click on one of these to explore further details.

### Action:

I'll click on the second case study titled "How Optiblack Transformed Bettermode's Analytics and Marketing Impact" since it explicitly mentions marketing impact, which aligns well with the goal.

```
```json
{
  "name": "click",
  "arguments": {
    "element_id": "17",
    "description": "Case Study: How Optiblack Transformed Bettermode's Analytics and Marketing Impact",
    "reasoning": "This case study explicitly mentions marketing impact, making it a strong candidate for a detailed marketing campaign case study."
  }
}
```
```

**Step 5** (2025-09-18T00:47:23.593570)

## Screenshots:

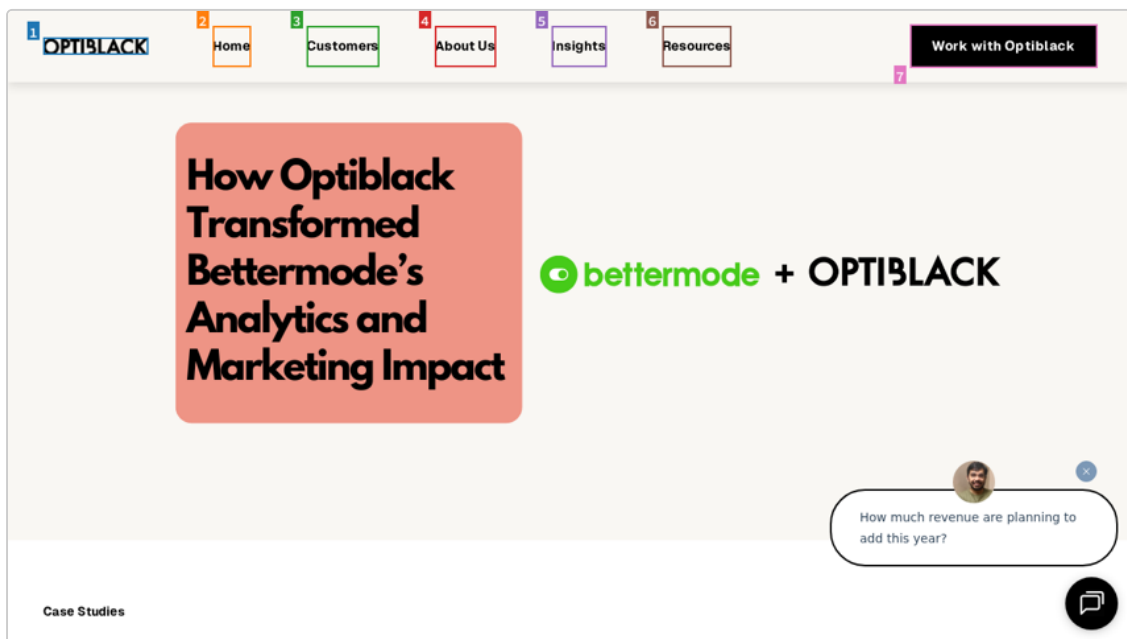

## Response:

Thought: The goal is to locate a detailed case study of a successful marketing campaign. The current page already displays a relevant case study titled "How Optiblack Transformed Bettermode's Analytics and Marketing Impact." This seems to align well with the task objective.

Action: Since the case study is visible and matches the requirement, I will proceed to stop and provide the answer.

```
```json
{
  "name": "stop",
  "arguments": {
    "answer": "The detailed case study of a successful marketing campaign is titled 'How Optiblack Transformed Bettermode's Analytics and Marketing Impact.' It is prominently displayed on the current page.",
    "reasoning": "The case study matches the task requirements and is clearly visible on the page."
  }
}
```

```
}  
}  
...
```
