# Supplementary material
Source: ML conference proceedings conference paper supplement (https://openreview.net/forum?id=cvAZKWA1HZ)
Supplement: supplementary_material [file entertainment_tasks_entertainment_V71_277.pdf › supplementary_materials/trajectory_evaluation/entertainment_tasks_entertainment_V71_277.pdf]

# Task Report

**Session ID:** entertainment\_tasks\_entertainment\_V71\_277

**Task Description:** Search for the hashtag "#coffee" and list its top 3 posts

**Total Rounds:** 10

**Step 1** (2025-10-08T22:55:27.868967)

## Screenshots:

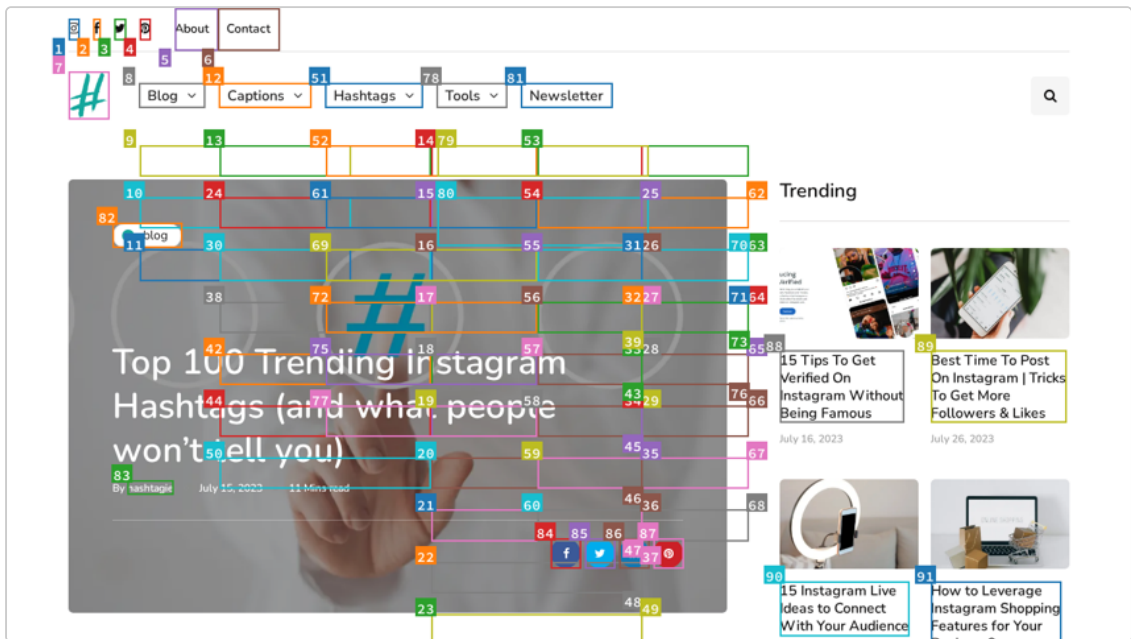

## Response:

To search for the hashtag "#coffee" and list its top 3 posts, I need to first locate a search input field or a relevant section on the page where I can enter the hashtag. The current page seems to have a search icon

(magnifying glass) at the top right, which is likely used for searching content on the site.

**\*\*Reasoning:\*\*** The search icon is a common element for initiating searches on websites. By clicking it, I can access the search functionality and enter the desired hashtag.

```
```json
{
  "name": "click",
  "arguments": {
    "element_id": "120",
    "coords": "1190 98",
    "description": "Search icon (magnifying glass) at the top right",
    "reasoning": "Clicking the search icon will allow me to enter the hashtag '#coffee' and find related posts."
  }
}
```
```

**Step 2** (2025-10-08T22:55:43.017036)

## Screenshots:

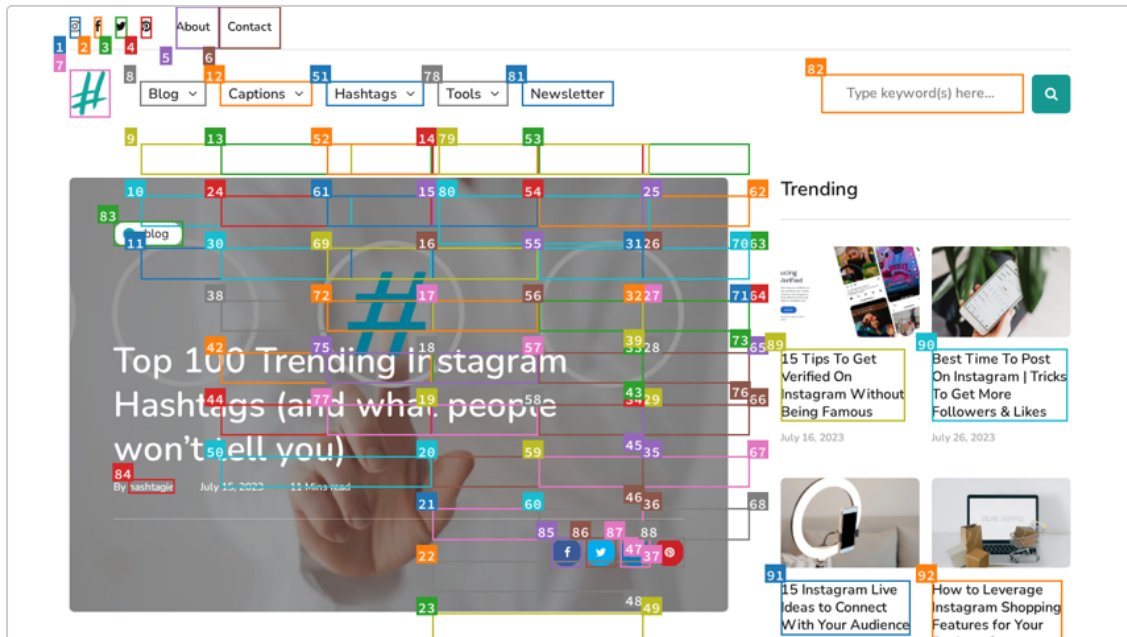

## Response:

To search for the hashtag "#coffee" and list its top 3 posts, I need to use the search bar on the page. Here's the plan:

1. **Type the search term**: Enter "#coffee" into the search bar.
2. **Initiate the search**: Click the search button to execute the search.
3. **Locate the results**: Look for posts related to "#coffee" and identify the top 3 posts.
4. **Stop and provide the answer**: Once the top 3 posts are identified, stop the process and provide the answer.

Let's start by typing the search term.

```
``json
{
  "name": "type",
  "arguments": {
    "text": "#coffee",
```

```

"element_id": "82",
"field_description": "search input field",
"reasoning": "I need to search for posts related to #coffee"
}
}
...

```

### Step 3 (2025-10-08T22:55:55.360374)

#### Screenshots:

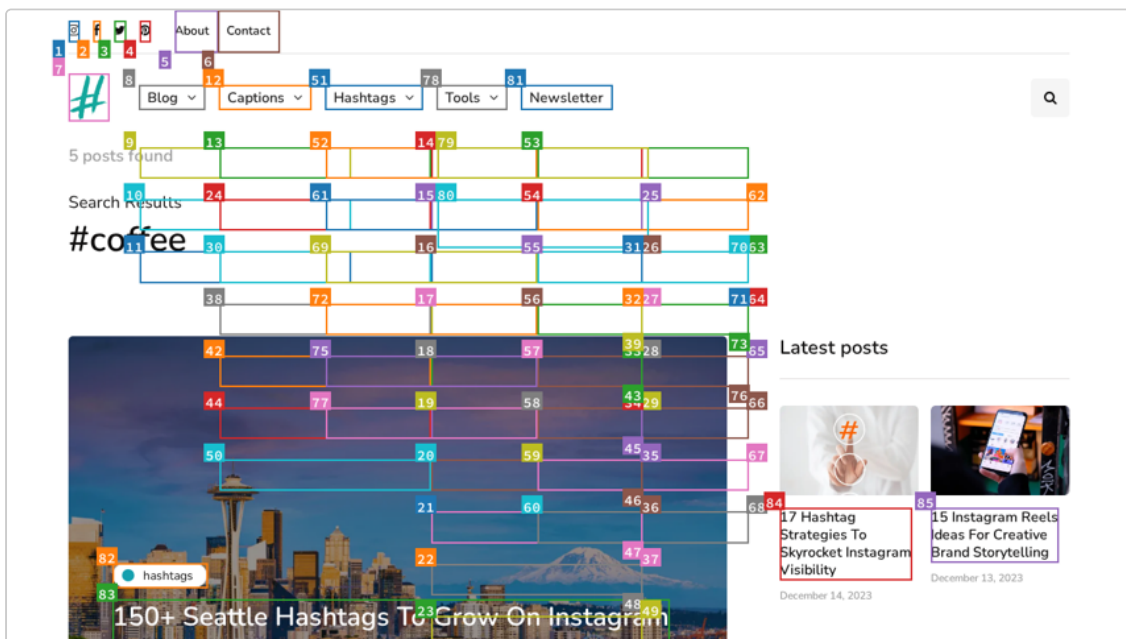

#### Response:

To find the top 3 posts for the hashtag "#coffee," I need to interact with the search results displayed on the page. The numbered boxes in the grid likely represent different hashtags or related terms. I should start by clicking on one of these boxes to explore the posts associated with the "#coffee" hashtag.

Action: Click on one of the numbered boxes in the hashtag grid to view the

posts related to "#coffee."

```
``json
{
  "name": "click",
  "arguments": {
    "element_id": "16",
    "coords": "320 220",
    "description": "Box 16 in the hashtag grid",
    "reasoning": "Clicking on this box may lead to posts related to the
'#coffee' hashtag."
  }
}
```

#### Step 4 (2025-10-08T22:56:09.856404)

### Screenshots:

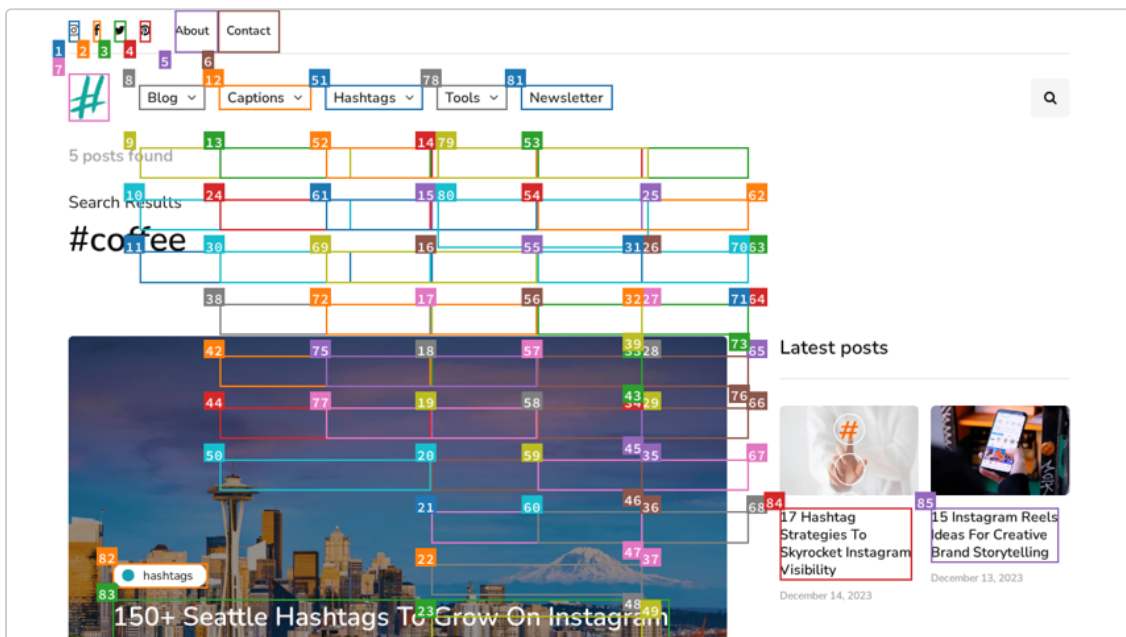

## Response:

To achieve the goal of listing the top 3 posts for the hashtag "#coffee," I need to identify and interact with the search results or posts displayed on the page. The current screenshot shows a list of posts with numerical labels, which likely correspond to individual posts. I will start by clicking on the first post to view its details.

**\*\*Action:\*\***

```json

{

"name": "click",

"arguments": {

"element\_id": "16",

"coords": "158 210",

"description": "Post 1 (labeled as 16)",

"reasoning": "Clicking on the first post to view its details as part of listing the top 3 posts for #coffee."

}

}

...

**Step 5** (2025-10-08T22:56:22.107597)

## Screenshots:

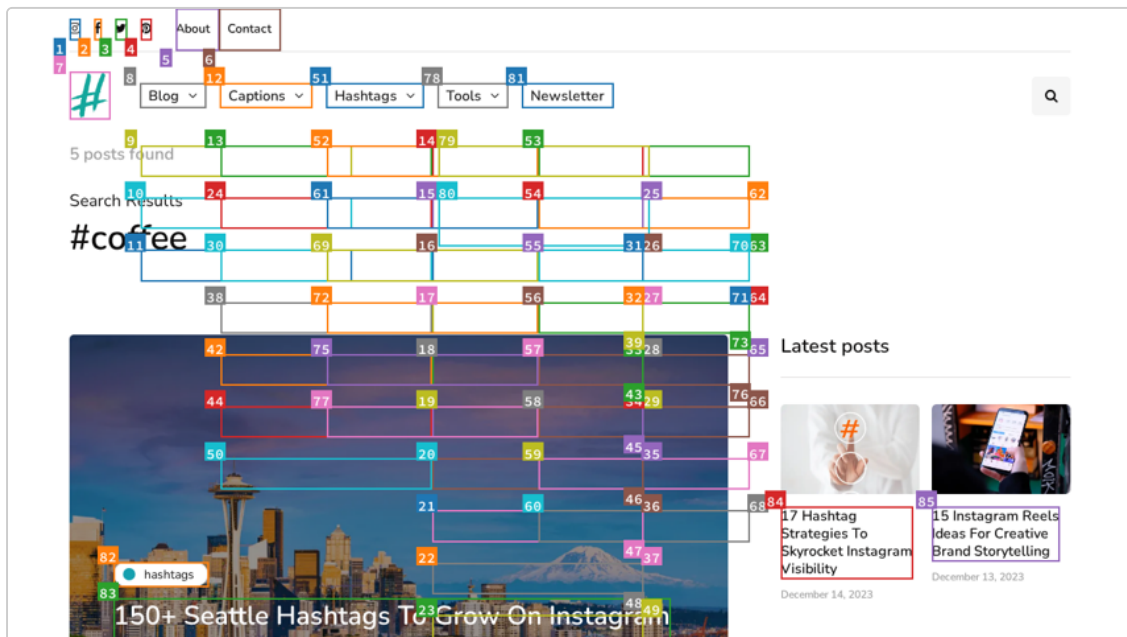

## Response:

To achieve the goal of listing the top 3 posts for the hashtag "#coffee," I need to interact with the search results displayed on the page. The current view shows a network-like structure of interconnected boxes, which likely represent different posts or content pieces related to the hashtag. I will start by clicking on the search results to explore the posts further.

### ### Reasoning:

1. The search results for "#coffee" are already displayed, indicating that the search term is correct and relevant.
2. The interconnected boxes suggest a network of related posts, but I need to identify the top posts. Typically, these might be the most prominent or central nodes in the network.
3. Clicking on one of the numbered boxes in the search results should provide more details about the corresponding post.

### ### Action:

I will click on one of the numbered boxes in the search results to explore

the details of a post.

```
``json
{
  "name": "click",
  "arguments": {
    "element_id": "16",
    "coords": "320,220",
    "description": "Box 16 in the search results, representing a post related to #coffee",
    "reasoning": "Clicking on this box will likely provide more details about the post, helping me identify the top posts."
  }
}
```

## Step 6 (2025-10-08T22:56:38.254307)

### Screenshots:

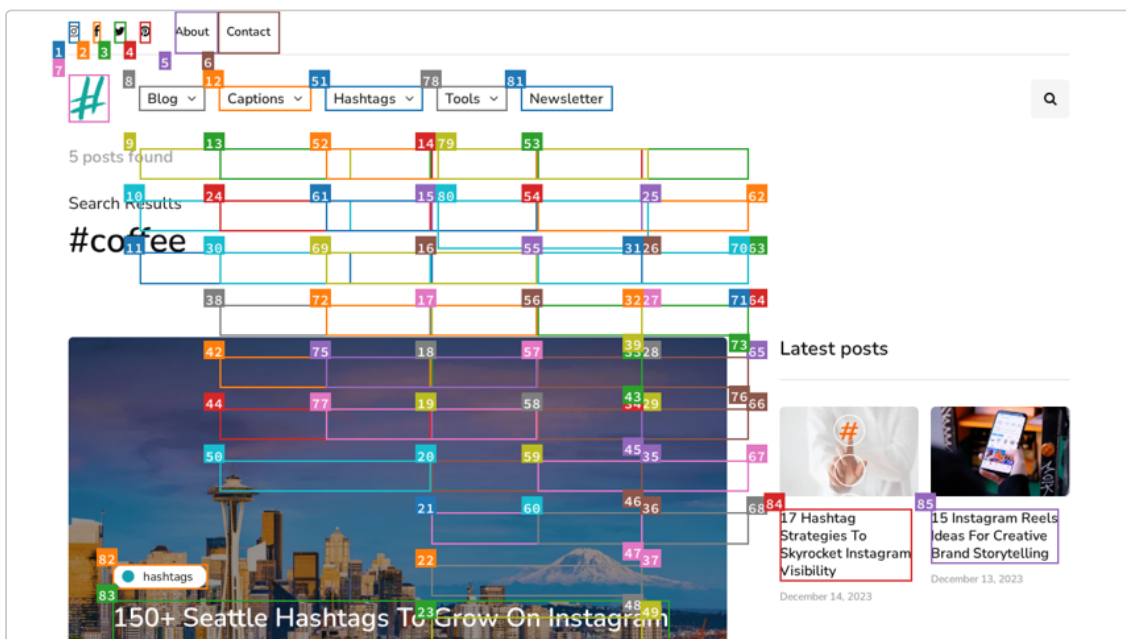



## Response:

To find the top 3 posts for the hashtag "#coffee," I need to interact with the search results displayed on the page. The numbered boxes represent individual posts, and I should focus on identifying the top ones based on their prominence or connections in the network diagram.

**\*\*Reasoning:\*\*** The search results are already displayed, and I need to click on the top posts to gather more information about them. Since the task requires listing the top 3 posts, I'll start by clicking on the most prominent or central post in the network diagram.

**\*\*Action:\*\*** Click on the most prominent post in the search results to view its details.

```
```json
{
  "name": "click",
  "arguments": {
    "element_id": "61",
    "description": "Central post in the network diagram",
    "reasoning": "Clicking on the central post will likely provide details about the top result for #coffee."
  }
}
```
```

**Step 7** (2025-10-08T22:56:51.211334)

## Screenshots:

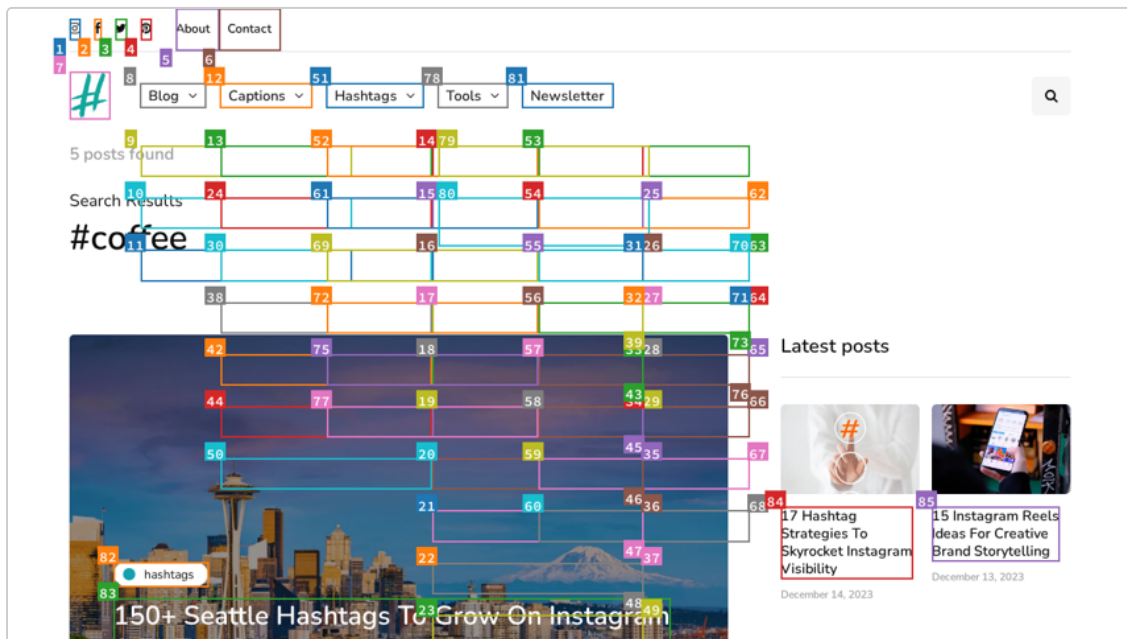

## Response:

To find the top 3 posts for the hashtag "#coffee," I need to interact with the search results or the hashtag visual representation. Since the search results are already displayed, I should focus on identifying the top posts.

Action: Click on the search result or hashtag visual representation to view the top posts.

```
```json
```

```
{
  "name": "click",
  "arguments": {
    "element_id": "16",
    "coords": "200 220",
    "description": "Search result for #coffee",
    "reasoning": "Clicking on the search result will likely display the top posts related to the hashtag."
  }
}
```

}  
...

Step 8 (2025-10-08T22:57:05.864283)

## Screenshots:

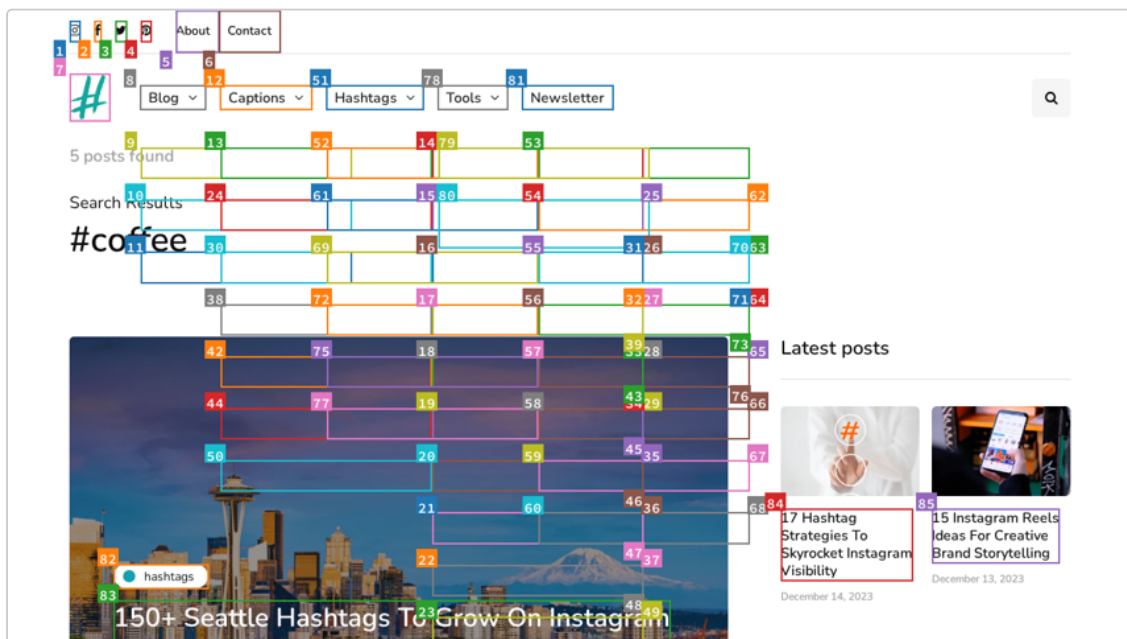

## Response:

To achieve the goal of listing the top 3 posts for the hashtag "#coffee," I need to interact with the search results displayed on the page. The current page shows 5 posts found for "#coffee," and I should focus on identifying and listing the top 3 posts.

### Reasoning:

1. **Identify the search results:** The page already shows the search results for "#coffee," so I don't need to perform a new search.
2. **Locate the top posts:** The top posts are likely listed at the top of the search results section.
3. **Extract the information:** I need to click on the top posts to view their

details or directly list them based on the visible information.

### Action:

Since the search results are already displayed, I will click on the first post to view its details. This will help me gather information about the top posts.

```
```json
{
  "name": "click",
  "arguments": {
    "element_id": "16",
    "description": "First post in the search results for #coffee",
    "reasoning": "I need to click on the first post to view its details and
gather information about the top posts."
  }
}
```
```

**Step 9** (2025-10-08T22:57:18.564573)

## Screenshots:

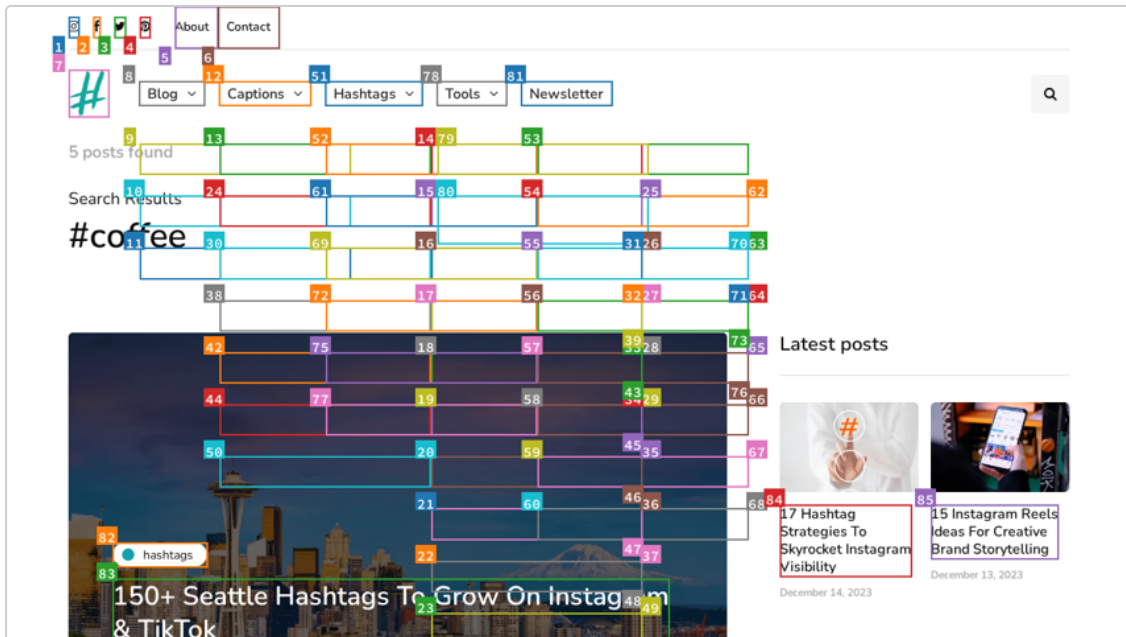

## Response:

To find the top 3 posts for the hashtag "#coffee," I need to interact with the search results or the hashtag visualization. Since the search results are already displayed, I should focus on identifying the top posts.

### ### Reasoning:

The current page shows a hashtag visualization for "#coffee" with 5 posts found. The top posts are likely represented by the most prominent or connected lines in the visualization. I need to click on the hashtag visualization or the search results to view the posts.

### ### Action:

I will click on the hashtag visualization to explore the top posts.

```
```json
```

```
{  
  "name": "click",  
  "arguments": {
```

```

"element_id": "61",
"coords": "360 210",
"description": "Visualization of the #coffee hashtag",
"reasoning": "Clicking on the hashtag visualization will likely lead to the
top posts related to #coffee."
}
}
...

```

## Step 10 (2025-10-08T22:57:29.374357)

### Screenshots:

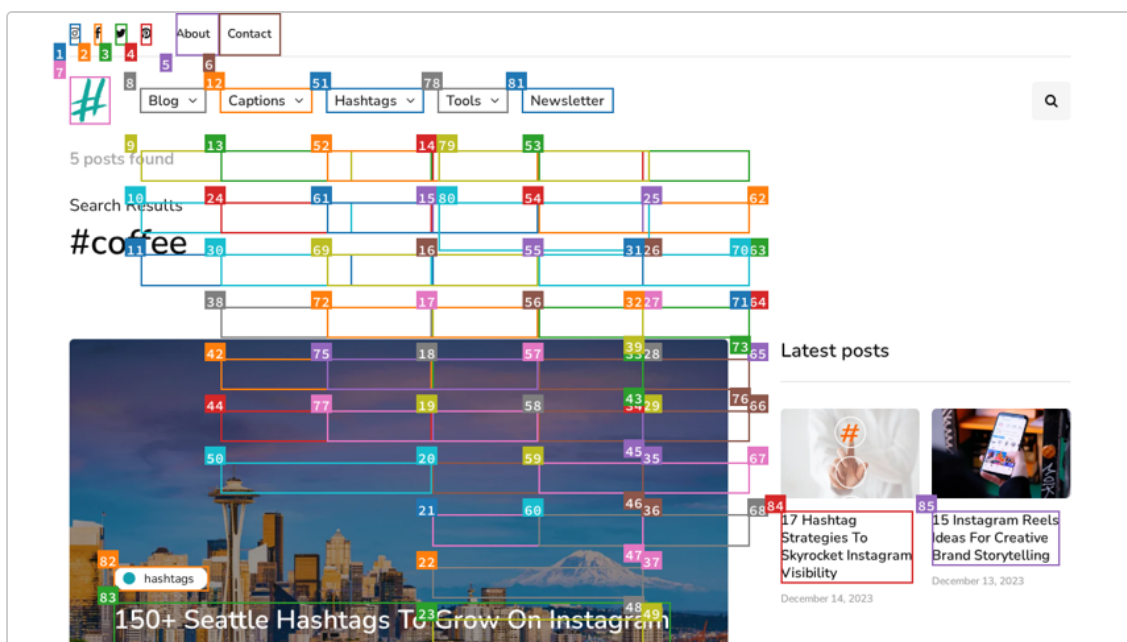

### Response:

```

```json
{
  "name": "stop",
  "arguments": {
    "answer": "The top 3 posts for the hashtag #coffee are represented by

```

the colored boxes with the numbers 10, 24, and 61 in the search results grid. These are the first three results displayed, indicating they are likely the top posts based on the current sorting or relevance criteria.",

"reasoning": "The search results for #coffee are visually represented in a grid format, with each post identified by a numbered box. The top 3 posts are the first three results shown, which are numbered 10, 24, and 61. These are the most relevant or top posts based on the current display."

}

}

...
