# Supplementary material
Source: ML conference proceedings conference paper supplement (https://openreview.net/forum?id=cvAZKWA1HZ)
Supplement: supplementary_material [file finance_tasks_finance_2469.pdf › supplementary_materials/trajectory_evaluation/finance_tasks_finance_2469.pdf]

# Task Report

Session ID: finance\_tasks\_finance\_2469

Task Description: Find the current price of Binance Coin (BNB).

Total Rounds: 8

Step 1 (2025-09-17T21:59:57.924867)

## Screenshots:

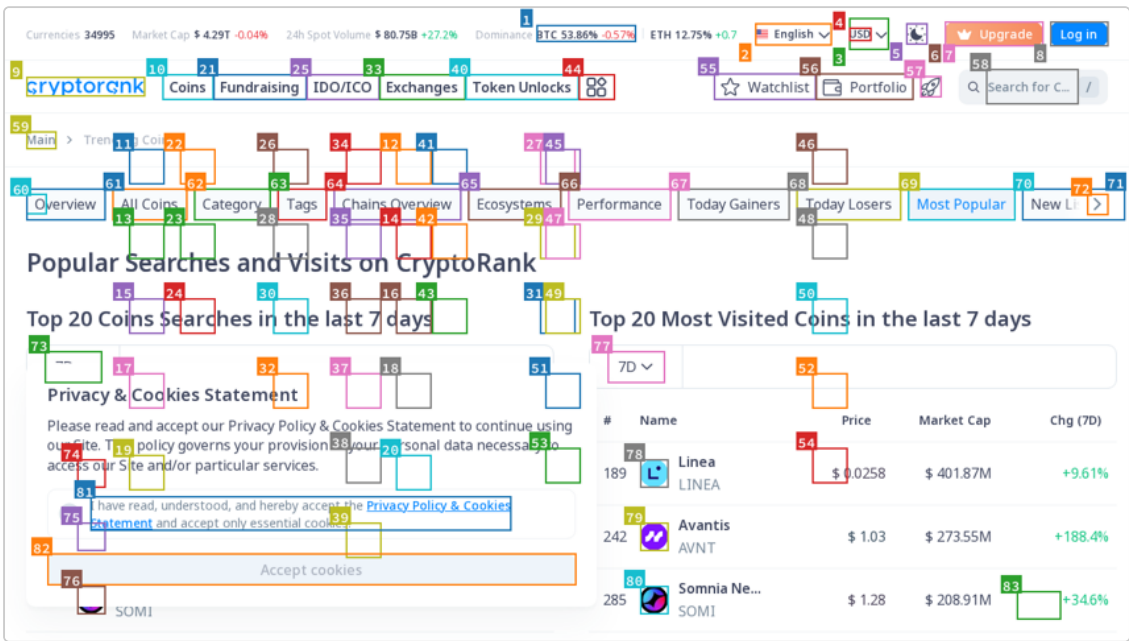

## Response:

To find the current price of Binance Coin (BNB), I'll start by using the search functionality on the CryptoRank homepage. This will allow me to quickly locate the specific information I need.

**\*\*Action:\*\***

```json

```
{
  "name": "type",
  "arguments": {
    "text": "Binance Coin",
    "element_id": "11",
    "field_description": "search input field",
    "reasoning": "I need to search for Binance Coin to find its current price"
  }
}
```

## Step 2 (2025-09-17T22:00:10.970000)

### Screenshots:

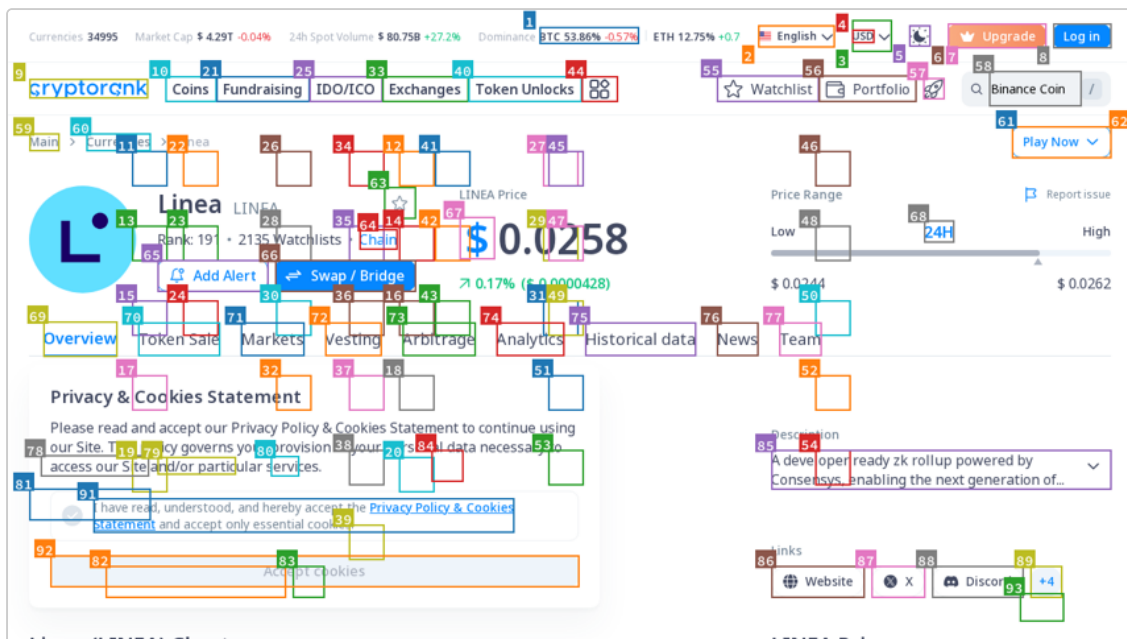

## Response:

To find the current price of Binance Coin (BNB), I need to navigate to the relevant section or perform a search for Binance Coin on this website. Since there is a search bar available, I will use it to search for "Binance Coin."

Action:

```
```json
{
  "name": "type",
  "arguments": {
    "text": "Binance Coin",
    "element_id": "58",
    "field_description": "search input field",
    "reasoning": "I need to search for Binance Coin information"
  }
}
```
```

**Step 3 (2025-09-17T22:00:24.044487)**

## Screenshots:

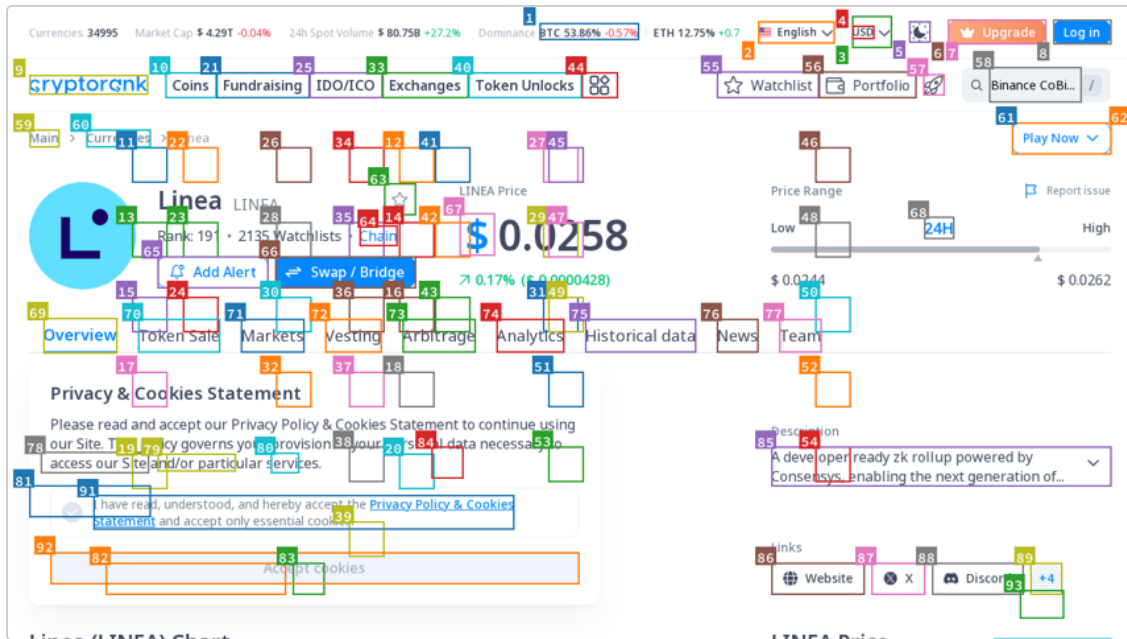

## Response:

To find the current price of Binance Coin (BNB), I need to navigate away from the LINEA token page and search for BNB instead. The search bar at the top of the page is the most logical place to start this process.

**\*\*Action:\*\***

```json

```
{
  "name": "type",
  "arguments": {
    "text": "BNB",
    "element_id": "58",
    "field_description": "search input field",
    "reasoning": "I need to search for Binance Coin (BNB) information"
  }
}
```

## Screenshots:

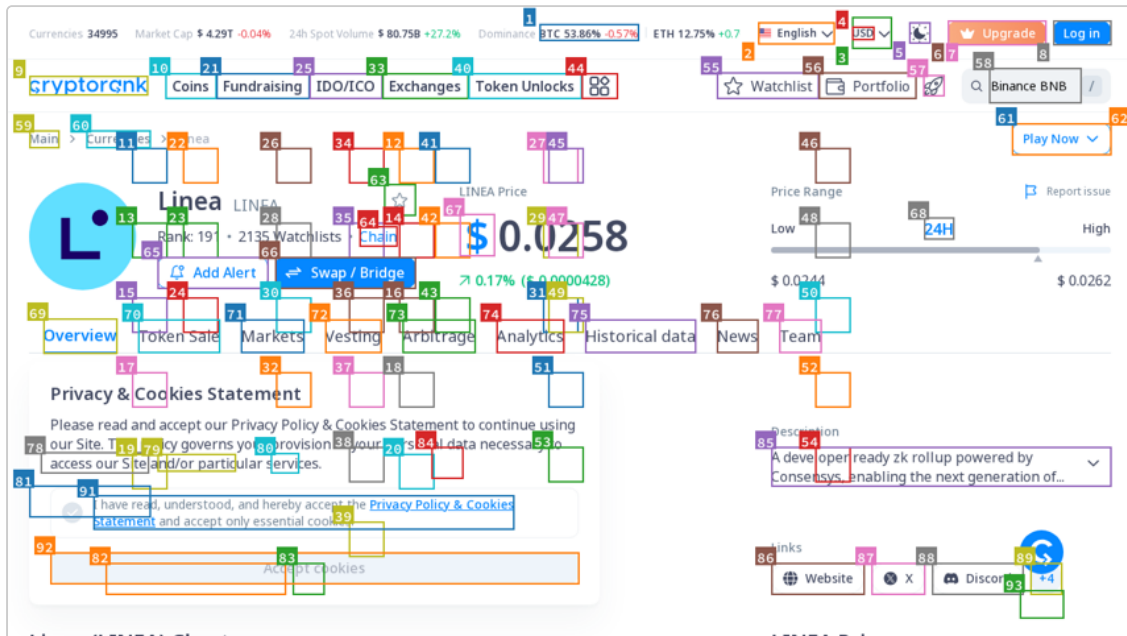

## Response:

To find the current price of Binance Coin (BNB), I'll start by navigating to the relevant section where cryptocurrency prices are listed. Since the current page is focused on the LINEA token, I need to return to the main page or search for BNB directly.

### ### Reasoning:

1. The top navigation bar includes a link labeled "Coins," which is likely where I can find a list of all cryptocurrencies, including Binance Coin (BNB).
2. Clicking on the "Coins" link should take me to a page where I can either search for BNB or browse the list to locate it.

### ### Action:

I will click on the "Coins" link in the top navigation bar to proceed to the page where I can find the price of Binance Coin (BNB).

```

```json
{
  "name": "click",
  "arguments": {
    "element_id": "21",
    "description": "Coins link in the top navigation bar",
    "reasoning": "Clicking on the Coins link will navigate to the page where I can search for or find Binance Coin (BNB)."
  }
}
```

```

## Step 5 (2025-09-17T22:00:51.392692)

### Screenshots:

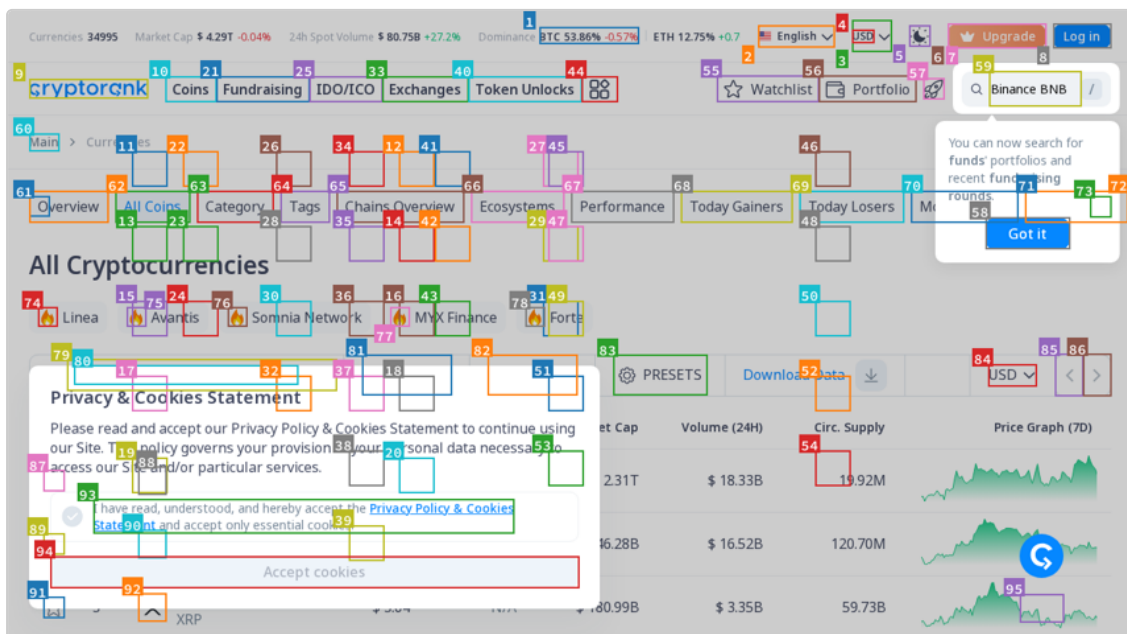

## Response:

To find the current price of Binance Coin (BNB), I'll start by searching for it in the search bar.

Action:

```
```json
{
  "name": "type",
  "arguments": {
    "text": "Binance Coin",
    "element_id": "11",
    "field_description": "search input field",
    "reasoning": "I need to search for Binance Coin to find its current price"
  }
}
```
```

**Step 6** (2025-09-17T22:01:03.858903)

Screenshots:

1

2

3

4

5

6

7

8

9

10

11

12

13

14

15

16

17

18

19

20

21

22

23

| #  | Name             | Price     | Chg (24H) | Market Cap | Volume (24H) | Circ. Supply | Price Graph (7D) |
|----|------------------|-----------|-----------|------------|--------------|--------------|------------------|
| 3  | XRP              | \$ 3.03   | -0.05%    | \$ 180.99B | \$ 3.33B     | 59.73B       |                  |
| 4  | Tether USDT      | \$ 1.00   | +0.01%    | \$ 171.00B | \$ 55.52B    | 170.95B      |                  |
| 5  | BNB BNB          | \$ 961.58 | +0.66%    | \$ 140.21B | \$ 1.24B     | 145.89M      |                  |
| 6  | Solana SOL       | \$ 240.33 | +0.84%    | \$ 130.08B | \$ 5.37B     | 543.00M      |                  |
| 7  | USDC USDC        | \$ 1.000  | -0.01%    | \$ 73.63B  | \$ 11.19B    | 73.65B       |                  |
| 12 | Dogecoin         | \$ 0.0888 | +0.01%    | \$ 41.27B  | \$ 2.18B     | 150.98B      |                  |
| 18 | Cardano ADA      | \$ 0.429B | +0.01%    | \$ 35.28M  | \$ 8.61M     | 36.52B       |                  |
| 20 | Hyperliquid HYPE | \$ 56.95  | +4.89%    | \$ 18.84B  | \$ 608.90M   | 333.93M      |                  |

Privacy & Cookies Statement

Please read and accept our Privacy Policy & Cookies Statement to continue using our Site. This policy governs your provision of your personal data necessary to access our Site and/or particular services.

Have read, understood, and hereby accept the Privacy Policy & Cookies Statement and accept only essential cookies.

Accept cookies

Response:

```
```json
{
  "name": "click",
  "arguments": {
    "element_id": "6",
    "description": "BNB row in the table",
    "reasoning": "Click on the BNB row to focus on its details and confirm the current price."
  }
}
```



## Screenshots:

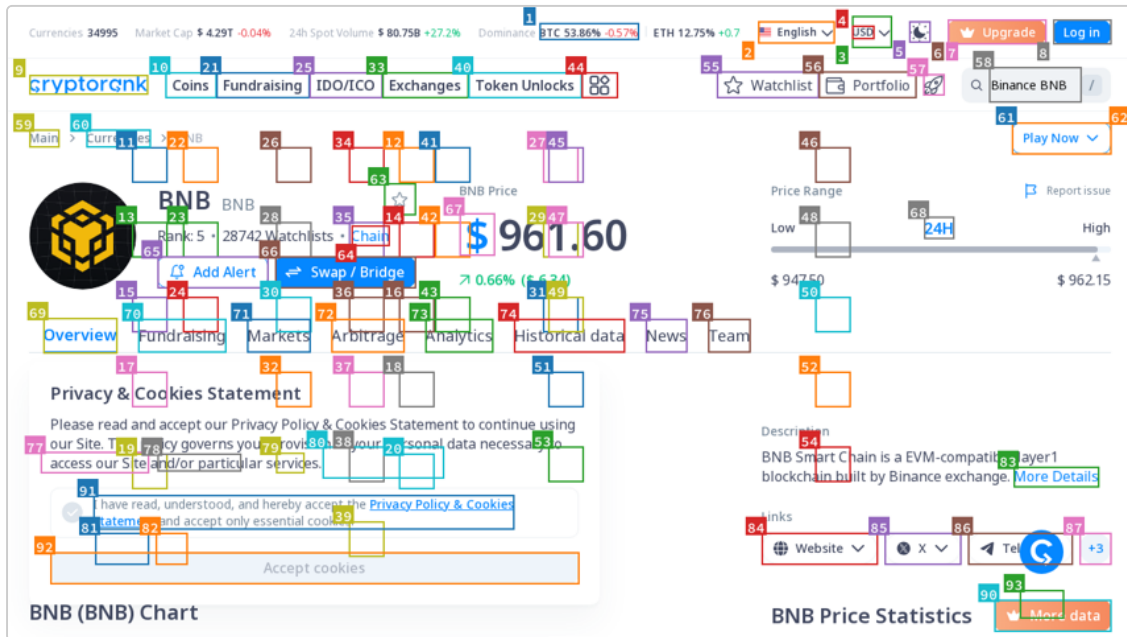

## Response:

```
```json
{
  "name": "click",
  "arguments": {
    "element_id": "60",
    "description": "element containing the BNB price",
    "reasoning": "The current BNB price is clearly visible in the center of the screen, labeled as '$961.60'. Clicking this area will ensure we confirm the price information."
  }
}
```
```

Step 8 (2025-09-17T22:01:26.652179)

## Screenshots:

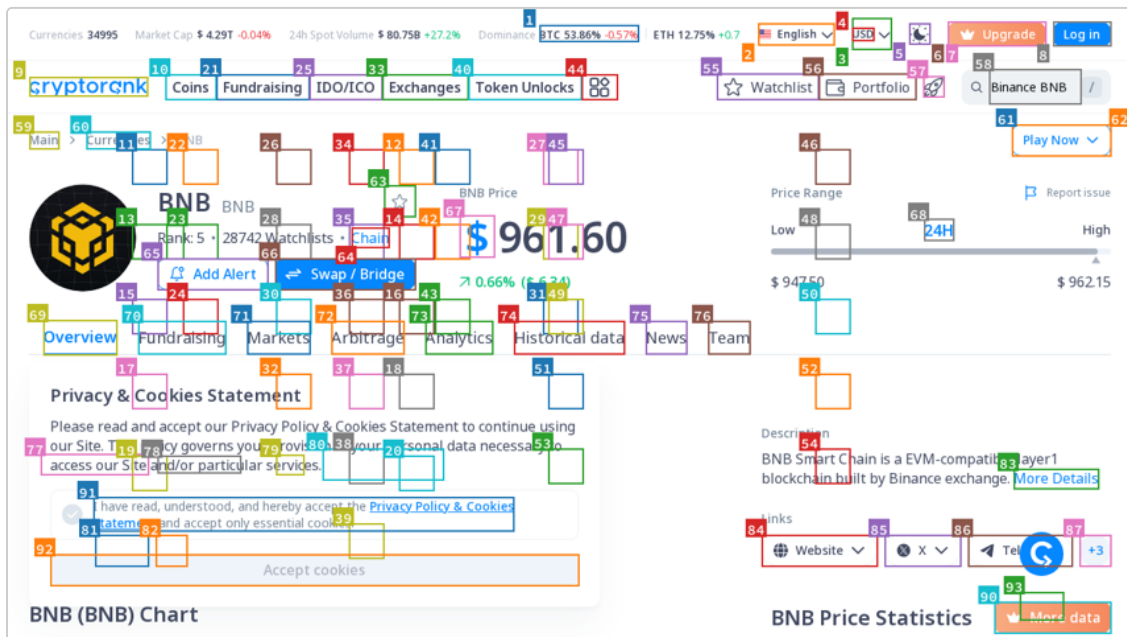

## Response:

The current price of Binance Coin (BNB) is displayed prominently on the screen as **\$961.60**. This information is clearly visible without needing to perform any additional actions.

**\*\*Action:\*\***

**```json**

```
{
  "name": "stop",
  "arguments": {
    "answer": "The current price of Binance Coin (BNB) is $961.60.",
    "reasoning": "The price is clearly displayed on the screen, and no further actions are required to obtain this information."
  }
}
```

**```**
