# Supplementary material
Source: ML conference proceedings conference paper supplement (https://openreview.net/forum?id=cvAZKWA1HZ)
Supplement: supplementary_material [file food_tasks_food_13.pdf › supplementary_materials/trajectory_evaluation/food_tasks_food_13.pdf]

# Task Report

**Session ID:** food\_tasks\_food\_13

**Task Description:** Could you help me make Southern Cornmeal Hushpuppies?

**Total Rounds:** 8

## Step 1 (2025-09-14T22:25:49.670535)

### Screenshots:

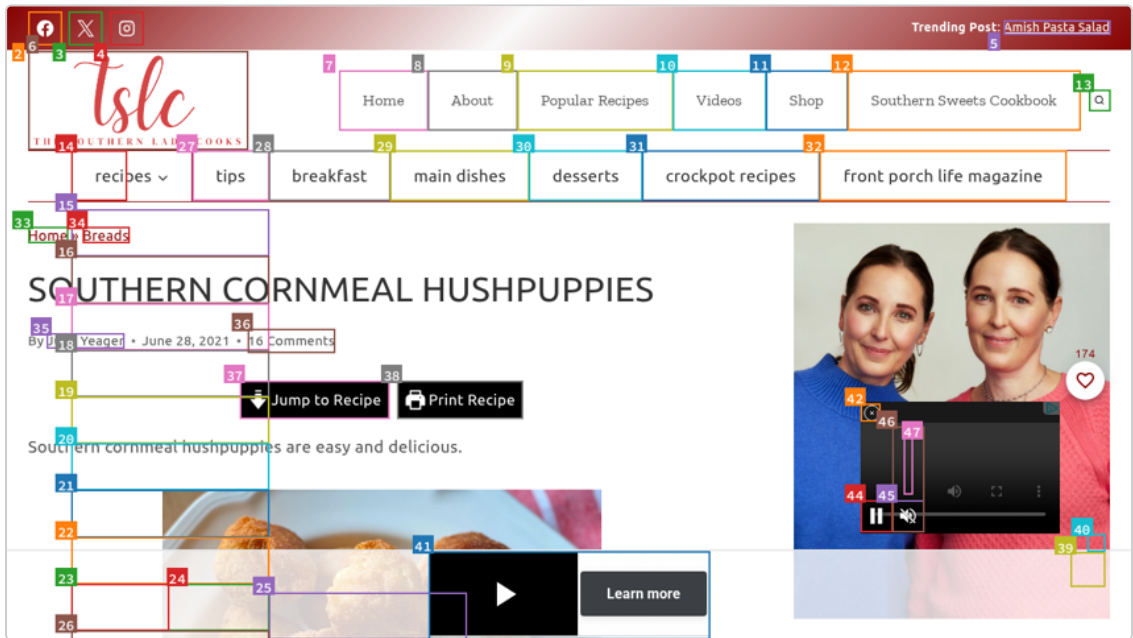

### Response:

To proceed with making Southern Cornmeal Hushpuppies, we need to access the recipe details. The most direct way to achieve this is by

clicking the "Jump to Recipe" button, which will likely lead us to the full recipe instructions.

**\*\*Action:\*\***

```json

```
{
  "name": "click",
  "arguments": {
    "element_id": "37",
    "description": "Jump to Recipe button",
    "reasoning": "Clicking this will navigate to the full recipe details needed to make Southern Cornmeal Hushpuppies."
  }
}
```

## Step 2 (2025-09-14T22:26:00.695390)

### Screenshots:

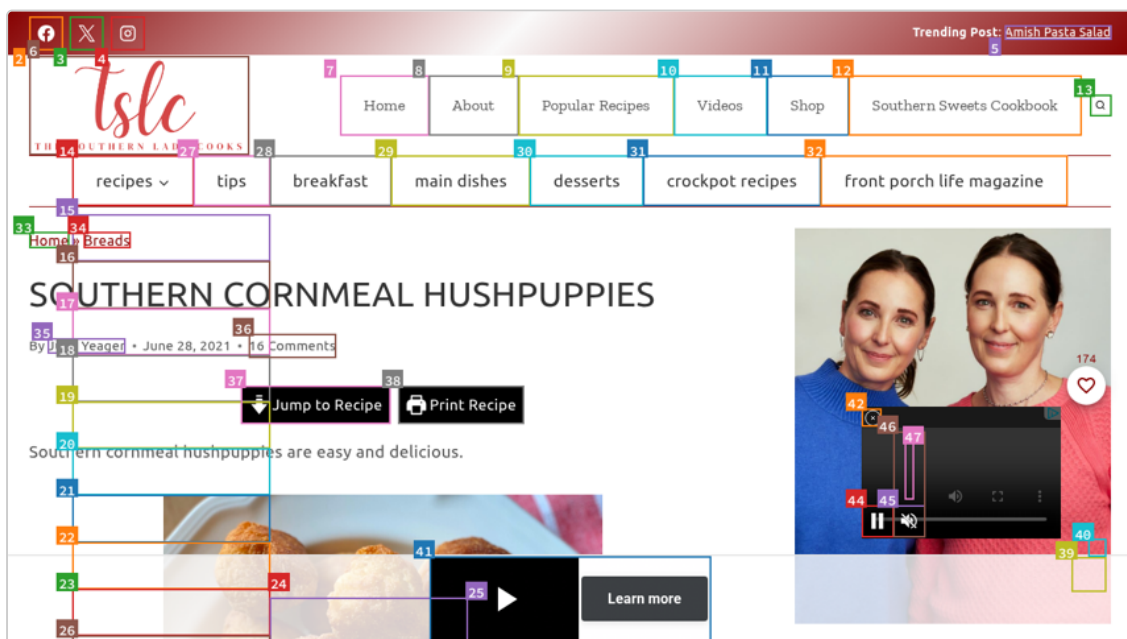

## Response:

To proceed with finding the recipe for Southern Cornmeal Hushpuppies, let's click the "Jump to Recipe" button to access the detailed instructions.

```
```json
{
  "name": "click",
  "arguments": {
    "element_id": "37",
    "description": "Jump to Recipe button",
    "reasoning": "Clicking this will take us directly to the recipe details."
  }
}
```
```

## Step 3 (2025-09-14T22:26:11.823329)

## Screenshots:

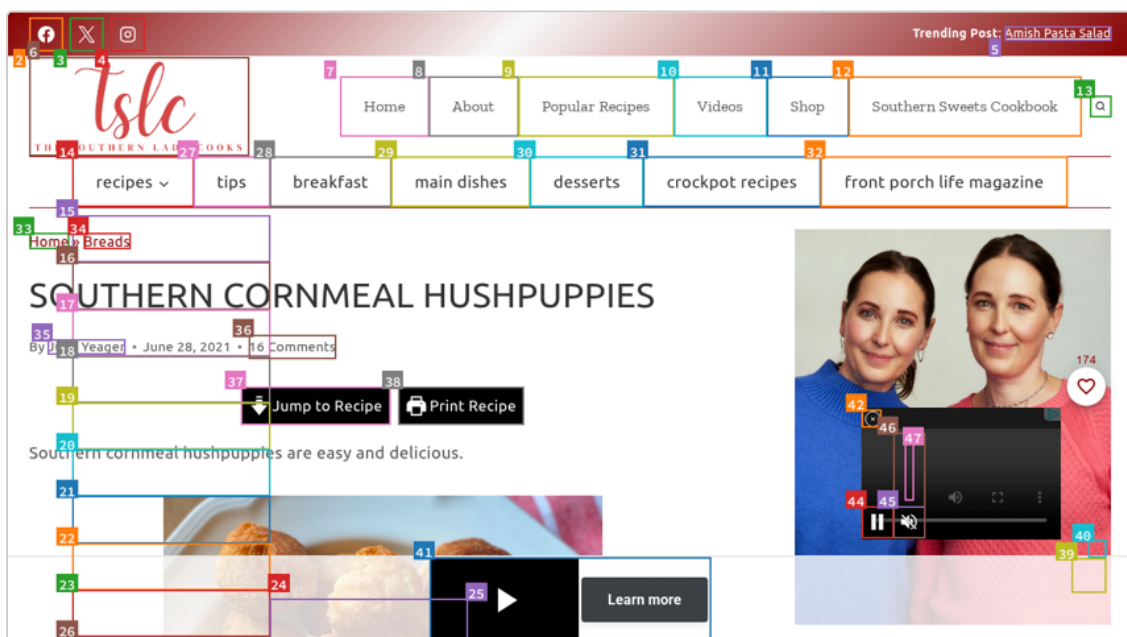

## Response:

To proceed with making Southern Cornmeal Hushpuppies, we need to access the full recipe. The most direct way to achieve this is by clicking the "Jump to Recipe" button, which will take us to the detailed instructions.

Action:

```
```json
```

```
{  
  "name": "click",  
  "arguments": {  
    "element_id": "37",  
    "description": "Jump to Recipe button",  
    "reasoning": "Clicking this button will lead to the full recipe details  
needed to make Southern Cornmeal Hushpuppies."  
  }  
}  
```
```

**Step 4** (2025-09-14T22:26:22.069341)

## Screenshots:

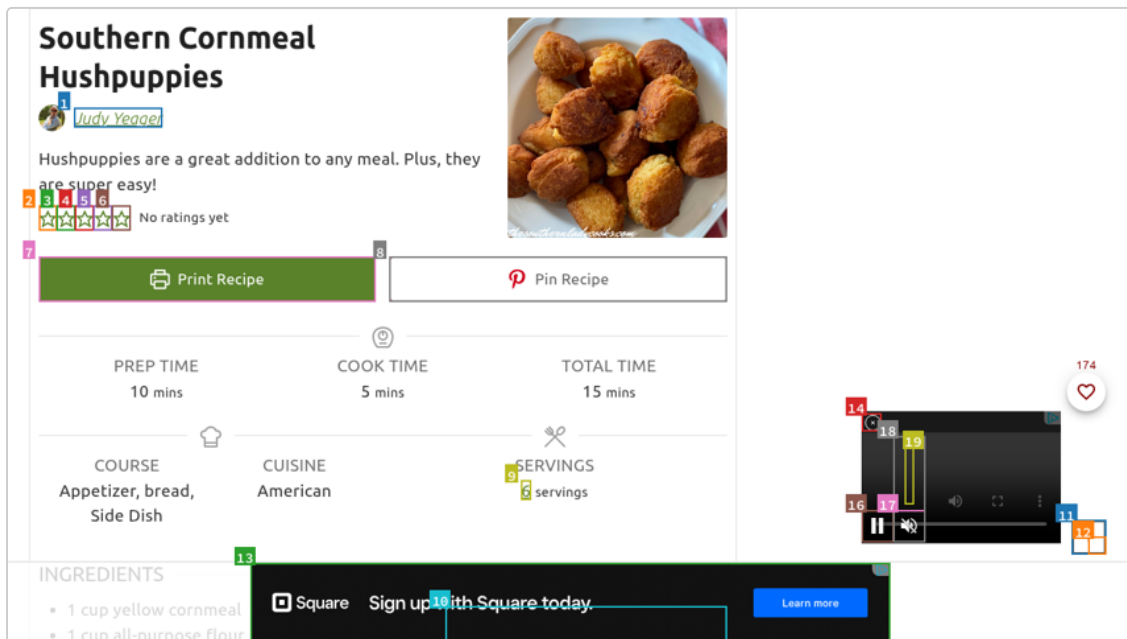

## Response:

To make Southern Cornmeal Hushpuppies, we need to gather the full list of ingredients and detailed instructions. Since the image shows only the top portion of the recipe page, we'll need to scroll down to view the complete recipe details.

**\*\*Action:\*\***

```json

```
{
  "name": "scroll",
  "arguments": {
    "direction": "down",
    "reasoning": "Scroll down to view the full list of ingredients and instructions for making Southern Cornmeal Hushpuppies."
  }
}
```

## Screenshots:

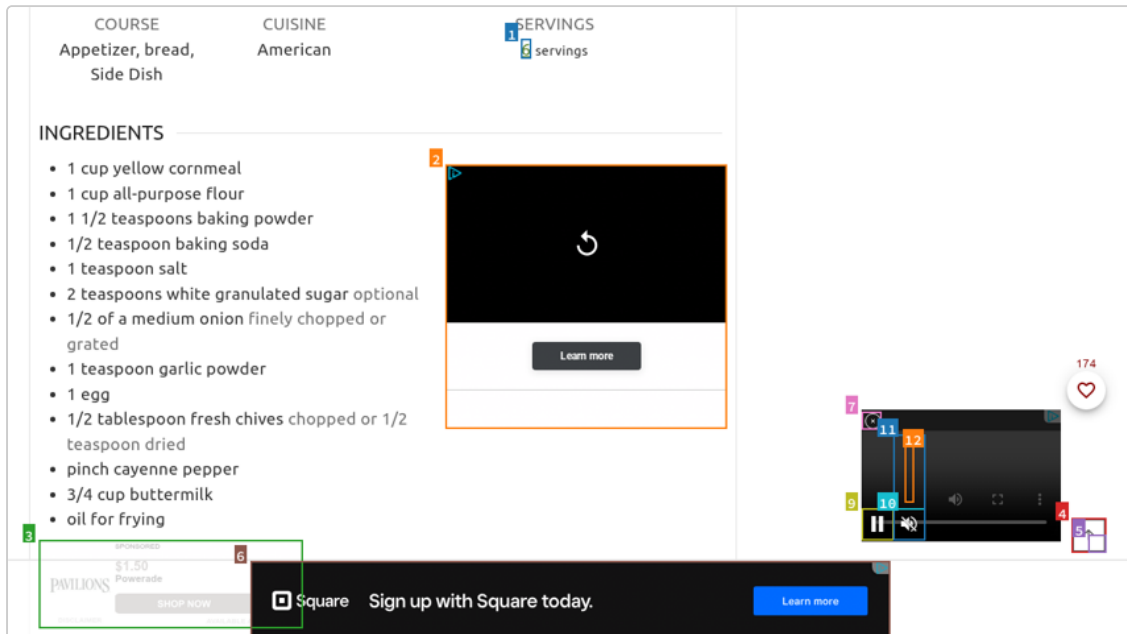

## Response:

To proceed with making Southern Cornmeal Hushpuppies, let's ensure we have all the necessary information. Since the current view shows the ingredients and some interactive elements, my next step will be to explore further details or instructions that might be below the fold.

Action:

```json

```
{
  "name": "scroll",
  "arguments": {
    "direction": "down",
    "reasoning": "Scrolling down to reveal more details or instructions about making Southern Cornmeal Hushpuppies"
  }
}
```

}  
...

## Step 6 (2025-09-14T22:26:44.735660)

### Screenshots:

Ingredients:

- 3/4 cup buttermilk
- oil for frying

**1**

**SPONSORED**  
\$1.50  
**PAVILIONS** Powerade  
SHOP NOW  
DISCLAIMER AVAILABLE AT PAVILIONS

**INSTRUCTIONS**

1. Combine all ingredients in a large bowl. Mix with spoon. The batter should be just wet enough that you can shape it into balls about the size of a walnut with your hands and it sticks together.
2. Have oil hot in a skillet and drop hushpuppies **2** into oil. Cook about 3 to 4 minutes browning on all sides. Remove and drain on paper towels.

**NOTES**

This makes about 20 to 24 hushpuppies. You can double or triple the recipe.

**5**

**KEYWORD**  
Southern Cornmeal Hush  
south

**6** **16** **11** **8** **5** **3** **174**

**Learn more**

**Learn more**

**Square** Sign up with Square today. **Learn more**

### Response:

To make Southern Cornmeal Hushpuppies, let's follow the provided instructions step by step. Since we already have the recipe and instructions visible, we can proceed to the next logical step, which is to ensure we understand the process fully before attempting to make the dish.

#### ### Reasoning:

The instructions are clearly laid out, and there is a video player embedded, which could provide a visual guide to making the hushpuppies. Watching the video might help clarify any doubts or nuances in the preparation process.

### Action:

Let's click on the video player to watch the tutorial, ensuring we have a comprehensive understanding of the steps involved.

```
```json
{
  "name": "click",
  "arguments": {
    "element_id": "2",
    "coords": "650 460",
    "description": "Video player with play button",
    "reasoning": "Watching the video will provide a visual guide to making Southern Cornmeal Hushpuppies"
  }
}
```
```

**Step 7 (2025-09-14T22:26:56.364680)**



## Screenshots:

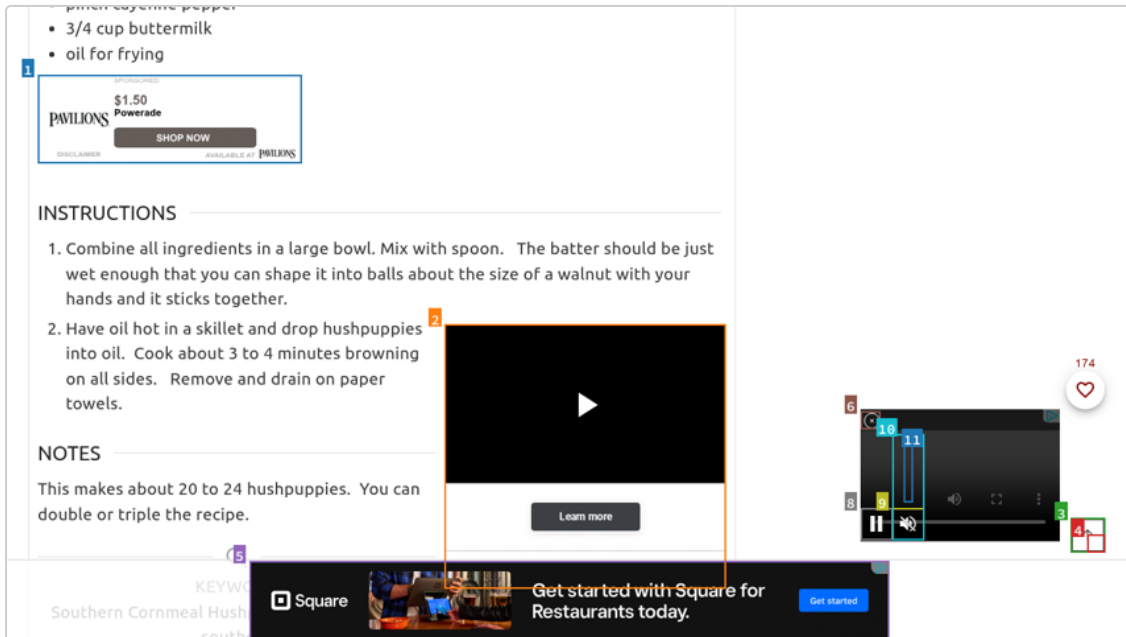

## Response:

To make Southern Cornmeal Hushpuppies, let's follow the provided instructions step by step. Since the instructions are already visible, we can proceed with understanding them and potentially accessing additional resources if needed.

### ### Reasoning:

The instructions are clearly laid out, but there might be additional helpful information or visuals available via the video overlay or other sections of the page. Let's explore these options to ensure we have all the necessary guidance.

### ### Action:

Since the video player is present, it could offer a visual guide to making hushpuppies. Clicking the video to start playing might provide additional insights or confirmations.

```json

```
{
  "name": "click",
  "arguments": {
    "element_id": "2",
    "coords": "660 450",
    "description": "Play button of the video overlay",
    "reasoning": "Clicking the video will provide a visual guide to making hushpuppies, complementing the written instructions."
  }
}
...
```

## Step 8 (2025-09-14T22:27:09.851597)

### Screenshots:

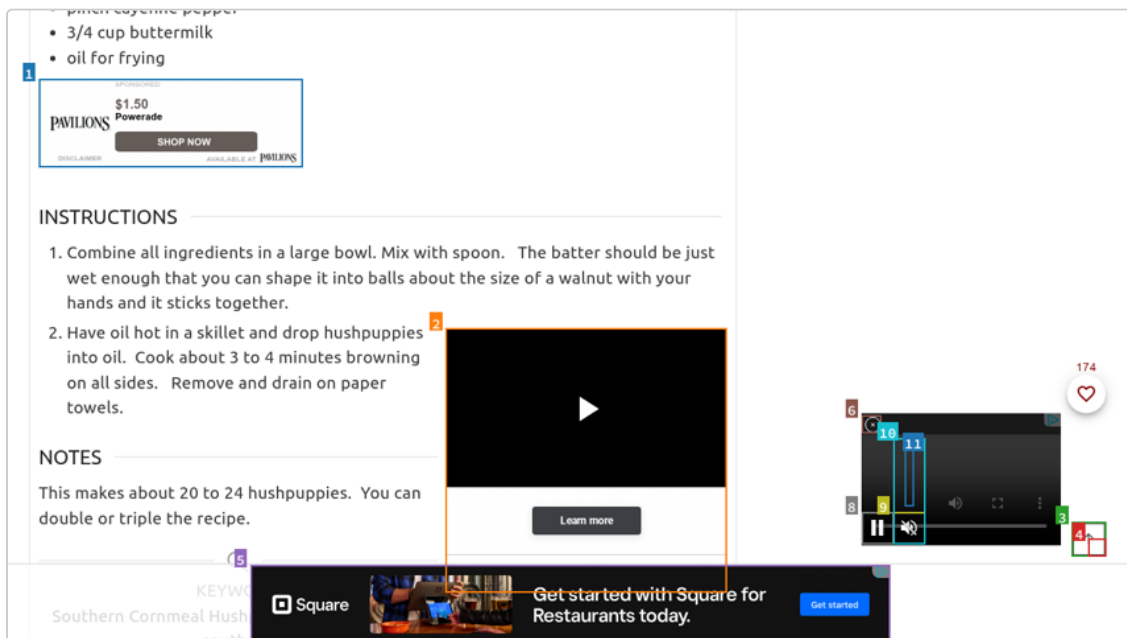

### Response:

To proceed with making Southern Cornmeal Hushpuppies, let's follow the instructions provided in the image:

### ### Reasoning:

The instructions are clearly laid out, and we need to ensure we understand each step. Since the question asks for guidance on making the dish, we can confirm the steps and ensure clarity.

### ### Action:

Since the instructions are already visible, we don't need to perform any further actions to gather information. We can now summarize the steps and stop the process.

```
```json
{
  "name": "stop",
  "arguments": {
    "answer": "To make Southern Cornmeal Hushpuppies, follow these steps:\n1. Combine all ingredients in a large bowl and mix with a spoon until the batter is just wet enough to form walnut-sized balls that stick together.\n2. Heat oil in a skillet and drop the hushpuppy balls into the oil. Cook for about 3-4 minutes, turning to brown on all sides. Remove and drain on paper towels.\nThis recipe makes about 20-24 hushpuppies, and you can double or triple the recipe as needed.",
    "reasoning": "The instructions for making Southern Cornmeal Hushpuppies are clearly provided in the image, and no further actions are required to gather the necessary information."
  }
}
```
```
