# Supplementary material
Source: ML conference proceedings conference paper supplement (https://openreview.net/forum?id=cvAZKWA1HZ)
Supplement: supplementary_material [file food_tasks_food_1494.pdf › supplementary_materials/trajectory_evaluation/food_tasks_food_1494.pdf]

# Task Report

**Session ID:** food\_tasks\_food\_1494

**Task Description:** Please open the "Recipe Index" dropdown menu.

**Total Rounds:** 6

**Step 1** (2025-09-19T04:36:59.984344)

## Screenshots:

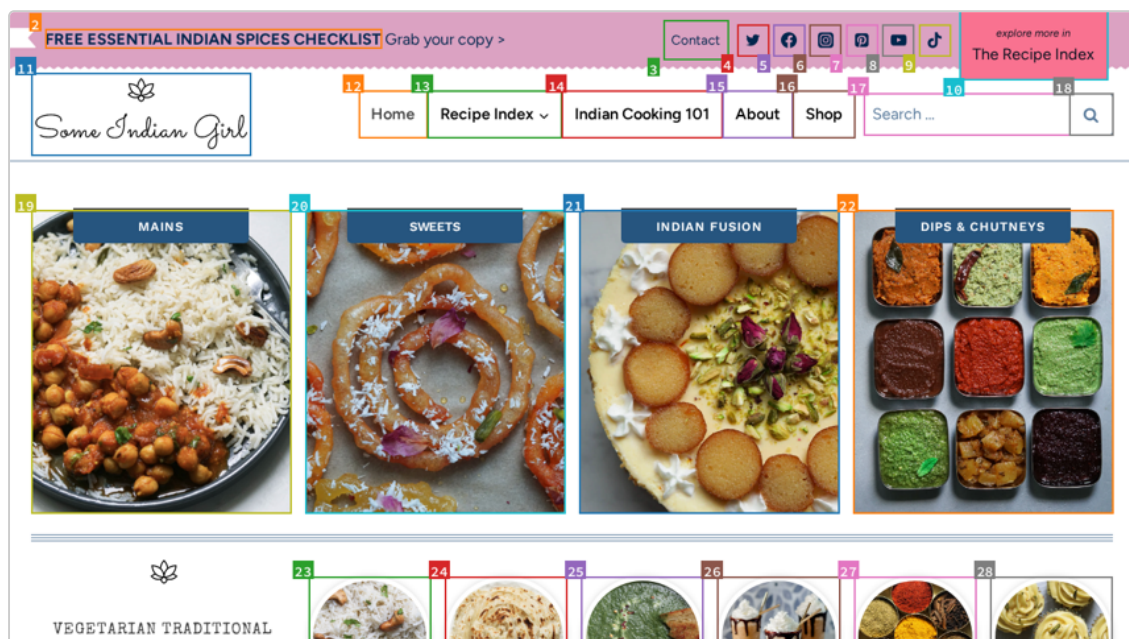

## Response:

To achieve the goal of opening the "Recipe Index" dropdown menu, I need to click on the "Recipe Index" link in the navigation menu. This will likely expand the dropdown and reveal more options or categories under the

## Recipe Index.

Action:

```
``json
```

```
{  
  "name": "click",  
  "arguments": {  
    "element_id": "14",  
    "description": "Recipe Index dropdown menu",  
    "reasoning": "Clicking on the 'Recipe Index' link will open the dropdown  
menu to explore more recipe categories"  
  }  
}
```

## Step 2 (2025-09-19T04:37:11.603882)

### Screenshots:

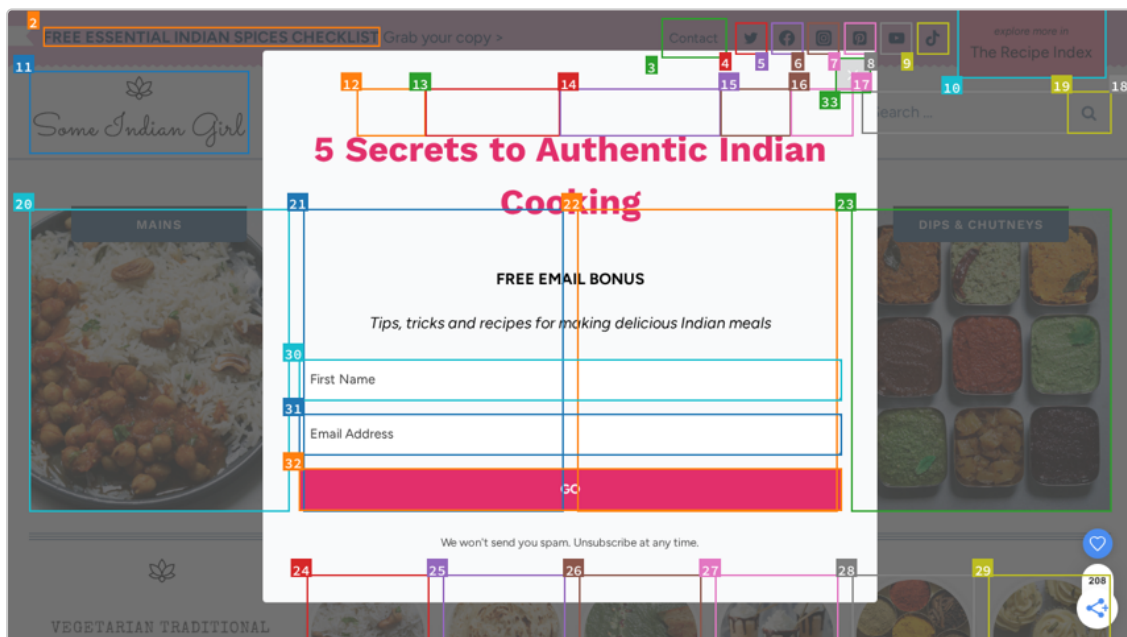

## Response:

To achieve the goal of opening the "Recipe Index" dropdown menu, I need to locate and interact with the relevant element. Based on the provided screenshot, the "Recipe Index" is visible near the top-right area of the page.

### ### Reasoning:

1. The "Recipe Index" text is located near the top-right corner of the page.
2. It appears to be a clickable element, likely a dropdown menu or link.
3. To proceed, I need to click on this element to open the dropdown menu.

### ### Action:

I will click on the "Recipe Index" element to open the dropdown menu.

```
```json
{
  "name": "click",
  "arguments": {
    "element_id": "19",
    "description": "Recipe Index dropdown menu",
    "reasoning": "Clicking this element will open the Recipe Index dropdown menu as required by the task."
  }
}
```
```

**Step 3** (2025-09-19T04:37:23.267042)

## Screenshots:

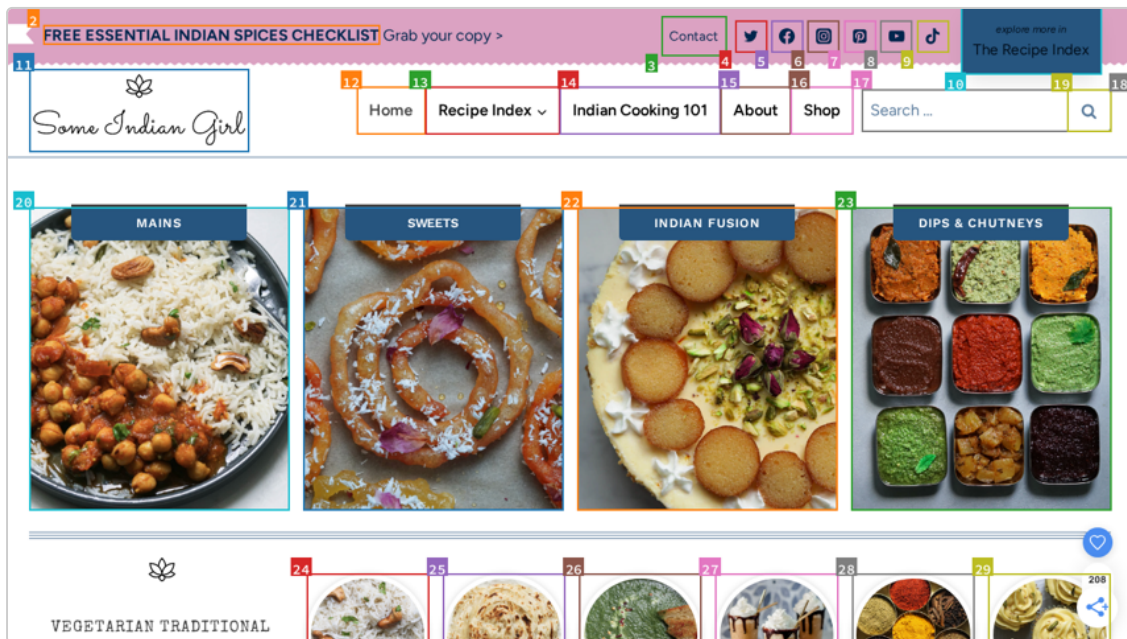

## Response:

```
```json
{
  "name": "click",
  "arguments": {
    "element_id": "13",
    "description": "Recipe Index dropdown menu",
    "reasoning": "To open the Recipe Index dropdown menu and explore available recipes"
  }
}
```
```

Step 4 (2025-09-19T04:37:34.729932)

## Screenshots:



## Response:

To open the "Recipe Index" dropdown menu, I need to click on the "Recipe Index" link in the navigation bar. This will likely reveal additional options or categories under the Recipe Index section.

Action:

```
```json
```

```
{
  "name": "click",
  "arguments": {
    "element_id": "15",
    "description": "Recipe Index dropdown menu",
    "reasoning": "Clicking on the 'Recipe Index' link will open the dropdown menu to explore available recipes."
  }
}
```

## Screenshots:

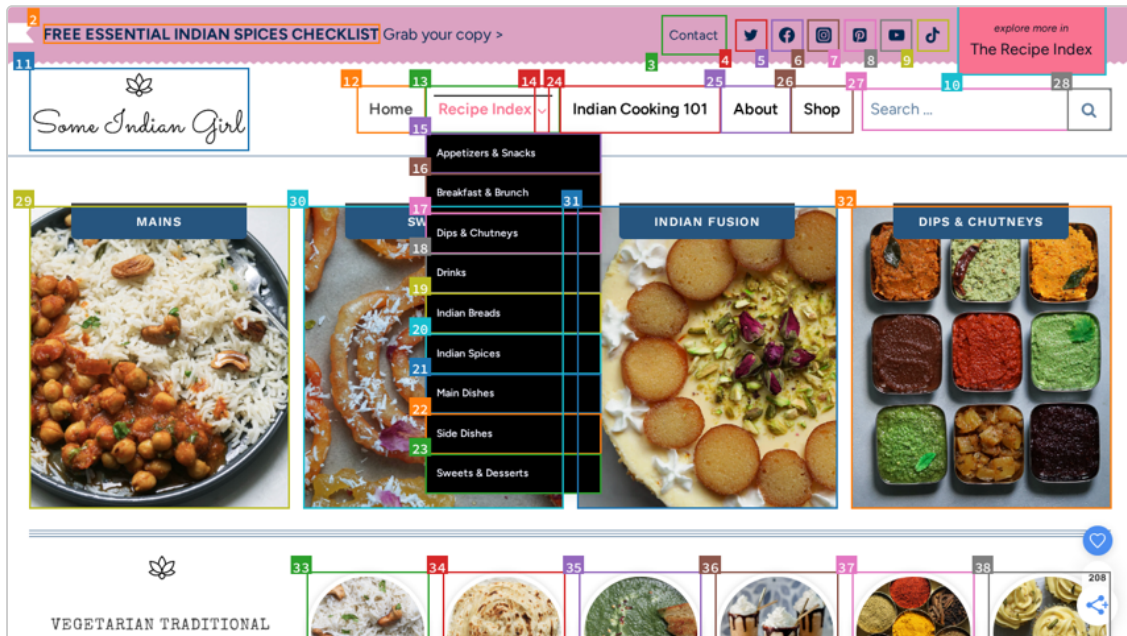

## Response:

```
```json
{
  "name": "click",
  "arguments": {
    "element_id": "14",
    "description": "Recipe Index dropdown menu",
    "reasoning": "To open the Recipe Index dropdown menu and view available recipe categories"
  }
}
```
```



## Screenshots:

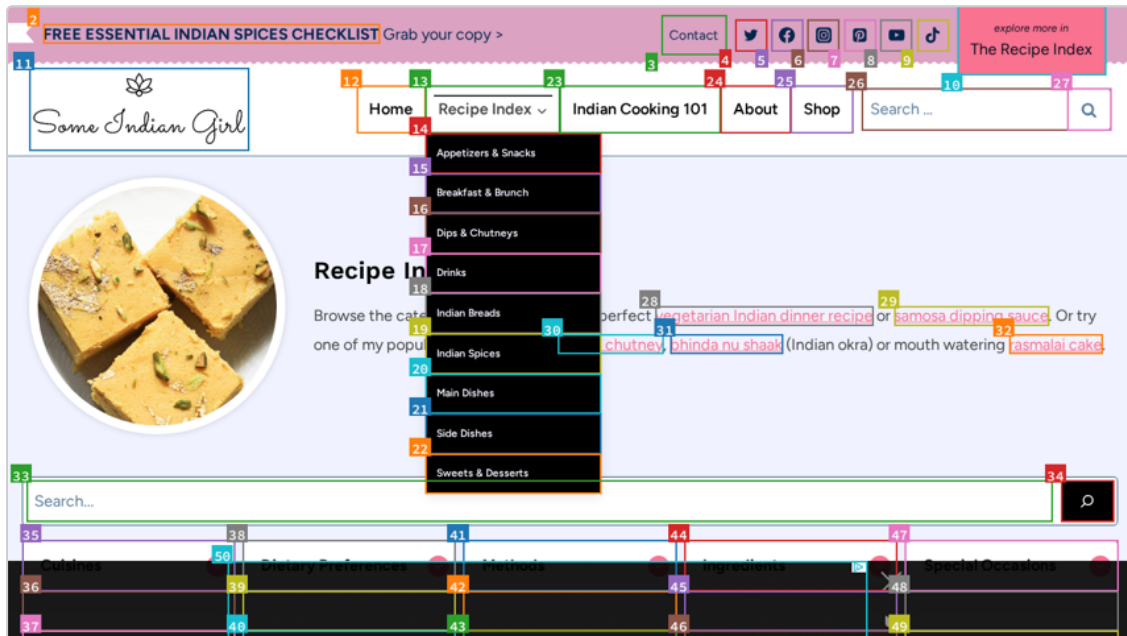

## Response:

Since the "Recipe Index" dropdown menu is already open, showing various recipe categories, the task of opening the dropdown menu is complete. There is no need for further action regarding this specific instruction.

**\*\*Action:\*\***

**```json**

```
{
  "name": "stop",
  "arguments": {
    "answer": "The 'Recipe Index' dropdown menu is already open, displaying various recipe categories.",
    "reasoning": "The task of opening the 'Recipe Index' dropdown menu has been successfully completed as it is currently visible on the screen."
  }
}
```

```
}  
...
```
