# Supplementary material
Source: ML conference proceedings conference paper supplement (https://openreview.net/forum?id=cvAZKWA1HZ)
Supplement: supplementary_material [file food_tasks_food_V1_new_160.pdf › supplementary_materials/trajectory_evaluation/food_tasks_food_V1_new_160.pdf]

# Task Report

**Session ID:** food\_tasks\_food\_V1\_new\_160

**Task Description:** Compare the prices of three different models of FOTILE cooktops

**Total Rounds:** 6

**Step 1** (2025-10-08T04:20:26.852019)

## Screenshots:

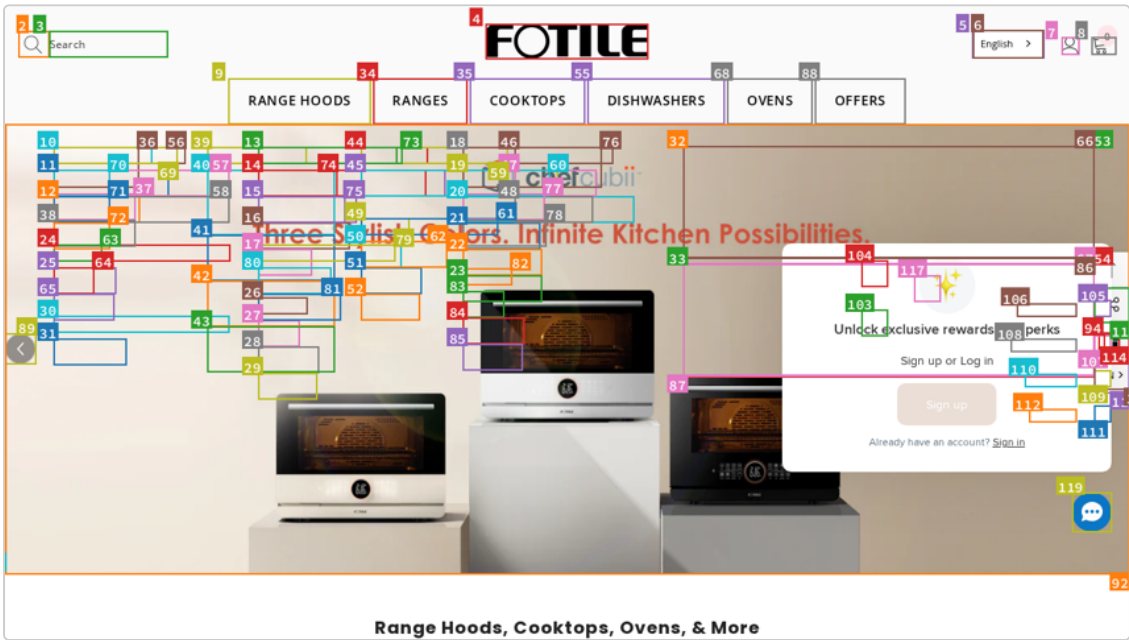

## Response:

To compare the prices of three different models of FOTILE cooktops, I need to navigate to the "COOKTOPS" section of the website. This will

allow me to view the available cooktop models and their prices.

**\*\*Reasoning:\*\*** The top navigation bar includes a link labeled "COOKTOPS" (element\_id: 55), which is likely the section where I can find information about cooktops, including their prices. Clicking this link will help me access the relevant page to start comparing the prices.

**\*\*Action:\*\*** Click on the "COOKTOPS" link in the navigation bar.

```
```json
{
  "name": "click",
  "arguments": {
    "element_id": "55",
    "description": "COOKTOPS link in the navigation bar",
    "reasoning": "I need to navigate to the cooktops section to find and compare prices."
  }
}
```
```

**Step 2 (2025-10-08T04:20:48.356154)**

## Screenshots:

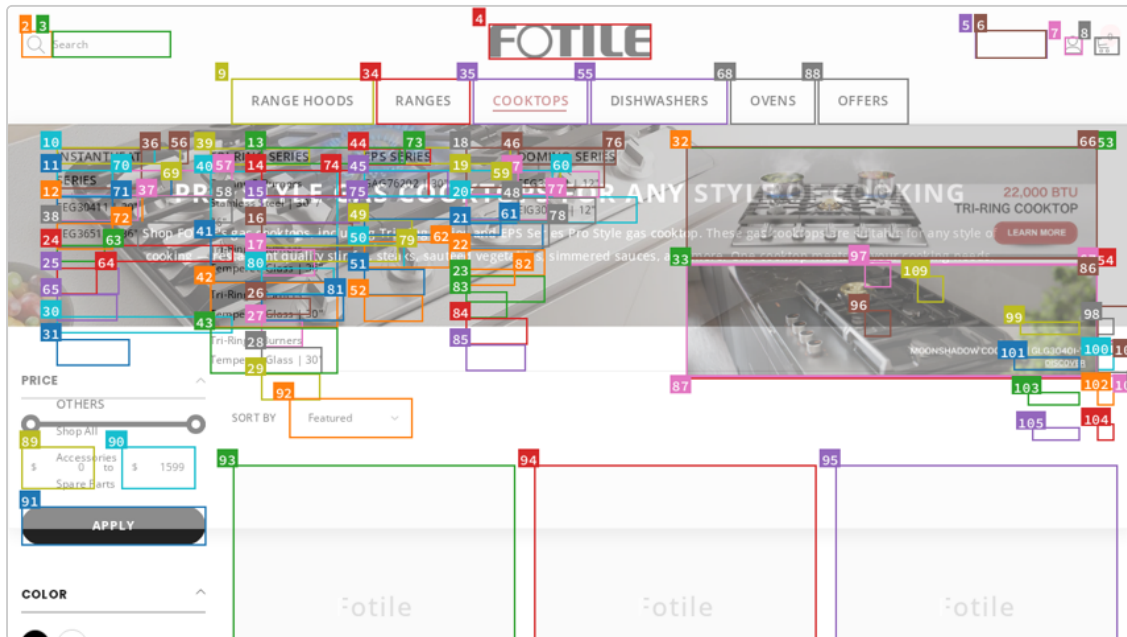

## Response:

To compare the prices of three different models of FOTILE cooktops, I need to search for the cooktops and then filter or sort the results to view their prices. Here's the plan:

1. Use the search bar to find cooktops.
2. Apply filters or sort options to view the prices of different models.
3. Compare the prices of three models.

Let's start by searching for "cooktops" to find the relevant products.

```
```json
{
  "name": "type",
  "arguments": {
    "text": "cooktops",
    "element_id": "2",
    "field_description": "search input field",
```

"reasoning": "I need to search for cooktops to find their prices"

}  
}  
...

**Step 3 (2025-10-08T04:21:07.747269)**

**Screenshots:**

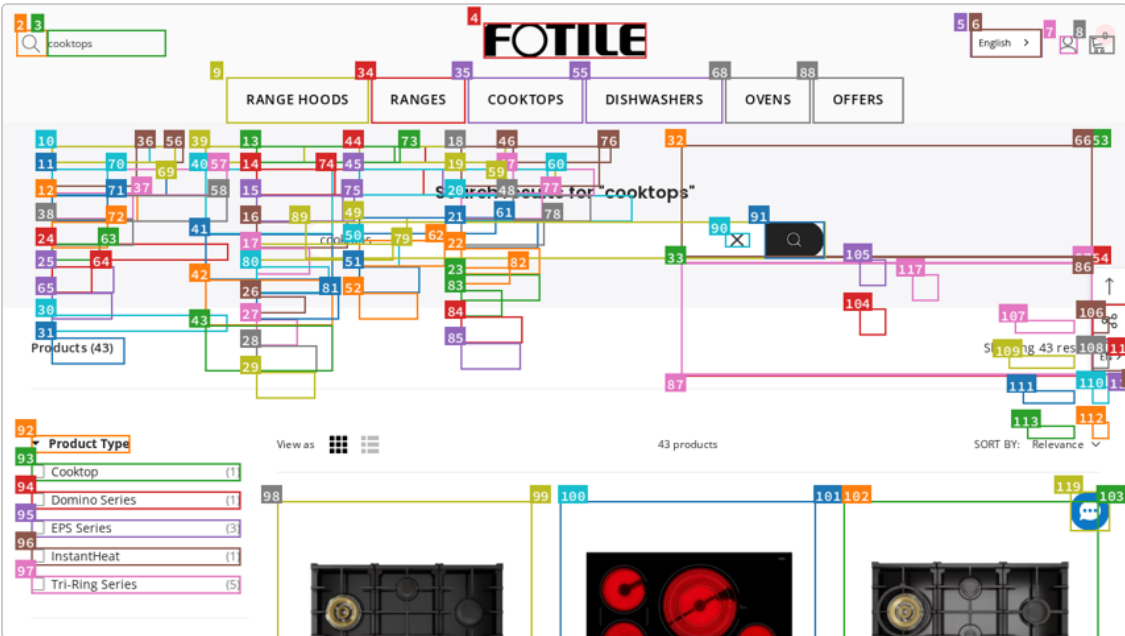

**Response:**

To compare the prices of three different models of FOTILE cooktops, I need to identify and select specific cooktop models from the search results. The page shows product categories and images, which can help me narrow down the options. I'll start by clicking on one of the product images to view its details, including the price.

**\*\*Reasoning:\*\*** I need to gather price information for three different cooktop models. Clicking on a product image will likely lead me to a detailed product page where I can find the price.

```
```json
{
  "name": "click",
  "arguments": {
    "element_id": "98",
    "coords": "420 680",
    "description": "Cooktop product image (left)",
    "reasoning": "Clicking on the product image will likely lead to the
product details page where I can find the price."
  }
}
```
```

#### Step 4 (2025-10-08T04:21:31.000968)

#### Screenshots:

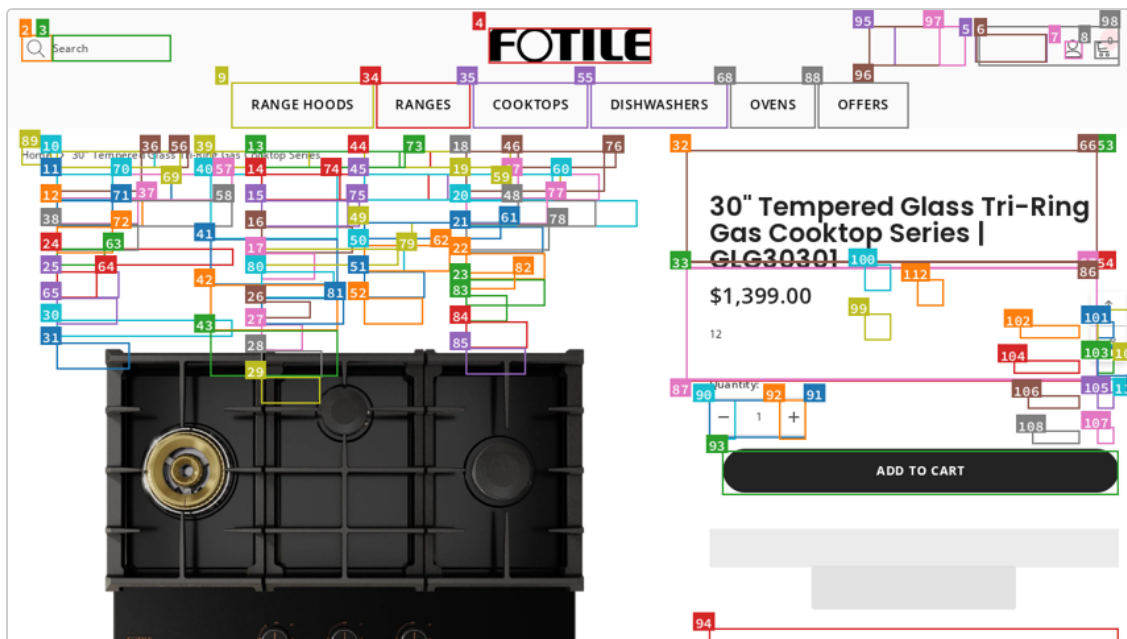

## Response:

To compare the prices of three different models of FOTILE cooktops, I need to search for other cooktop models and gather their prices. Here's the plan:

1. Use the search bar to find other cooktop models.
2. Click on the search bar and type "cooktop" to see a list of available models.
3. Review the search results and select two more cooktop models to compare with the current one (GLG20301).

Action:

```
```json
{
  "name": "type",
  "arguments": {
    "text": "cooktop",
    "element_id": "2",
    "field_description": "search input field",
    "reasoning": "I need to search for other cooktop models to compare prices"
  }
}
```
```

**Step 5** (2025-10-08T04:21:49.560383)

## Screenshots:

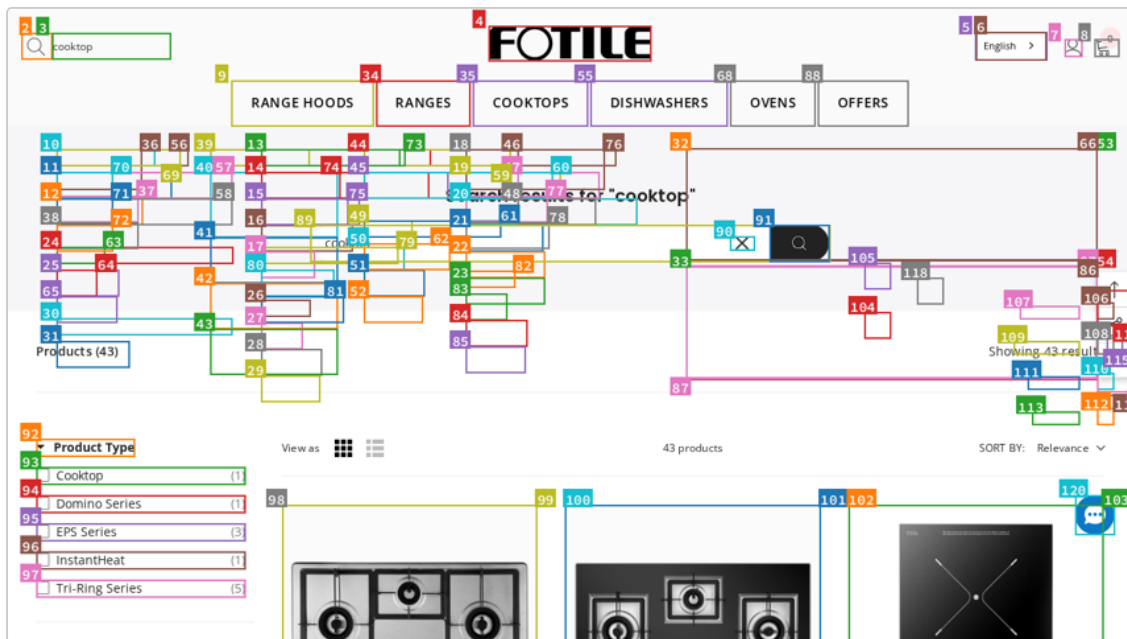

## Response:

To compare the prices of three different models of FOTILE cooktops, I need to identify and select three cooktop models from the search results. Since the current view shows only a portion of the available products, I will scroll to explore more options and find the prices.

**\*\*Reasoning:\*\*** The current view displays a limited number of cooktop models, and I need to ensure I have enough options to compare three different models. Scrolling will help me access more products and potentially find their prices.

```
```json
{
  "name": "scroll",
  "arguments": {
    "direction": "down",
    "reasoning": "I need to scroll to view more cooktop models and find their prices for comparison."
  }
}
```

```
}  
}  
...
```

## Step 6 (2025-10-08T04:22:17.508634)

### Screenshots:

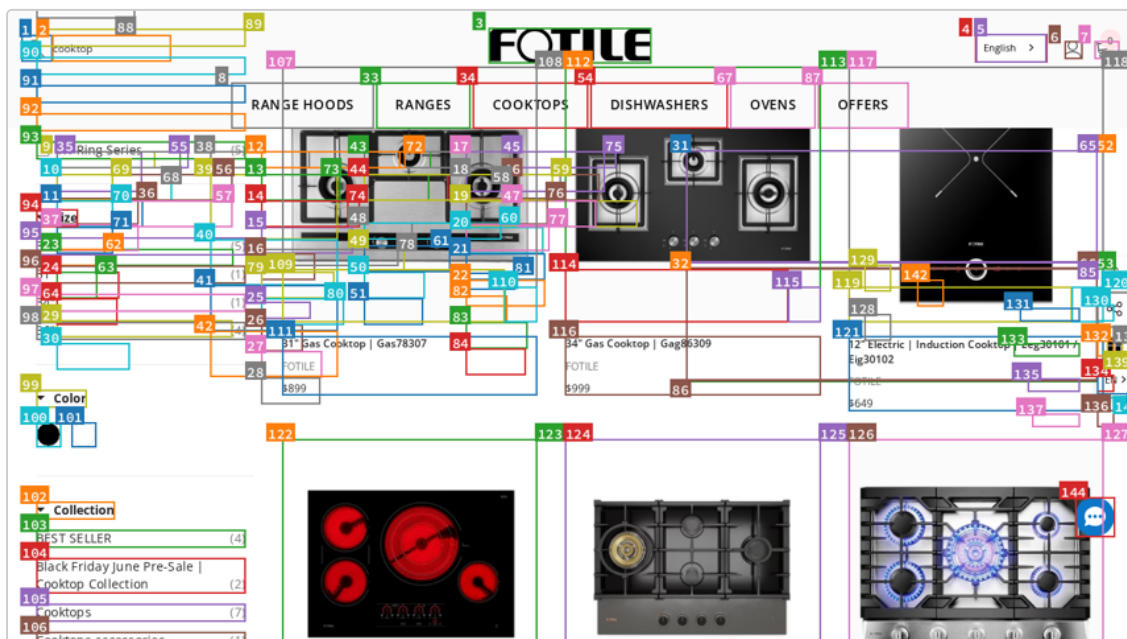

### Response:

To compare the prices of three different models of FOTILE cooktops, I will first identify the cooktops and their prices from the image. Then, I will proceed to compare them.

### Reasoning:

1. **Identify Cooktops and Prices:**

- From the image, I can see three cooktop models with their prices:
- **31" Gas Cooktop | Gas78307:** Priced at \$899.
- **34" Gas Cooktop | Gag80309:** Priced at \$999.
- **12" Electric Induction Cooktop | Eig30102:** Priced at \$649.



## 2. **\*\*Comparison:\*\***

- I will compare these prices to determine which cooktop is the most expensive, the least expensive, and the middle-priced option.

## 3. **\*\*Action Plan:\*\***

- Since the prices are already visible in the image, I don't need to perform any additional actions to find the information. I can directly provide the comparison.

### Action:

```
```json
```

```
{
```

```
  "name": "stop",
```

```
  "arguments": {
```

```
    "answer": "The prices of the three FOTILE cooktops are as follows:\n1.
```

```
31\" Gas Cooktop | Gas78307: $899\n2. 34\" Gas Cooktop | Gag80309:
```

```
$999\n3. 12\" Electric Induction Cooktop | Eig30102: $649\n\nComparison:
```

```
\n- Most expensive: 34\" Gas Cooktop | Gag80309 ($999)\n- Middle-
```

```
priced: 31\" Gas Cooktop | Gas78307 ($899)\n- Least expensive: 12\"
```

```
Electric Induction Cooktop | Eig30102 ($649)",
```

```
  "reasoning": "The prices of the cooktops are clearly visible in the image,  
so no further actions are needed to compare them."
```

```
  }
```

```
}
```

```
```
```
