# Supplementary material
Source: ML conference proceedings conference paper supplement (https://openreview.net/forum?id=cvAZKWA1HZ)
Supplement: supplementary_material [file food_tasks_food_V7_231.pdf › supplementary_materials/trajectory_evaluation/food_tasks_food_V7_231.pdf]

# Task Report

Session ID: food\_tasks\_food\_V7\_231

Task Description: Search for a recipe containing "chicken" and "sauce"

Total Rounds: 8

## Step 1 (2025-10-08T05:09:35.081709)

### Screenshots:

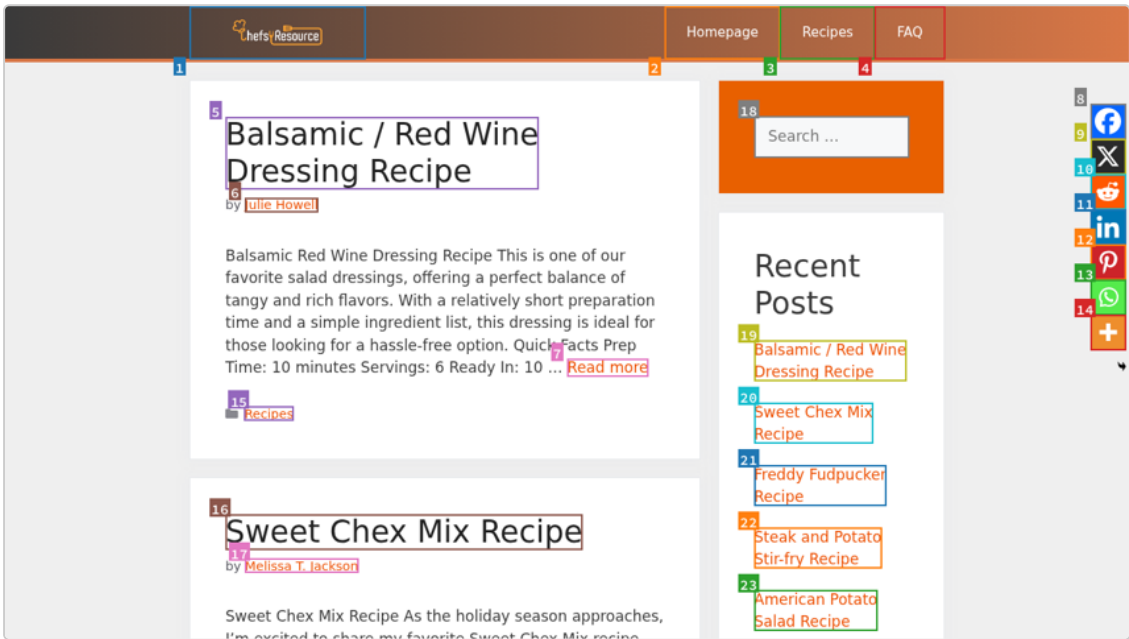

### Response:

```
```json
{
  "name": "type",
```

```
"arguments": {
  "text": "chicken sauce",
  "element_id": "18",
  "field_description": "search input field",
  "reasoning": "I need to search for recipes containing 'chicken' and
'sauce' to find the desired result."
}
}
...
```

## Step 2 (2025-10-08T05:09:55.720252)

### Screenshots:

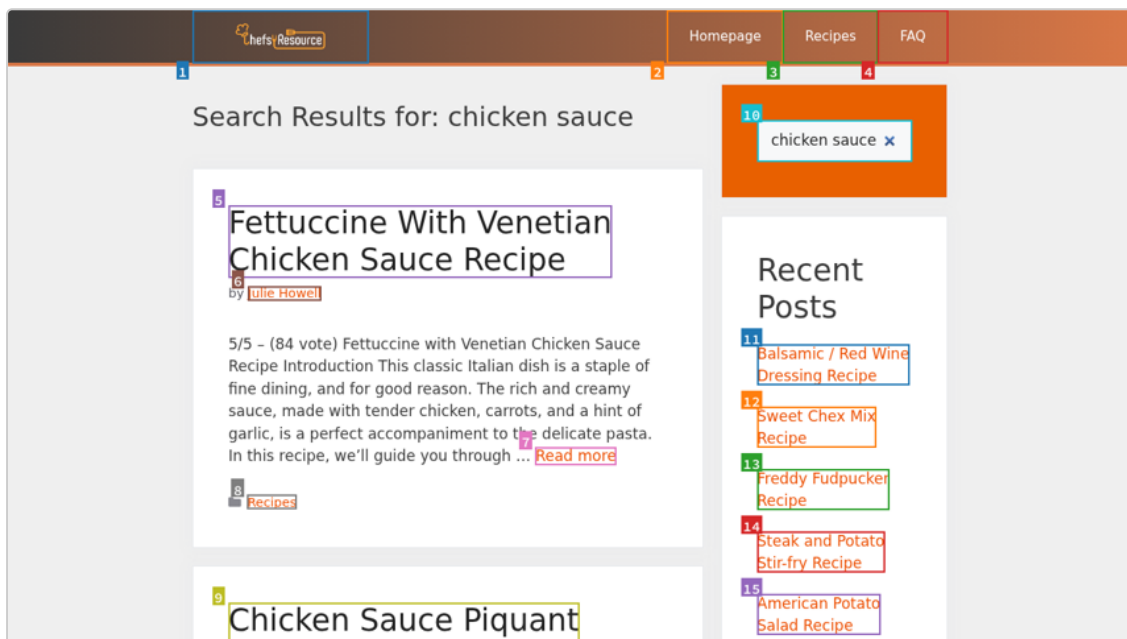

### Response:

```
``json
{
  "name": "click",
  "arguments": {
```

```

    "element_id": "5",
    "description": "Fettuccine With Venetian Chicken Sauce Recipe",
    "reasoning": "I need to click on the recipe to view more details about it,
as it matches the search criteria for 'chicken' and 'sauce'."
  }
}
...

```

### Step 3 (2025-10-08T05:10:17.511925)

#### Screenshots:

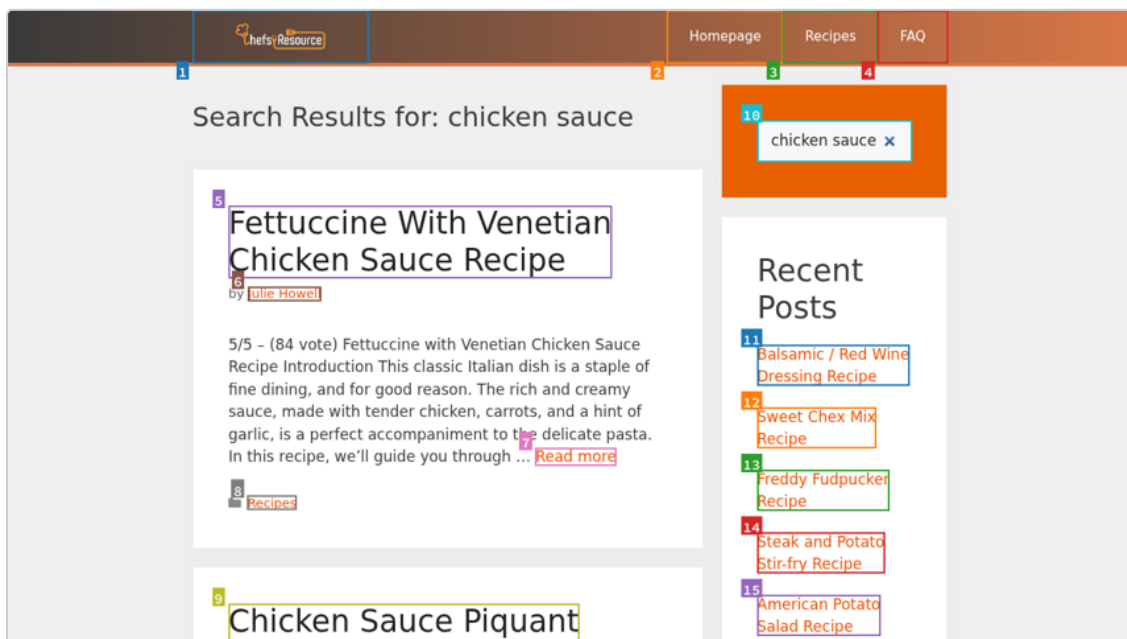

#### Response:

```

``json
{
  "name": "click",
  "arguments": {
    "element_id": "5",
    "description": "Fettuccine With Venetian Chicken Sauce Recipe",

```

"reasoning": "I need to click on the recipe title to view more details about it."

```
}  
}  
``
```

#### Step 4 (2025-10-08T05:10:37.631703)

#### Screenshots:

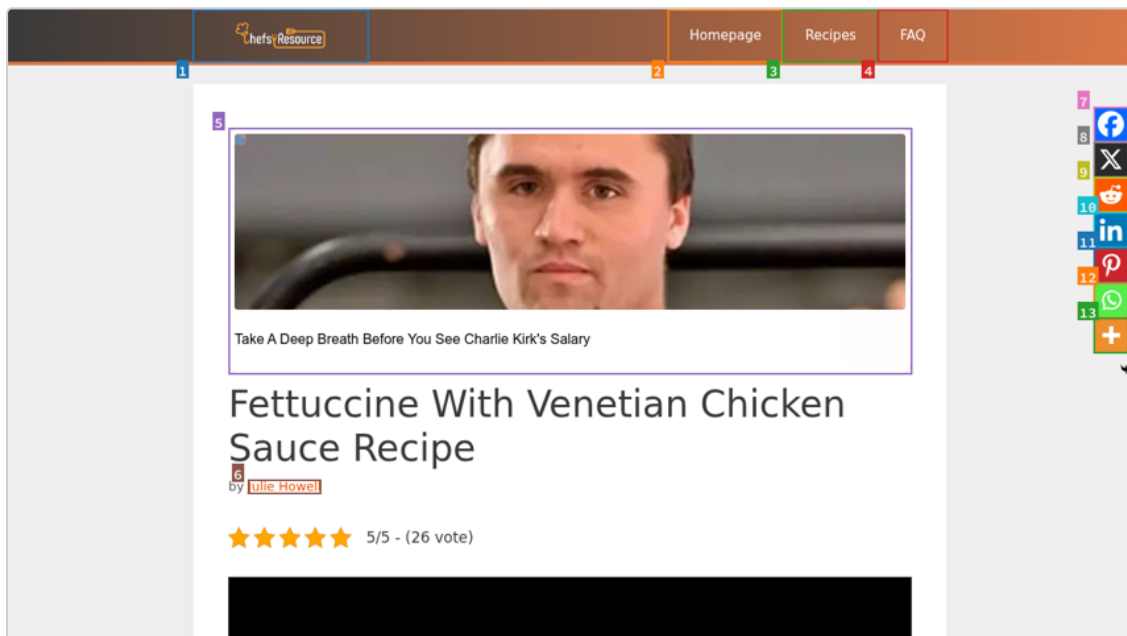

#### Response:

```
``json  
{  
  "name": "click",  
  "arguments": {  
    "element_id": "3",  
    "description": "Recipes tab",  
    "reasoning": "I need to navigate to the Recipes section to search for a  
recipe containing 'chicken' and 'sauce'."
```

```
}  
}  
...
```

## Step 5 (2025-10-08T05:10:53.331779)

### Screenshots:

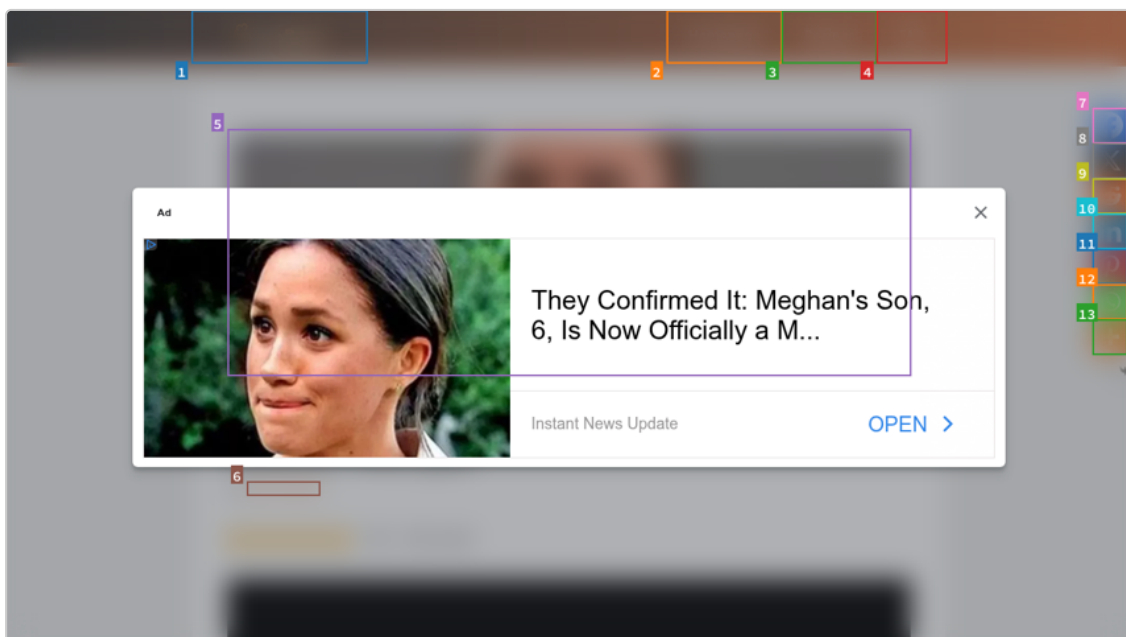

### Response:

To search for a recipe containing "chicken" and "sauce," I need to locate a search input field or a relevant page where I can enter the search terms. Since the current page doesn't show a search bar or relevant content, I'll start by looking for a search input field or a way to navigate to a recipe section.

**\*\*Action:\*\***

```json

{

"name": "click",

```

"arguments": {
  "element_id": "7",
  "description": "element 7, which might lead to a search or navigation menu",
  "reasoning": "I need to access a search function or navigate to a recipe section to find the desired content."
}
}
...

```

## Step 6 (2025-10-08T05:11:13.022167)

### Screenshots:

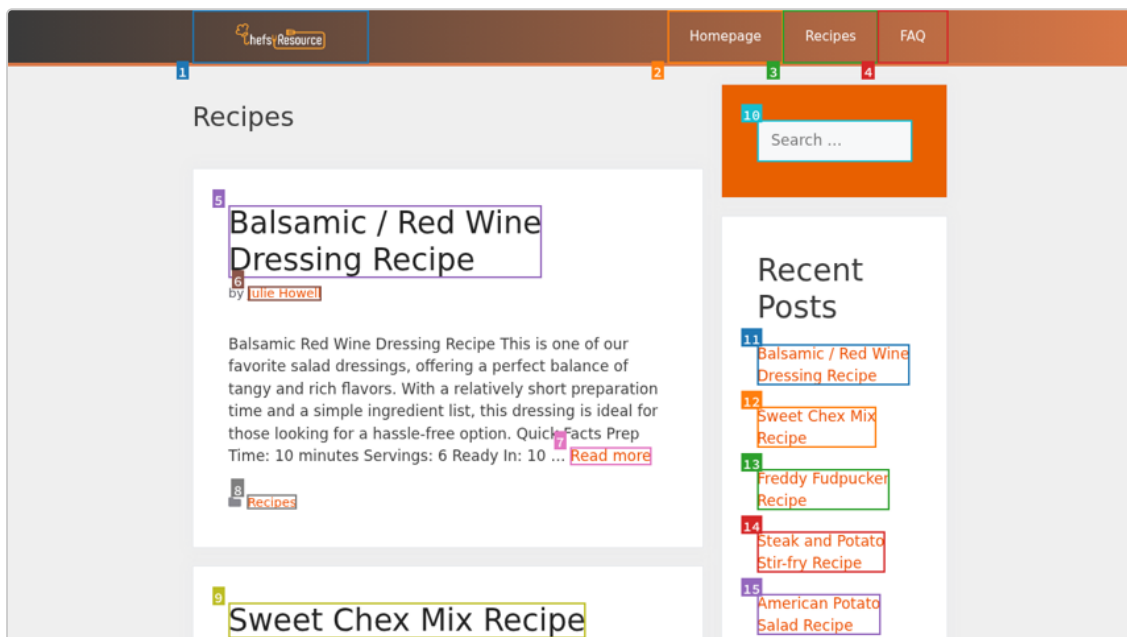

### Response:

```

``json
{
  "name": "type",
  "arguments": {

```

```

    "text": "chicken sauce",
    "element_id": "10",
    "field_description": "search input field",
    "reasoning": "I need to search for recipes containing 'chicken' and
'sauce' to find the desired result"
  }
}
...

```

## Step 7 (2025-10-08T05:11:27.231613)

### Screenshots:

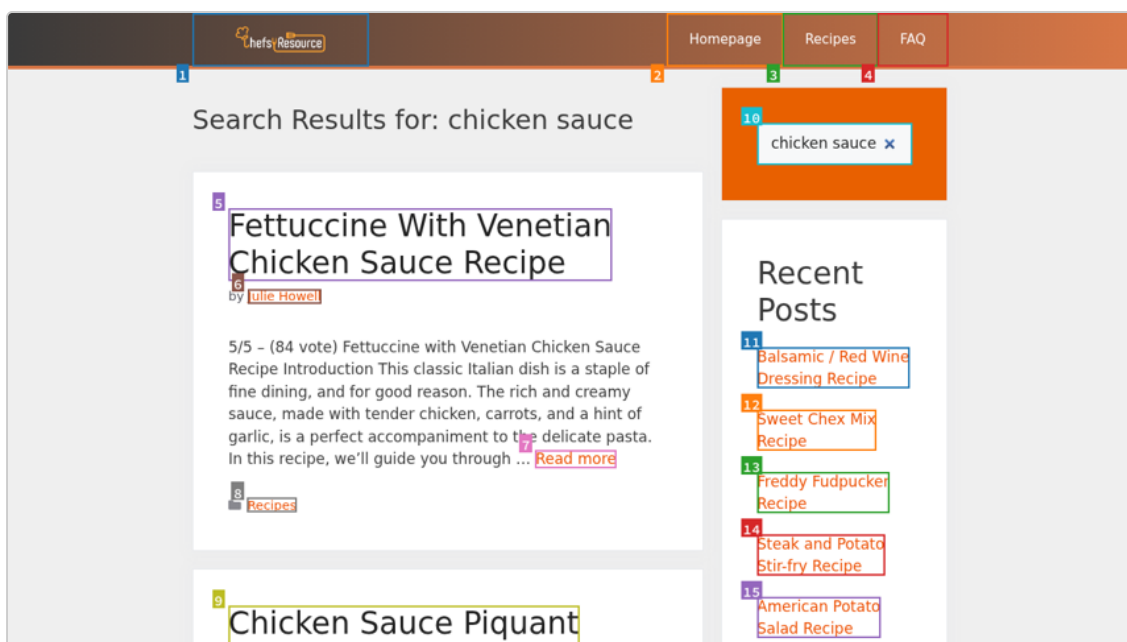

### Response:

```

``json
{
  "name": "click",
  "arguments": {
    "element_id": "5",

```

```
"description": "Fettuccine With Venetian Chicken Sauce Recipe",
"reasoning": "I need to click on the recipe title to view more details
about it."
}
}
'''
```

**Step 8** (2025-10-08T05:11:47.601856)

## Screenshots:

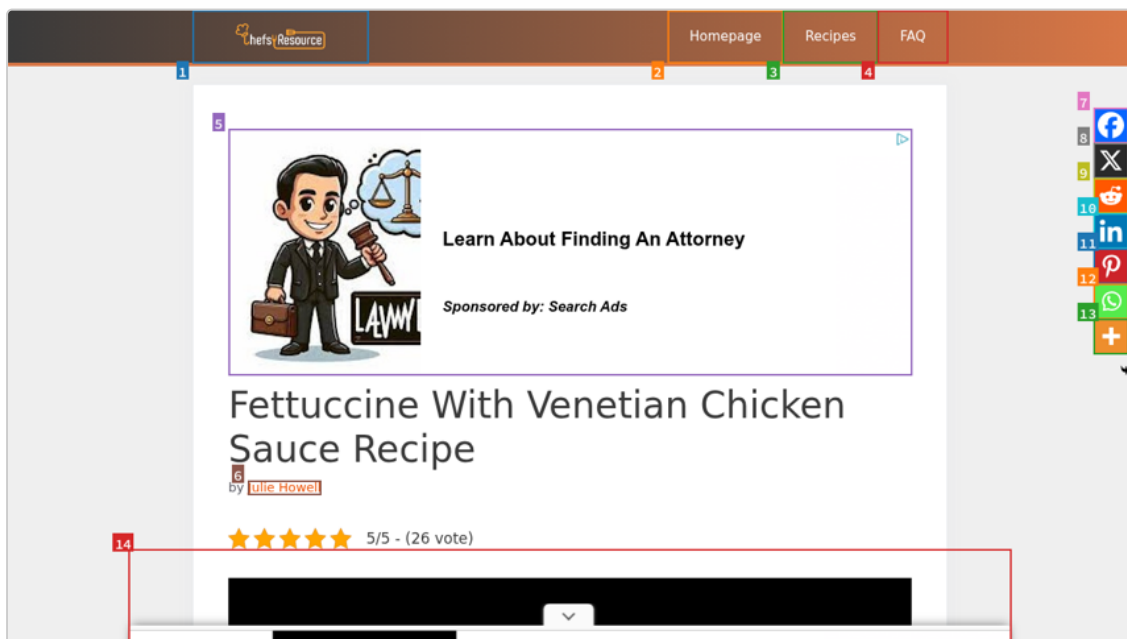

## Response:

```
```json
{
  "name": "stop",
  "arguments": {
    "answer": "The recipe 'Fettuccine With Venetian Chicken Sauce'
contains both 'chicken' and 'sauce', meeting the search criteria.",
    "reasoning": "The current page already displays a recipe that includes
```



both 'chicken' and 'sauce', so no further actions are needed."

}

}

...
