# Supplementary material
Source: ML conference proceedings conference paper supplement (https://openreview.net/forum?id=cvAZKWA1HZ)
Supplement: supplementary_material [file food_tasks_food_V71_212.pdf › supplementary_materials/trajectory_evaluation/food_tasks_food_V71_212.pdf]

# Task Report

Session ID: food\_tasks\_food\_V71\_212

Task Description: Explore the "New: Ree's Best Family Meals" section and list the names of the first 3 recipes

Total Rounds: 5

Step 1 (2025-10-07T14:37:52.545291)

## Screenshots:

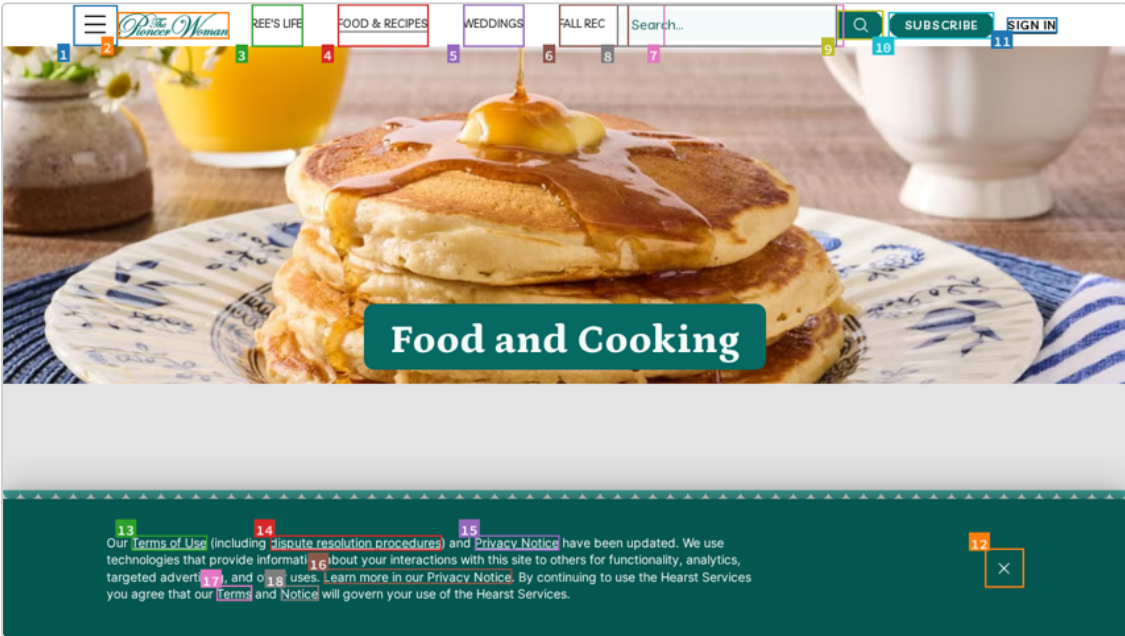

## Response:

To find the "New: Ree's Best Family Meals" section and list the first 3 recipes, I'll start by scrolling down the page to locate this section. Since it's

not visible in the current view, scrolling is necessary.

**\*\*Action:\*\***

```
```json
```

```
{
```

```
  "name": "scroll",
```

```
  "arguments": {
```

```
    "direction": "down",
```

```
    "reasoning": "The 'New: Ree's Best Family Meals' section is not visible, so I need to scroll down to find it."
```

```
  }
```

```
}
```

```
```
```

## Step 2 (2025-10-07T14:38:06.379852)

### Screenshots:

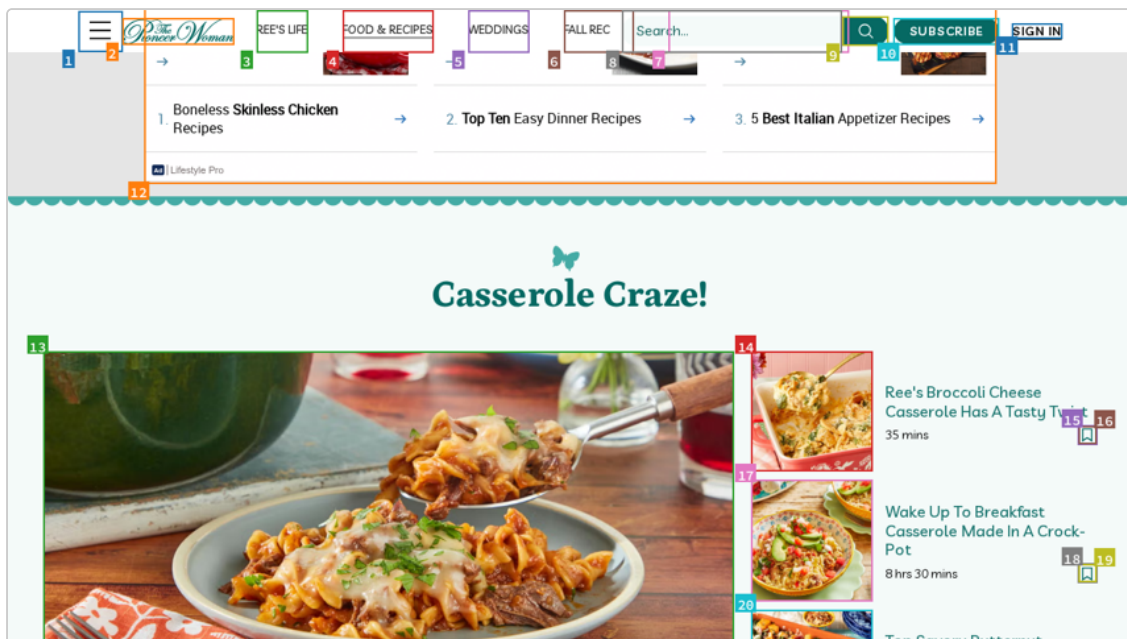

## Response:

To find the "New: Ree's Best Family Meals" section and list the first 3 recipes, I need to scroll down the page since it's not currently visible. This will help me locate the desired section.

**\*\*Action:\*\***

```json

{

"name": "scroll",

"arguments": {

"direction": "down",

"reasoning": "To locate the 'New: Ree's Best Family Meals' section, which is not currently visible on the page."

}

}

```

**Step 3 (2025-10-07T14:38:25.504095)**

## Screenshots:

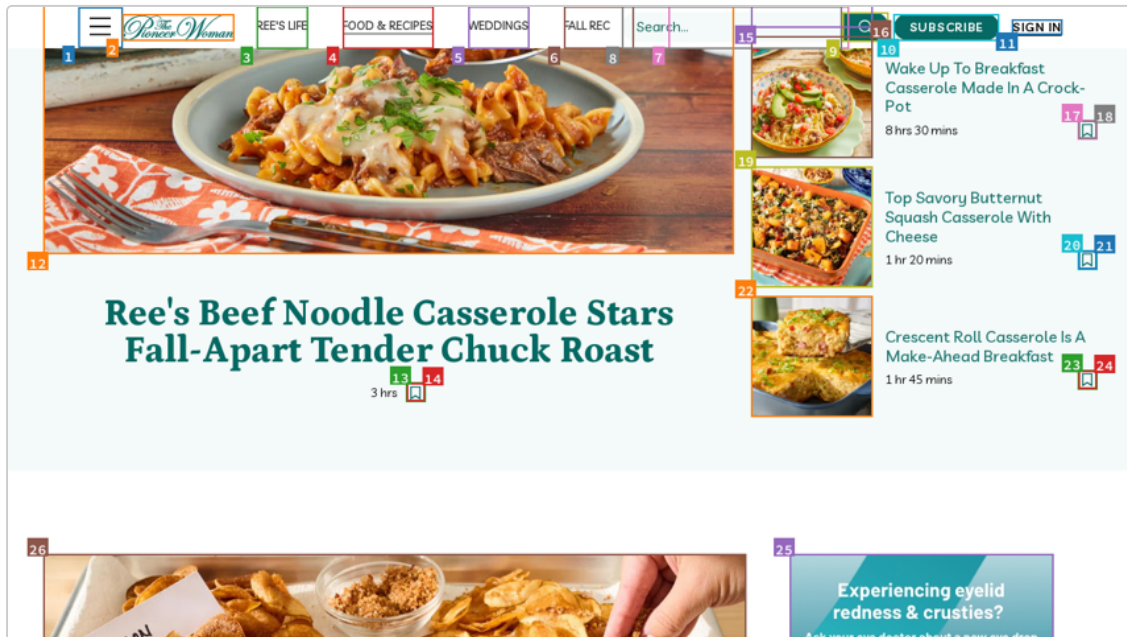

## Response:

To find the "New: Ree's Best Family Meals" section and list the first 3 recipes, I need to explore the page further. Since the current view doesn't show this section, I will scroll down to see more content.

Action:

```
```json
```

```
{
  "name": "scroll",
  "arguments": {
    "direction": "down",
    "reasoning": "I need to scroll down to find the 'New: Ree's Best Family Meals' section."
  }
}
```

## Screenshots:

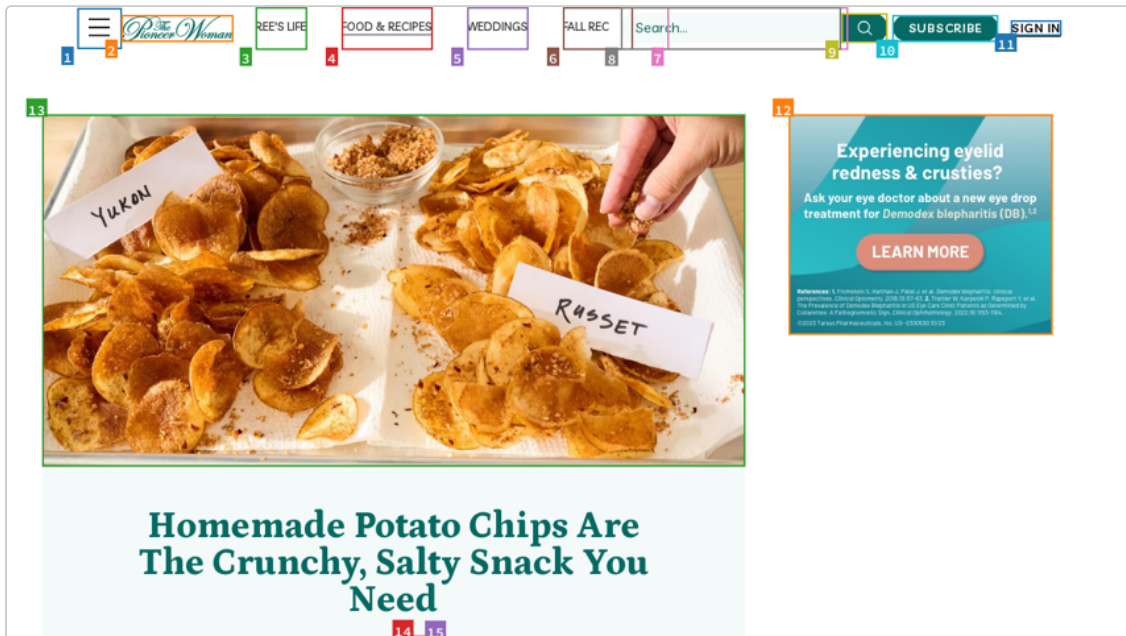

## Response:

To find the "New: Ree's Best Family Meals" section and list the first 3 recipes, I need to navigate to the relevant section of the website. Since the current page is focused on homemade potato chips, I should use the search bar to look for "Ree's Best Family Meals."

Action: Use the search bar to find "Ree's Best Family Meals."

```
``json
{
  "name": "type",
  "arguments": {
    "text": "Ree's Best Family Meals",
    "element_id": "7",
    "field_description": "search input field",
    "reasoning": "I need to search for the 'Ree's Best Family Meals' section"
```

to find the recipes."

}

}

...

## Step 5 (2025-10-07T14:38:56.252966)

### Screenshots:

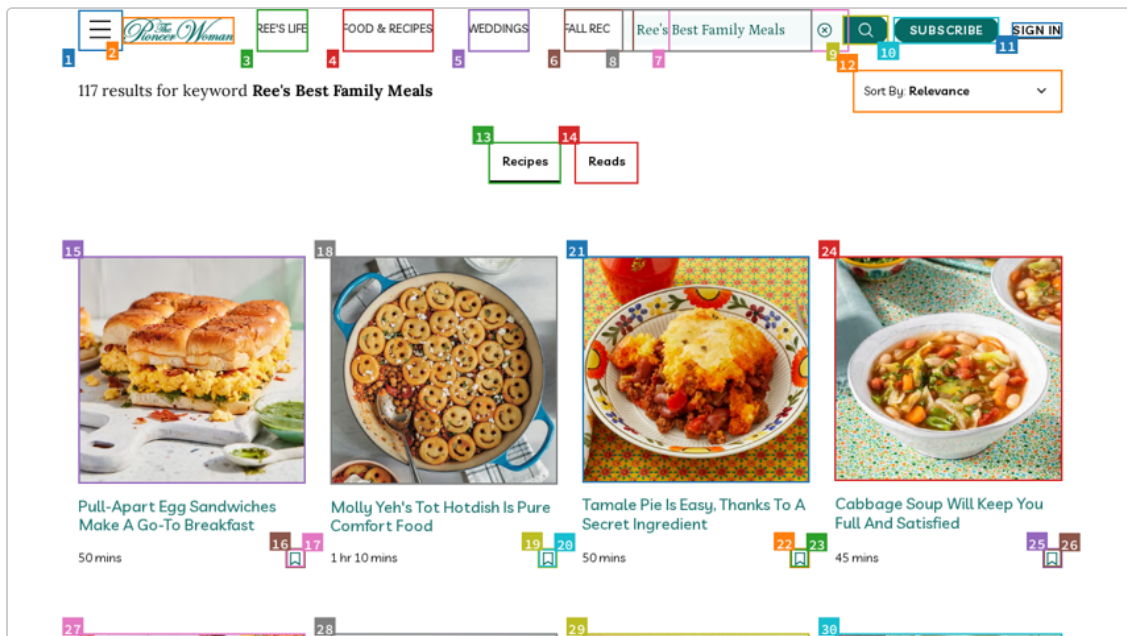

### Response:

To accomplish the task of listing the first three recipes from the "New: Ree's Best Family Meals" section, I will identify and click on the relevant section if necessary, then extract the recipe names.

### Reasoning:

1. The current page already displays search results for "Ree's Best Family Meals," so I don't need to navigate further.
2. The first three recipes are clearly visible in the grid layout.
3. I will extract the names of these recipes and provide them as the final

answer.

### Action:

Since the recipes are already visible, I will directly list them and stop the process.

```
```json
{
  "name": "stop",
  "arguments": {
    "answer": "The first three recipes in the 'New: Ree's Best Family Meals' section are:\n1. Pull-Apart Egg Sandwiches Make A Go-To Breakfast\n2. Molly Yeh's Tot Hotdish Is Pure Comfort Food\n3. Tamale Pie Is Easy, Thanks To A Secret Ingredient",
    "reasoning": "The recipes are clearly visible in the search results, and no further navigation or interaction is required."
  }
}
```
```
