# Supplementary material
Source: ML conference proceedings conference paper supplement (https://openreview.net/forum?id=cvAZKWA1HZ)
Supplement: supplementary_material [file government_tasks_government_3239.pdf › supplementary_materials/trajectory_evaluation/government_tasks_government_3239.pdf]

# Task Report

Session ID: government\_tasks\_government\_3239

Task Description: Could you help me navigate to the "Maps" section to view detailed maps of the park?

Total Rounds: 4

## Step 1 (2025-09-19T07:45:55.501702)

### Screenshots:

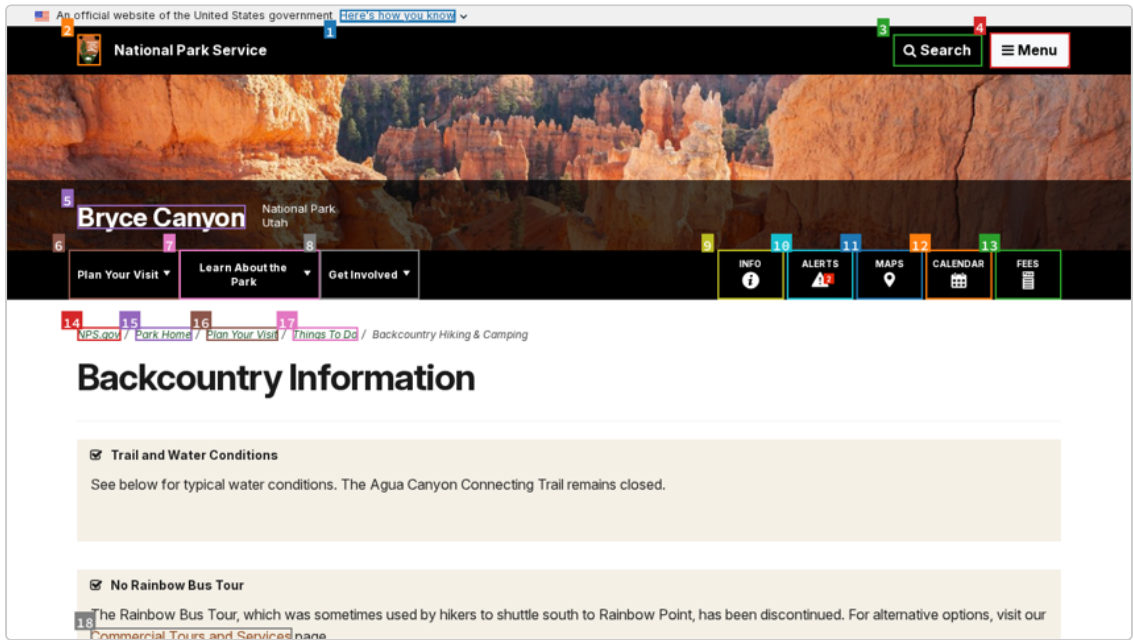

### Response:

```
```json
{
```

```
"name": "click",
"arguments": {
  "element_id": "11",
  "description": "11 Maps link",
  "reasoning": "Clicking on the 'Maps' link will navigate to the detailed
maps section of the park."
}
}
...
```

## Step 2 (2025-09-19T07:46:05.941601)

### Screenshots:

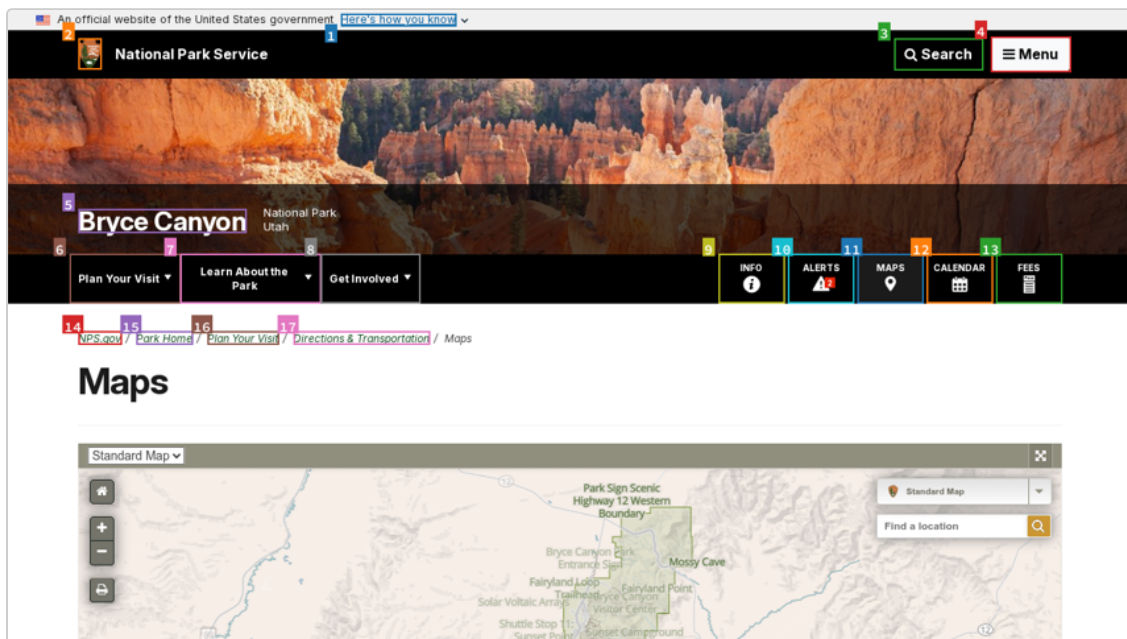

### Response:

```
```json
{
  "name": "click",
  "arguments": {
```

```
"element_id": "17",
"description": "Maps link",
"reasoning": "Clicking on the 'Maps' link will navigate to the Maps
section where detailed maps of the park can be viewed."
}
}
````
```

### Step 3 (2025-09-19T07:46:16.728601)

#### Screenshots:

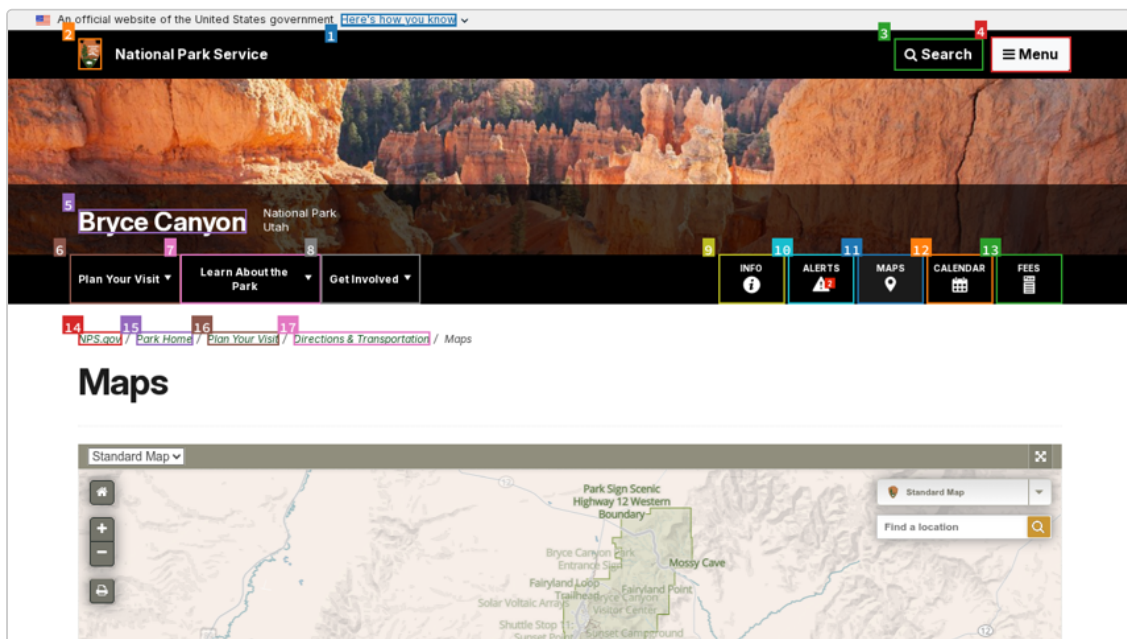

#### Response:

```
````json
{
  "name": "click",
  "arguments": {
    "element_id": "17",
    "description": "Maps link",
```

"reasoning": "Clicking on the 'Maps' link will navigate to the Maps section where detailed maps of the park can be viewed."

```
}  
}  
...
```

#### Step 4 (2025-09-19T07:46:30.680642)

### Screenshots:

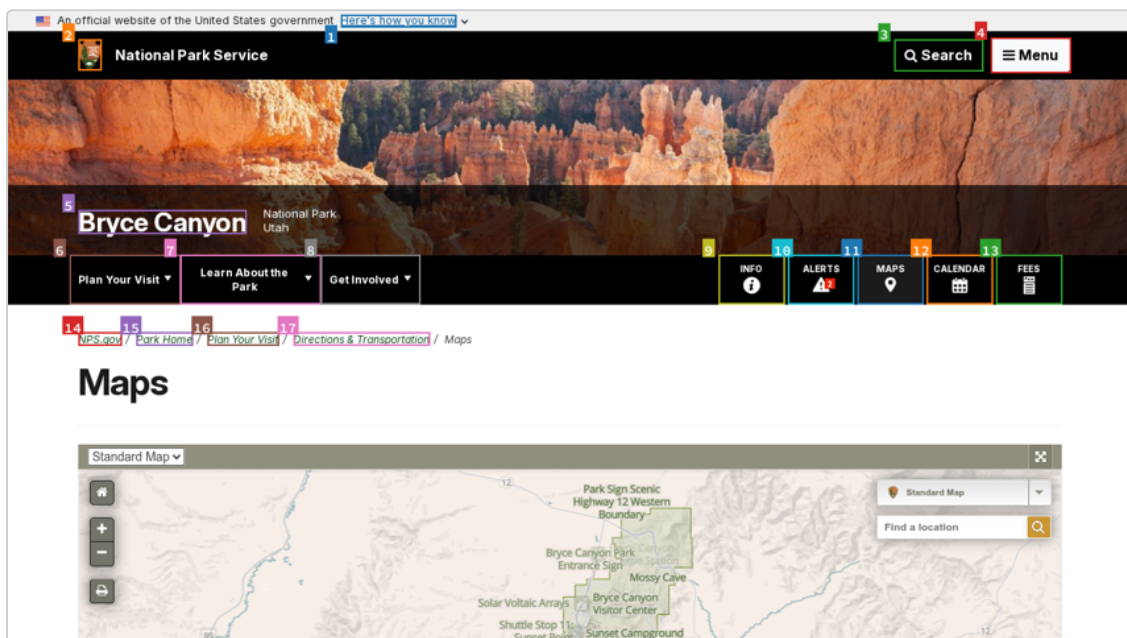

### Response:

Thought: Since we are already on the "Maps" section of the Bryce Canyon National Park website, there is no need to navigate further. The task is complete as we have reached the desired section.

Action:

```
```json
```

```
{
```

```
  "name": "stop",
```

```
"arguments": {  
  "answer": "We have successfully navigated to the 'Maps' section of the  
Bryce Canyon National Park website. The map is displayed, showing key  
locations such as the park entrance sign, visitor center, campground,  
shuttle stop, and solar voltaic arrays.",  
  "reasoning": "The task is complete as we have reached the 'Maps'  
section and can view the detailed maps of the park."  
}  
}  
...
```
