# Supplementary material
Source: ML conference proceedings conference paper supplement (https://openreview.net/forum?id=cvAZKWA1HZ)
Supplement: supplementary_material [file government_tasks_government_V71_4446.pdf › supplementary_materials/trajectory_evaluation/government_tasks_government_V71_4446.pdf]

# Task Report

**Session ID:** government\_tasks\_government\_V71\_4446

**Task Description:** Extract the contact information for the Secretary of State's office

**Total Rounds:** 5

**Step 1** (2025-10-09T06:48:51.090811)

## Screenshots:

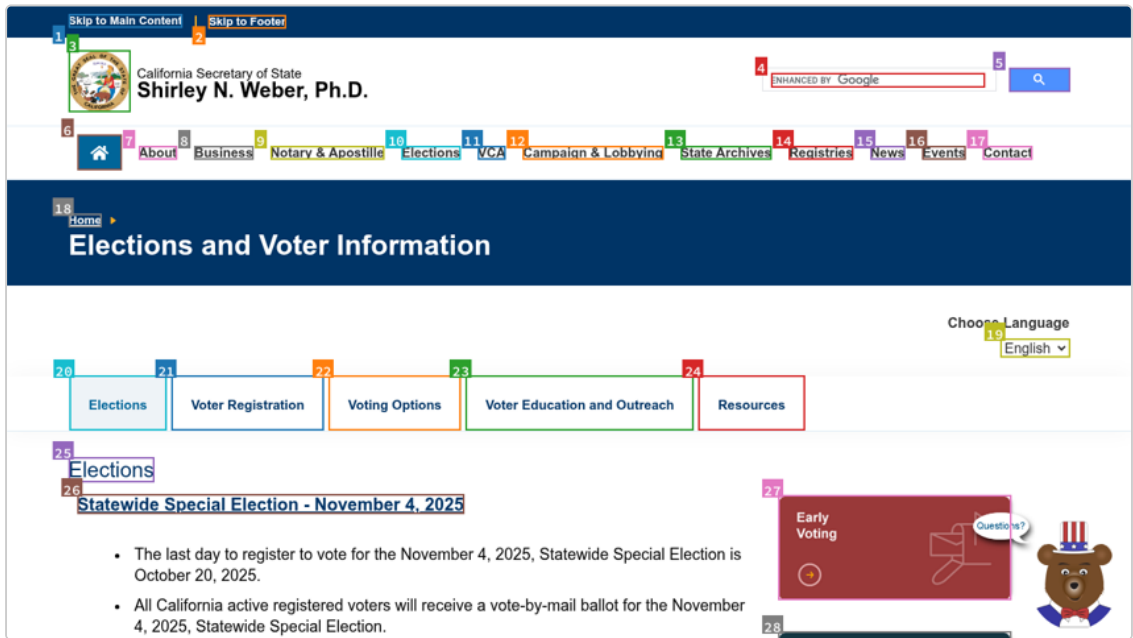

## Response:

To find the contact information for the Secretary of State's office, I should navigate to the "Contact" section of the website. The "Contact" link is

visible in the main navigation menu.

**\*\*Reasoning:\*\*** The "Contact" link is likely to lead to a page where contact details for the Secretary of State's office are provided. Clicking this link is a logical next step to achieve the goal.

```
```json
{
  "name": "click",
  "arguments": {
    "element_id": "17",
    "description": "Contact link in the navigation menu",
    "reasoning": "Clicking the Contact link will likely lead to a page with contact information for the Secretary of State's office."
  }
}
```
```

## Step 2 (2025-10-09T06:49:09.308508)

## Screenshots:

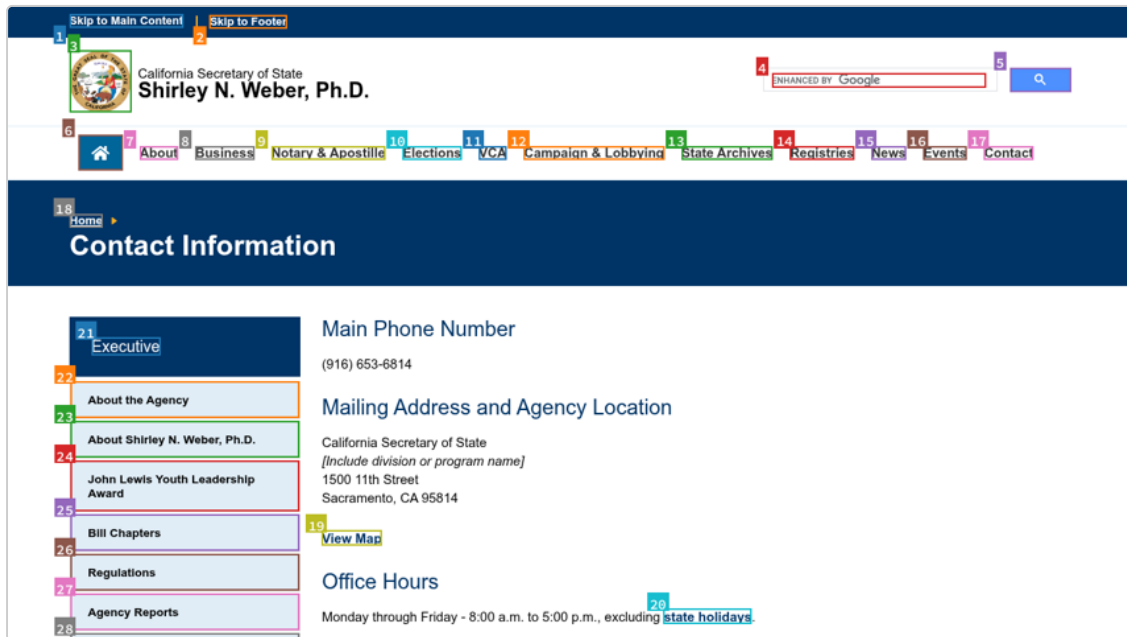

## Response:

```
```json
{
  "name": "click",
  "arguments": {
    "element_id": "19",
    "description": "View Map link",
    "reasoning": "Clicking the 'View Map' link will likely provide more detailed geographical information about the Secretary of State's office location."
  }
}
```
```

## Screenshots:

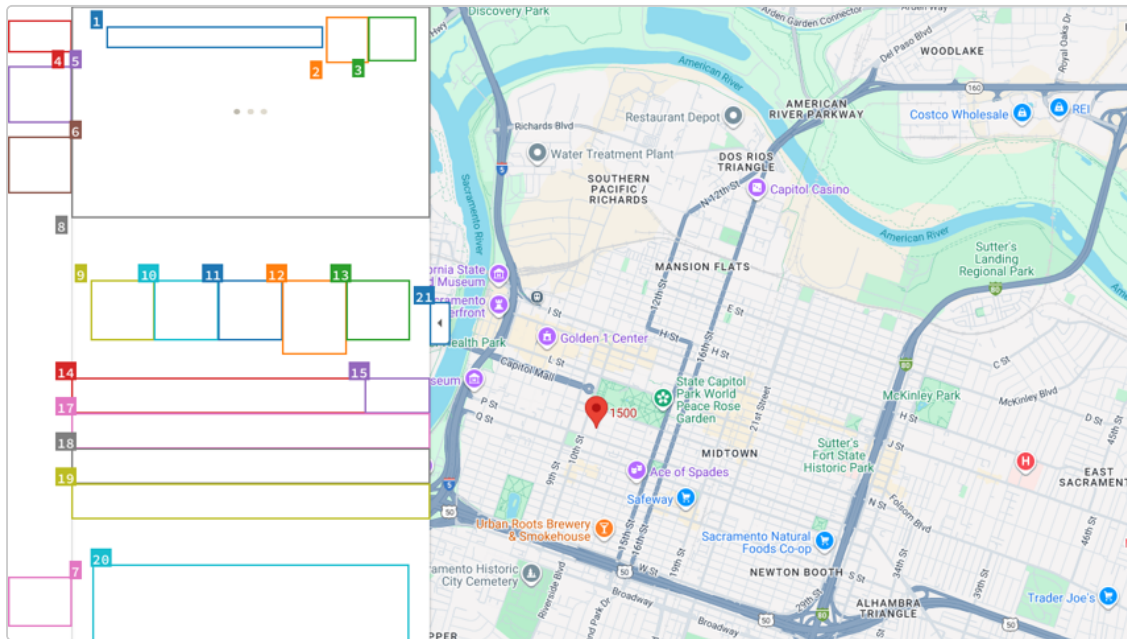

## Response:

To extract the contact information for the Secretary of State's office, I need to interact with the map and the numbered boxes to locate the relevant information. Since the current page shows a map and a selection interface, I will start by clicking on the numbered box that might lead to more details about the Secretary of State's office.

**\*\*Reasoning:\*\*** The numbered boxes likely correspond to different locations or entities on the map. I will click on one of these boxes to see if it provides contact information or leads to a page with more details.

**\*\*Action:\*\*** Click on the numbered box labeled "15" (pink box) as it might be related to the Secretary of State's office.

```
```json
{
  "name": "click",
  "arguments": {
```

```
"element_id": "15",  
"description": "Numbered box labeled '15' (pink box)",  
"reasoning": "Clicking this box might provide information about the  
Secretary of State's office."  
}  
}  
...
```

#### Step 4 (2025-10-09T06:49:36.092980)

#### Screenshots:

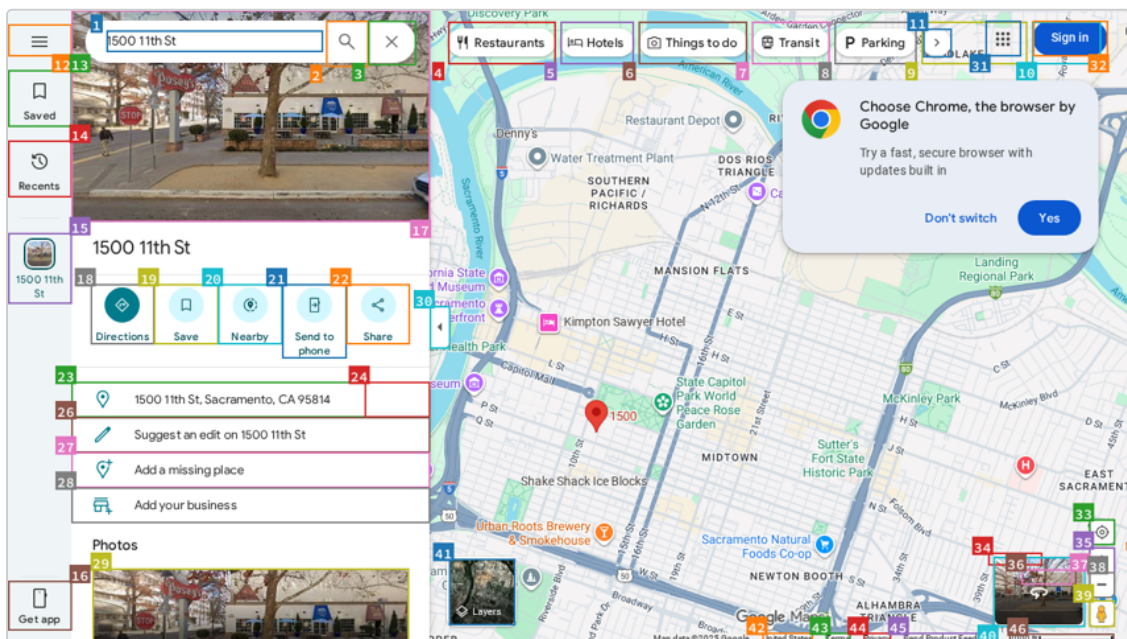

#### Response:

To extract the contact information for the Secretary of State's office, I need to search for it directly. Since the current search term is "1500 11th St," I will first clear this search term and then type in "Secretary of State's office" to find the relevant information.

**\*\* Action:\*\***

```

```json
{
  "name": "type",
  "arguments": {
    "text": "Secretary of State's office",
    "element_id": "1",
    "field_description": "search input field",
    "reasoning": "I need to search for the Secretary of State's office information"
  }
}
```

```

## Step 5 (2025-10-09T06:49:53.064078)

### Screenshots:

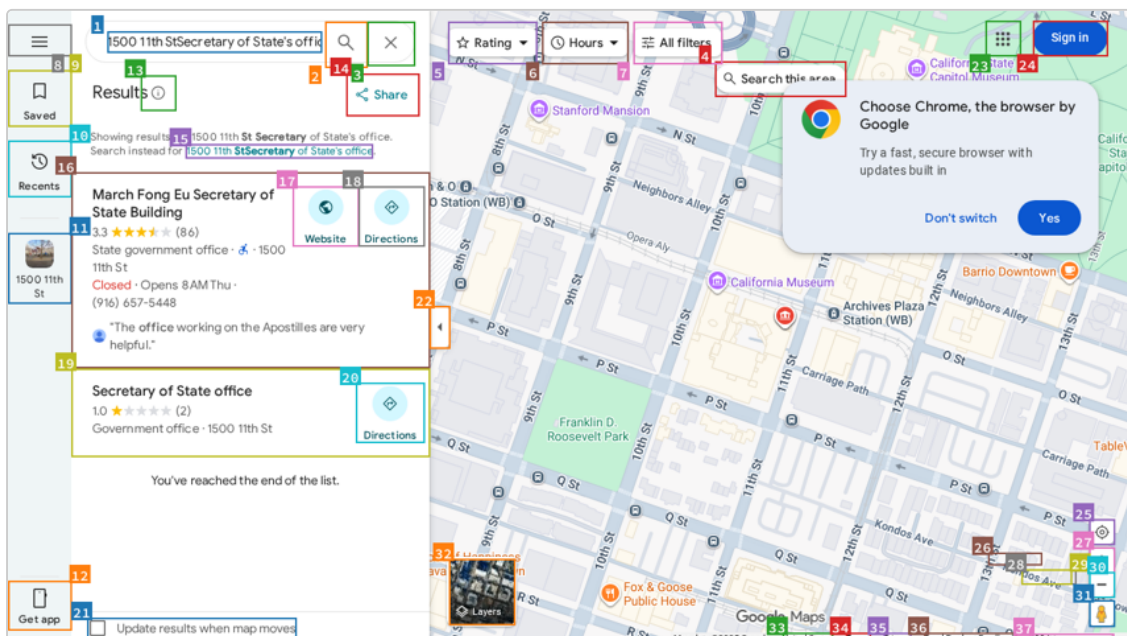

## Response:

To extract the contact information for the Secretary of State's office, I need to focus on the search result entry for "March Fong Eu Secretary of State Building," as it provides the necessary details.

### Reasoning:

- The contact information is visible in the first search result entry.
- The phone number is listed as part of the contact details.

### Action:

Since the contact information is already visible, I can directly extract it and stop the process.

```
```json
{
  "name": "stop",
  "arguments": {
    "answer": "The contact information for the Secretary of State's office is:
Phone number: (916) 657-5448.",
    "reasoning": "The contact information is clearly displayed in the search
result for 'March Fong Eu Secretary of State Building.'"
  }
}
```
```
