# Supplementary material
Source: ML conference proceedings conference paper supplement (https://openreview.net/forum?id=cvAZKWA1HZ)
Supplement: supplementary_material [file health_tasks_health_130.pdf › supplementary_materials/trajectory_evaluation/health_tasks_health_130.pdf]

# Task Report

**Session ID:** health\_tasks\_health\_130

**Task Description:** Search for "Migraine" in the search bar

**Total Rounds:** 15

## Step 1 (2025-09-04T04:09:04.281266)

### Screenshots:

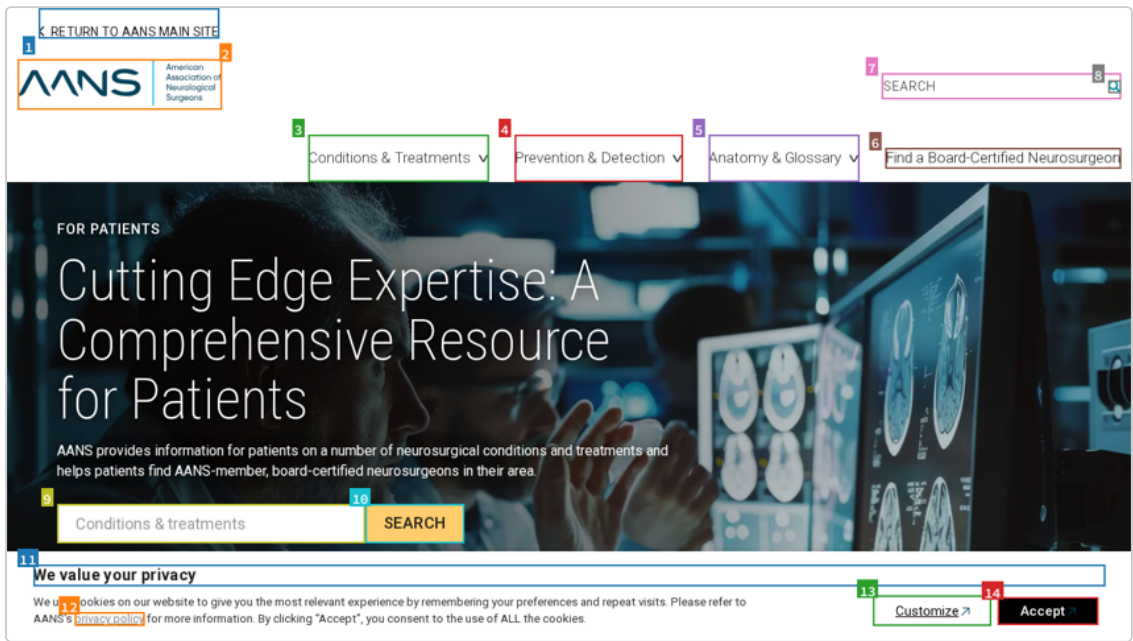

### Response:

```
```json
{
  "name": "type",
```

```
"arguments": {  
  "text": "Migraine",  
  "element_id": "10",  
  "field_description": "Conditions & treatments search input field",  
  "reasoning": "I need to search for information about Migraine"  
}  
}  
...
```

## Step 2 (2025-09-04T04:09:19.262863)

### Screenshots:

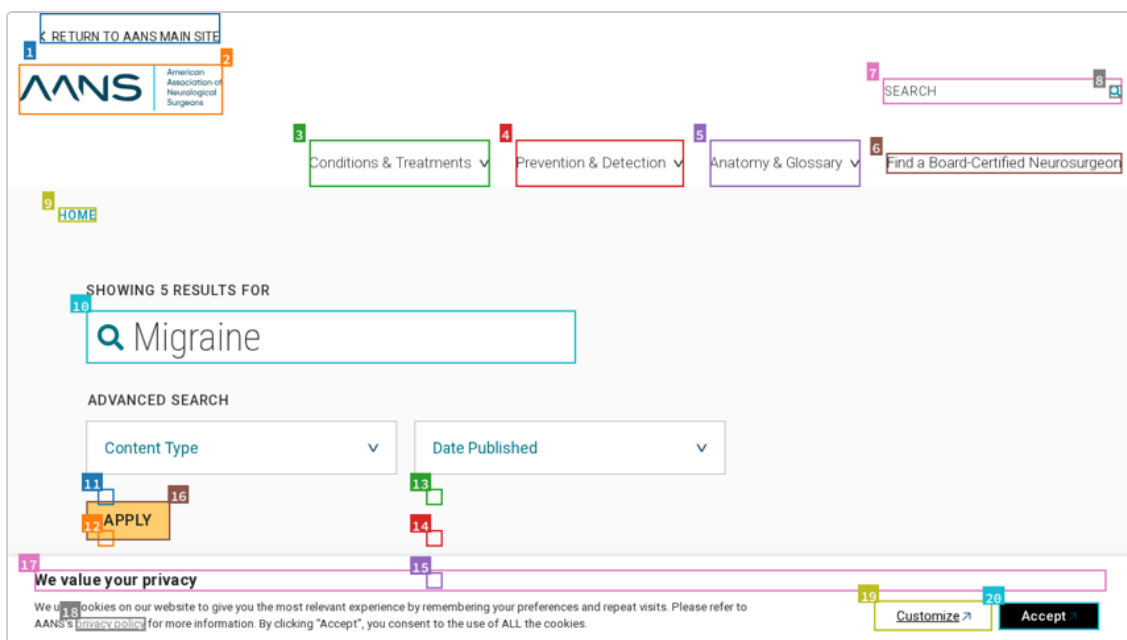

### Response:

```
```json  
{  
  "name": "click",  
  "arguments": {  
    "element_id": "8",
```

```
"description": "SEARCH button",
"reasoning": "Click the search button to initiate the search for
'Migraine'."
}
}
'''
```

### Step 3 (2025-09-04T04:09:31.355985)

#### Screenshots:

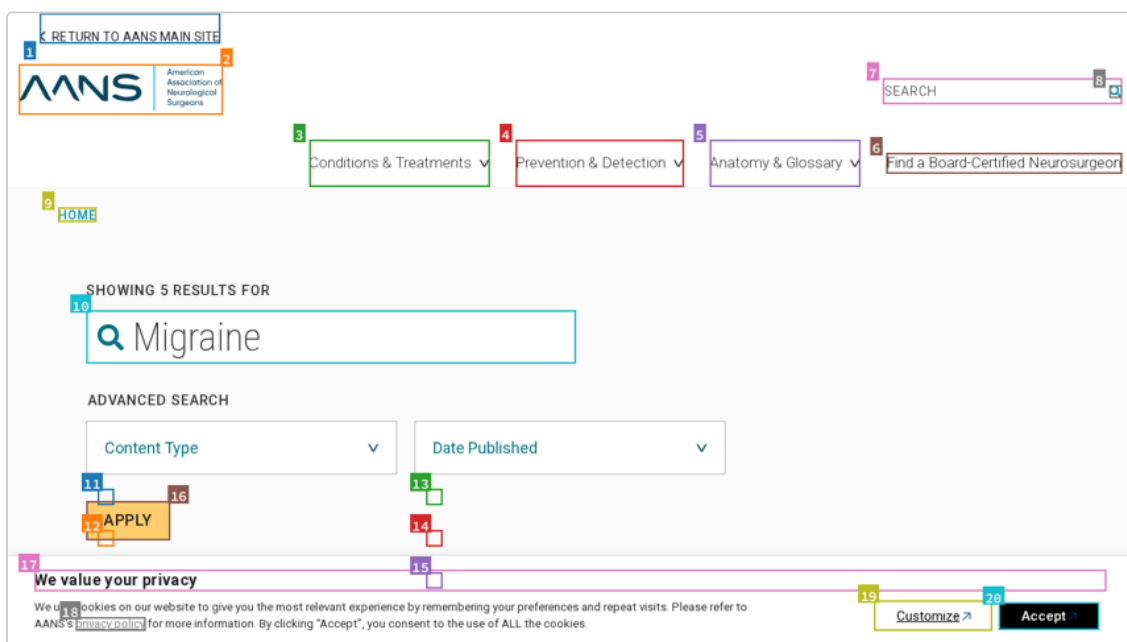

#### Response:

```
```json
{
  "name": "click",
  "arguments": {
    "element_id": "8",
    "description": "SEARCH button",
    "reasoning": "Click the search button to initiate the search for
```

```
'Migraine'."
```

```
}
```

```
}
```

```
...
```

## Step 4 (2025-09-04T04:09:45.142218)

### Screenshots:

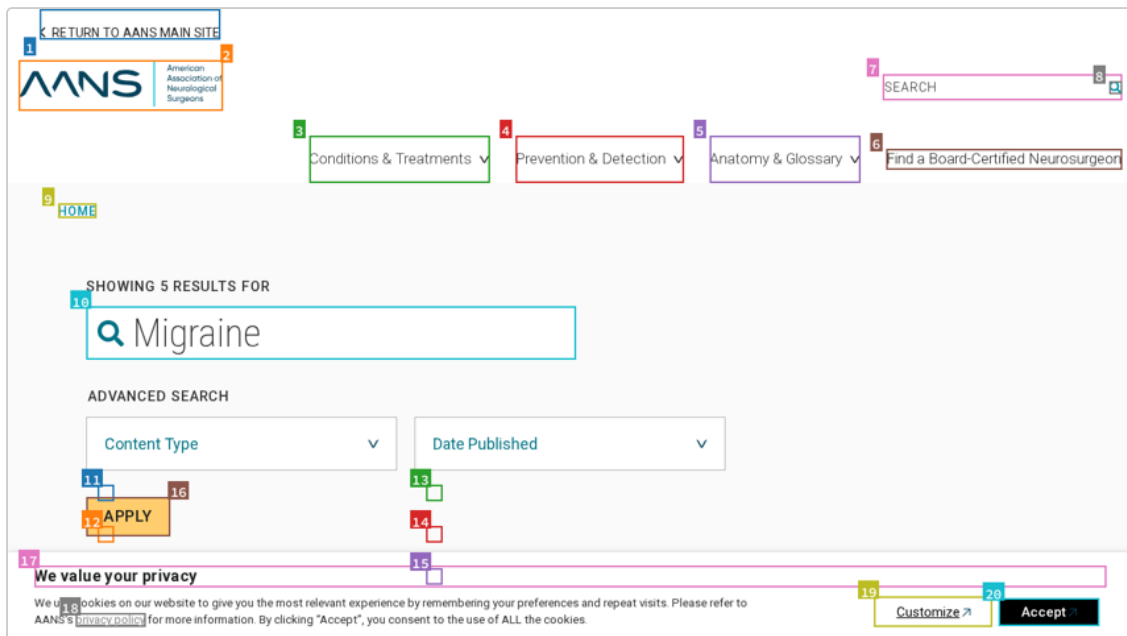

### Response:

```
```json
```

```
{
```

```
  "name": "click",
```

```
  "arguments": {
```

```
    "element_id": "8",
```

```
    "description": "SEARCH button",
```

```
    "reasoning": "Clicking the SEARCH button will initiate the search for  
'Migraine' and display the results."
```

```
  }
```

```
}  
...
```

## Step 5 (2025-09-04T04:09:57.599029)

### Screenshots:

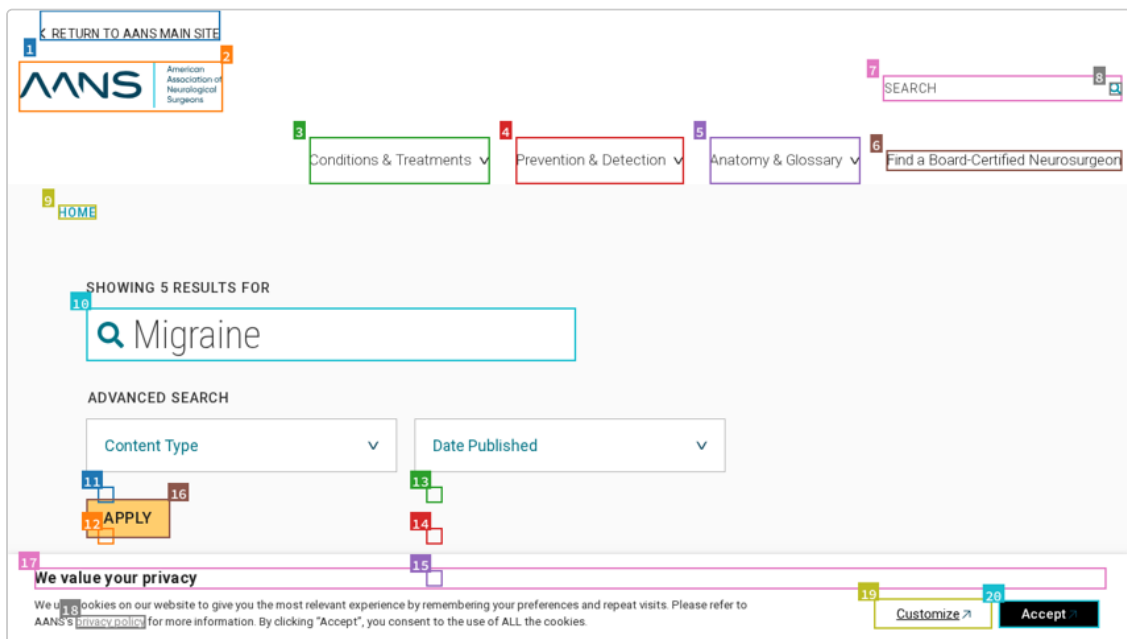

### Response:

```
```json  
{  
  "name": "click",  
  "arguments": {  
    "element_id": "8",  
    "coords": "1247 87",  
    "description": "SEARCH button",  
    "reasoning": "Click the search button to initiate the search for  
'Migraine'."  
  }  
}
```

```
}  
...  

```

## Step 6 (2025-09-04T04:10:09.216137)

### Screenshots:



### Response:

```
```json  
{  
  "name": "click",  
  "arguments": {  
    "element_id": "8",  
    "description": "SEARCH button",  
    "reasoning": "Click the SEARCH button to initiate the search for  
'Migraine'."  
  }  
}
```

```
}  
...
```

Step 7 (2025-09-04T04:10:21.699914)

## Screenshots:



## Response:

```
```json  
{  
  "name": "type",  
  "arguments": {  
    "text": "Migraine",  
    "element_id": "8",  
    "field_description": "search input field",  
    "reasoning": "I need to search for information about Migraine"  
  }  
}
```

```
}  
...
```

## Step 8 (2025-09-04T04:10:37.951554)

### Screenshots:

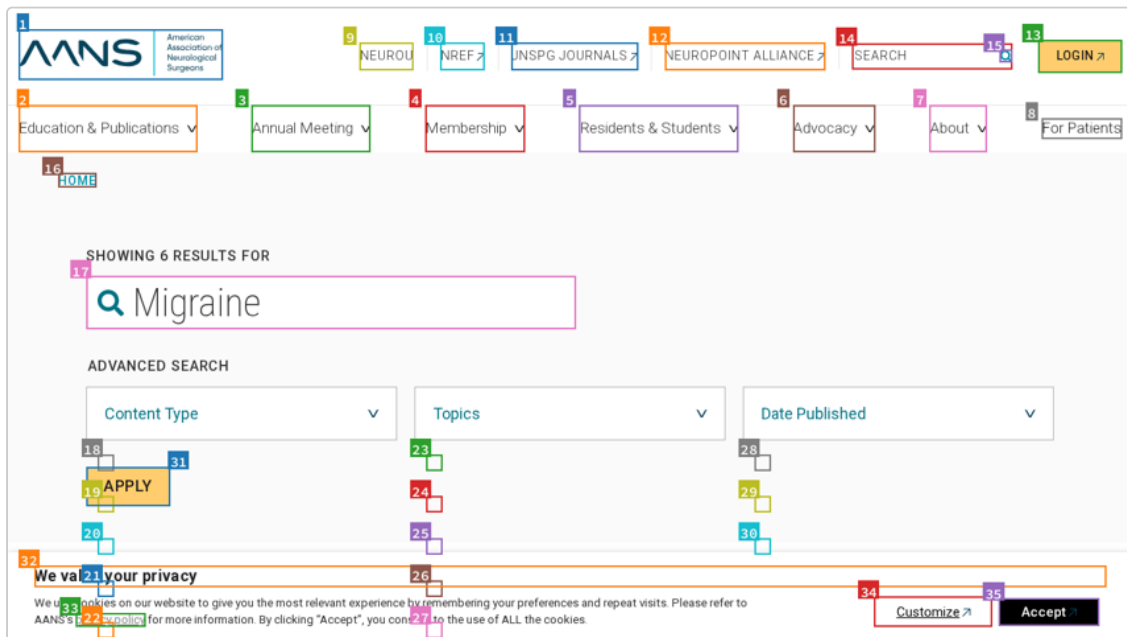

### Response:

```
```json  
{  
  "name": "click",  
  "arguments": {  
    "element_id": "17",  
    "description": "search bar containing 'Migraine'",  
    "reasoning": "Clicking the search bar to ensure focus before typing  
the search term"  
  }  
}
```



```
}  
...
```

## Step 9 (2025-09-04T04:10:50.682775)

### Screenshots:

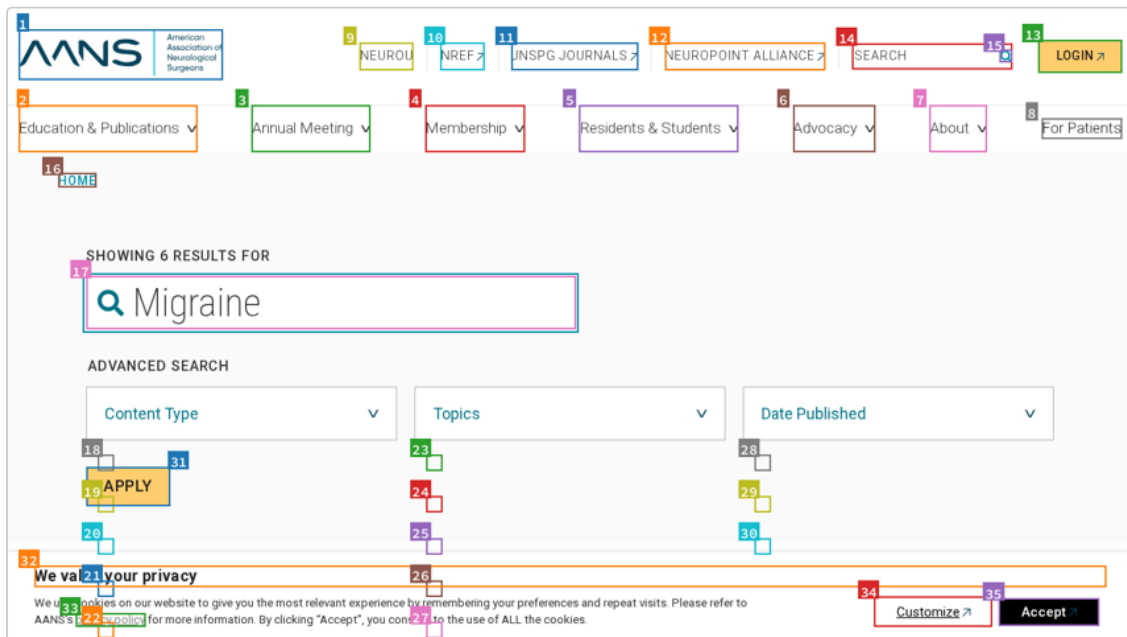

### Response:

```
```json  
{  
  "name": "click",  
  "arguments": {  
    "element_id": "14",  
    "description": "SEARCH button",  
    "reasoning": "Click the search button to execute the search for  
'Migraine'."  
  }  
}
```

```
}  
...
```

## Step 10 (2025-09-04T04:11:02.350759)

### Screenshots:

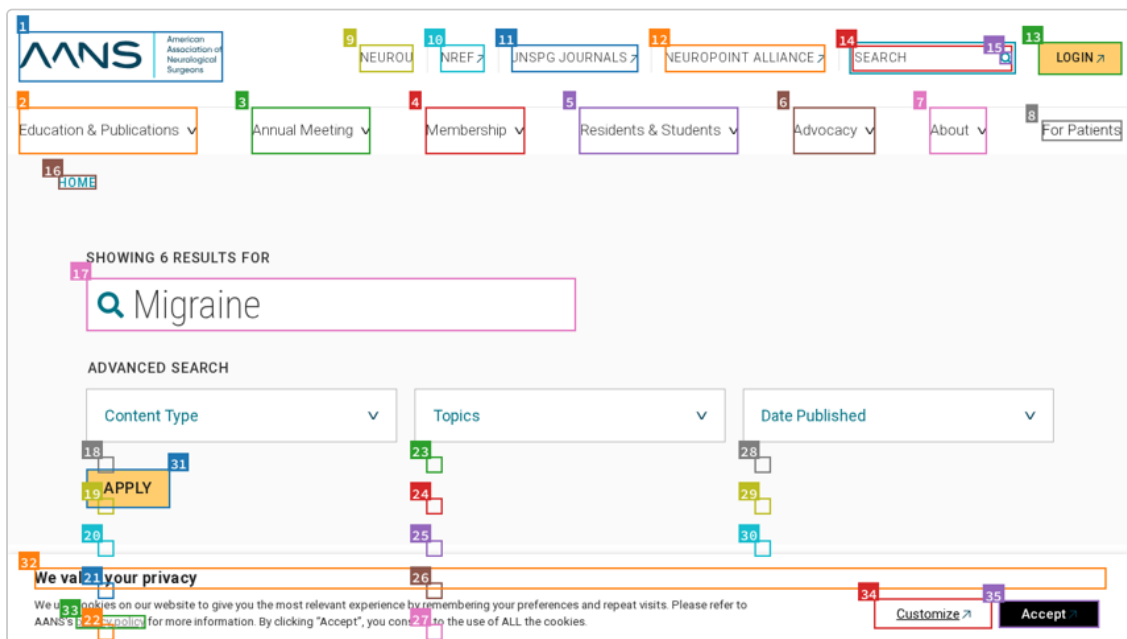

### Response:

```
```json  
{  
  "name": "click",  
  "arguments": {  
    "element_id": "15",  
    "description": "SEARCH button",  
    "reasoning": "Click the search button to initiate the search for  
'Migraine'."  
  }  
}
```

```
}  
...
```

## Step 11 (2025-09-04T04:11:15.510447)

### Screenshots:

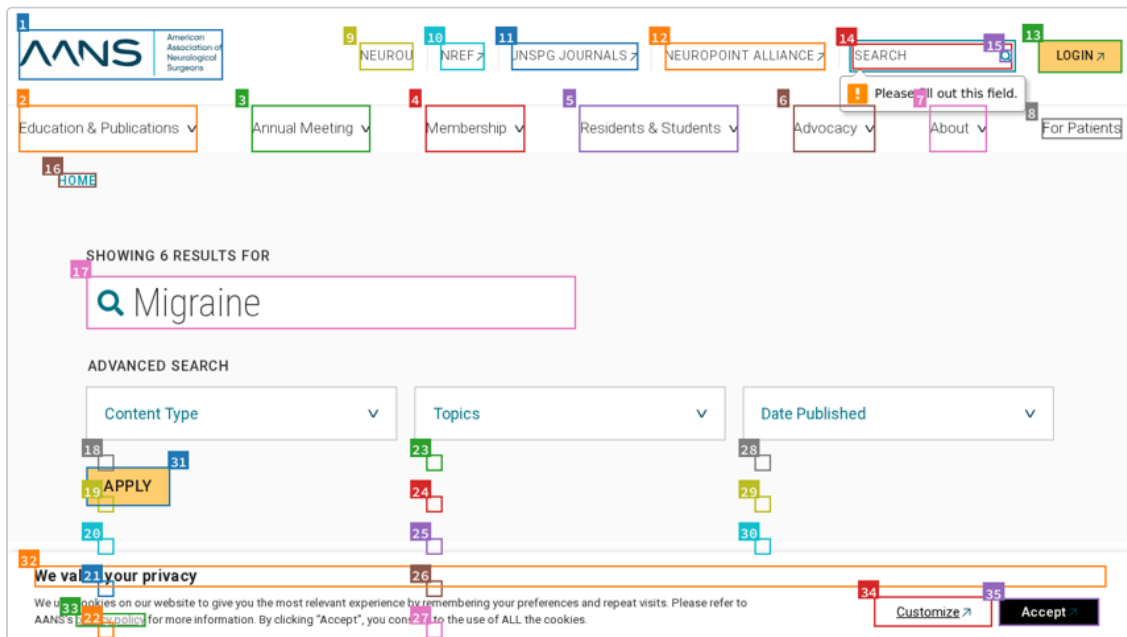

### Response:

```
```json  
{  
  "name": "click",  
  "arguments": {  
    "element_id": "15",  
    "description": "SEARCH button",  
    "reasoning": "Click the search button to initiate the search for  
'Migraine'."  
  }  
}
```

```
}  
...
```

## Step 12 (2025-09-04T04:11:28.697602)

### Screenshots:



### Response:

```
```json  
{  
  "name": "click",  
  "arguments": {  
    "element_id": "14",  
    "description": "SEARCH input field",  
    "reasoning": "I need to click on the search input field to start typing  
my search query."  
  }  
}
```

```
}  
...
```

## Step 13 (2025-09-04T04:11:42.845906)

### Screenshots:



### Response:

```
```json  
{  
  "name": "click",  
  "arguments": {  
    "element_id": "14",  
    "coords": "1050 50",  
    "description": "SEARCH button",  
    "reasoning": "Click the search button to initiate the search for  
'Migraine'."  
  }  
}
```

```
}  
...
```

## Step 14 (2025-09-04T04:11:55.403250)

### Screenshots:



### Response:

```
```json  
{  
  "name": "click",  
  "arguments": {  
    "element_id": "15",  
    "description": "SEARCH button",  
    "reasoning": "Click the search button to initiate the search for  
'Migraine'."  
  }  
}
```

```
}  
...
```

## Step 15 (2025-09-04T04:12:09.866986)

### Screenshots:

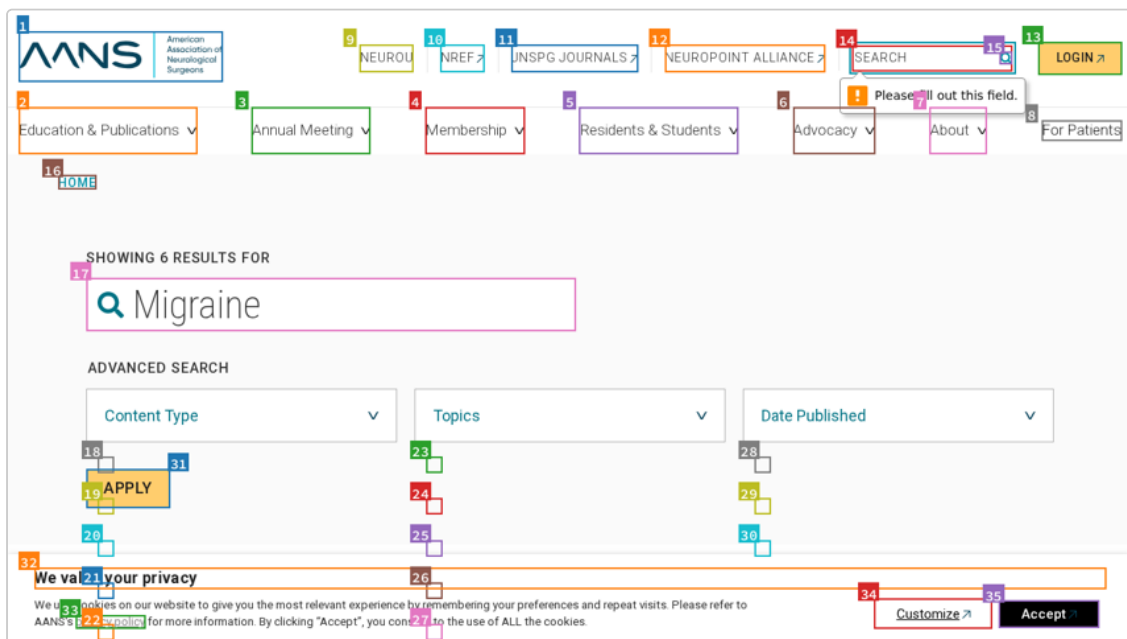

### Response:

```
```json  
{  
  "name": "stop",  
  "arguments": {  
    "answer": "The search for 'Migraine' has been successfully executed,  
showing 6 results. No further actions are needed.",  
    "reasoning": "The search term 'Migraine' has already been entered, and  
the page displays 6 results. The task of searching is complete."  
  }  
}
```

```
}  
...
```
