# Supplementary material
Source: ML conference proceedings conference paper supplement (https://openreview.net/forum?id=cvAZKWA1HZ)
Supplement: supplementary_material [file health_tasks_health_387.pdf › supplementary_materials/trajectory_evaluation/health_tasks_health_387.pdf]

# Task Report

Session ID: health\_tasks\_health\_387

Task Description: Read an article on the potential side effects of a common medication

Total Rounds: 6

## Step 1 (2025-09-04T16:54:01.500121)

### Screenshots:

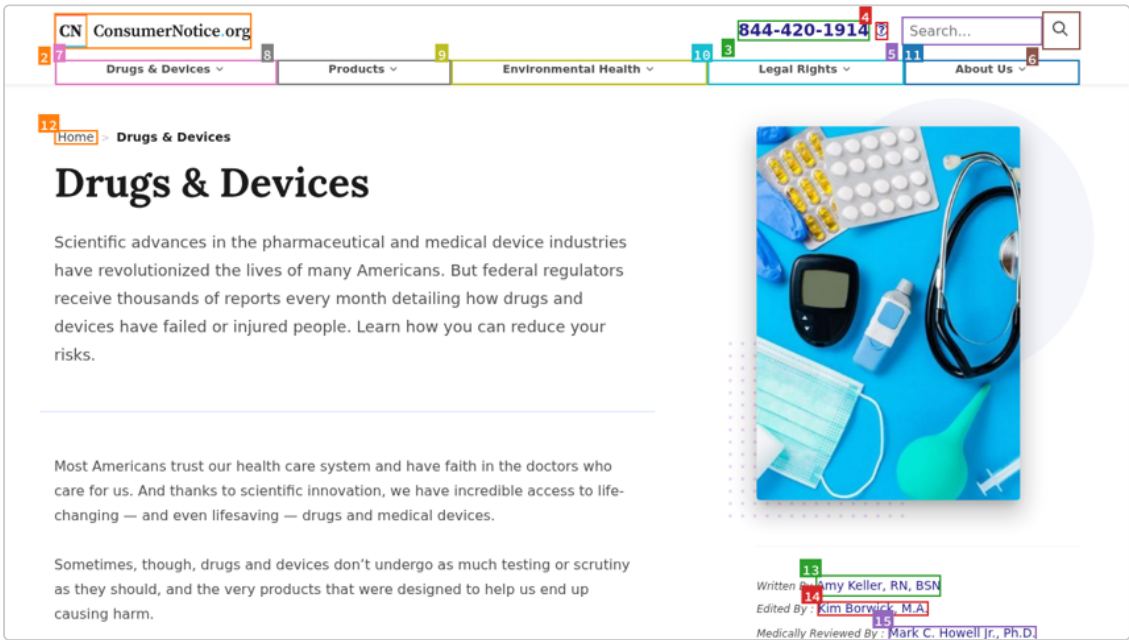

### Response:

To find an article on the potential side effects of a common medication, I'll start by using the search functionality available on the page. This will help

me locate relevant information efficiently.

**\*\*Action:\*\***

```
```json
{
  "name": "type",
  "arguments": {
    "text": "side effects of common medications",
    "element_id": "4",
    "field_description": "search input field",
    "reasoning": "I need to search for articles on the side effects of common medications"
  }
}
```
```

## Step 2 (2025-09-04T16:54:18.409165)

### Screenshots:

The screenshot displays the ConsumerNotice.org website. The navigation bar includes links for 'CN ConsumerNotice.org', 'Drugs & Devices', 'Products', 'Environmental Health', 'Legal Rights', and 'About Us'. A search bar is located in the top right corner. Below the navigation bar, the 'Search' section is visible, with the search input field containing the text 'side effects of common medications'. The search results section is titled 'Search Results for "side effects of common medications"'. The first result is 'Acid Reflux and GERD Medicine | Common Medications, Safety', with a URL that includes 'https://www.consumernotice.org/drugs-and-devices/acid-reflux-medicine/'. The date 'Jul 24, 2023' is also visible.

## Response:

Thought: The search results show an article related to acid reflux and GERD medications, which could contain information about side effects. I should click on this article to read more about the potential side effects of common medications.

Action:

```
```json
{
  "name": "click",
  "arguments": {
    "element_id": "14",
    "description": "Acid Reflux and GERD Medicine | Common Medications, Safety",
    "reasoning": "Clicking on this article will allow me to read about the side effects of common medications"
  }
}
```
```

**Step 3** (2025-09-04T16:54:32.504913)

## Screenshots:

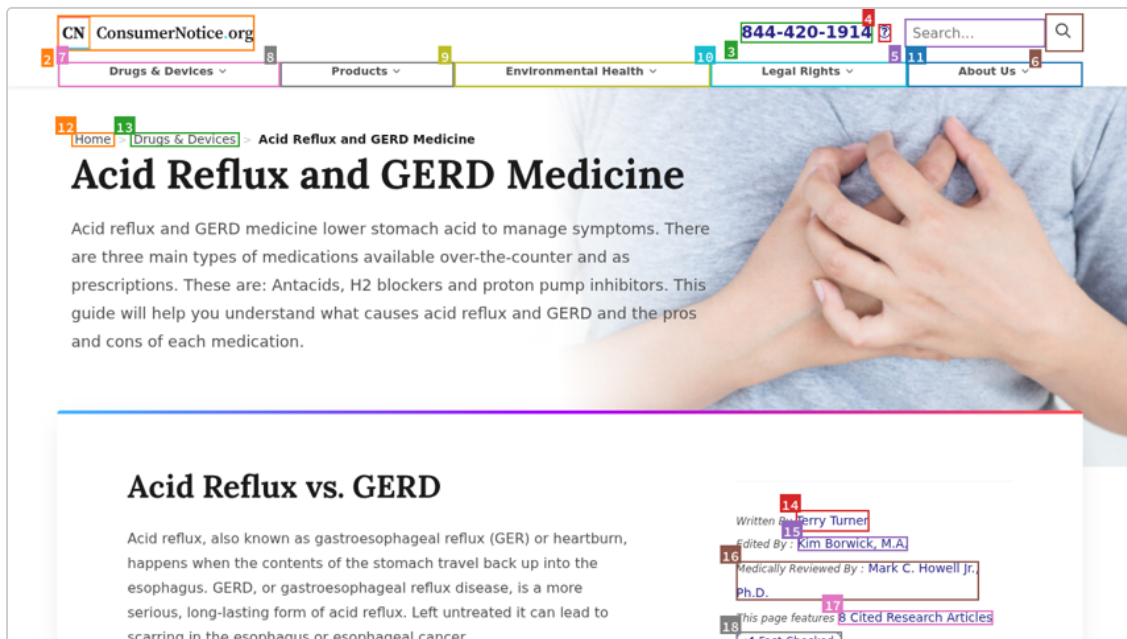

## Response:

To find information about the potential side effects of a common medication, I'll start by exploring the page for relevant sections or links that might discuss side effects. Since the current view doesn't show detailed information about side effects, I'll scroll down to uncover more content.

**\*\*Action:\*\***

```json

{

  "name": "scroll",

  "arguments": {

    "direction": "down",

    "reasoning": "Scrolling down to find more detailed information about side effects of medications"

  }

}

```

## Screenshots:

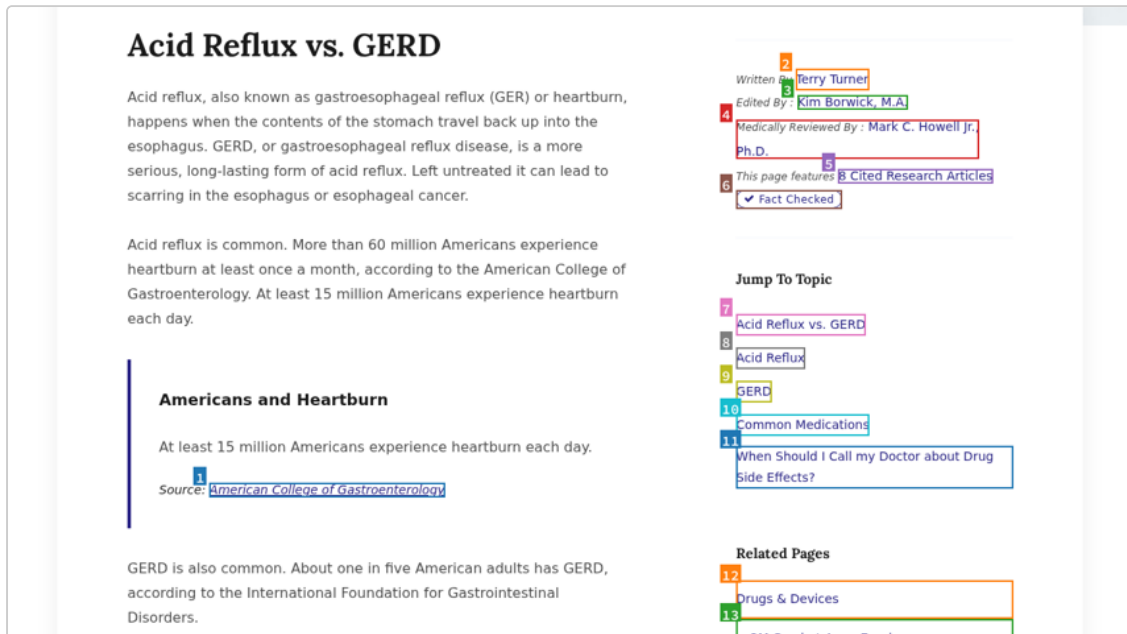

## Response:

To find information on the potential side effects of a common medication, I should navigate to the relevant section of the webpage. The "Jump To Topic" menu includes an option labeled "Common Medications," which likely contains information about medications and their side effects.

**\*\*Action:\*\***

```json

```
{
  "name": "click",
  "arguments": {
    "element_id": "10",
    "description": "Common Medications link in the Jump To Topic menu",
    "reasoning": "Clicking this link will likely lead to information about common medications and their side effects."
  }
}
```

```
}  
...  

```

Step 5 (2025-09-04T16:55:01.211658)

## Screenshots:

### Common Medications for Acid Reflux and GERD

If diet and lifestyle choices don't improve your acid reflux and GERD symptoms, a doctor may recommend medication. Acid reflux and GERD medicine is available over-the-counter (OTC) and by prescription.

These medications come in three main types: antacids, H2 blockers and [proton pump inhibitors or PPIs](#).

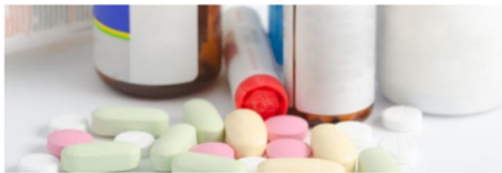

"Many people who have mild or intermittent symptoms of reflux may be able to take over-the-counter treatments alone. Frankly, patients can often self-manage that with little to no clinical input, but many other patients may have more severe GERD symptoms or more complex GI disease, such as gastritis or erosive esophagitis or gastrointestinal ulcers — which we don't see often, but they still can

## Response:

Thought: To find information about the potential side effects of a common medication, I need to explore the page further. Since there is no direct mention of side effects in the visible section, I'll scroll down to look for more detailed information.

Action:

```
```json
```

```
{  
  "name": "scroll",  
  "arguments": {  
    "direction": "down",  

```

"reasoning": "Scrolling down to find information about the potential side effects of common medications for acid reflux and GERD"

}  
}  
...

Step 6 (2025-09-04T16:55:16.963923)

## Screenshots:

"Many people who have mild or intermittent symptoms of reflux may be able to take over-the-counter treatments alone. Frankly, patients can often self-manage that with little to no clinical input, but many other patients may have more severe GERD symptoms or more complex GI disease, such as gastritis or erosive esophagitis or gastrointestinal ulcers — which we don't see often, but they still can occur — are times when a prescription treatment makes more sense," said Alexander.

### Common Medications for Acid Reflux

| MEDICATION TYPE                           | HOW LONG THEY WORK                                  | OTC OR PRESCRIPTION                                                  | COMMON SIDE EFFECTS                                      |
|-------------------------------------------|-----------------------------------------------------|----------------------------------------------------------------------|----------------------------------------------------------|
| Antacids – Tums, Rolaids, Mylanta, Maalox | They work in about five minutes but only last 30 to | OTC for mild heartburn. They're not intended to treat GERD or severe | Mild side effects such as nausea, diarrhea, constipation |

## Response:

To gather information about the potential side effects of a common medication, I'll focus on the table provided in the image. The table lists medications along with their side effects. Since the question asks for side effects, I'll examine the "COMMON SIDE EFFECTS" column for relevant details.

### Reasoning:

The table already provides information on common side effects for

antacids. I can extract this information directly from the table without needing additional interactions.

### Action:

Since the required information is visible in the table, I can proceed to stop and provide the answer based on the observed data.

```
```json
{
  "name": "stop",
  "arguments": {
    "answer": "The common side effects of antacids, such as Tums, Roloids, Mylanta, and Maalox, include mild side effects such as nausea, diarrhea, and constipation.",
    "reasoning": "The table explicitly lists common side effects for antacids under the 'COMMON SIDE EFFECTS' column."
  }
}
```
```
