# Supplementary material
Source: ML conference proceedings conference paper supplement (https://openreview.net/forum?id=cvAZKWA1HZ)
Supplement: supplementary_material [file health_tasks_health_V71_595.pdf › supplementary_materials/trajectory_evaluation/health_tasks_health_V71_595.pdf]

# Task Report

**Session ID:** health\_tasks\_health\_V71\_595

**Task Description:** Identify the contact details for the endocrinology department

**Total Rounds:** 10

**Step 1** (2025-10-07T11:58:47.241232)

## Screenshots:

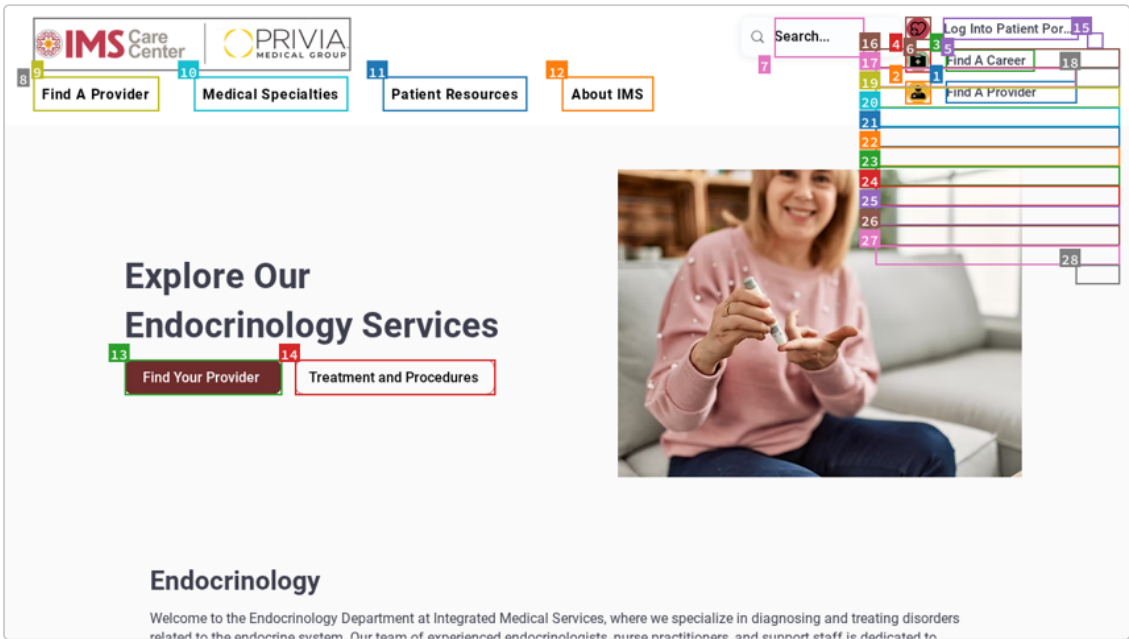

## Response:

To find the contact details for the endocrinology department, I need to explore the page further. Since the current view doesn't show contact information, I'll scroll down to see if there are more details available.

Action:

```
```json
```

```
{
```

```
  "name": "scroll",
```

```
  "arguments": {
```

```
    "direction": "down",
```

```
    "reasoning": "I need to scroll down to find the contact details for the  
endocrinology department, as they are not visible in the current view."
```

```
  }
```

```
}
```

```
```
```

## Step 2 (2025-10-07T11:58:56.890289)

### Screenshots:

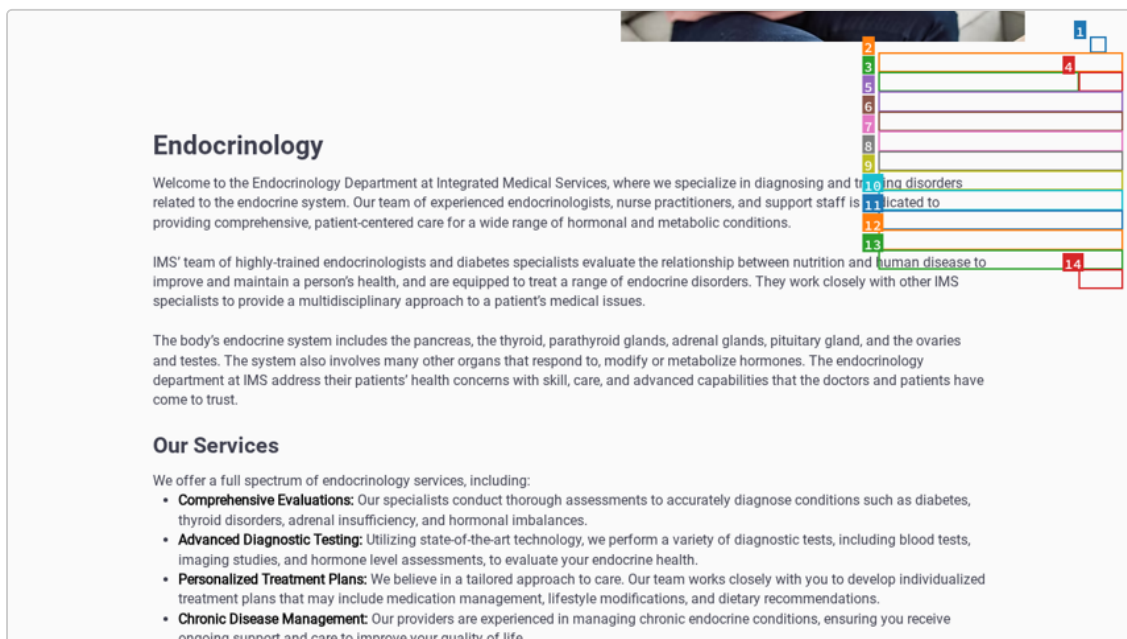

**Endocrinology**

Welcome to the Endocrinology Department at Integrated Medical Services, where we specialize in diagnosing and treating endocrine disorders related to the endocrine system. Our team of experienced endocrinologists, nurse practitioners, and support staff is dedicated to providing comprehensive, patient-centered care for a wide range of hormonal and metabolic conditions.

IMS' team of highly-trained endocrinologists and diabetes specialists evaluate the relationship between nutrition and human disease to improve and maintain a person's health, and are equipped to treat a range of endocrine disorders. They work closely with other IMS specialists to provide a multidisciplinary approach to a patient's medical issues.

The body's endocrine system includes the pancreas, the thyroid, parathyroid glands, adrenal glands, pituitary gland, and the ovaries and testes. The system also involves many other organs that respond to, modify or metabolize hormones. The endocrinology department at IMS address their patients' health concerns with skill, care, and advanced capabilities that the doctors and patients have come to trust.

**Our Services**

We offer a full spectrum of endocrinology services, including:

- **Comprehensive Evaluations:** Our specialists conduct thorough assessments to accurately diagnose conditions such as diabetes, thyroid disorders, adrenal insufficiency, and hormonal imbalances.
- **Advanced Diagnostic Testing:** Utilizing state-of-the-art technology, we perform a variety of diagnostic tests, including blood tests, imaging studies, and hormone level assessments, to evaluate your endocrine health.
- **Personalized Treatment Plans:** We believe in a tailored approach to care. Our team works closely with you to develop individualized treatment plans that may include medication management, lifestyle modifications, and dietary recommendations.
- **Chronic Disease Management:** Our providers are experienced in managing chronic endocrine conditions, ensuring you receive ongoing support and care to improve your quality of life.

Response:

Thought: To find the contact details for the endocrinology department, I need to scroll down the page as the current view does not show any contact information. The contact details are likely located further down the page.

Action: `{{"name": "scroll", "arguments": {"direction": "down", "reasoning": "I need to scroll down to find the contact details for the endocrinology department."}}}`

Step 3 (2025-10-07T11:59:04.993855)

Screenshots:

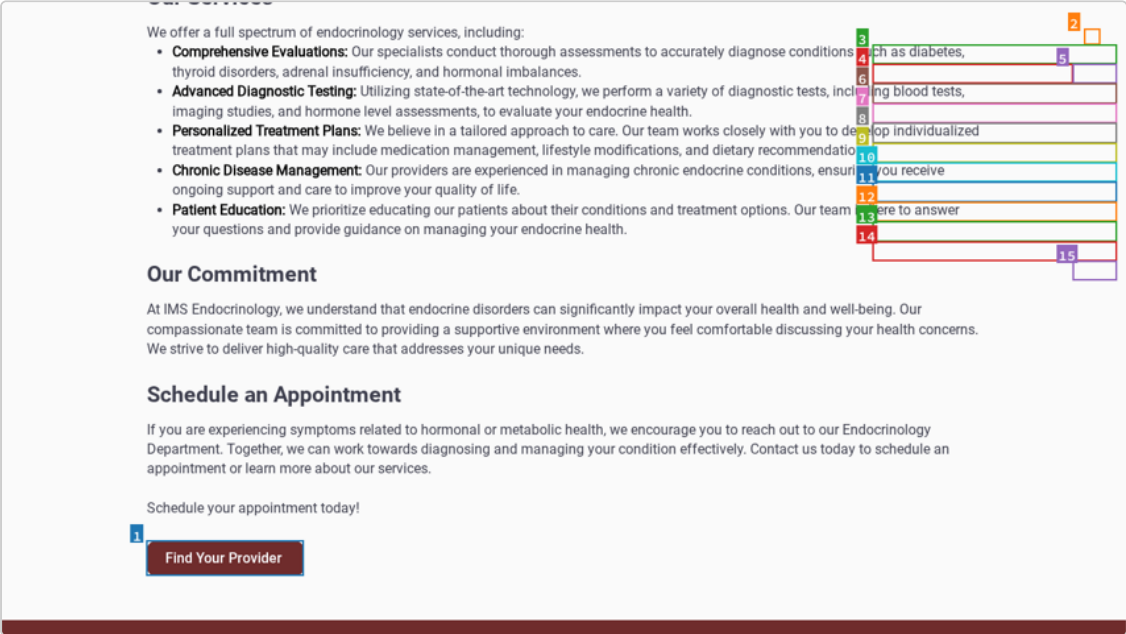

Response:

To find the contact details for the endocrinology department, I need to explore the page further. Since the current visible content doesn't show

...

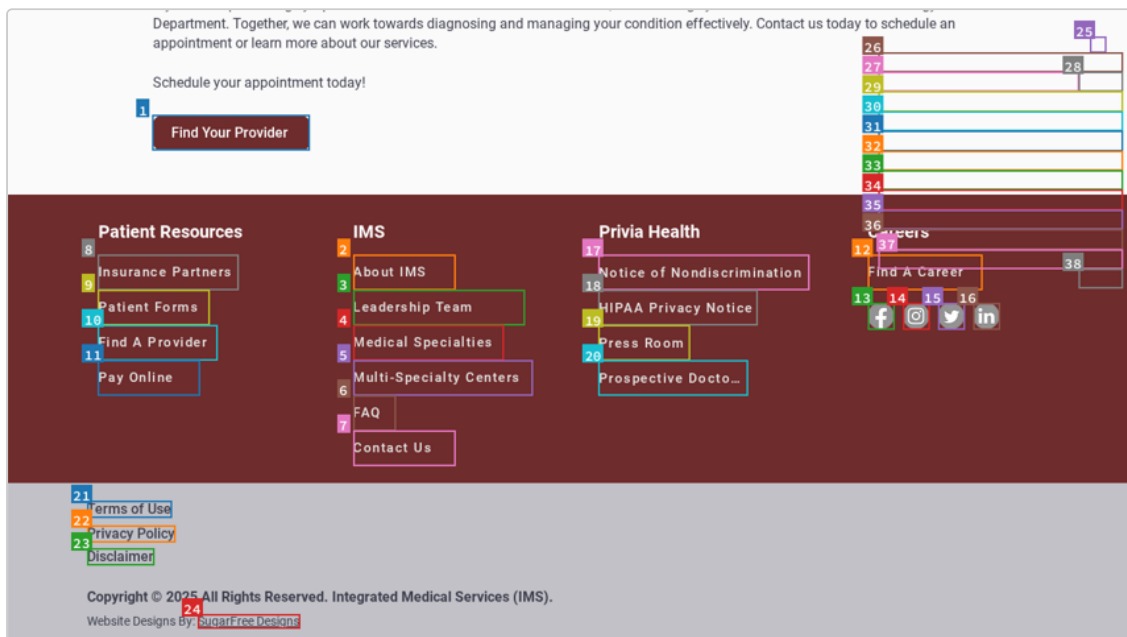

## Response:

To find the contact details for the endocrinology department, I need to explore the "Medical Specialties" section, as it is likely to contain information about different medical departments, including endocrinology.

**\*\*Reasoning:\*\*** The "Medical Specialties" link (element\_id: 5) is a logical starting point since it is directly related to different medical departments. Clicking this link should lead to a page where I can find more specific information about endocrinology and its contact details.

**\*\*Action:\*\*** Click on the "Medical Specialties" link to explore the available medical departments.

```
```json
{
  "name": "click",
  "arguments": {
    "element_id": "5",
    "description": "Medical Specialties link",
    "reasoning": "Exploring medical specialties to find endocrinology contact details"
  }
}
```
```

**Step 5 (2025-10-07T11:59:37.413886)**

## Screenshots:

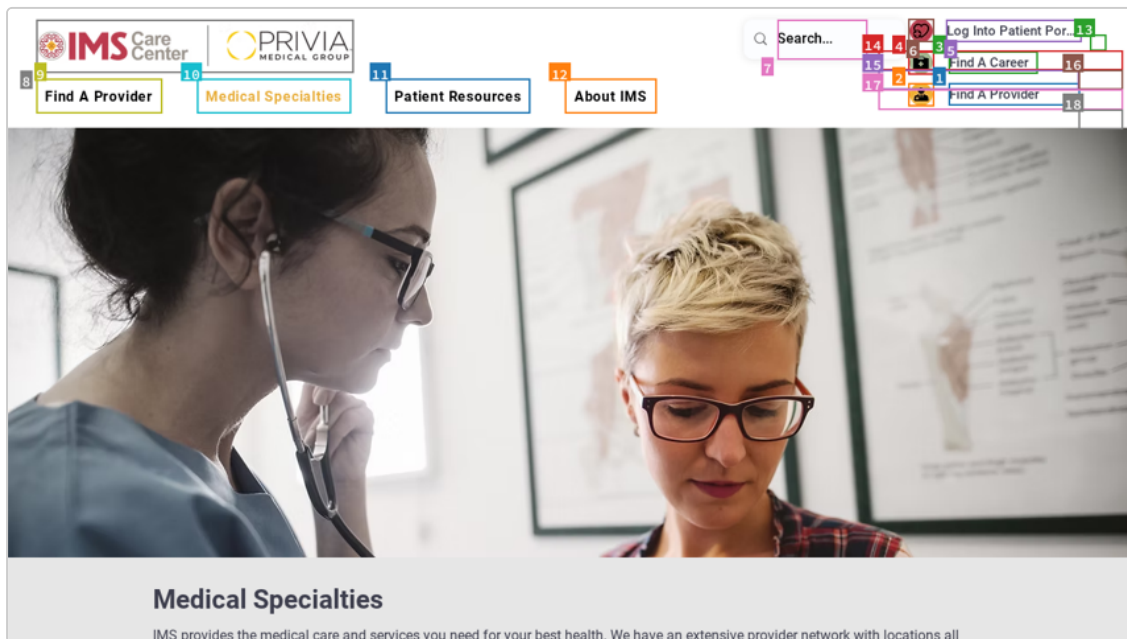

## Response:

To find the contact details for the endocrinology department, I should start by searching for "endocrinology" on the website. This will help me locate the relevant department page or contact information.

**\*\*Action:\*\***

```
```json
```

```
{
  "name": "type",
  "arguments": {
    "text": "endocrinology",
    "element_id": "7",
    "field_description": "search input field",
    "reasoning": "I need to search for the endocrinology department to find contact details"
  }
}
```

## Screenshots:

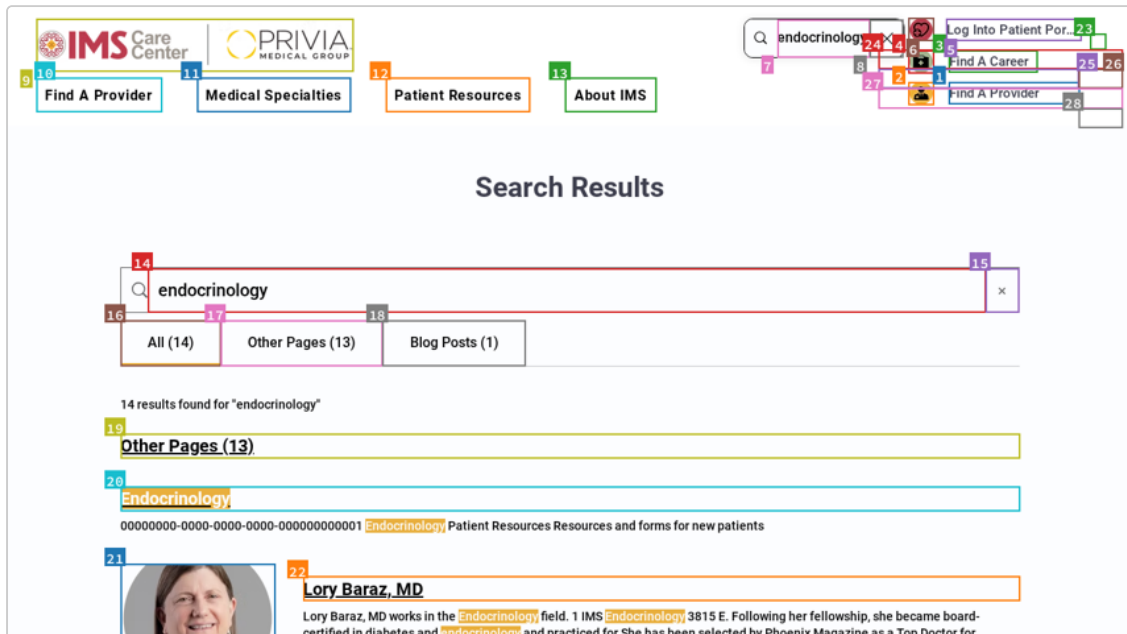

## Response:

To identify the contact details for the endocrinology department, I need to explore the search results further. The highlighted result "Endocrinology" (20) seems promising as it mentions patient resources and forms for new patients, which might include contact information.

### ### Reasoning:

1. The search result "Endocrinology" (20) is likely to contain relevant information about the endocrinology department, including contact details.
2. Clicking on this result will allow me to access more detailed information.

### ### Action:

I will click on the "Endocrinology" result to explore the page for contact details.

```json

```
{
  "name": "click",
  "arguments": {
    "element_id": "20",
    "description": "Endocrinology result link",
    "reasoning": "Clicking this result will likely lead to a page with contact
details for the endocrinology department."
  }
}
'''
```

## Step 7 (2025-10-07T12:00:22.530987)

### Screenshots:

The screenshot shows the IMS Care Center website with a search bar at the top right containing the text "endocrinology". Below the search bar, the search results are displayed. The results include a section for "Search Results" with a search bar and filters. The filters show "All (14)", "Other Pages (13)", and "Blog Posts (1)". Below the filters, the results are listed, starting with "Other Pages (13)" and "Endocrinology". The "Endocrinology" result is highlighted in blue. Below the "Endocrinology" result, there is a section for "Lory Baraz, MD" with a photo and a brief biography.

### Response:

To identify the contact details for the endocrinology department, I need to explore the search results further. The "Other Pages (13)" section seems promising as it likely contains resources and forms related to



endocrinology. I will click on the "Other Pages (13)" link to see if it leads to contact information.

**\*\*Action:\*\***

```json

```
{
  "name": "click",
  "arguments": {
    "element_id": "19",
    "description": "Other Pages (13)",
    "reasoning": "Clicking this link may lead to resources or forms that include contact details for the endocrinology department."
  }
}
```

## Step 8 (2025-10-07T12:00:41.281755)

### Screenshots:

The screenshot shows the IMS Care Center website with a search bar at the top right containing the text "endocrinology". Below the search bar, there are navigation links: "Find A Provider", "Medical Specialties", "Patient Resources", and "About IMS". The search results section is titled "Search Results" and displays a search bar with "endocrinology" entered. Below the search bar, there are three tabs: "All (14)", "Other Pages (13)", and "Blog Posts (1)". The "Other Pages (13)" tab is selected. Below the tabs, there is a message: "13 results found for 'endocrinology'". The first result is titled "Endocrinology" and has a description: "00000000-0000-0000-0000-000000000001 Endocrinology Patient Resources Resources and forms for new patients". Below the first result, there is a profile picture of Lory Baraz, MD, and a bio: "Lory Baraz, MD works in the Endocrinology field. 1 IMS Endocrinology 3815 E. Following her fellowship, she became board-certified in diabetes and endocrinology and practiced for She has been selected by Phoenix Magazine as a Top Doctor for Endocrinology multiple times. Dr. Languages English Phone Number (602) 494-5040 Area Of Focus Endocrinology Book An...".

## Response:

To identify the contact details for the endocrinology department, I should first click on the relevant result that seems to provide general resources or contact information. The first result titled "Endocrinology" (element 20) appears to be a general resource page, which might contain contact details.

**\*\*Action:\*\***

```json

{

"name": "click",

"arguments": {

"element\_id": "20",

"description": "Endocrinology resource link",

"reasoning": "Clicking this link may lead to a page with contact details for the endocrinology department."

}

}

```

**Step 9** (2025-10-07T12:01:01.459137)

## Screenshots:

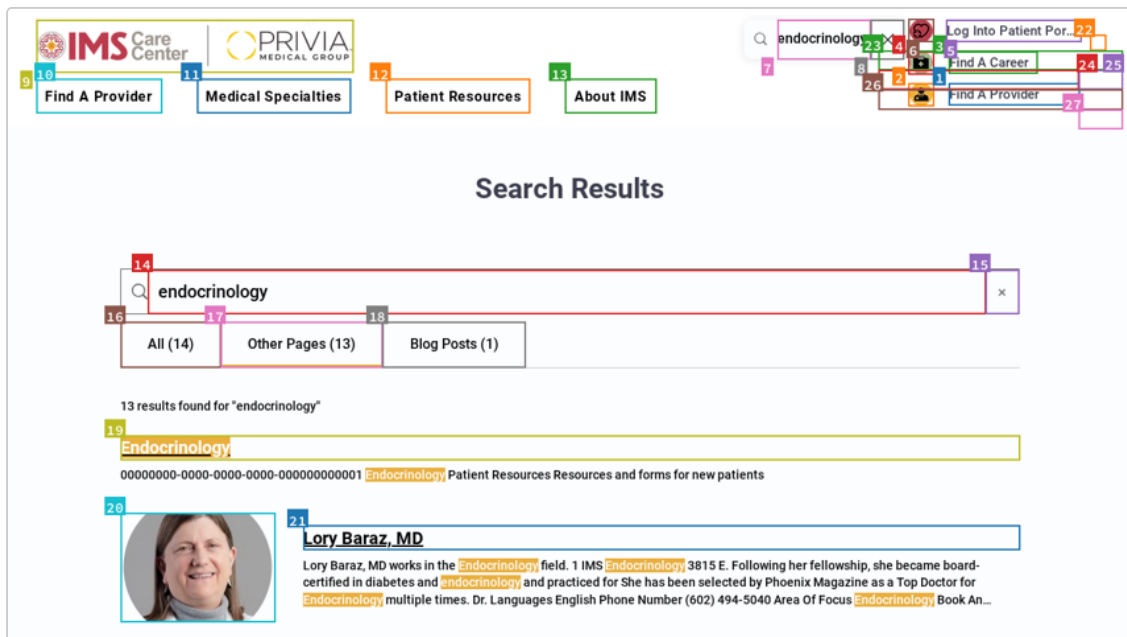

## Response:

To identify the contact details for the endocrinology department, I should first click on the top result titled "Endocrinology" (20) to explore more details. This link likely leads to a page with relevant information, including contact details.

**\*\*Action:\*\***

```json

{

"name": "click",

"arguments": {

"element\_id": "20",

"description": "Endocrinology link",

"reasoning": "Clicking this link will likely lead to a page with contact details for the endocrinology department."

}

}

```

## Screenshots:

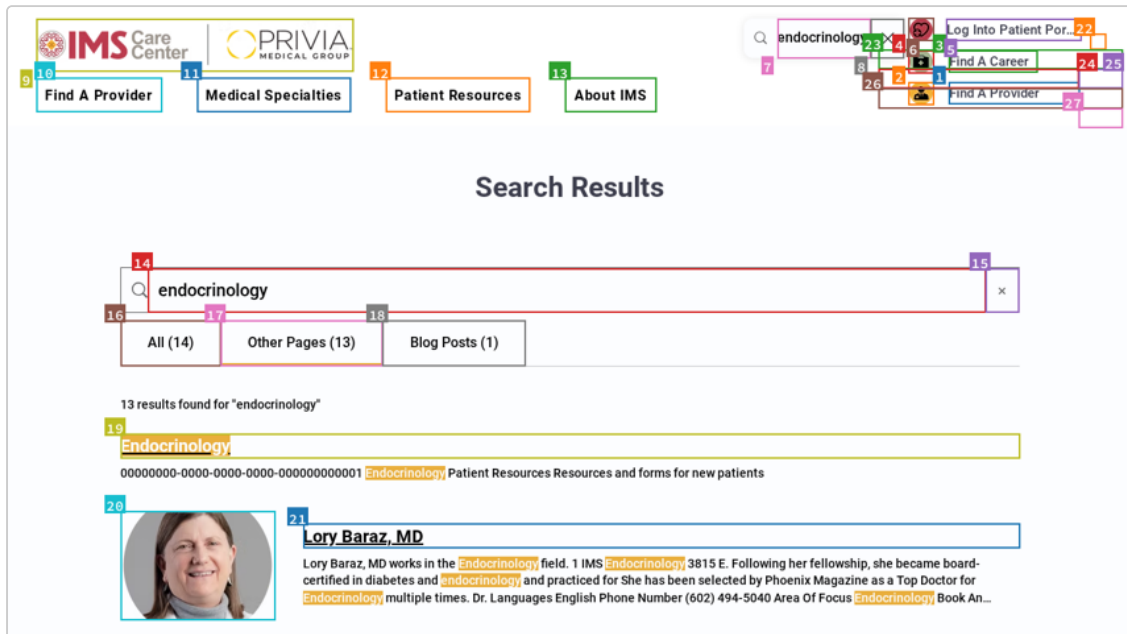

## Response:

```
```json
{
  "name": "stop",
  "arguments": {
    "answer": "The contact details for the endocrinology department are as follows: Dr. Lory Baraz, MD, works in the Endocrinology field. Her phone number is (602) 494-5040, and her area of focus is Endocrinology. You can book an appointment with her using the provided information.",
    "reasoning": "The search results page already displays the contact details for the endocrinology department, including the doctor's name, specialty, and contact information. No further actions are needed to obtain this information."
  }
}
```

```
}  
...
```
