# Supplementary material
Source: ML conference proceedings conference paper supplement (https://openreview.net/forum?id=cvAZKWA1HZ)
Supplement: supplementary_material [file health_tasks_health_V71_718.pdf › supplementary_materials/trajectory_evaluation/health_tasks_health_V71_718.pdf]

# Task Report

Session ID: health\_tasks\_health\_V71\_718

Task Description: Find the dosage information for Amoxicillin

Total Rounds: 6

Step 1 (2025-10-07T14:59:32.130164)

## Screenshots:

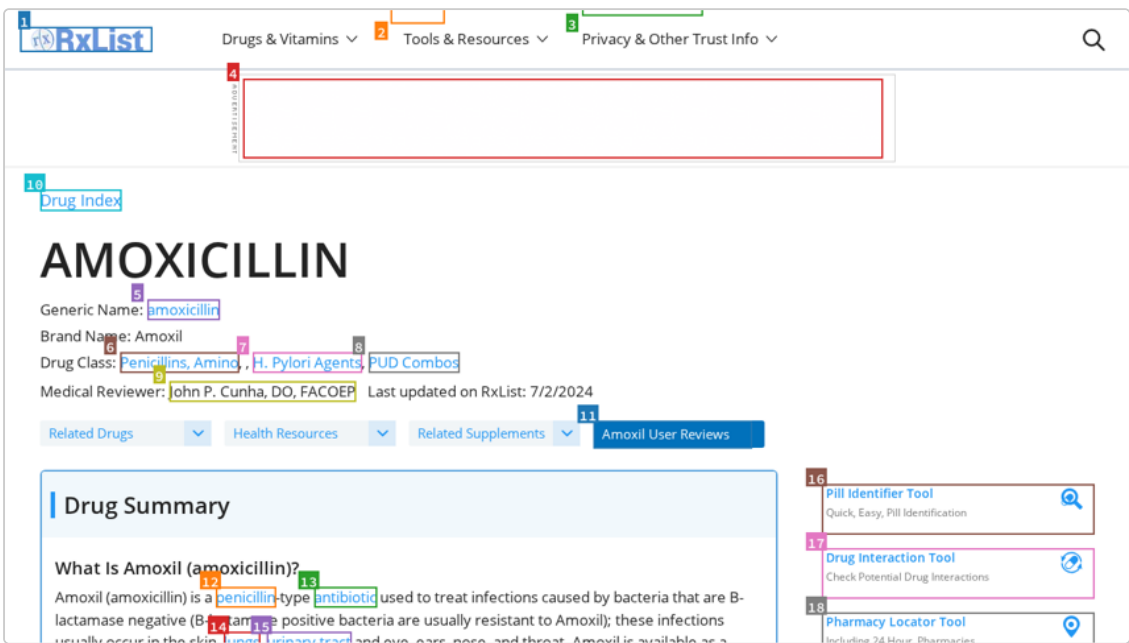

## Response:

To find the dosage information for Amoxicillin, I need to scroll down the page as it is not visible in the current view. The dosage information is typically found in sections like "Dosage," "How to Use," or similar, which

are likely below the visible content.

**\*\*Action:\*\***

```
```json
```

```
{
```

```
  "name": "scroll",
```

```
  "arguments": {
```

```
    "direction": "down",
```

```
    "reasoning": "I need to scroll down to find the dosage information for Amoxicillin, which is not visible in the current view."
```

```
  }
```

```
}
```

```
```
```

## Step 2 (2025-10-07T14:59:46.636569)

### Screenshots:

The screenshot shows the RxList website. The navigation bar at the top includes 'Drugs & Vitamins', 'Tools & Resources', and 'Privacy & Other Trust Info'. The main content area is titled 'Amoxicillin (amoxicillin)'. It includes a paragraph about its use for various infections and a section titled 'What Are Side Effects of Amoxicil (amoxicillin)?'. Under this section, it lists common side effects: nausea, vomiting, diarrhea, stomach pain, vaginal itching or discharge, headache, rash, and swollen, black, or "hairy" tongue. A 'Pharmacy Locator Tool' is visible on the right side of the page.

lactamase negative (B-lactamase positive bacteria are usually resistant to Amoxicil); these infections usually occur in the skin, lungs, urinary tract and eye, ears, nose, and throat. Amoxicil is available as a [combination drug](#) termed amoxicillin. Amoxicil may be combined with other drugs (for example, clavulanic acid [[Augmentin](#)]), to make the antibiotic more effective.

**What Are Side Effects of Amoxicil (amoxicillin)?**

Common side effects of Amoxicil include:

- nausea
- vomiting
- diarrhea
- stomach pain
- vaginal itching or [discharge](#)
- headache
- rash, and
- swollen, black, or "hairy" tongue.

Other serious side effects of Amoxicil include:

[Pharmacy Locator Tool](#)  
Including 24 Hour, Pharmacies

## Response:

To find the dosage information for Amoxicillin, I need to scroll down the page as the current view only shows side effects and general information. Dosage details are typically located further down on such pages.

**\*\*Action:\*\***

```
```json
```

```
{
```

```
  "name": "scroll",
```

```
  "arguments": {
```

```
    "direction": "down",
```

```
    "reasoning": "I need to scroll down to find the dosage information for  
Amoxicillin, as it is not visible in the current view."
```

```
  }
```

```
}
```

```
```
```

**Step 3 (2025-10-07T14:59:55.409953)**

Screenshots:

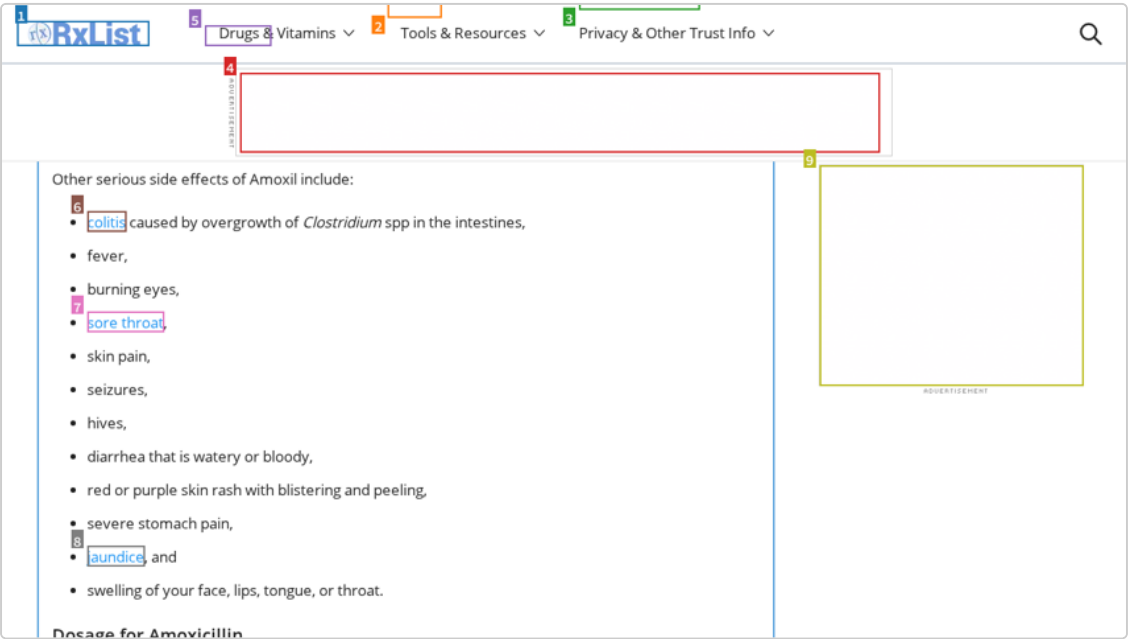

Response:

```
```json
{
  "name": "scroll",
  "arguments": {
    "direction": "down",
    "reasoning": "The dosage information for Amoxicillin is likely below the current visible section, as the visible content focuses on side effects. Scrolling down will help reveal more content, potentially including dosage details."
  }
}
```

### Screenshots:

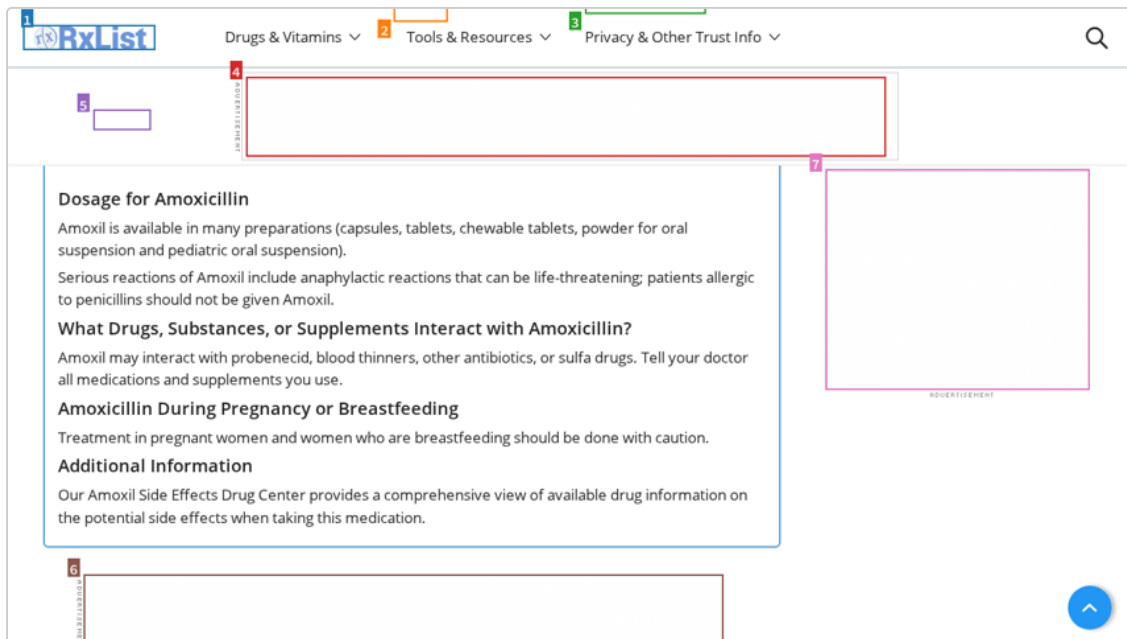

**Response:**

```
```json
{
  "name": "click",
  "arguments": {
    "element_id": "5",
    "description": "search input field",
    "reasoning": "I need to search for Amoxicillin dosage information"
  }
}
```
```

**Step 5 (2025-10-07T15:00:18.467695)**

## Screenshots:



## Response:

```
```json
{
  "name": "click",
  "arguments": {
    "element_id": "4",
    "description": "Dosage for Amoxicillin section",
    "reasoning": "I need to click on the section that contains the dosage information for Amoxicillin to gather the required details."
  }
}
```
```

Step 6 (2025-10-07T15:00:32.456970)

## Screenshots:

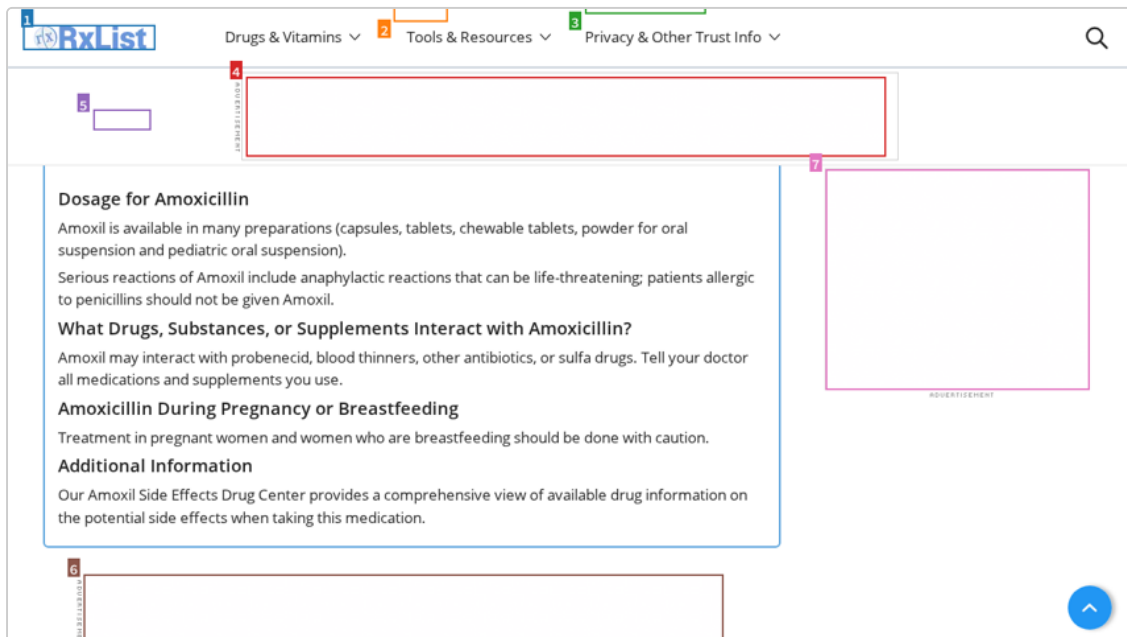

## Response:

Thought: The current page already contains the dosage information for Amoxicillin. It mentions that Amoxicillin is available in various forms such as capsules, tablets, chewable tablets, powder for oral suspension, and pediatric oral suspension. Since the information is visible, I can directly provide the answer.

Action:

```
```json
```

```
{
  "name": "stop",
  "arguments": {
    "answer": "Amoxicillin is available in many preparations including capsules, tablets, chewable tablets, powder for oral suspension, and pediatric oral suspension.",
    "reasoning": "The dosage information for Amoxicillin is clearly stated in the visible content on the page."
  }
}
```

```
}  
...
```
