# Supplementary material
Source: ML conference proceedings conference paper supplement (https://openreview.net/forum?id=cvAZKWA1HZ)
Supplement: supplementary_material [file health_tasks_health_V71_1228.pdf › supplementary_materials/trajectory_evaluation/health_tasks_health_V71_1228.pdf]

# Task Report

**Session ID:** health\_tasks\_health\_V71\_1228

**Task Description:** List three potential interactions between a medicine and another substance found in the 'Medicines A to Z' section

**Total Rounds:** 9

## Step 1 (2025-10-07T16:39:40.725314)

### Screenshots:

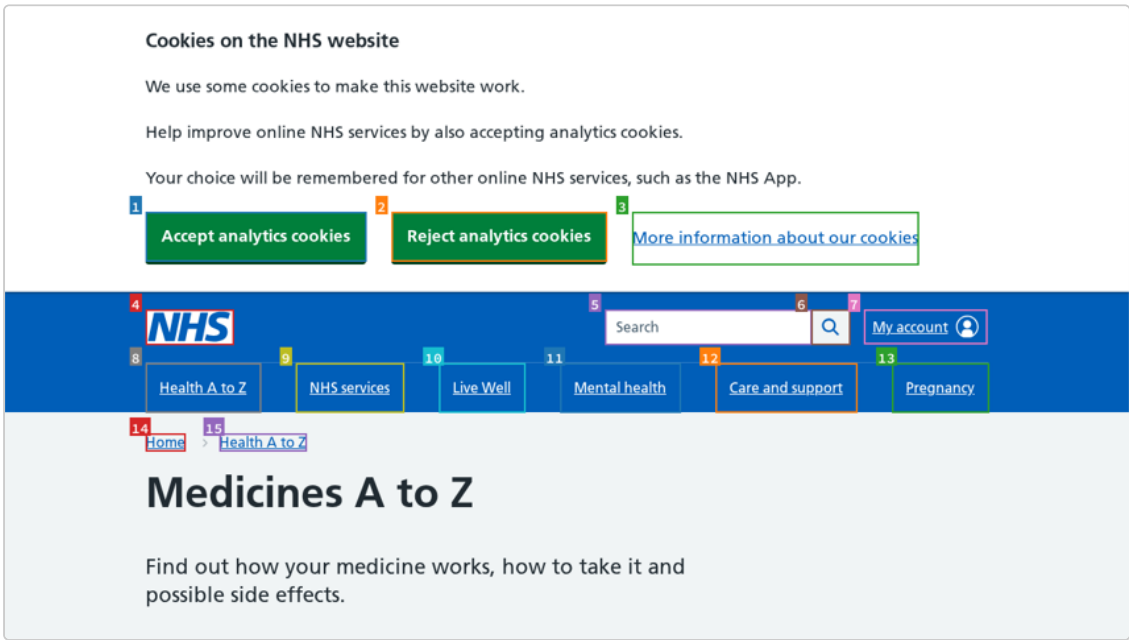

### Response:

To find information about potential interactions between a medicine and another substance, I need to search for a specific medicine in the

'Medicines A to Z' section. Since the search box is available, I will start by typing a common medicine name into the search field.

Action:

```
```json
{
  "name": "type",
  "arguments": {
    "text": "paracetamol",
    "element_id": "6",
    "field_description": "search input field",
    "reasoning": "I need to search for information about paracetamol to find potential interactions"
  }
}
```
```

## Step 2 (2025-10-07T16:39:54.493303)

### Screenshots:

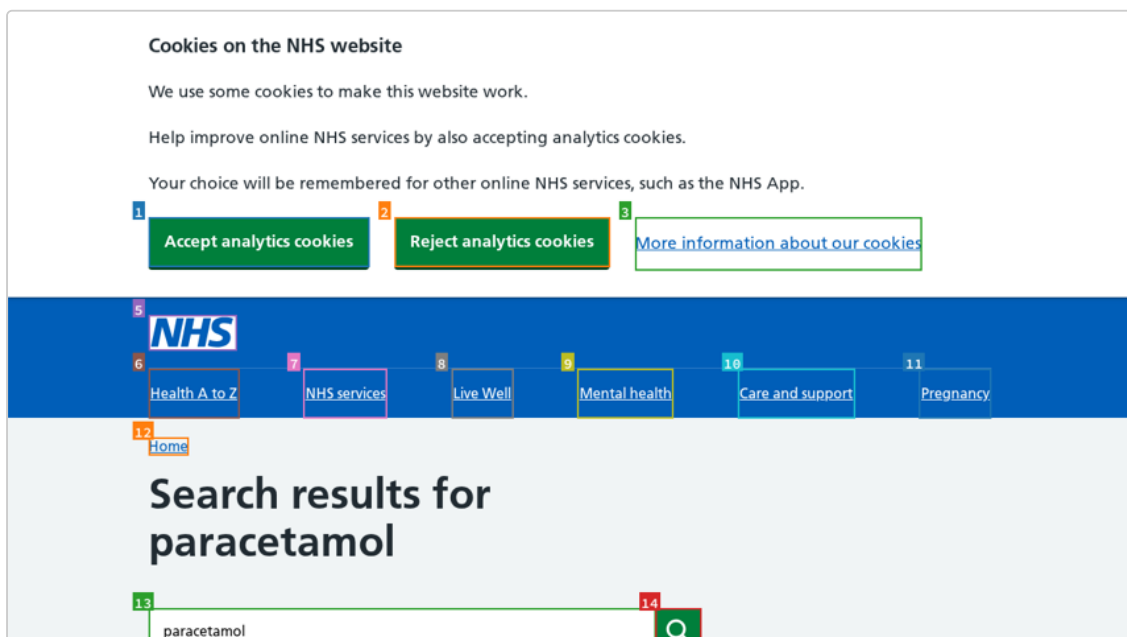

## Response:

To find information about interactions between a medicine and other substances, I need to navigate to the 'Medicines A to Z' section. The current page shows search results for 'paracetamol,' but I need to explore the 'Health A to Z' section, which likely includes the 'Medicines A to Z' subsection.

### ### Reasoning:

1. The 'Health A to Z' link (element 7) is likely to lead to a page where I can find the 'Medicines A to Z' section.
2. Once in the 'Medicines A to Z' section, I can search for specific medicines and find information about their interactions.

### ### Action:

I will click on the 'Health A to Z' link to navigate to the relevant section.

```
```json
{
  "name": "click",
  "arguments": {
    "element_id": "7",
    "description": "Health A to Z link",
    "reasoning": "Clicking this link will likely lead to the 'Medicines A to Z' section where I can find information about medicine interactions."
  }
}
```
```

**Step 3** (2025-10-07T16:40:08.835036)

## Screenshots:

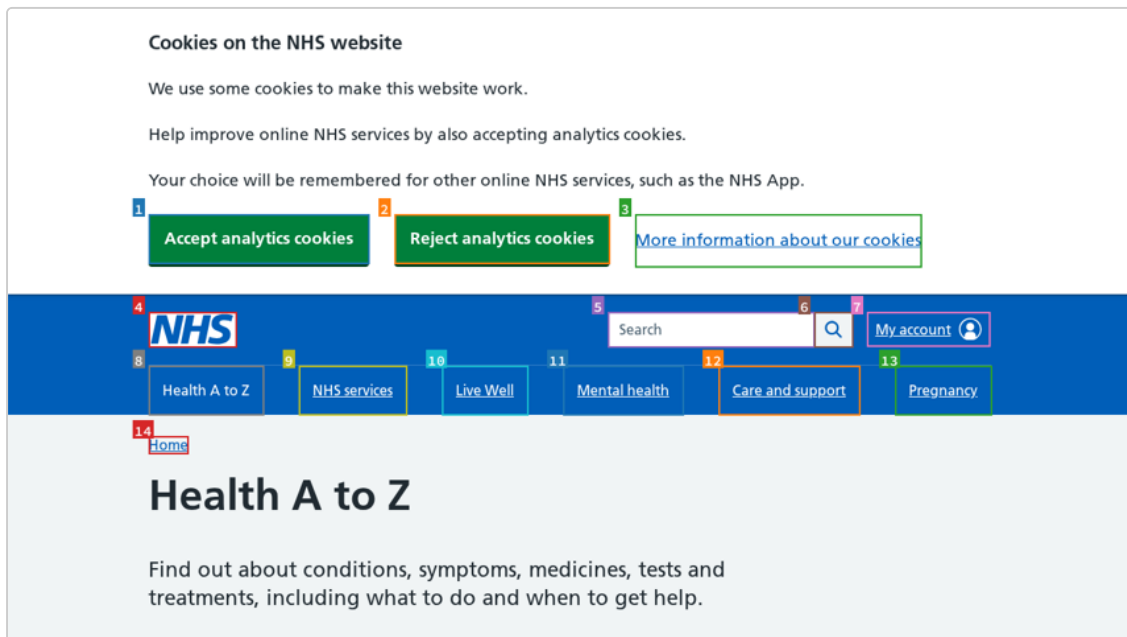

## Response:

To find information about potential interactions between a medicine and another substance, I need to navigate to the 'Medicines A to Z' section. Since the current page is the 'Health A to Z' section, I should use the search bar to look for 'Medicines A to Z'.

**\*\*Action:\*\***

```json

```
{
  "name": "type",
  "arguments": {
    "text": "Medicines A to Z",
    "element_id": "6",
    "field_description": "search input field",
    "reasoning": "I need to search for the 'Medicines A to Z' section to find information about medicine interactions."
  }
}
```

```
}  
...
```

## Step 4 (2025-10-07T16:40:23.427112)

### Screenshots:

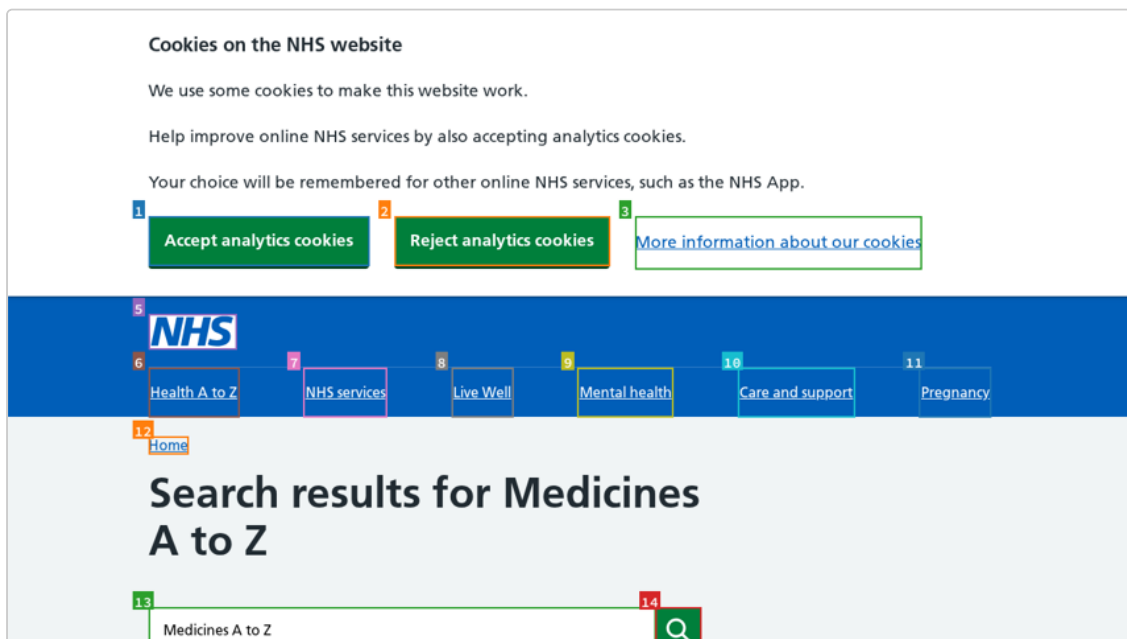

### Response:

To find information about potential interactions between medicines and other substances, I need to search for a specific medicine or keyword related to interactions. Since the search bar is not fully visible, I will first scroll down to make it accessible.

**\*\*Action:\*\***

```json

{

"name": "scroll",

"arguments": {

"direction": "down",

"reasoning": "To access the search bar and find information about medicine interactions."

}  
}  
...

## Step 5 (2025-10-07T16:40:32.605596)

### Screenshots:

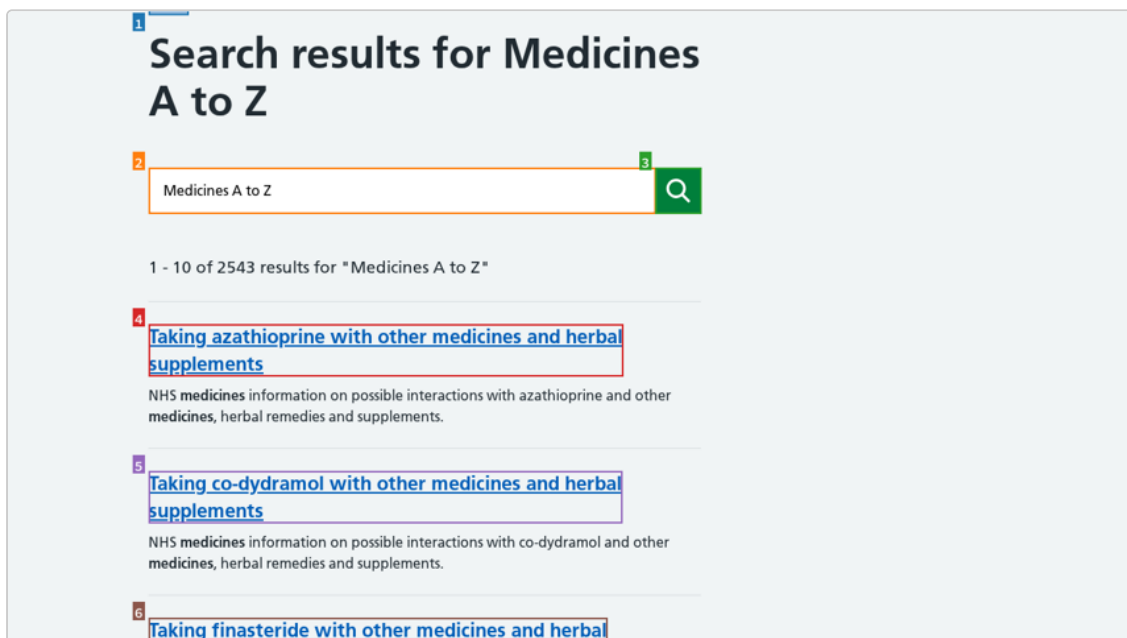

### Response:

To find three potential interactions between a medicine and another substance, I should click on one of the search results to view the detailed information. Since the first result is about "Taking azathioprine with other medicines and herbal supplements," I will click on it to explore the interactions.

Action:

```json

```
{
  "name": "click",
  "arguments": {
    "element_id": "4",
    "description": "Taking azathioprine with other medicines and herbal
supplements",
    "reasoning": "Clicking on this result will provide details about
interactions involving azathioprine."
  }
}
...
```

## Step 6 (2025-10-07T16:40:44.830759)

### Screenshots:

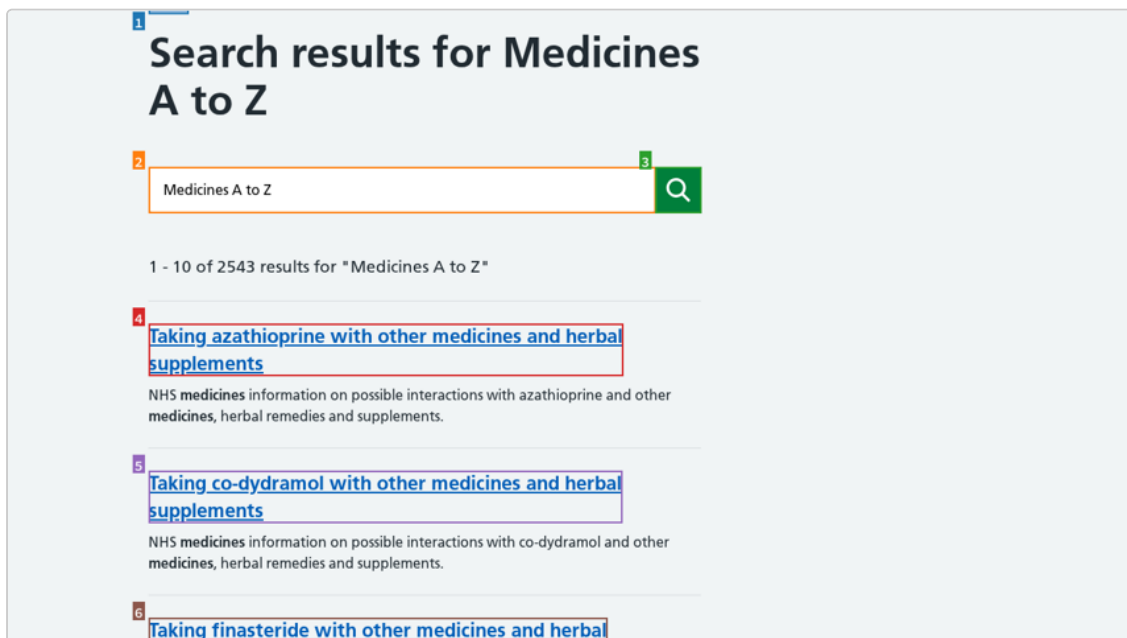

### Response:

To find three potential interactions between a medicine and another substance, I will click on the first search result link to explore the detailed

information provided.

Action:

```
```json
{
  "name": "click",
  "arguments": {
    "element_id": "4",
    "description": "Taking azathioprine with other medicines and herbal supplements",
    "reasoning": "Clicking on the first result will provide detailed information about interactions involving azathioprine."
  }
}
```
```

**Step 7** (2025-10-07T16:40:56.512797)

## Screenshots:

The screenshot displays the NHS website search results for the query "Medicines A to Z". The page title is "Search results for Medicines A to Z". Below the title is a search bar containing the text "Medicines A to Z" and a green search button. The results section shows "1 - 10 of 2543 results for 'Medicines A to Z'". The first three results are highlighted with numbered boxes (4, 5, and 6) and red borders. Result 4 is titled "Taking azathioprine with other medicines and herbal supplements" and includes the text "NHS medicines information on possible interactions with azathioprine and other medicines, herbal remedies and supplements." Result 5 is titled "Taking co-dydramol with other medicines and herbal supplements" and includes the text "NHS medicines information on possible interactions with co-dydramol and other medicines, herbal remedies and supplements." Result 6 is titled "Taking finasteride with other medicines and herbal supplements".

1 Search results for Medicines A to Z

2 Medicines A to Z 3

1 - 10 of 2543 results for "Medicines A to Z"

4 [Taking azathioprine with other medicines and herbal supplements](#)  
NHS medicines information on possible interactions with azathioprine and other medicines, herbal remedies and supplements.

5 [Taking co-dydramol with other medicines and herbal supplements](#)  
NHS medicines information on possible interactions with co-dydramol and other medicines, herbal remedies and supplements.

6 [Taking finasteride with other medicines and herbal supplements](#)



## Response:

To achieve the goal of listing three potential interactions between a medicine and another substance, I will click on the first search result link to gather detailed information.

**\*\*Reasoning:\*\*** The first search result titled "Taking azathioprine with other medicines and herbal supplements" seems relevant to the task. By clicking on this link, I can access the detailed information about the interactions involving azathioprine.

```
```json
{
  "name": "click",
  "arguments": {
    "element_id": "4",
    "description": "Taking azathioprine with other medicines and herbal supplements",
    "reasoning": "Clicking this link will provide detailed information about interactions involving azathioprine."
  }
}
```
```

**Step 8 (2025-10-07T16:41:10.594914)**

## Screenshots:

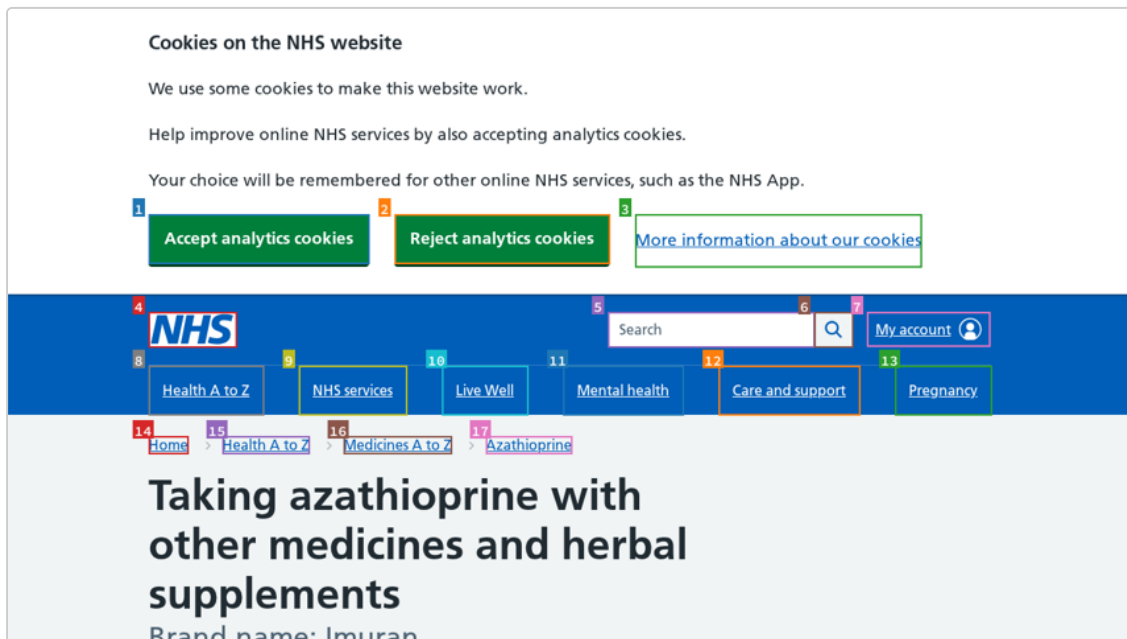

## Response:

To find three potential interactions between a medicine and another substance, I need to explore the content of the page further. Since the page is about azathioprine, I will scroll down to find specific information about interactions.

**\*\*Action:\*\***

```json

{

"name": "scroll",

"arguments": {

"direction": "down",

"reasoning": "I need to scroll down to find detailed information about interactions between azathioprine and other substances."

}

}

```

## Screenshots:

**Taking azathioprine with other medicines and herbal supplements**  
Brand name: Imuran

**Cautions with other medicines**

Azathioprine can affect the way some medicines work. Other medicines can also affect the way azathioprine works.

Tell your doctor or a pharmacist if you:

- take **allopurinol**, a medicine mainly used for gout
- take ciclosporin or tacrolimus, immunosuppressant medicines
- take **warfarin**, used to prevent blood clots
- are having **chemotherapy**, used to treat cancer
- are going to have any type of surgery – tell your doctor or anaesthetist that you take azathioprine beforehand
- have recently had or are due to have any **vaccinations**, especially a

## Response:

Thought: The page already provides a list of potential interactions between azathioprine and other substances. I can directly extract this information to answer the question.

Action:

```
```json
```

```
{  
  "name": "stop",  
  "arguments": {  
    "answer": "Three potential interactions between azathioprine and other substances are: 1) Allopurinol (used for gout), 2) Warfarin (used to prevent blood clots), and 3) Chemotherapy (used to treat cancer).",  
    "reasoning": "The page explicitly lists these interactions, and no further actions are needed to find the answer."  
  }  
}
```

```
}  
...
```
