# Supplementary material
Source: ML conference proceedings conference paper supplement (https://openreview.net/forum?id=cvAZKWA1HZ)
Supplement: supplementary_material [file health_tasks_health_V71_3274.pdf › supplementary_materials/trajectory_evaluation/health_tasks_health_V71_3274.pdf]

# Task Report

**Session ID:** health\_tasks\_health\_V71\_3274

**Task Description:** Find a hospital in California

**Total Rounds:** 10

## Step 1 (2025-10-07T17:28:17.043067)

### Screenshots:

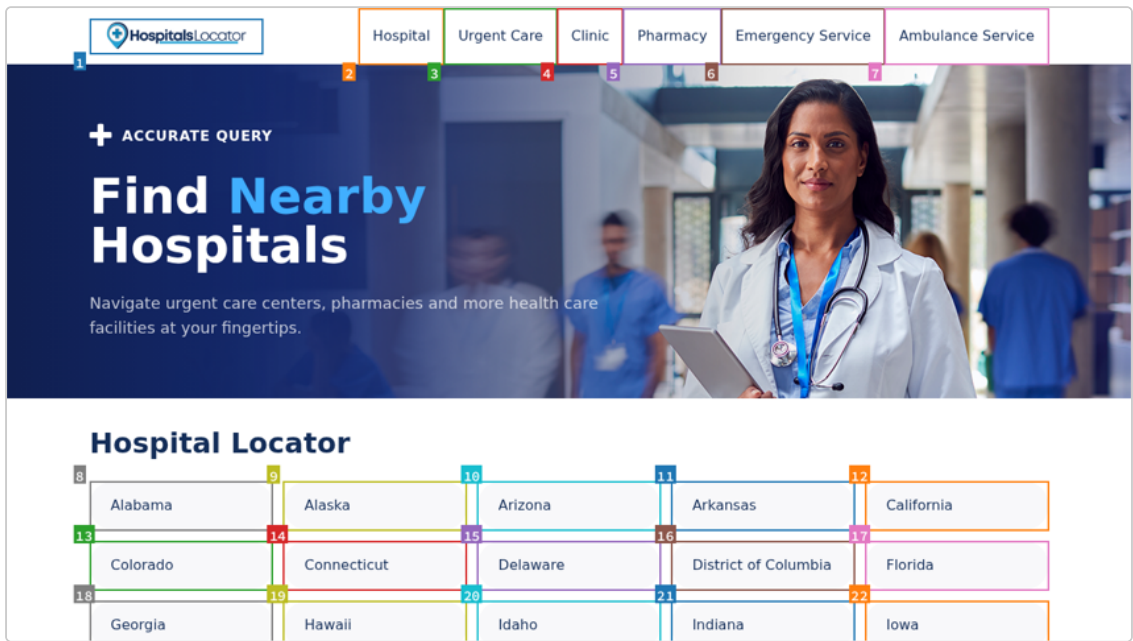

### Response:

```
```json
{
  "name": "click",
```

```

"arguments": {
  "element_id": "12",
  "description": "California state in the grid",
  "reasoning": "To find a hospital in California, I need to select the state
from the grid."
}
}
...

```

## Step 2 (2025-10-07T17:28:30.730248)

### Screenshots:

The screenshot displays the HospitalsLocator website interface. At the top, there are navigation tabs for Hospital, Urgent Care, Clinic, Pharmacy, Emergency Service, and Ambulance Service. Below these, a breadcrumb trail shows the path: HospitalsLocator / Find Care / Hospital / California. The main heading is "Find Hospitals & Medical Centers in California", followed by a subheading "Find emergency medical services and medical transport services in California to access details on pre-hospital fibrinolytic therapy and transfers between facilities." and a "Get Started" button. A section titled "Choose Your City" presents a grid of city selection buttons, each with a location count (e.g., Alameda: 1 Locations, Alhambra: 1 Locations, Anaheim: 4 Locations). To the right, a "Health Care Services" table lists the number of locations for each service type. At the bottom right, there is a section for "Explore Health Topics" with a link to an "Urgent Care Guide: Preparing For Optimal Treatment Handy Guide".

| Service           | Count  |
|-------------------|--------|
| Hospital          | 6,258  |
| Urgent Care       | 32,129 |
| Clinic            | 32,129 |
| Pharmacy          | 46,636 |
| Emergency Service | 1,476  |
| Ambulance Service | 7,213  |

### Response:

To find a hospital in California, I should start by clicking on the "Get Started" button to proceed with the search process. This will likely lead to more specific options or filters for finding hospitals.

**\*\* Action:\*\***

```
```json
{
  "name": "click",
  "arguments": {
    "element_id": "12",
    "description": "Get Started button",
    "reasoning": "Clicking 'Get Started' will likely initiate the search process for hospitals in California."
  }
}
```
```

### Step 3 (2025-10-07T17:28:39.039793)

#### Screenshots:

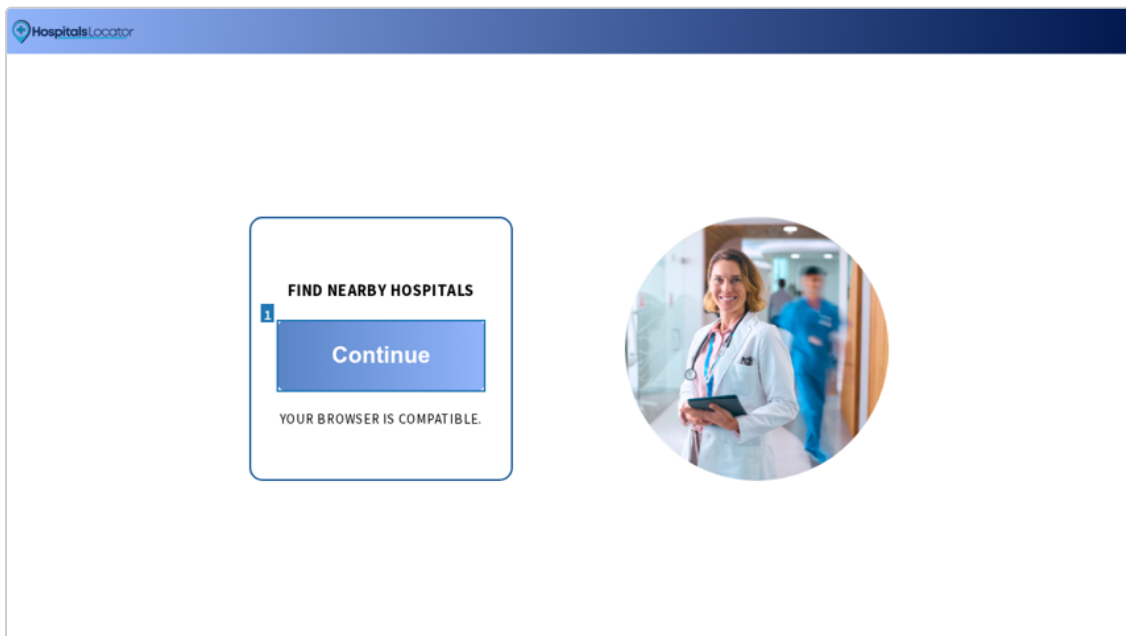

#### Response:

```
```json
{
```

```
"name": "click",
"arguments": {
  "element_id": "1",
  "description": "Continue button",
  "reasoning": "Clicking the 'Continue' button will likely take me to the next
step in finding a hospital in California."
}
}
...
```

#### Step 4 (2025-10-07T17:28:47.709676)

#### Screenshots:

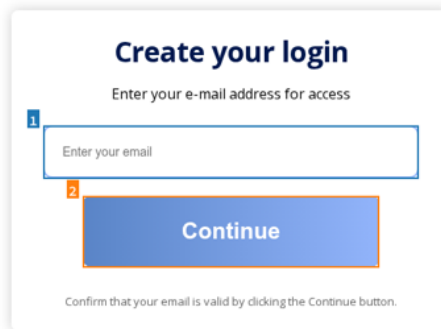

#### Response:

To find a hospital in California, I need to navigate to a search engine or a relevant website. Since the current page is unrelated to the task, I will first go to a search engine.

Action: {"name": "goto\_url", "arguments": {"page\_name": "search engine", "reasoning": "I need to navigate to a search engine to find a hospital in California."}}

## Step 5 (2025-10-07T17:28:54.556993)

### Screenshots:

**Create your login**

Enter your e-mail address for access

1

Enter your email

2

**Continue**

Confirm that your email is valid by clicking the Continue button.

### Response:

To find a hospital in California, I need to navigate to a search engine or a relevant website. Since the current page is for creating a login, I should first exit this page and go to a search engine.

Action:

```json

{

  "name": "goto\_url",

  "arguments": {

    "page\_name": "search engine",

"reasoning": "I need to navigate to a search engine to find a hospital in California"

}

}

``

## Step 6 (2025-10-07T17:29:04.174624)

### Screenshots:

**Create your login**  
Enter your e-mail address for access

1

Enter your email

2

**Continue**

Confirm that your email is valid by clicking the Continue button.

### Response:

To find a hospital in California, I need to navigate to a search engine or a relevant website where I can search for hospitals. The current page is unrelated to the task, so I will first need to go to a search engine.

Action:

``json

{"name": "goto\_url", "arguments": {"page\_name": "search engine",  
"reasoning": "I need to navigate to a search engine to find hospitals in

California"}}

...

Step 7 (2025-10-07T17:29:19.671434)

## Screenshots:

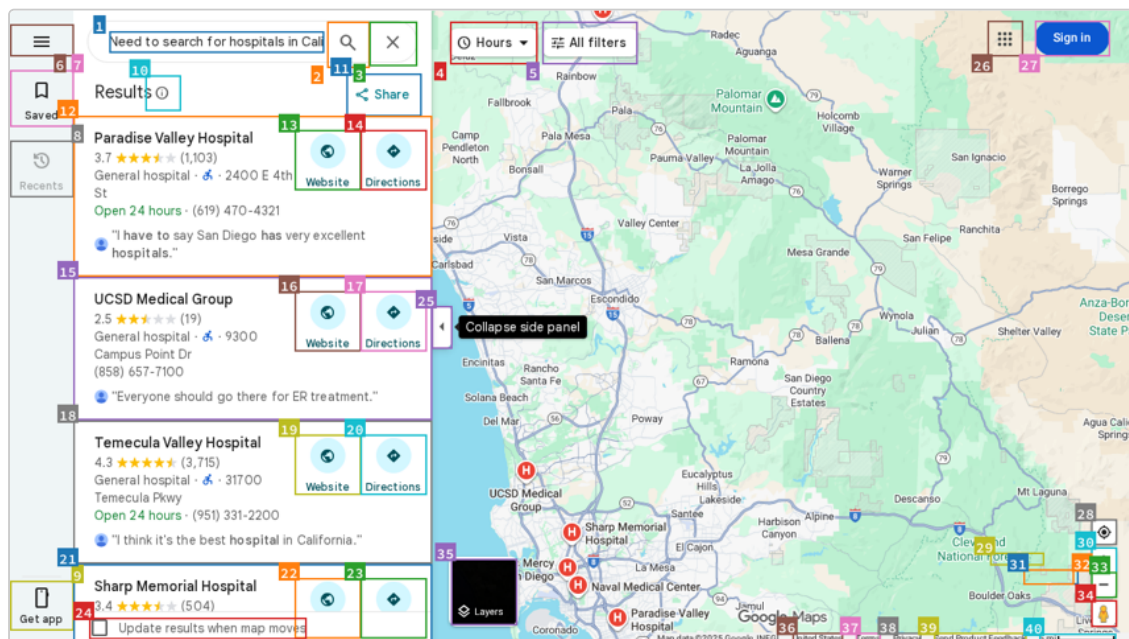

## Response:

To find a hospital in California, I will use the search bar to enter a relevant query. Since the task is to find a hospital, I will type "hospital" into the search bar to see the results.

\*\*Action:\*\*

```json

```
{
  "name": "type",
  "arguments": {
    "text": "hospital",
    "element_id": "10",
```

```
"field_description": "search input field",  
"reasoning": "I need to search for hospitals in California"  
}  
}  
...
```

## Step 8 (2025-10-07T17:29:38.893730)

### Screenshots:

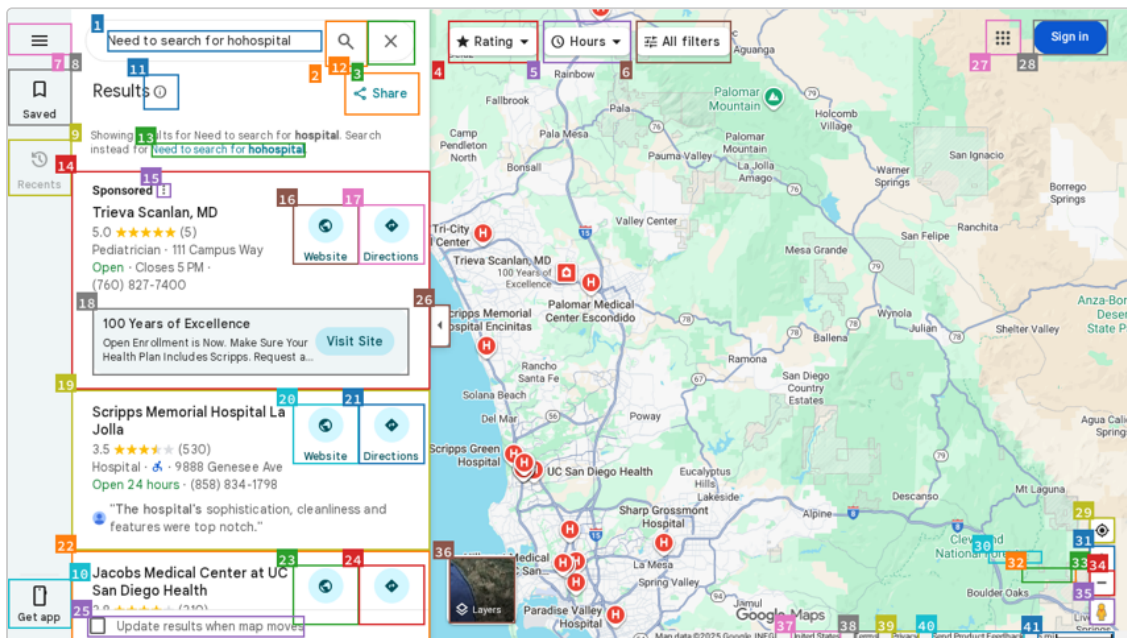

### Response:

To find a hospital in California, I need to correct the search term in the search bar, as it currently contains a typo ("hohospital"). I will type the correct search term "hospital" and initiate the search.

Action:

```
```json
```

```
{
```

```
  "name": "type",
```



```

"arguments": {
  "text": "hospital",
  "element_id": "1",
  "field_description": "search input field",
  "reasoning": "I need to correct the search term to find hospitals in
California"
}
}
...

```

## Step 9 (2025-10-07T17:29:57.998884)

### Screenshots:

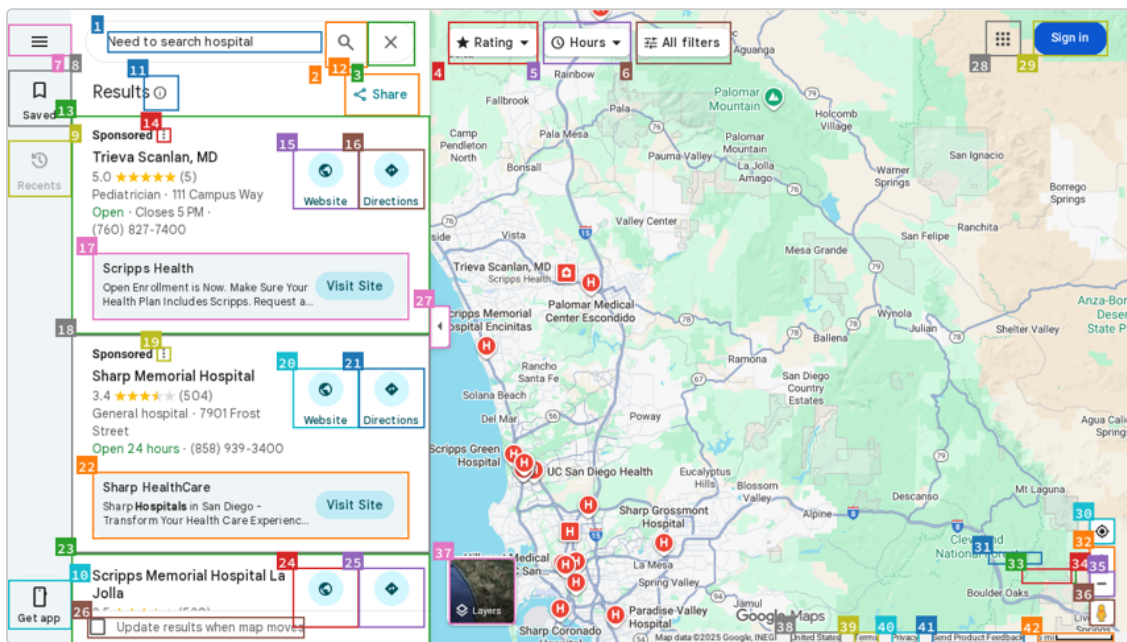

### Response:

To find a hospital in California, I need to ensure the search term is appropriate and that I'm interacting with the correct elements on the page. Since the search bar is already present, I'll type "hospital in California" to refine the search.

**\*\*Action:\*\***

```json

```
{
  "name": "type",
  "arguments": {
    "text": "hospital in California",
    "element_id": "1",
    "field_description": "search input field",
    "reasoning": "I need to search for hospitals in California"
  }
}
```

## Step 10 (2025-10-07T17:30:17.788615)

### Screenshots:

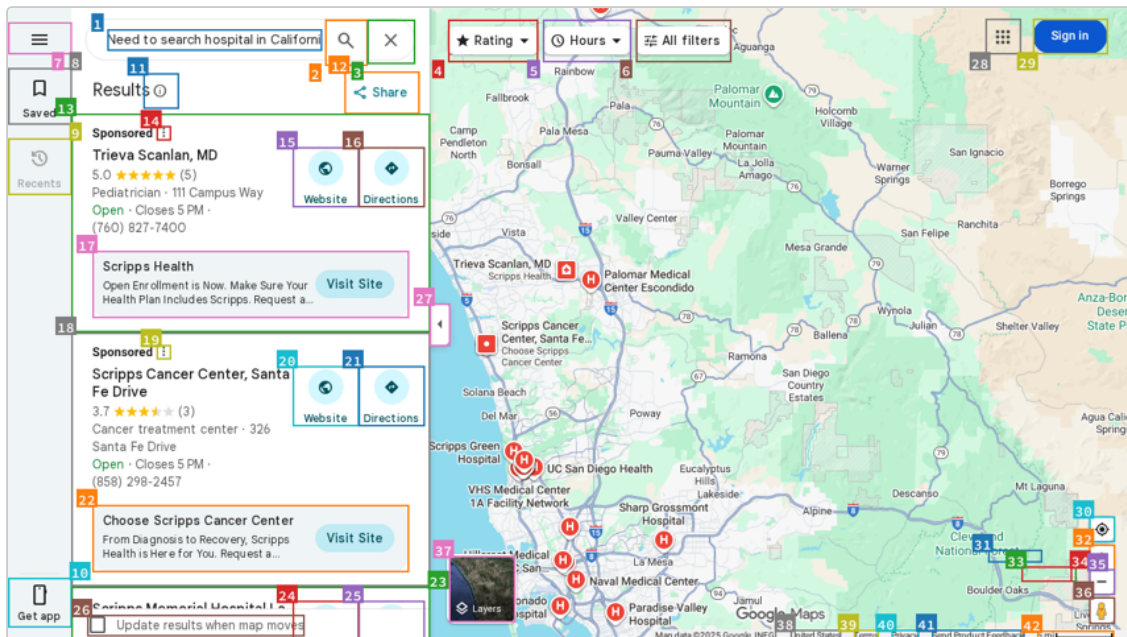

## Response:

```
```json
{
  "name": "stop",
  "arguments": {
    "answer": "The task is completed. The screenshot shows a map of Southern California with multiple hospitals marked, such as Scripps Cancer Center, Scripps Memorial Hospital, and others. These hospitals are clearly listed with their names, ratings, hours, addresses, and contact information. Users can interact with the map or the list to find more details about each hospital.",
    "reasoning": "The task of finding a hospital in California has been successfully completed as the screenshot already displays multiple hospitals with relevant information. No further actions are needed."
  }
}
```
```
