# Supplementary material
Source: ML conference proceedings conference paper supplement (https://openreview.net/forum?id=cvAZKWA1HZ)
Supplement: supplementary_material [file news_tasks_news_V71_1330.pdf › supplementary_materials/trajectory_evaluation/news_tasks_news_V71_1330.pdf]

# Task Report

**Session ID:** news\_tasks\_news\_V71\_1330

**Task Description:** Find the current AQI level for Berlin

**Total Rounds:** 10

**Step 1** (2025-10-09T08:23:52.597589)

## Screenshots:

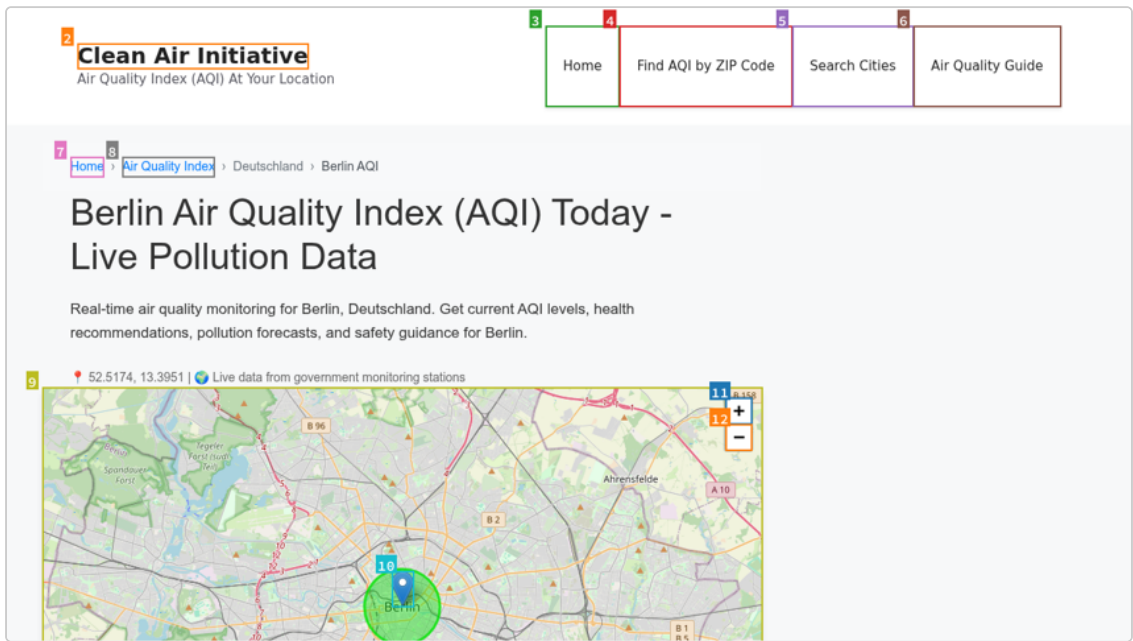

## Response:

To find the current AQI level for Berlin, I need to interact with the map or any other elements that might display the AQI value. The map is likely the primary source for this information, as it shows different AQI levels across

Berlin. I should zoom in to the central area of Berlin, which is highlighted by the green circle, to see if it provides the current AQI level.

**\*\*Action:\*\***

```json

{

"name": "click",

"arguments": {

"element\_id": "10",

"coords": "440 578",

"description": "Green circle highlighting central Berlin on the map",

"reasoning": "Clicking the central area of the map may reveal the current AQI level for Berlin."

}

}

```

## Step 2 (2025-10-09T08:24:07.508054)

### Screenshots:

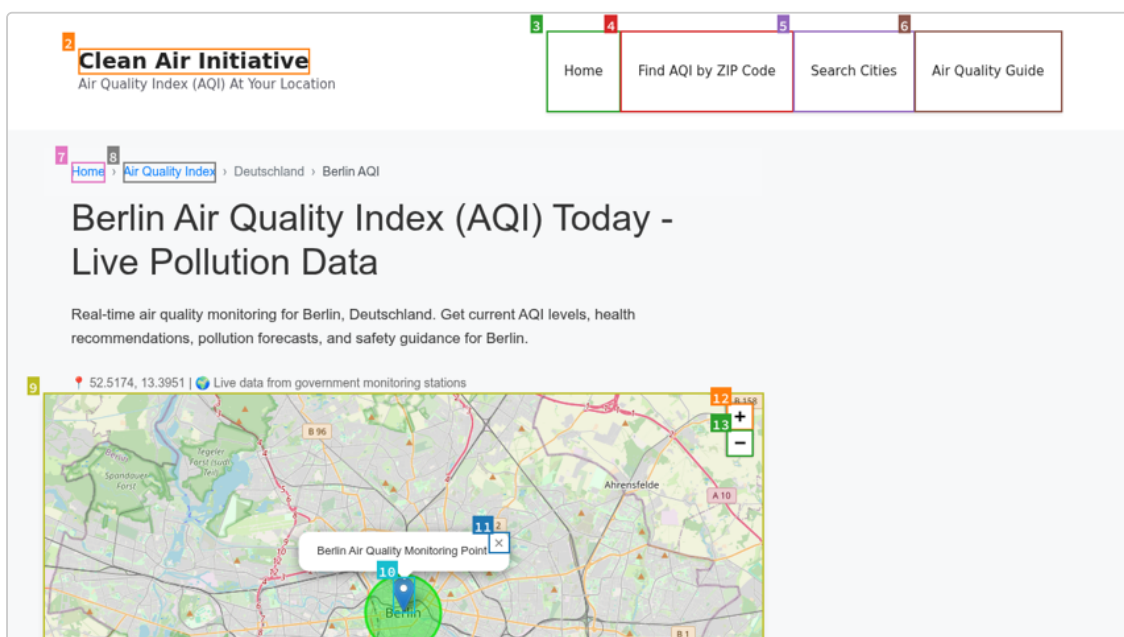

## Response:

To find the current AQI level for Berlin, I need to interact with the map or any other elements that might display the AQI value. The pop-up box near the monitoring point (element 14) seems like a good place to start, as it might contain detailed information about the AQI.

**\*\*Action:\*\***

```json

{

"name": "click",

"arguments": {

"element\_id": "14",

"description": "pop-up box for Berlin Air Quality Monitoring Point",

"reasoning": "Clicking on the pop-up box may reveal the current AQI level for Berlin."

}

}

```

**Step 3 (2025-10-09T08:24:18.209130)**

## Screenshots:

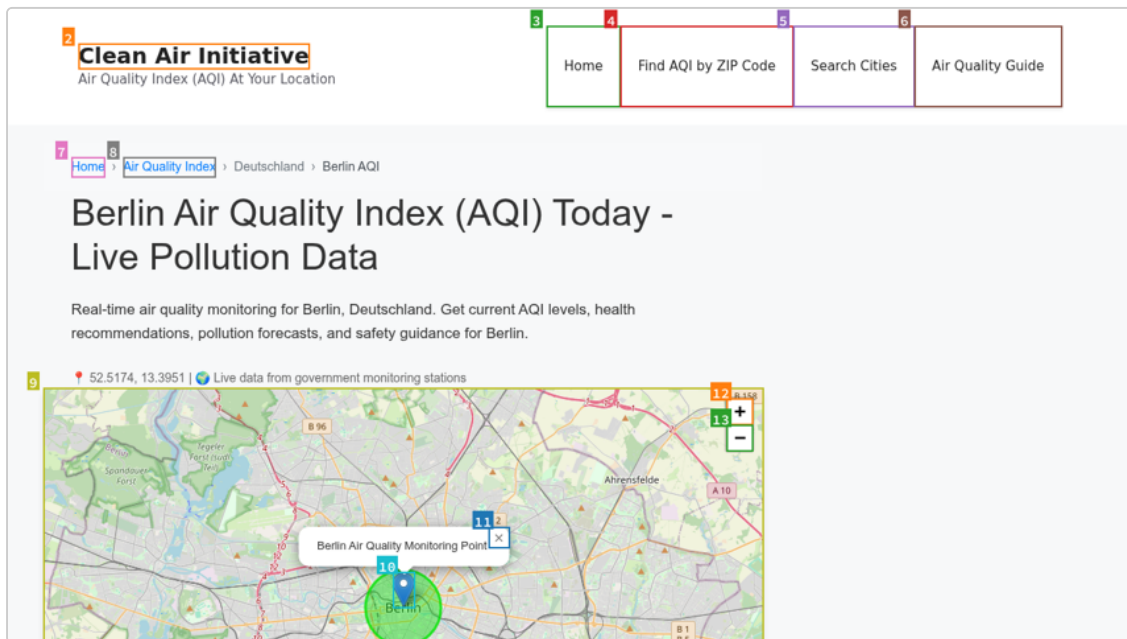

## Response:

```
```json
{
  "name": "click",
  "arguments": {
    "element_id": "10",
    "description": "Monitoring Point Information Pop-up",
    "reasoning": "Clicking on the highlighted monitoring point will provide detailed AQI information for Berlin."
  }
}
```
```

**Step 4** (2025-10-09T08:24:31.628213)

## Screenshots:



## Response:

To find the current AQI level for Berlin, I need to interact with the map or any other elements that might display the AQI value. The map has monitoring points, and one of them is highlighted with a green circle. Hovering over or clicking this point might reveal the AQI level.

**\*\*Reasoning:\*\*** The highlighted monitoring point on the map is likely to provide the current AQI level for Berlin. Interacting with this point should give me the necessary information.

**\*\*Action:\*\*** Click on the highlighted monitoring point on the map to view the current AQI level for Berlin.

```
``json
{
  "name": "click",
  "arguments": {
    "element_id": "10",
```

```
"coords": "450 660",  
  "description": "10 Berlin Air Quality Monitoring Point",  
  "reasoning": "Clicking on the highlighted monitoring point should display  
the current AQI level for Berlin."  
}  
}  
...
```

## Step 5 (2025-10-09T08:24:41.869453)

### Screenshots:

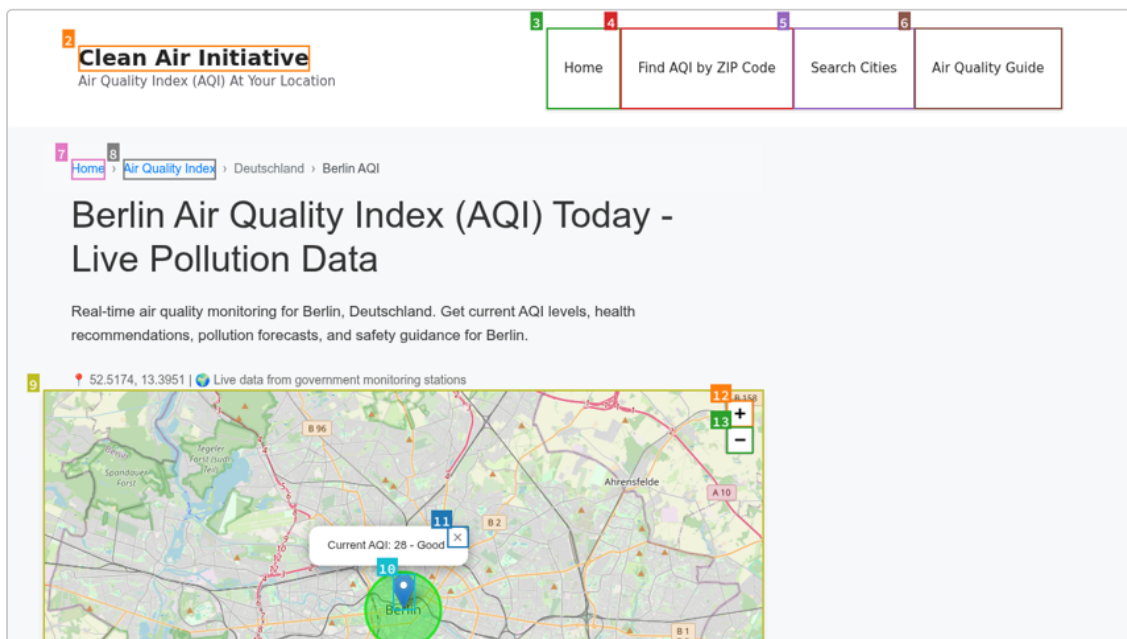

### Response:

```
``json  
{  
  "name": "click",  
  "arguments": {  
    "element_id": "11",  
    "coords": "486 605",
```

```
"description": "Current AQI: 28 - Good",
"reasoning": "I need to click on the current AQI overlay to ensure I have
the correct information about Berlin's AQI level."
}
}
'''
```

## Step 6 (2025-10-09T08:24:51.559910)

### Screenshots:

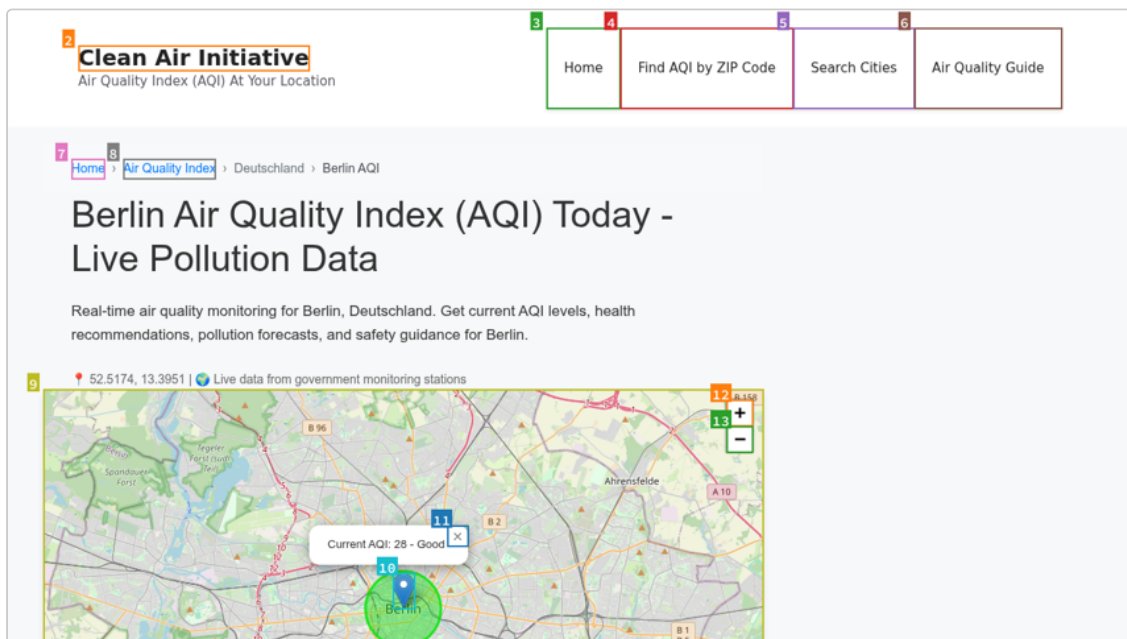

### Response:

```
```json
{
  "name": "click",
  "arguments": {
    "element_id": "11",
    "description": "Current AQI: 28 - Good",
    "reasoning": "I need to interact with the current AQI information to
```

confirm the value and ensure it's the correct data for Berlin."

```
}  
}  
...
```

## Step 7 (2025-10-09T08:25:00.849997)

### Screenshots:

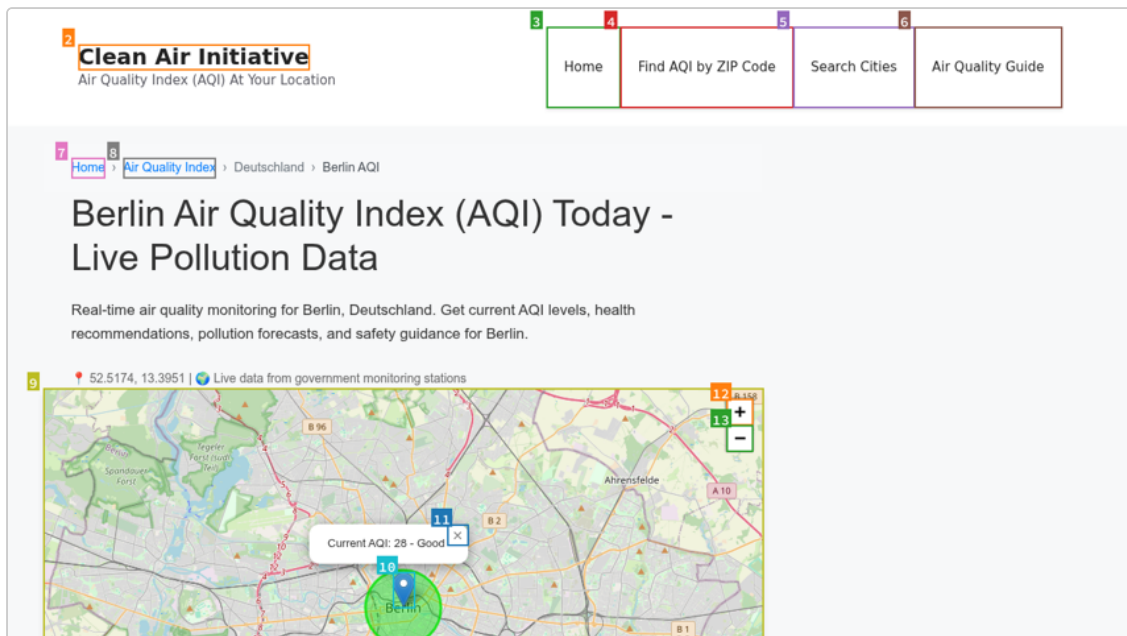

### Response:

```
```json  
{  
  "name": "click",  
  "arguments": {  
    "element_id": "11",  
    "description": "Current AQI: 28 - Good",  
    "reasoning": "I need to interact with the pop-up box displaying the  
current AQI level for Berlin to ensure I have the correct information."  
  }  
}
```



```
}  
...  

```

## Step 8 (2025-10-09T08:25:09.346495)

### Screenshots:

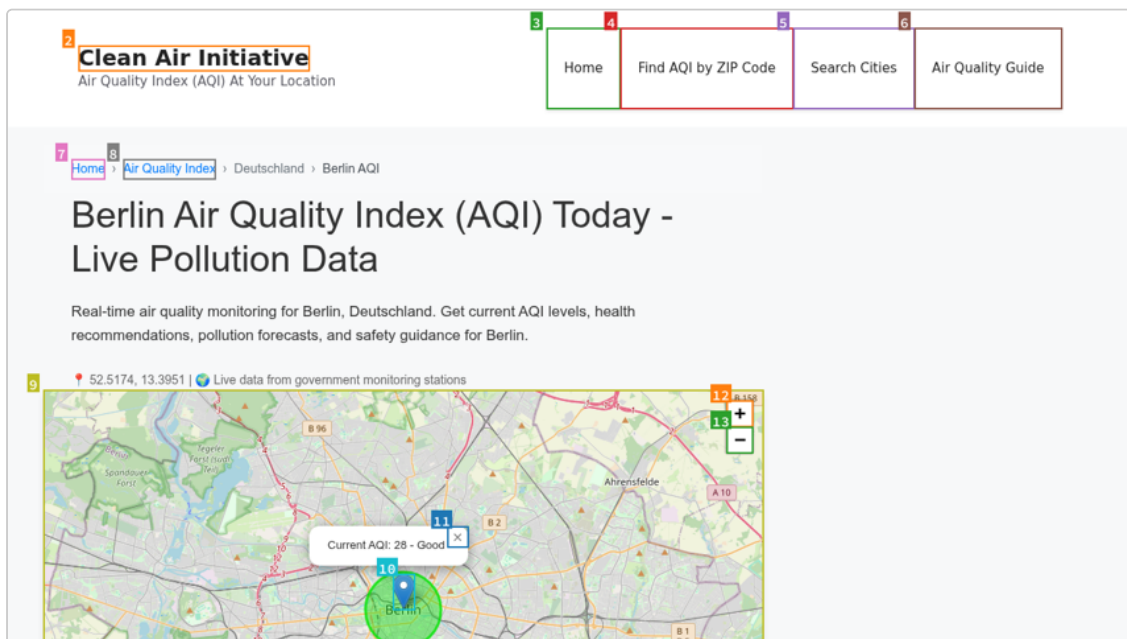

### Response:

```
```json  
{  
  "name": "click",  
  "arguments": {  
    "element_id": "11",  
    "description": "Current AQI: 28 - Good",  
    "reasoning": "I need to interact with the pop-up box showing the current  
AQI level to confirm the information."  
  }  
}
```

```
}  
...  

```

## Step 9 (2025-10-09T08:25:20.897459)

### Screenshots:



### Response:

```
```json  
{  
  "name": "click",  
  "arguments": {  
    "element_id": "11",  
    "description": "Current AQI: 28 - Good",  
    "reasoning": "The current AQI level for Berlin is displayed in a pop-up  
box on the map, which is labeled as 'Current AQI: 28 - Good'. Clicking this  
element will ensure I can confirm the information and proceed to stop the  
task."  
  }  
}
```

```
}  
...  
}
```

## Step 10 (2025-10-09T08:25:31.473853)

### Screenshots:



### Response:

```
```json  
{  
  "name": "stop",  
  "arguments": {  
    "answer": "The current AQI level for Berlin is 28, which is categorized as  
'Good'.",  
    "reasoning": "The current AQI level is clearly displayed in the pop-up  
box on the map, indicating a value of 28 and the category 'Good'."  
  }  
}
```

```
}  
...
```
