# Supplementary material
Source: ML conference proceedings conference paper supplement (https://openreview.net/forum?id=cvAZKWA1HZ)
Supplement: supplementary_material [file services_tasks_services_V1_new_1043.pdf › supplementary_materials/trajectory_evaluation/services_tasks_services_V1_new_1043.pdf]

# Task Report

Session ID: services\_tasks\_services\_V1\_new\_1043

Task Description: Find a job listing for a Solar Consultant in Florida

Total Rounds: 6

## Step 1 (2025-10-09T00:48:45.179989)

### Screenshots:

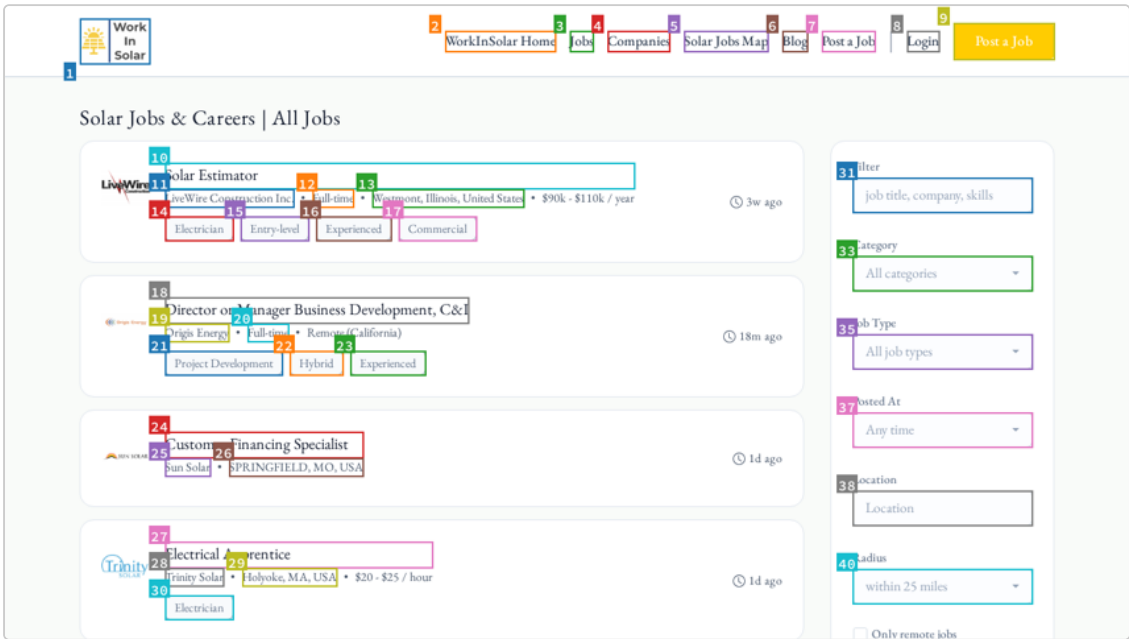

### Response:

```
```json
{
  "name": "type",
```

```

"arguments": {
  "text": "Solar Consultant",
  "element_id": "31",
  "field_description": "filter search input field",
  "reasoning": "I need to search for job listings related to 'Solar Consultant' to find relevant positions."
}
}
...

```

## Step 2 (2025-10-09T00:48:58.999505)

### Screenshots:

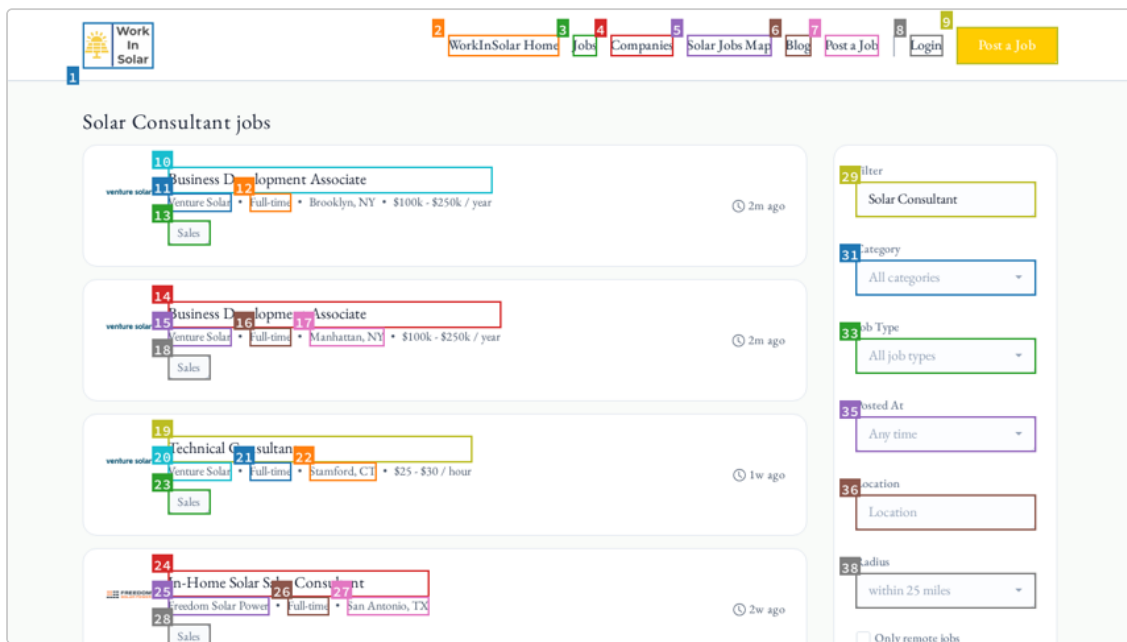

### Response:

To find a job listing for a Solar Consultant in Florida, I need to use the available filters to narrow down the search results. The location filter is the most relevant for this task.

**\*\*Reasoning:\*\*** I will start by entering "Florida" in the location filter to refine the search results to jobs available in Florida.

```
``json
{
  "name": "type",
  "arguments": {
    "text": "Florida",
    "element_id": "36",
    "field_description": "Location input field",
    "reasoning": "I need to filter job listings by location to find jobs in Florida"
  }
}
```

### Step 3 (2025-10-09T00:49:17.822887)

#### Screenshots:

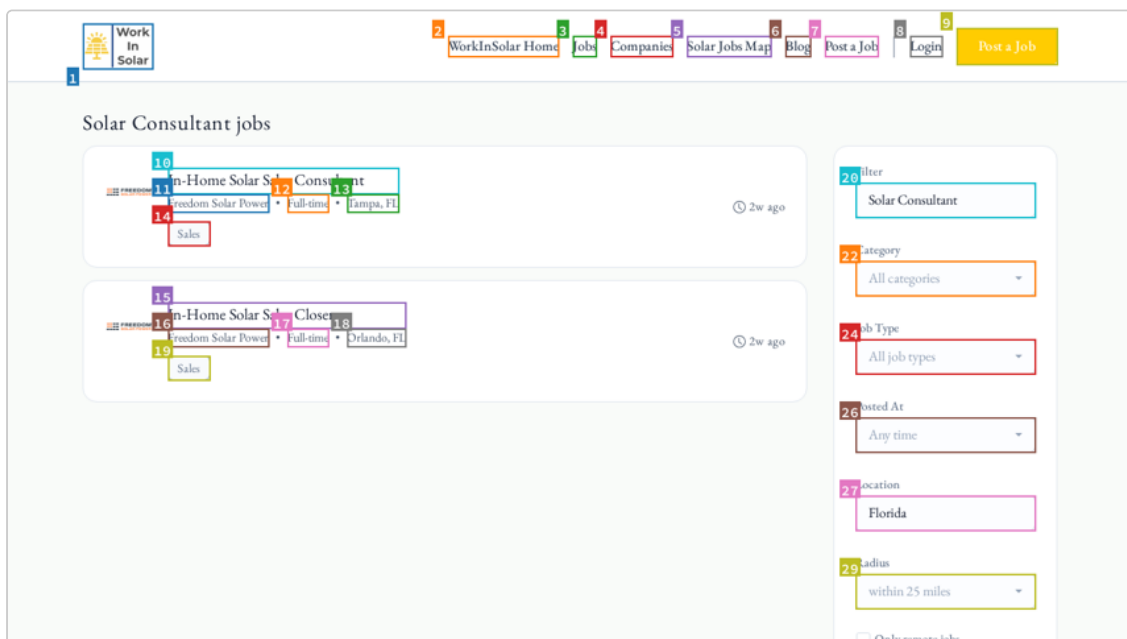

## Response:

To find a job listing for a Solar Consultant in Florida, I need to ensure the location filter is set correctly. The location filter is already set to "Florida," which is appropriate for the task. However, I should verify if the job listings displayed match the criteria. If not, I may need to adjust the filter settings or search term.

### ### Reasoning:

The location filter is already set to "Florida," so I should check if the job listings displayed meet the criteria. If not, I may need to refine the search or adjust the filters.

### ### Action:

I will click on the first job listing to view more details and confirm if it matches the criteria.

```
```json
{
  "name": "click",
  "arguments": {
    "element_id": "10",
    "description": "In-Home Solar System Consultant job listing",
    "reasoning": "Click on the first job listing to view more details and confirm if it matches the criteria for a Solar Consultant in Florida."
  }
}
```
```

**Step 4** (2025-10-09T00:49:26.732935)

## Screenshots:

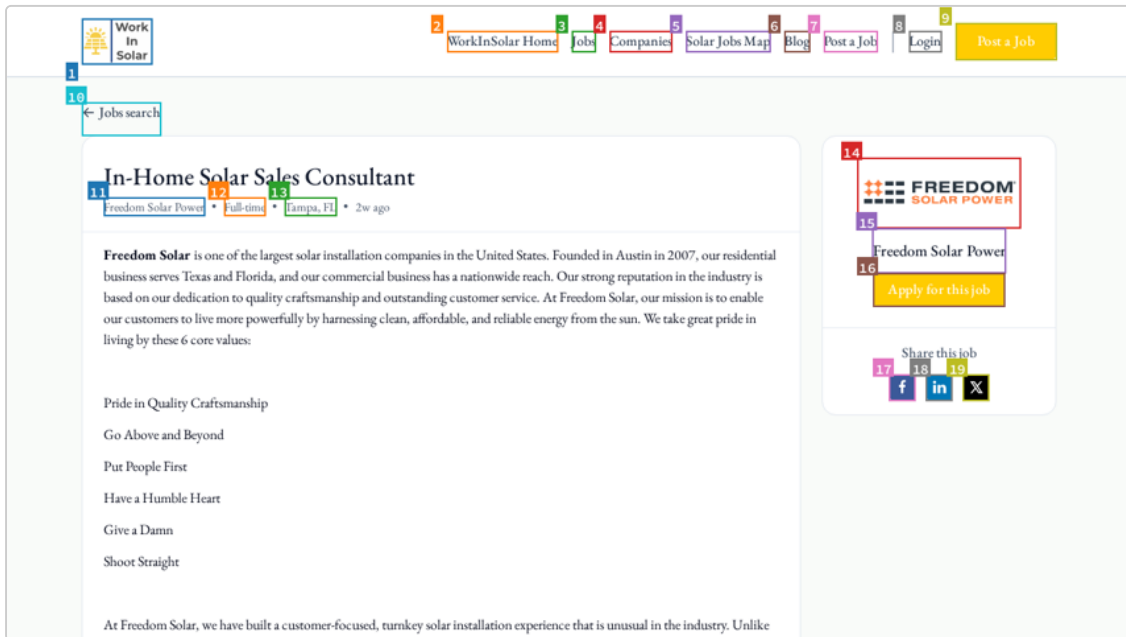

## Response:

```
```json
{
  "name": "click",
  "arguments": {
    "element_id": "10",
    "description": "Jobs search",
    "reasoning": "I need to initiate a search for job listings related to Solar Consultant in Florida."
  }
}
```
```

Step 5 (2025-10-09T00:49:35.431128)

## Screenshots:

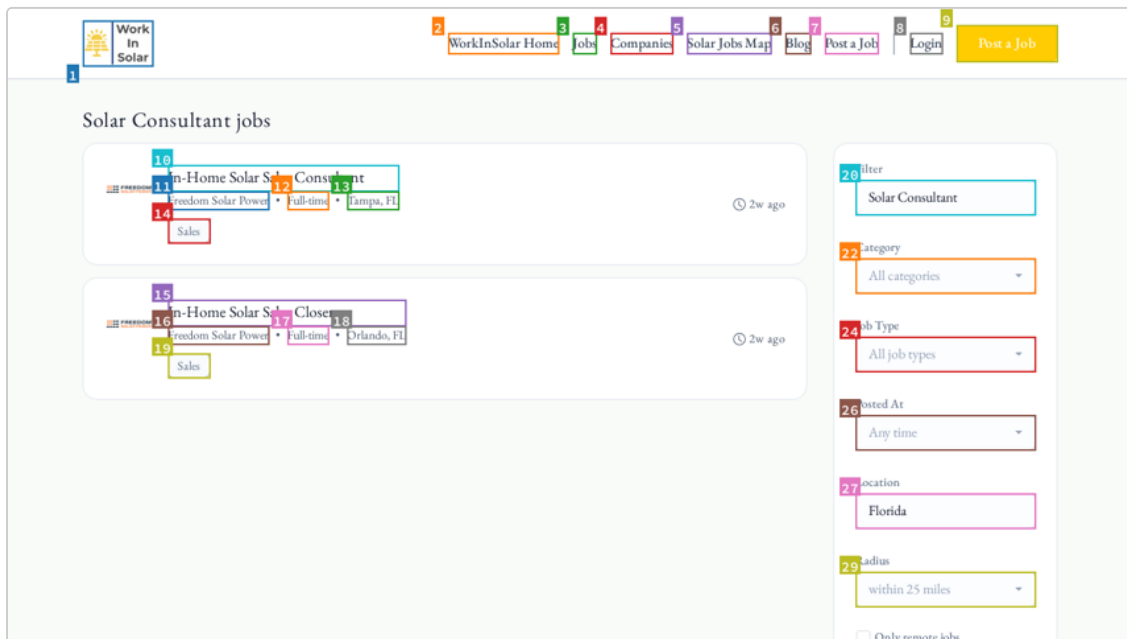

## Response:

```
```json
{
  "name": "click",
  "arguments": {
    "element_id": "27",
    "description": "Location input field",
    "reasoning": "I need to specify the location to filter job listings for Florida."
  }
}
```
```

Step 6 (2025-10-09T00:49:44.598687)

## Screenshots:

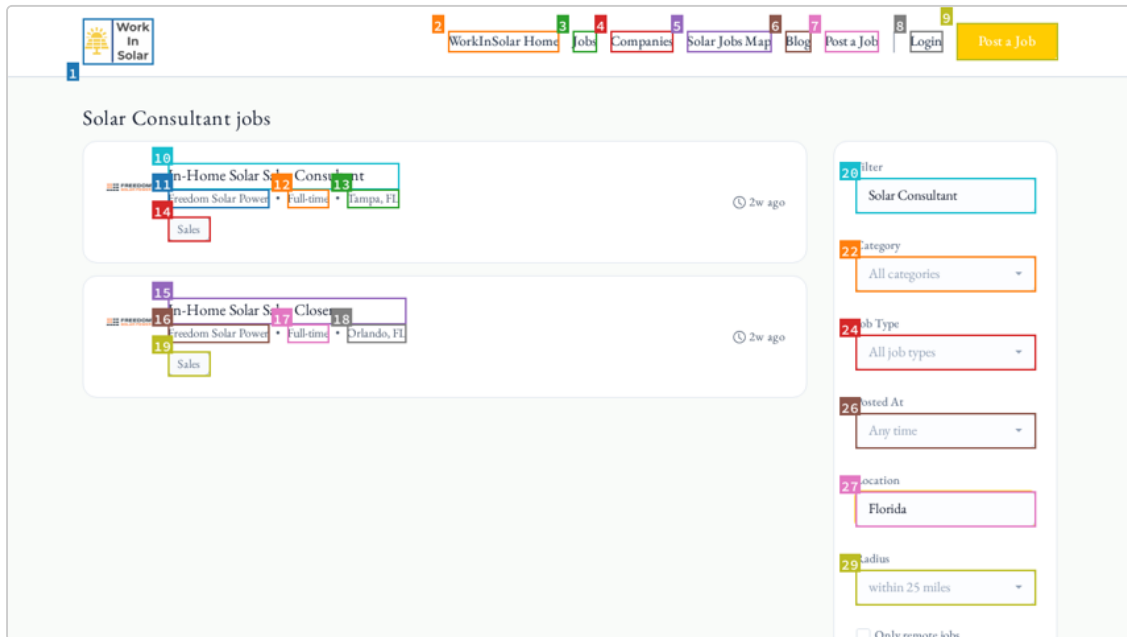

## Response:

Thought: The job listings are already visible, and one of them is for a Solar Consultant position in Tampa, FL. Since the task is to find a job listing for a Solar Consultant in Florida, I can stop here and provide the answer.

Action:

```
```json
```

```
{
  "name": "stop",
  "arguments": {
    "answer": "A job listing for a Solar Consultant in Florida has been found. The position is for 'In-Home Solar System Consultant' at Freedom Solar Power in Tampa, FL.",
    "reasoning": "The job listing matches the criteria of being a Solar Consultant in Florida."
  }
}
```
