# Supplementary material
Source: ML conference proceedings conference paper supplement (https://openreview.net/forum?id=cvAZKWA1HZ)
Supplement: supplementary_material [file services_tasks_services_V71_4422.pdf › supplementary_materials/trajectory_evaluation/services_tasks_services_V71_4422.pdf]

# Task Report

**Session ID:** services\_tasks\_services\_V71\_4422

**Task Description:** Find a pet-friendly restaurant in Denver, CO

**Total Rounds:** 7

## Step 1 (2025-10-08T05:58:25.851961)

### Screenshots:

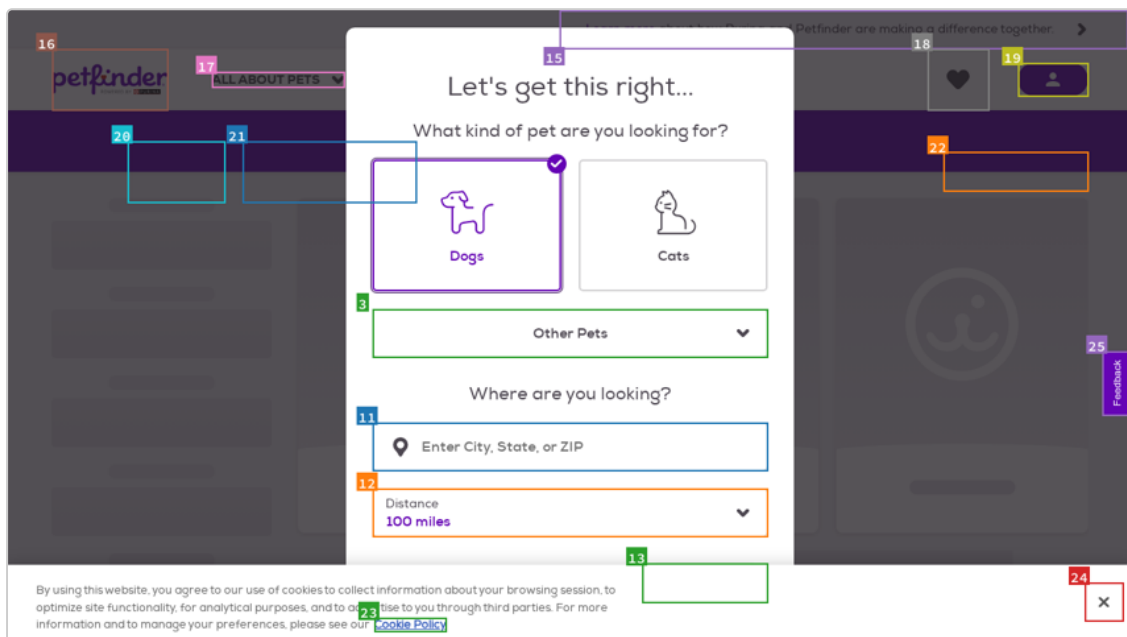

### Response:

To find a pet-friendly restaurant in Denver, CO, I need to navigate away from the current Petfinder search interface, as it is not relevant to the task. I will start by searching for pet-friendly restaurants in Denver, CO.

**\*\*Reasoning:\*\*** The current page is focused on finding pets, not pet-friendly restaurants. I need to perform a search for pet-friendly restaurants in Denver, CO, which requires accessing a search engine or relevant website.

**\*\*Action:\*\*** I will use the `map\_search` function to search for pet-friendly restaurants in Denver, CO.

```
```json
{
  "name": "map_search",
  "arguments": {
    "query": "pet-friendly restaurants in Denver, CO",
    "reasoning": "I need to find pet-friendly restaurants in Denver, CO, so I will use map search to get relevant results."
  }
}
```
```

**Step 2 (2025-10-08T05:58:45.257762)**

## Screenshots:

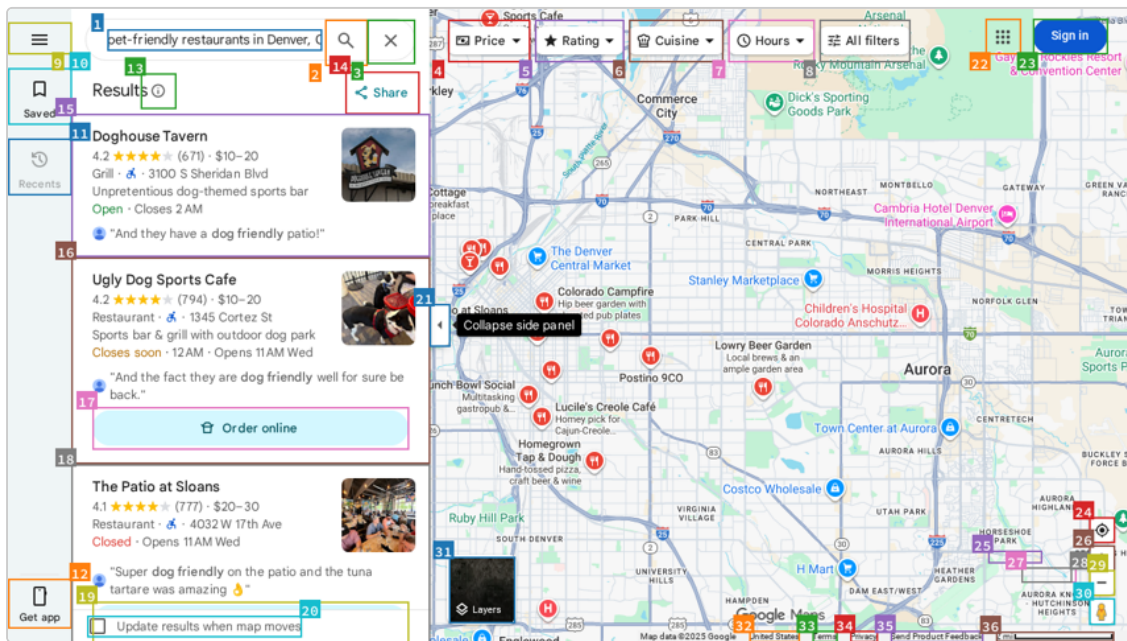

## Response:

To find a pet-friendly restaurant in Denver, CO, I need to interact with the search results or filters to ensure the results are relevant. The current search term "pet-friendly restaurants in Denver, CO" is already entered, and the results are displayed. I should verify if the displayed results meet the criteria and select one.

**\*\*Reasoning:\*\*** The search results are already showing pet-friendly restaurants in Denver. I can directly choose one from the list to complete the task.

**\*\*Action:\*\*** Select a pet-friendly restaurant from the list.

```
``json
{
  "name": "click",
  "arguments": {
    "element_id": "11",
```

```

    "description": "Doghouse Tavern",
    "reasoning": "Selecting a pet-friendly restaurant from the search
results."
  }
}
...

```

### Step 3 (2025-10-08T05:59:06.563681)

#### Screenshots:

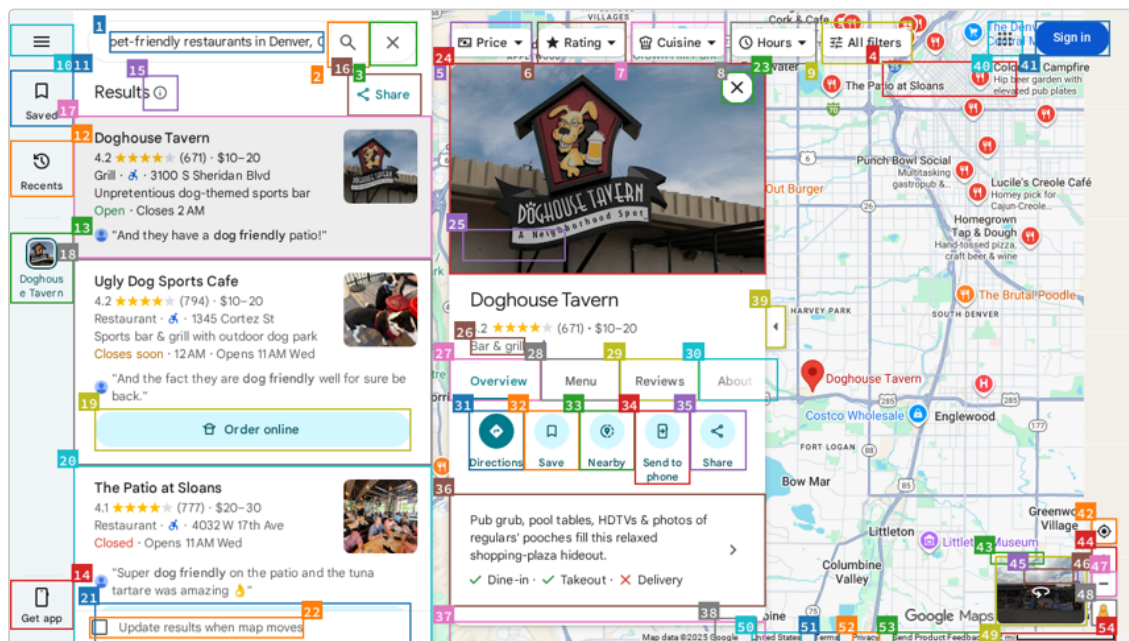

#### Response:

```

``json
{
  "name": "click",
  "arguments": {
    "element_id": "12",
    "description": "Doghouse Tavern listing",
    "reasoning": "I need to select a pet-friendly restaurant from the list.

```

Doghouse Tavern is a suitable option as it is dog-friendly and has a high rating."

}

}

...

#### Step 4 (2025-10-08T05:59:32.620382)

### Screenshots:

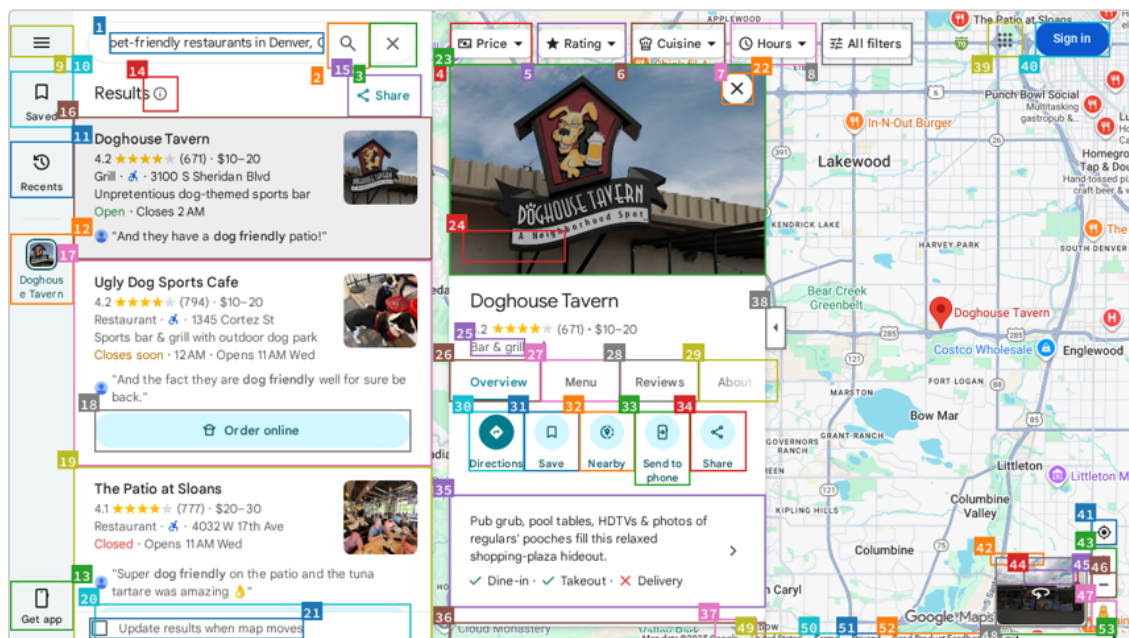

### Response:

```
```json
{
  "name": "click",
  "arguments": {
    "element_id": "11",
    "description": "Doghouse Tavern",
    "reasoning": "Click on the first result, Doghouse Tavern, to view more details about this pet-friendly restaurant."
  }
}
```

```
}  
}  
...
```

## Step 5 (2025-10-08T05:59:54.975862)

### Screenshots:

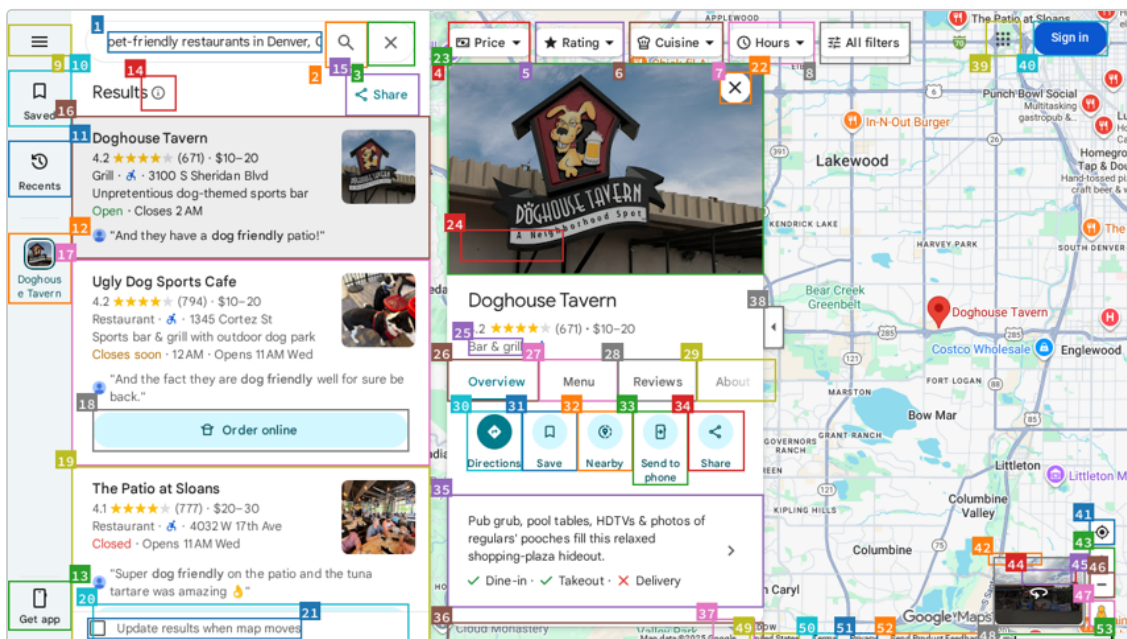

### Response:

```
``json  
{  
  "name": "click",  
  "arguments": {  
    "element_id": "11",  
    "description": "Doghouse Tavern listing",  
    "reasoning": "Click on the Doghouse Tavern listing to view more details  
about this pet-friendly restaurant in Denver."  
  }  
}
```



}  
...

## Step 6 (2025-10-08T06:00:20.495371)

### Screenshots:

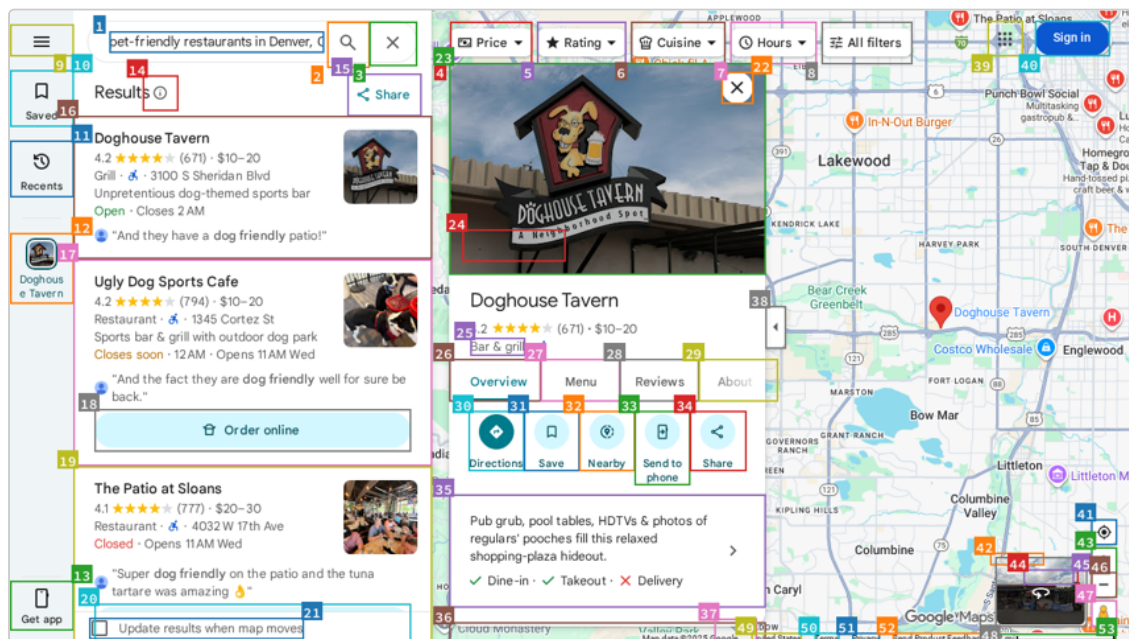

### Response:

To find a pet-friendly restaurant in Denver, CO, I will first ensure that the search term is correctly entered and then review the results displayed. Since the search term "pet-friendly restaurants in Denver" is already entered, I will proceed to analyze the results shown on the page.

#### ### Reasoning:

The search results already display several pet-friendly restaurants in Denver. I need to select one of these options to provide a brief explanation and stop the task.

#### ### Action:

I will click on one of the listed restaurants to gather more details and confirm it as a suitable option.

```
```json
{
  "name": "click",
  "arguments": {
    "element_id": "11",
    "description": "Doghouse Tavern listing",
    "reasoning": "Click on the first pet-friendly restaurant listing to gather more details."
  }
}
```

## Step 7 (2025-10-08T06:00:42.148923)

### Screenshots:

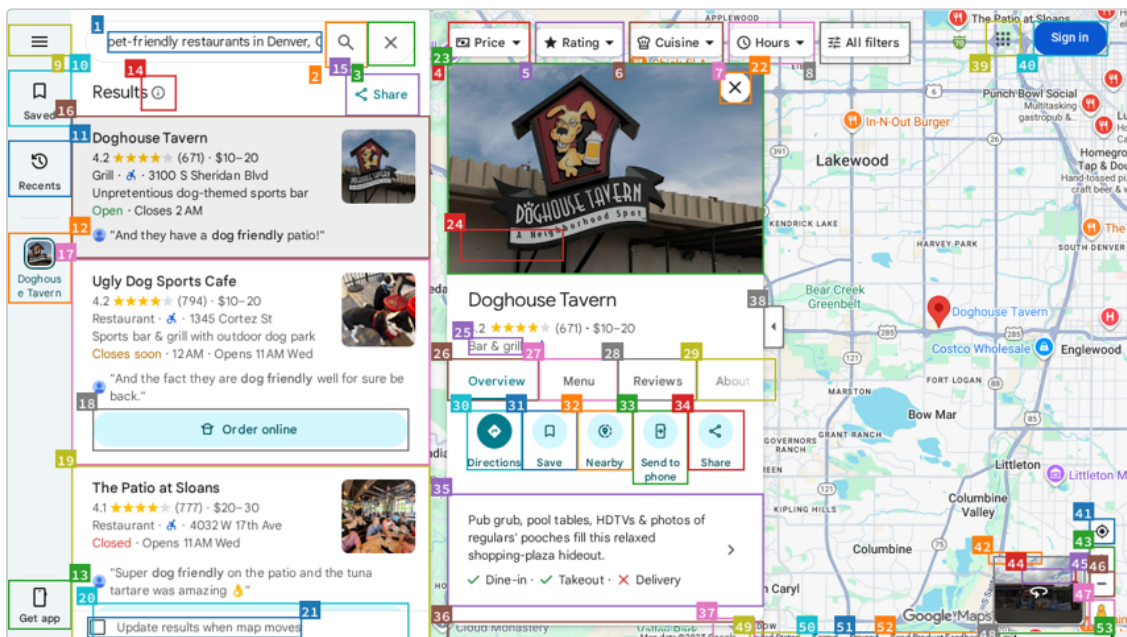



## Response:

Thought: The search results already show a list of pet-friendly restaurants in Denver, CO. I can see the details for Doghouse Tavern, Ugly Dog Sports Cafe, and The Patio at Sloans. Since the task is to find a pet-friendly restaurant, I can stop here and provide the answer.

Action:

```
```json
```

```
{
```

```
  "name": "stop",
```

```
  "arguments": {
```

```
    "answer": "I found a pet-friendly restaurant in Denver, CO: Doghouse Tavern. It has a rating of 4.2 stars, is open from 2 PM to 2 AM, and offers a dog-friendly patio. The address is 3100 S Sheridan Blvd.",
```

```
    "reasoning": "The search results already display a list of pet-friendly restaurants in Denver, CO, including Doghouse Tavern with relevant details."
```

```
  }
```

```
}
```

```
```
```
