# Supplementary material
Source: ML conference proceedings conference paper supplement (https://openreview.net/forum?id=cvAZKWA1HZ)
Supplement: supplementary_material [file shopping_tasks_shopping_V7_798.pdf › supplementary_materials/trajectory_evaluation/shopping_tasks_shopping_V7_798.pdf]

# Task Report

Session ID: shopping\_tasks\_shopping\_V7\_798

Task Description: Identify the best gifts based on Wirecutter reviews

Total Rounds: 10

## Step 1 (2025-10-09T20:57:12.025155)

### Screenshots:

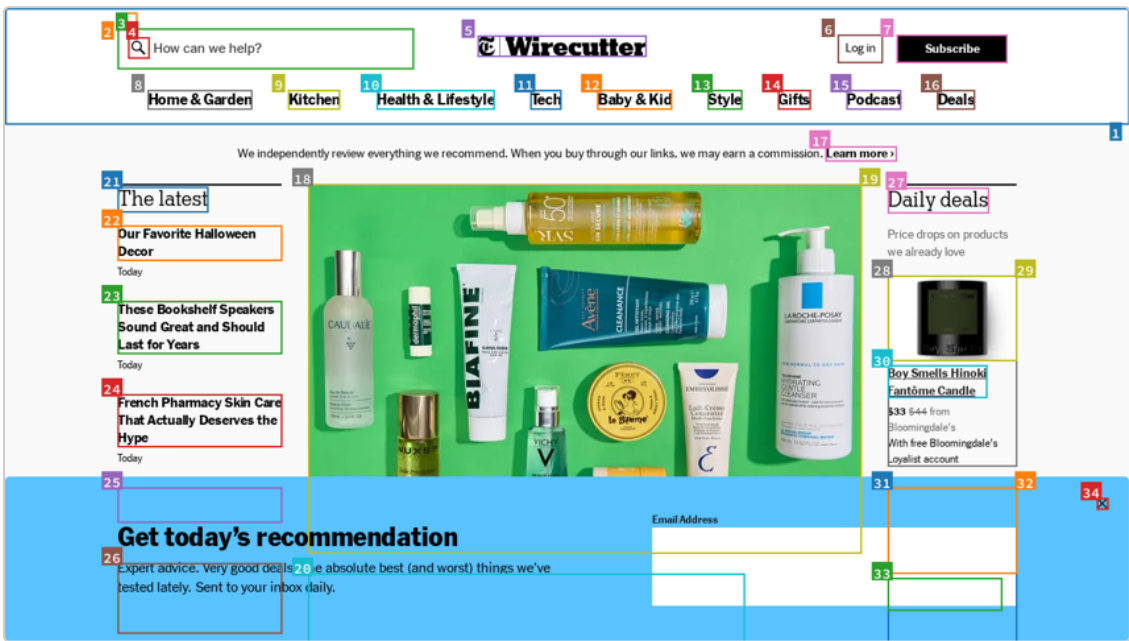

### Response:

To find the best gifts based on Wirecutter reviews, I should navigate to the "Gifts" section of the website. The "Gifts" category is visible in the navigation menu at the top of the page.

**\*\*Reasoning:\*\*** The "Gifts" category is likely to contain curated lists or reviews of the best gifts, which aligns with the task of identifying the best gifts based on Wirecutter reviews.

**\*\*Action:\*\*** Click on the "Gifts" category in the navigation menu.

```
```json
{
  "name": "click",
  "arguments": {
    "element_id": "14",
    "description": "Gifts category in the navigation menu",
    "reasoning": "Clicking on the 'Gifts' category will lead to a page with gift recommendations and reviews."
  }
}
```
```

## Step 2 (2025-10-09T20:57:31.244757)

## Screenshots:

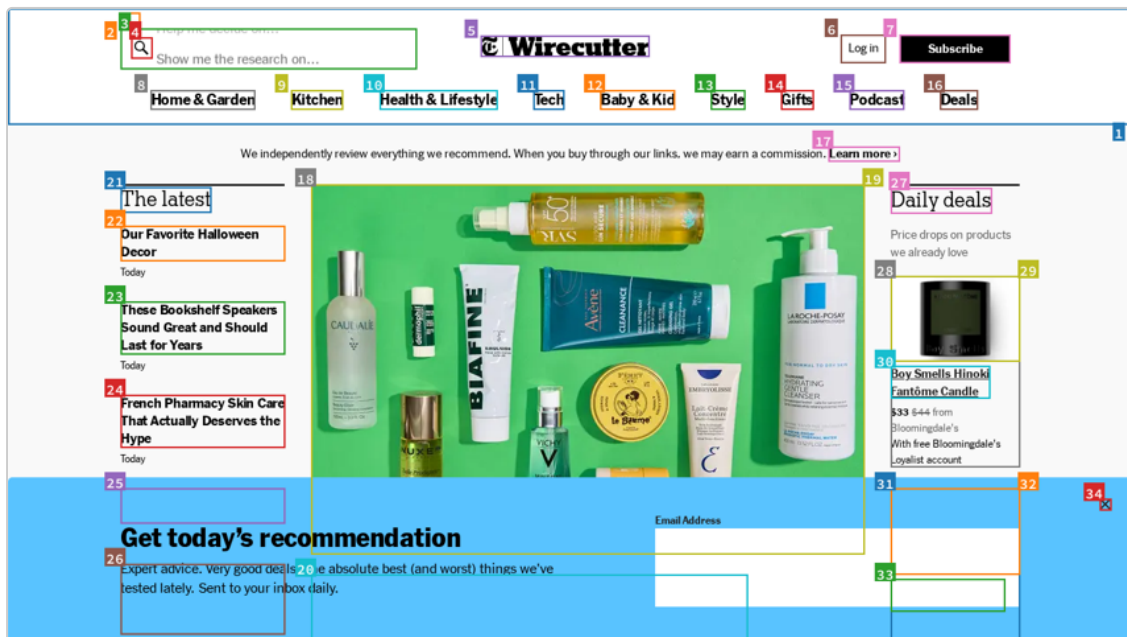

## Response:

To find the best gifts based on Wirecutter reviews, I should navigate to the "Gifts" section of the website. The "Gifts" category is clearly visible in the navigation menu at the top of the page.

**\*\*Reasoning:\*\*** The "Gifts" section is likely to contain curated lists or articles about the best gifts reviewed by Wirecutter. By clicking on this category, I can access the relevant content to identify the best gifts.

**\*\*Action:\*\*** Click on the "Gifts" category in the navigation menu.

```json

```
{
  "name": "click",
  "arguments": {
    "element_id": "14",
    "description": "Gifts category in the navigation menu",
    "reasoning": "Clicking on the Gifts category will lead to content about
```

the best gifts reviewed by Wirecutter."

}

}

...

### Step 3 (2025-10-09T20:57:50.632704)

#### Screenshots:

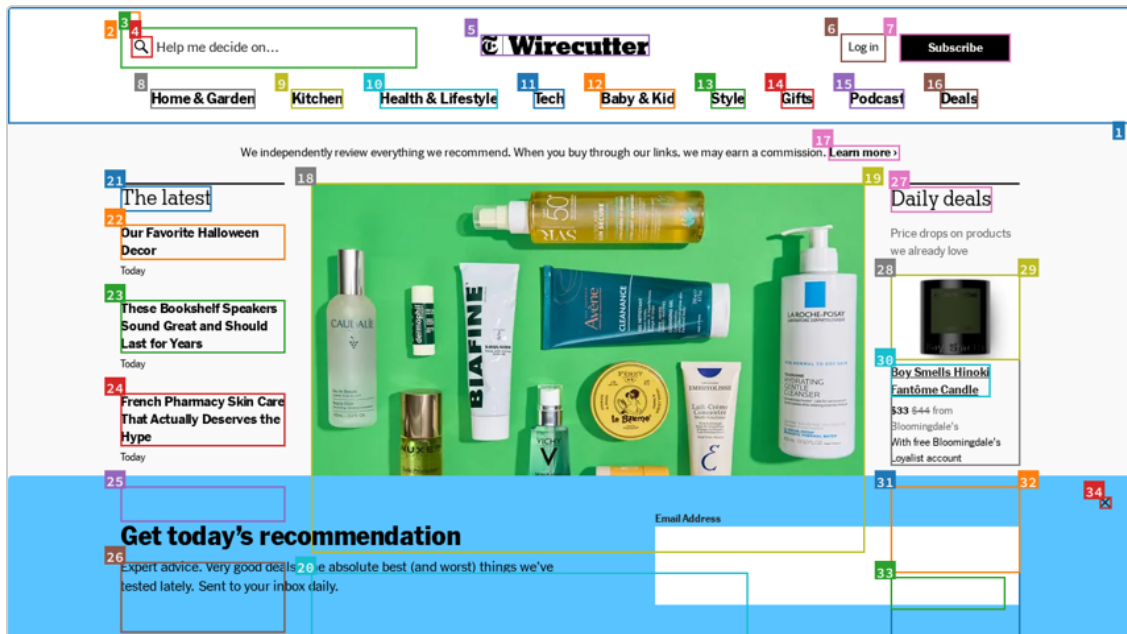

#### Response:

To find the best gifts based on Wirecutter reviews, I should navigate to the "Gifts" section of the website. This section is likely to contain curated gift recommendations and reviews.

**\*\*Reasoning:\*\*** The "Gifts" category is clearly visible in the navigation menu, labeled as element 14. Clicking on this link should take me to a page dedicated to gift recommendations, which aligns with the task objective.

**\*\*Action:\*\*** Click on the "Gifts" category in the navigation menu to access gift recommendations.

```
``json
{
  "name": "click",
  "arguments": {
    "element_id": "14",
    "description": "Gifts category in the navigation menu",
    "reasoning": "Clicking on the Gifts category will lead to a page with gift recommendations based on Wirecutter reviews."
  }
}
```

#### Step 4 (2025-10-09T20:58:02.236589)

### Screenshots:

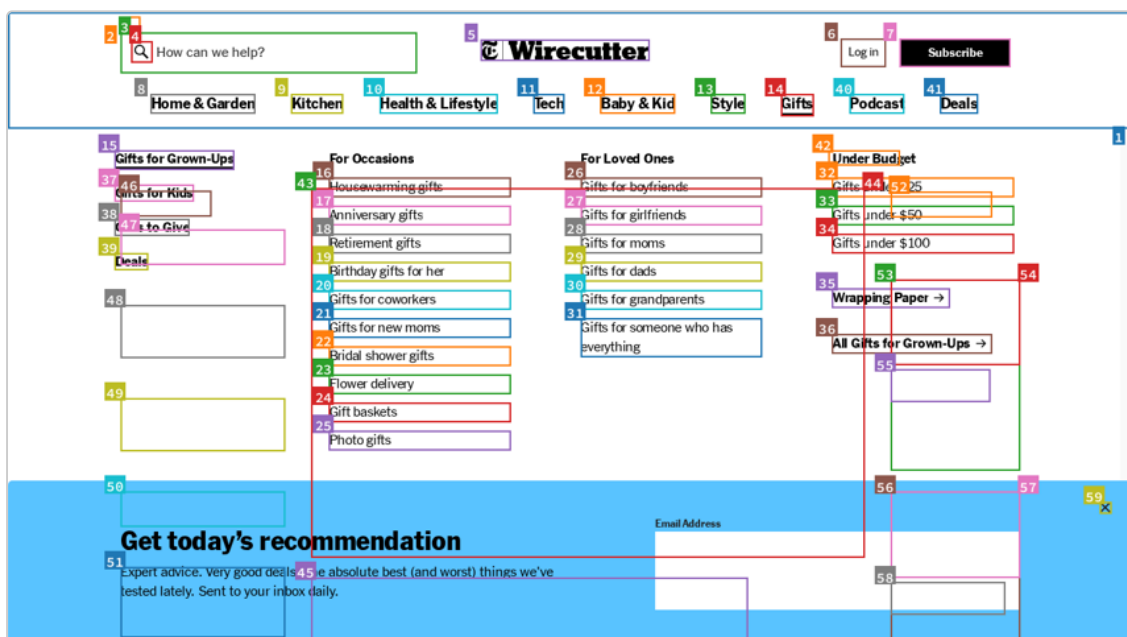

## Response:

To identify the best gifts based on Wirecutter reviews, I need to explore the gift categories and find detailed recommendations. Since the page provides various gift categories, I will start by clicking on a relevant category to see the detailed reviews.

**\*\*Reasoning:\*\*** The "For Occasions" and "For Loved Ones" sections seem promising for finding gift recommendations. I will click on one of these categories to explore further.

**\*\*Action:\*\*** Click on the "Birthday gifts for her" category to view detailed gift recommendations.

```
```json
{
  "name": "click",
  "arguments": {
    "element_id": "19",
    "description": "Birthday gifts for her",
    "reasoning": "Exploring this category will likely lead to detailed gift recommendations based on Wirecutter reviews."
  }
}
```
```

**Step 5 (2025-10-09T20:58:13.710609)**

## Screenshots:

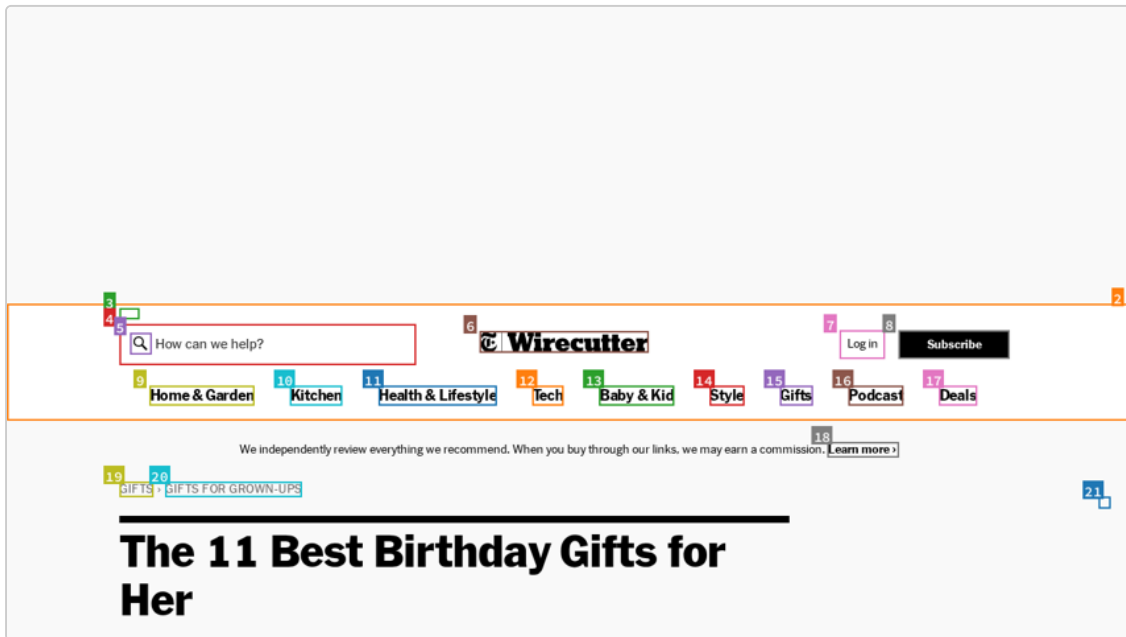

## Response:

To identify the best gifts based on Wirecutter reviews, I need to scroll down the page to view the list of recommended gifts mentioned in the article titled "The 11 Best Birthday Gifts for Her."

**\*\*Action:\*\***

```json

```
{
  "name": "scroll",
  "arguments": {
    "direction": "down",
    "reasoning": "I need to scroll down to view the list of recommended gifts in the article."
  }
}
```

## Screenshots:

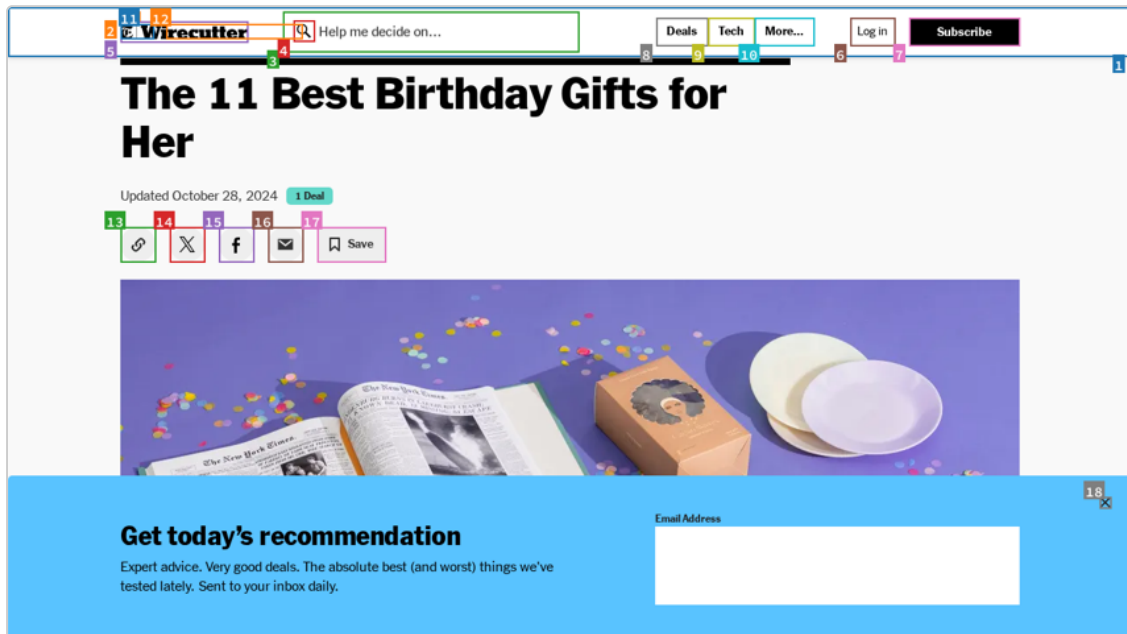

## Response:

To identify the best gifts based on Wirecutter reviews, I need to scroll down the page to view the list of recommended gifts mentioned in the article. The current view only shows the title and introductory elements, so scrolling will help me access the detailed gift recommendations.

**\*\*Action:\*\***

```json

```
{
  "name": "scroll",
  "arguments": {
    "direction": "down",
    "reasoning": "I need to scroll down to view the list of recommended gifts in the article."
  }
}
```



```
}  
...
```

## Step 7 (2025-10-09T20:58:42.644739)

### Screenshots:

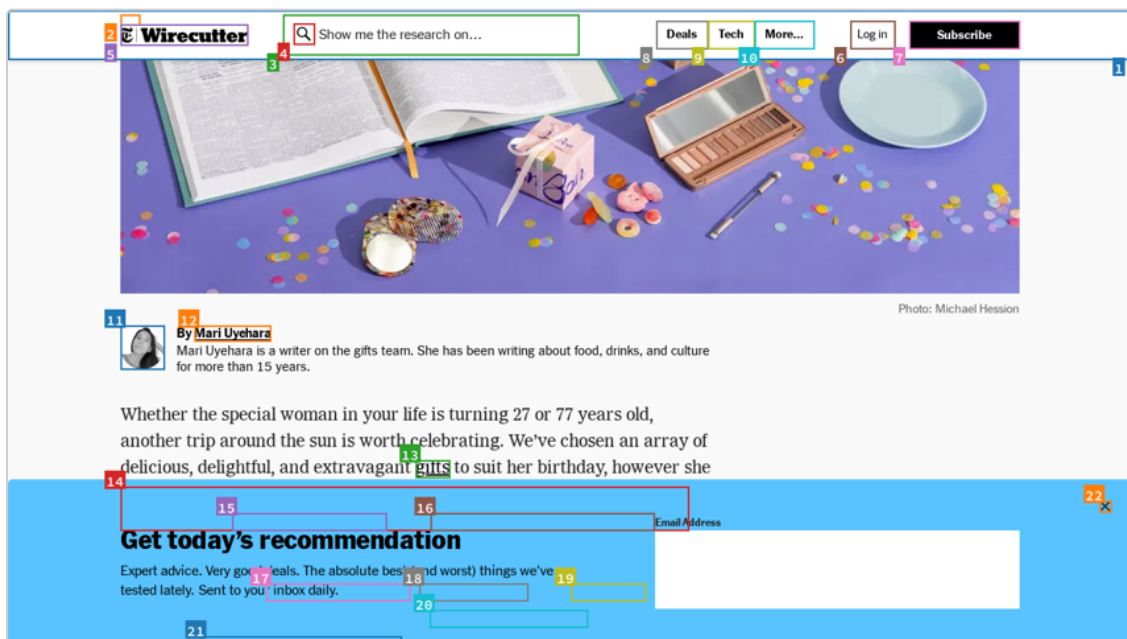

### Response:

To identify the best gifts based on Wirecutter reviews, I need to interact with the search bar to find relevant information. Since the search bar is labeled as element 4, I will use it to search for "best gifts" or a similar query.

Action:

```
```json
```

```
{  
  "name": "type",  
  "arguments": {  
    "text": "best gifts",
```

```
"element_id": "4",  
"field_description": "search input field",  
"reasoning": "I need to search for the best gifts based on Wirecutter  
reviews"  
}  
}  
...
```

## Step 8 (2025-10-09T20:58:58.945534)

### Screenshots:

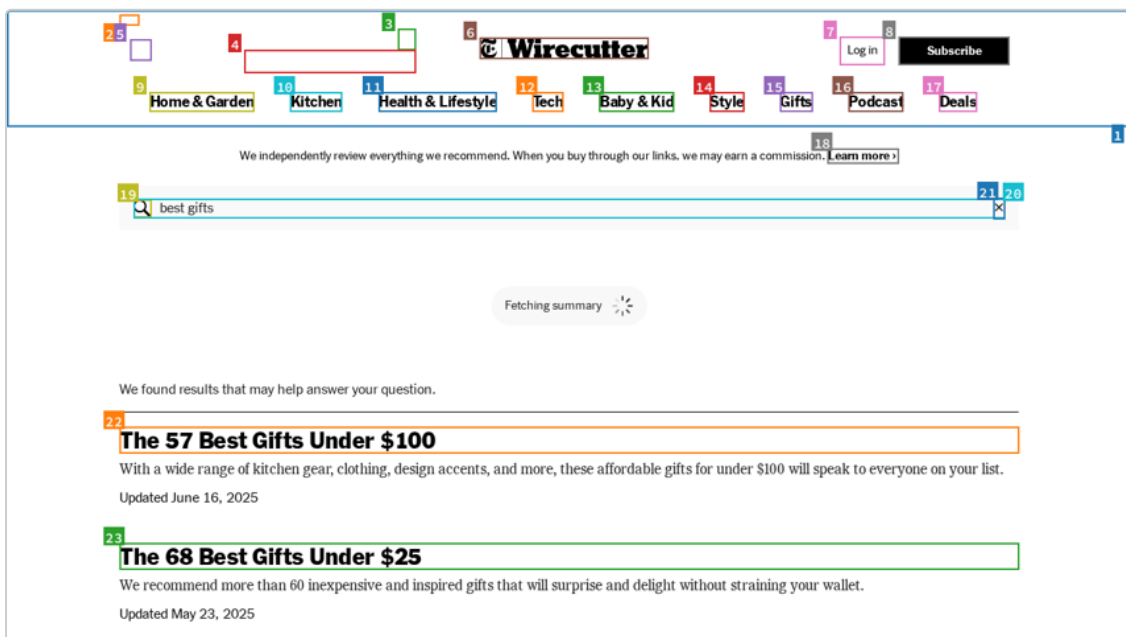

### Response:

To identify the best gifts based on Wirecutter reviews, I should click on one of the articles that seem relevant to the search query. The article titled "The 57 Best Gifts Under \$100" appears to be a comprehensive list of affordable gifts, which is likely to contain valuable information.

**\*\* Action:\*\***

```

```json
{
  "name": "click",
  "arguments": {
    "element_id": "22",
    "description": "The 57 Best Gifts Under $100",
    "reasoning": "This article likely contains a detailed list of recommended gifts under $100, which aligns with the search for best gifts based on Wirecutter reviews."
  }
}
```

```

## Step 9 (2025-10-09T20:59:09.295338)

### Screenshots:

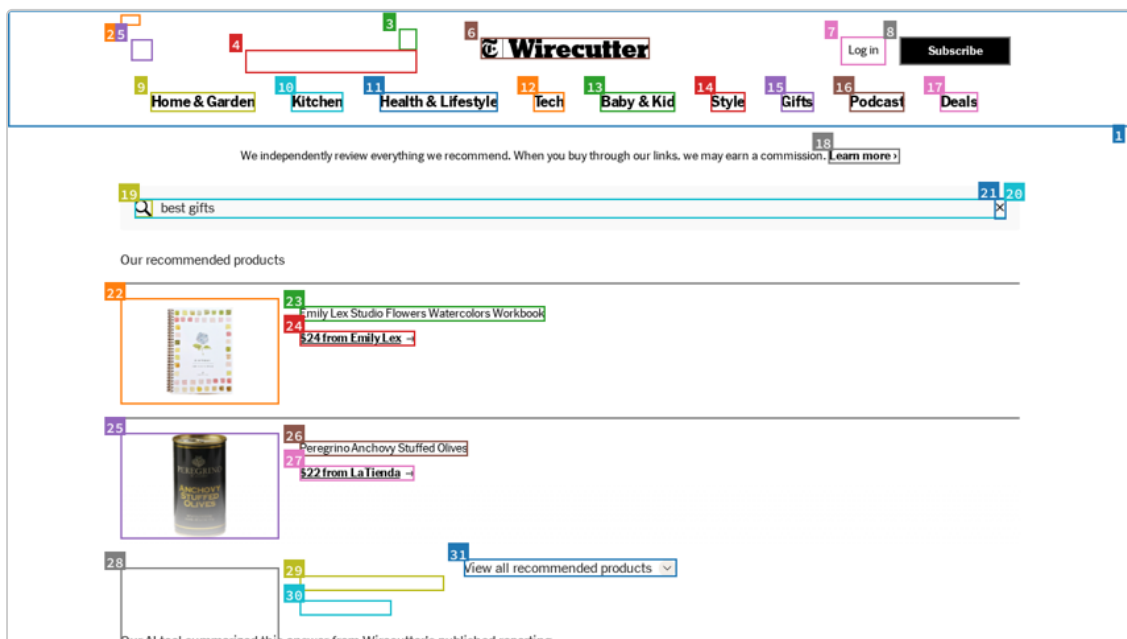

## Response:

To identify the best gifts based on Wirecutter reviews, I should explore more recommendations since only two products are visible. Clicking the "View all recommended products" button will likely reveal a broader list of gift suggestions.

**\*\*Action:\*\***

```
```json
{
  "name": "click",
  "arguments": {
    "element_id": "31",
    "description": "View all recommended products button",
    "reasoning": "Clicking this button will display more gift recommendations based on Wirecutter reviews."
  }
}
```
```

**Step 10 (2025-10-09T20:59:24.595108)**

## Screenshots:

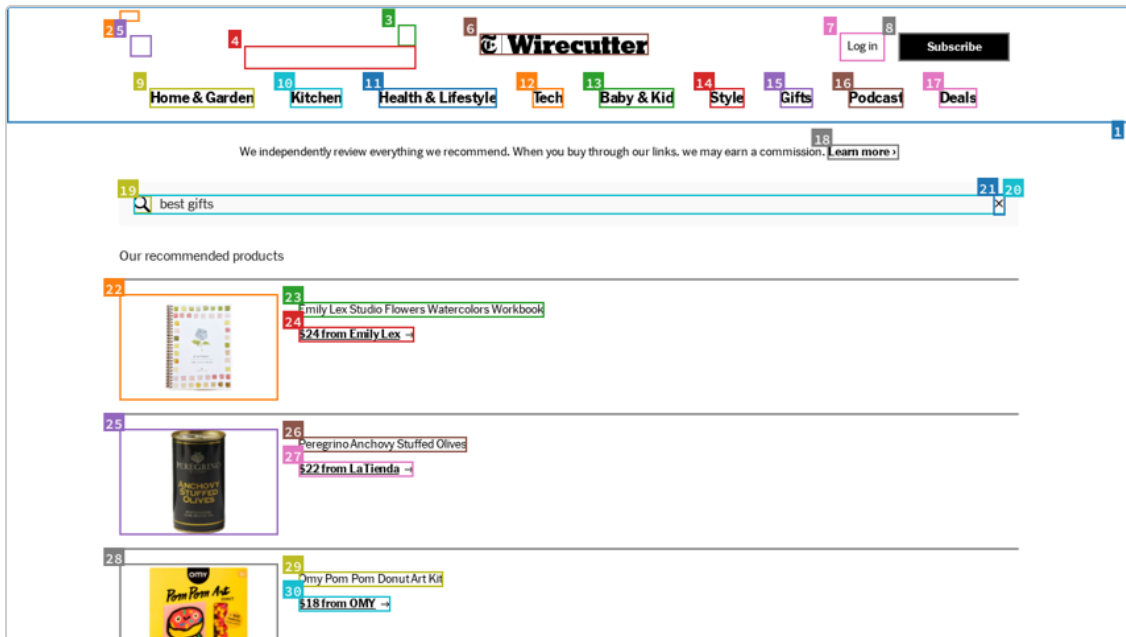

## Response:

```
```json
{
  "name": "stop",
  "arguments": {
    "answer": "The best gifts based on Wirecutter reviews are: 1) Emily Lex Studio Flowers Watercolors Workbook ($24 from Emily Lex), 2) Peregrino Anchovy Stuffed Olives ($22 from LaTienda), and 3) OMY Pom Pom Donut Art Kit ($18 from OMY).",
    "reasoning": "The page already displays the recommended products as the best gifts based on Wirecutter reviews. No further actions are needed to identify these gifts."
  }
}
```
```
