# Supplementary material
Source: ML conference proceedings conference paper supplement (https://openreview.net/forum?id=cvAZKWA1HZ)
Supplement: supplementary_material [file shopping_tasks_shopping_V71_1142.pdf › supplementary_materials/trajectory_evaluation/shopping_tasks_shopping_V71_1142.pdf]

# Task Report

**Session ID:** shopping\_tasks\_shopping\_V71\_1142

**Task Description:** Retrieve and display the latest news articles related to a specific topic

**Total Rounds:** 5

## Step 1 (2025-10-07T11:42:28.824704)

### Screenshots:

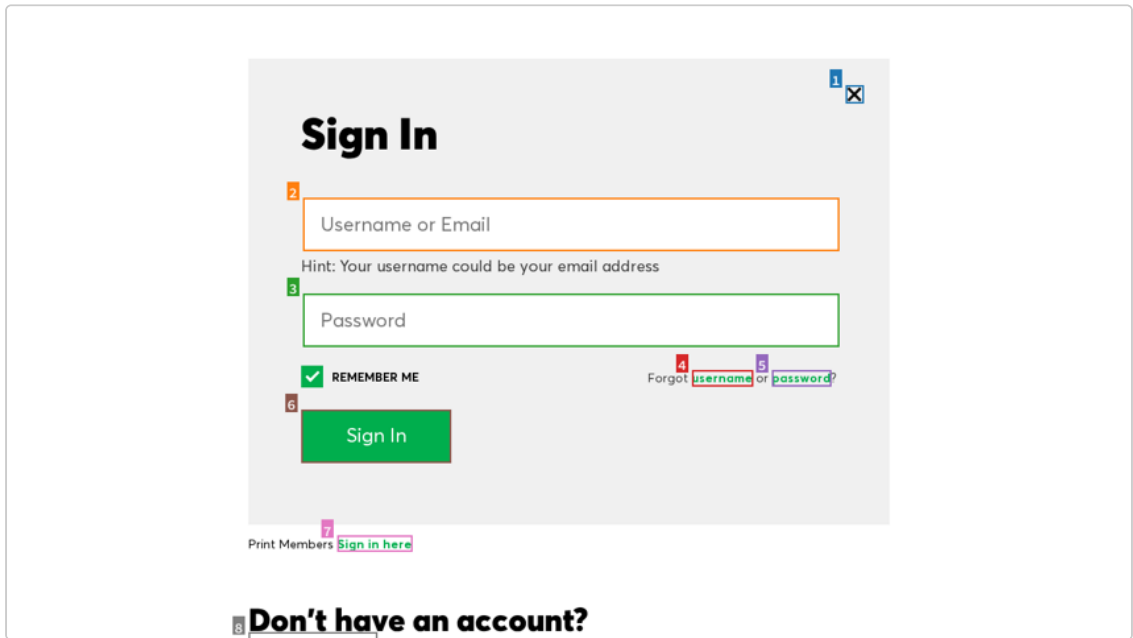

### Response:

To retrieve and display the latest news articles related to a specific topic, I need to navigate to a search engine or a news website. Since the current

page is a sign-in page, I should first exit this page and go to a search engine.

**\*\*Action:\*\***

```
```json
```

```
{
```

```
  "name": "goto_url",
```

```
  "arguments": {
```

```
    "page_name": "search engine",
```

```
    "reasoning": "I need to navigate to a search engine to find the latest news articles related to a specific topic."
```

```
  }
```

```
}
```

```
```
```

## Step 2 (2025-10-07T11:42:45.538533)

### Screenshots:

The screenshot shows a 'Sign In' form with the following elements and annotations:

- 1**: Close button (X) in the top right corner.
- 2**: 'Username or Email' input field.
- 3**: 'Password' input field.
- 4**: 'Forgot' link.
- 5**: 'username' link.
- 6**: 'password' link.
- 7**: 'Sign in here' link.

Other visible text includes: 'Sign In' (title), 'Hint: Your username could be your email address', 'REMEMBER ME' (checkbox), and 'Print Members'.

**8** Don't have an account?

## Response:

To retrieve and display the latest news articles related to a specific topic, I need to navigate away from this sign-in page to a search engine or news website. Since I'm currently on a sign-in page, my first step will be to exit this page and proceed to a search engine.

Action: `{{"name": "click", "arguments": {"element_id": "1", "description": "Close button of the sign-in page", "reasoning": "I need to exit the sign-in page to proceed with the task of finding news articles."}}}`

## Step 3 (2025-10-07T11:42:56.561819)

## Screenshots:

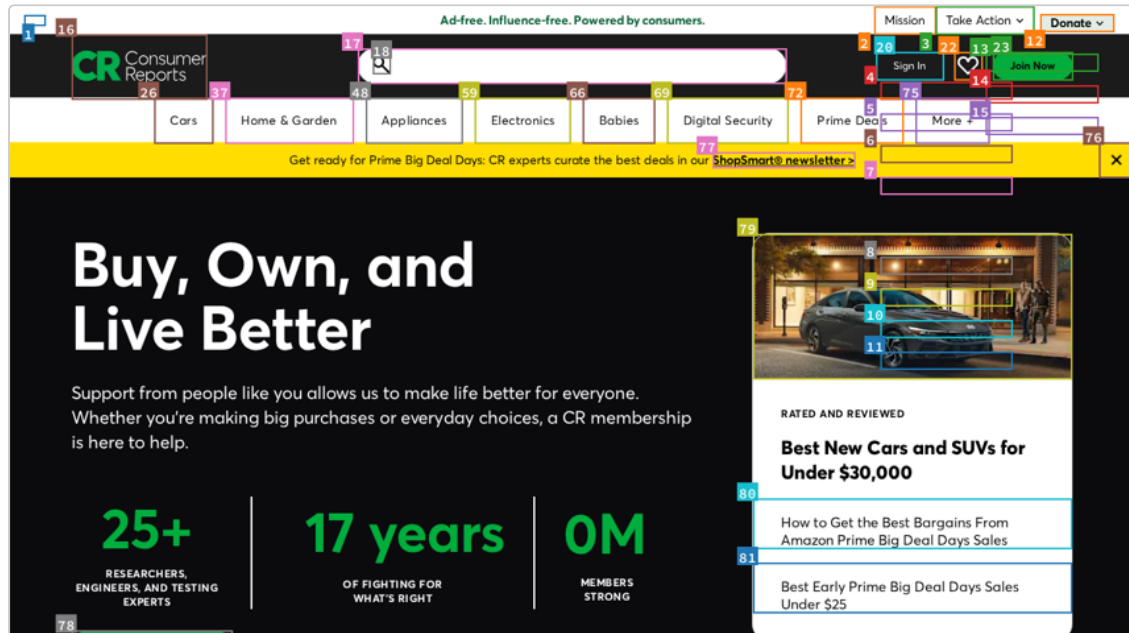

## Response:

To retrieve and display the latest news articles related to a specific topic, I need to first identify the search functionality on the page. The search bar

is visible at the top of the page, which is a common place for entering search queries.

**\*\*Reasoning:\*\*** The search bar is the most logical starting point to find news articles related to a specific topic. By typing the topic into the search bar, I can initiate a search and retrieve relevant articles.

**\*\*Action:\*\*** I will type the specific topic into the search bar and then press enter to initiate the search.

```
```json
{
  "name": "type",
  "arguments": {
    "text": "specific topic", // Replace "specific topic" with the actual topic
    you want to search for.
    "element_id": "18",
    "field_description": "search input field",
    "reasoning": "I need to search for the latest news articles related to the
    specific topic"
  }
}
```
```

#### Step 4 (2025-10-07T11:43:13.027715)

## Screenshots:

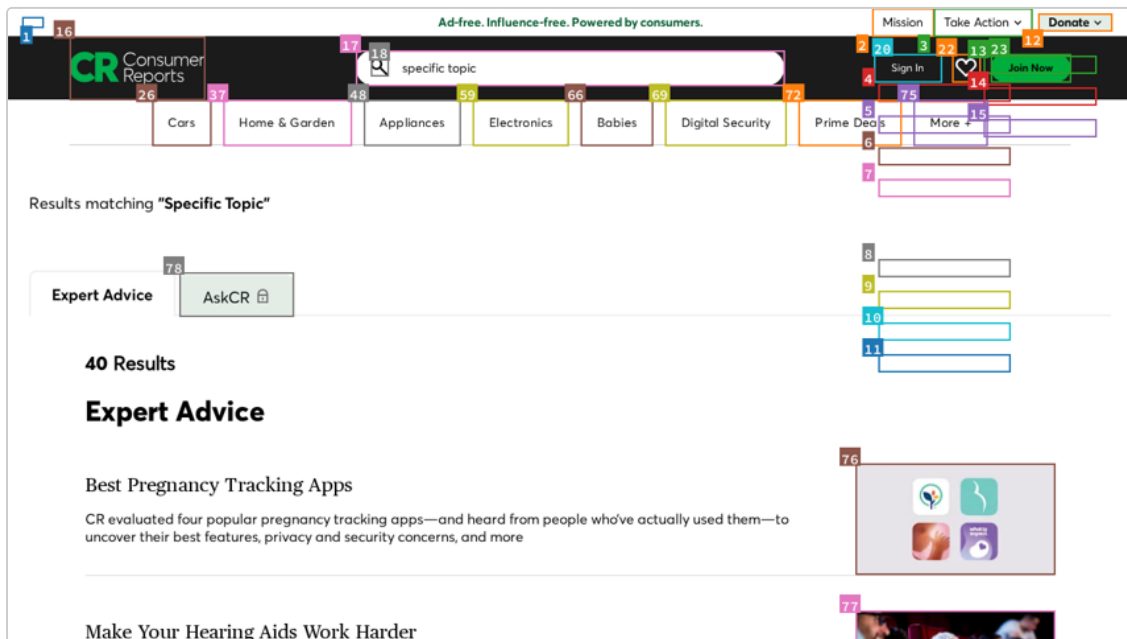

## Response:

To retrieve and display the latest news articles related to a specific topic, I need to first identify the search bar and input the relevant search term. Since the search bar is already visible, I will proceed with typing the search term.

Action:

```
```json
```

```
{  
  "name": "type",  
  "arguments": {  
    "text": "latest news on [specific topic]",  
    "element_id": "18",  
    "field_description": "search input field",  
    "reasoning": "I need to search for the latest news articles related to the specific topic"  
  }  
}
```

}  
...

## Step 5 (2025-10-07T11:43:33.625610)

### Screenshots:

#### Laptops Can Feel Like a Heater After a While. Lap Desks Can Help

Lap desks that allow you to work comfortably away from your desk and chair. CR evaluated several to find out which ones kept us cooler and provided the most storage options.

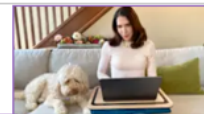

25  
26

#### Yes, You Need to Clean and Sanitize Your Kitchen Sink and Drain More Often

According to cleaning experts, your kitchen sink and drain need to be cleaned more often than you'd think.

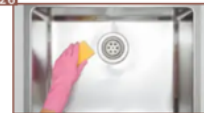

#### What Is PVA and What Is It Used For?

CR looked at polyvinyl alcohol, or PVA, an ingredient in laundry detergent sheets to find out whether these cleaners are as sustainable as claimed.

27

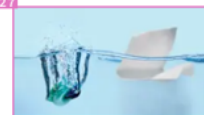

#### Best Baby Tracking Apps

CR recruited dozens of users to share to evaluate baby tracking apps. We also assessed these baby tracking apps for ease of use, privacy, and security.

28

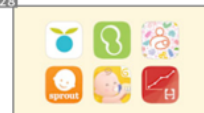

#### Do You Need an E-Bike-Specific Helmet?

29

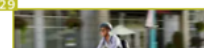

### Response:

To retrieve and display the latest news articles related to a specific topic, I need to know the topic you are interested in. Please provide the topic so I can proceed with the search and retrieval process. If you have a specific topic in mind, please share it, and I will take the necessary actions to find the latest news articles related to that topic. If no topic is provided, I will stop and explain that I need more information to proceed.

Action:

```json

{

"name": "stop",

```
"arguments": {  
  "answer": "I need the specific topic to search for the latest news articles.  
Please provide the topic so I can proceed.",  
  "reasoning": "The task requires a specific topic to search for the latest  
news articles, but it has not been provided."  
}  
}  
...
```
