# Supplementary material
Source: ML conference proceedings conference paper supplement (https://openreview.net/forum?id=cvAZKWA1HZ)
Supplement: supplementary_material [file tech_tasks_tech_V1_new_760.pdf › supplementary_materials/trajectory_evaluation/tech_tasks_tech_V1_new_760.pdf]

# Task Report

**Session ID:** tech\_tasks\_tech\_V1\_new\_760

**Task Description:** Verify if the article includes any prerequisites before enabling AirDrop over internet

**Total Rounds:** 6

**Step 1** (2025-10-08T08:02:08.620755)

## Screenshots:

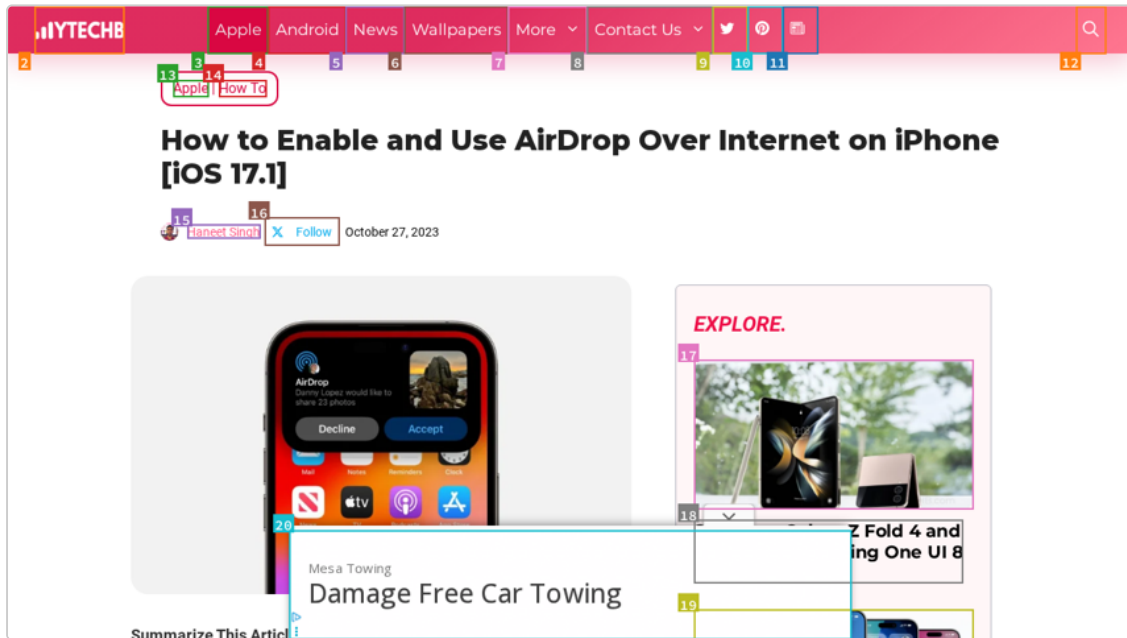

## Response:

To verify if the article includes any prerequisites before enabling AirDrop over the internet, I need to scroll through the content to find relevant

information.

**\*\*Action:\*\***

```json

{

  "name": "scroll",

  "arguments": {

    "direction": "down",

    "reasoning": "I need to scroll through the article to find any prerequisites mentioned for enabling AirDrop over the internet."

  }

}

```

## Step 2 (2025-10-08T08:02:25.390954)

### Screenshots:

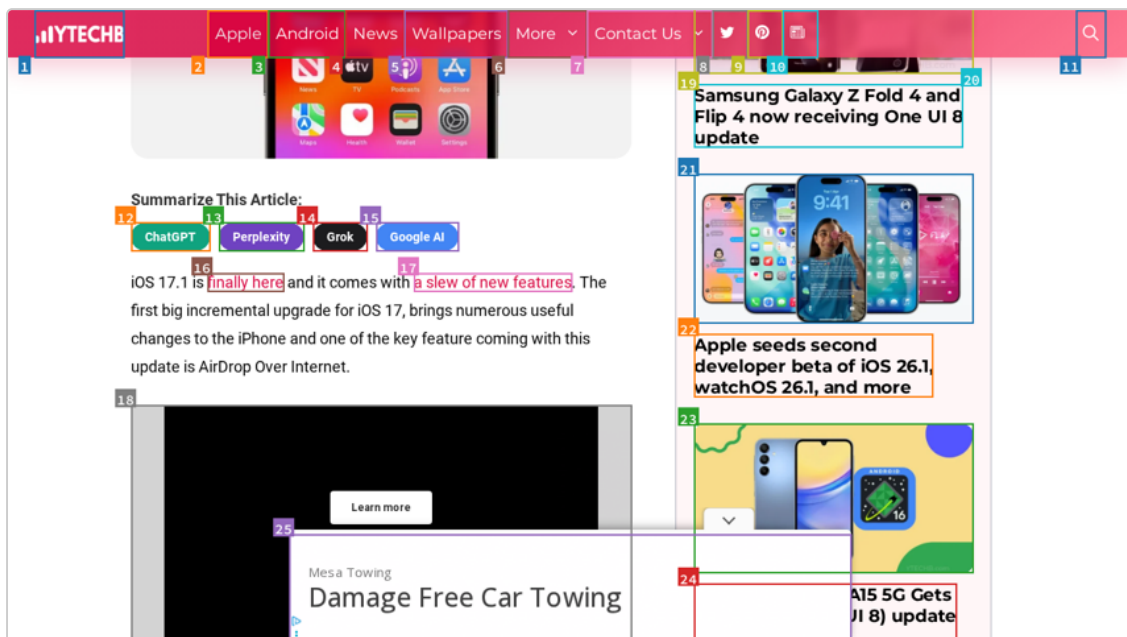

## Response:

To verify if the article includes any prerequisites before enabling AirDrop over the internet, I need to scroll down the page to read more of the article content. The current view only shows a summary, so I will scroll to find detailed information.

**\*\*Action:\*\***

```
```json
{
  "name": "scroll",
  "arguments": {
    "direction": "down",
    "reasoning": "I need to scroll down to read more of the article and find information about prerequisites for enabling AirDrop over the internet."
  }
}
```
```

**Step 3** (2025-10-08T08:02:33.937582)

## Screenshots:

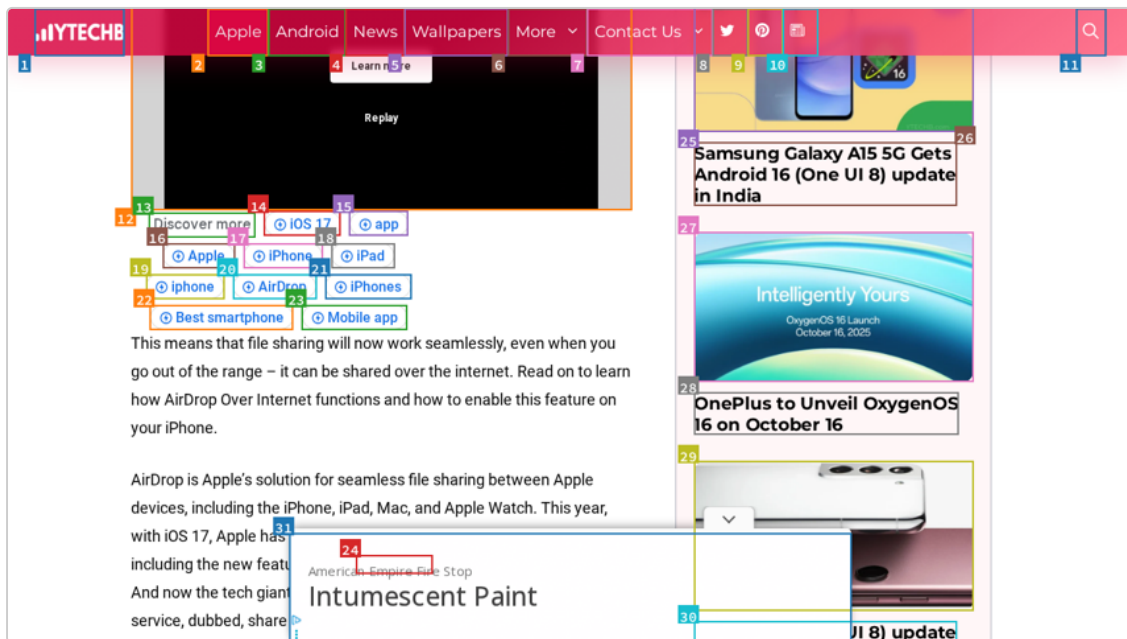

## Response:

To verify if the article includes any prerequisites before enabling AirDrop over the internet, I need to scroll down to read more of the content since the visible portion doesn't provide this information.

**\*\*Action:\*\***

```json

{

  "name": "scroll",

  "arguments": {

    "direction": "down",

    "reasoning": "I need to scroll down to find more information about prerequisites for enabling AirDrop over the internet."

  }

}

```

## Screenshots:

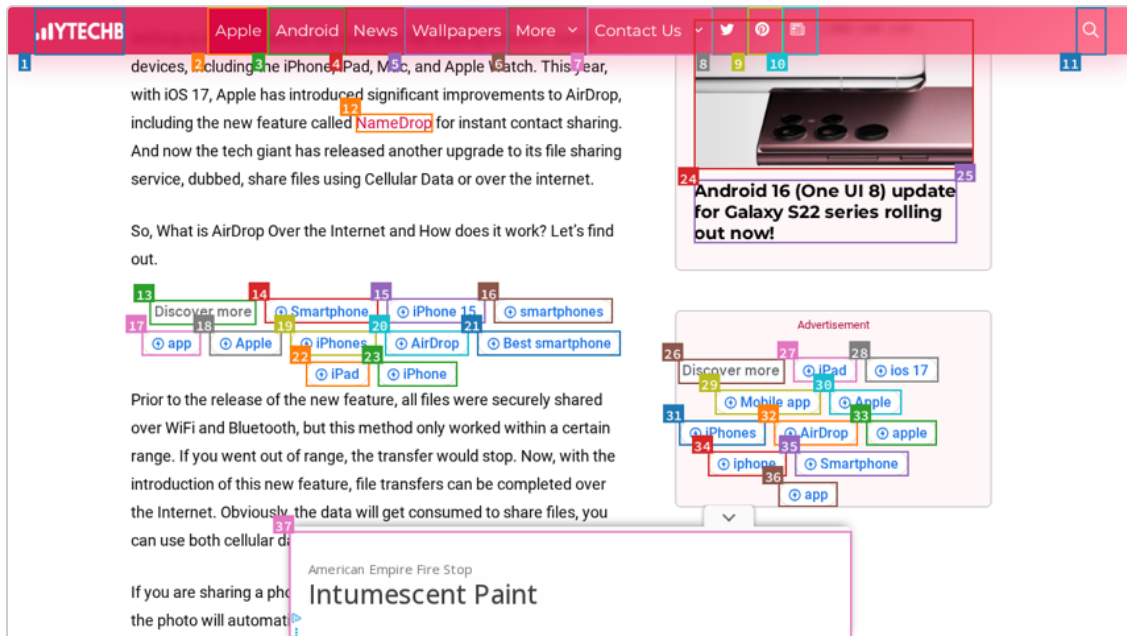

## Response:

To verify if the article includes any prerequisites before enabling AirDrop over the internet, I need to scroll through the page to find more information, as the current view does not provide details about prerequisites.

**\*\*Action:\*\***

**```json**

```
{
  "name": "scroll",
  "arguments": {
    "direction": "down",
    "reasoning": "I need to scroll down to find more information about prerequisites for enabling AirDrop over the internet."
  }
}
```

```
}  
...
```

## Step 5 (2025-10-08T08:03:00.920561)

### Screenshots:

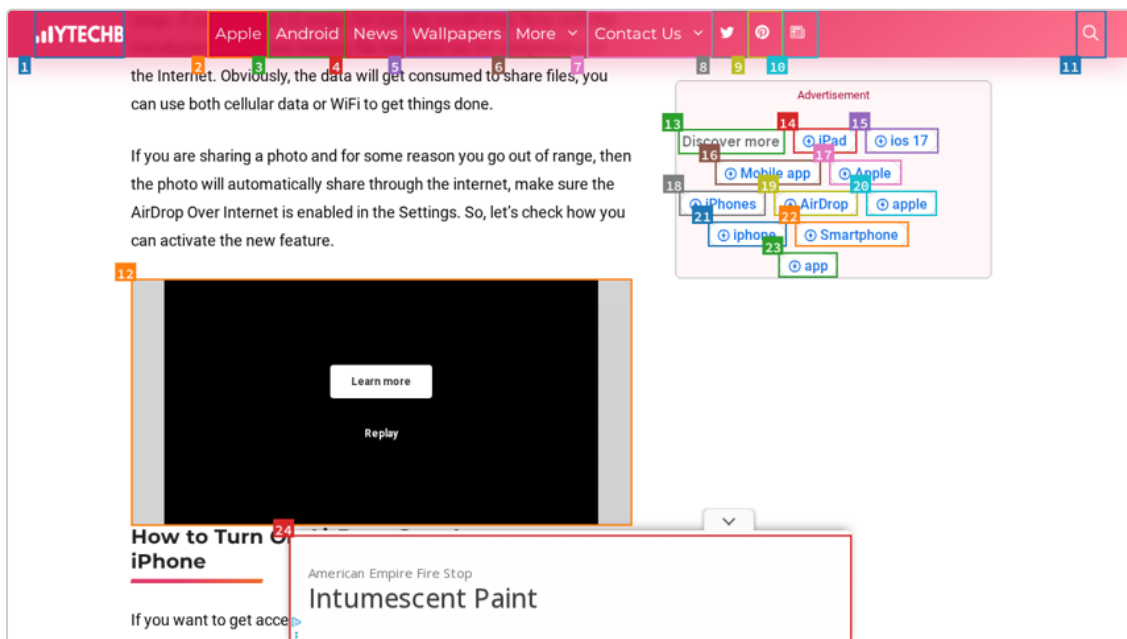

### Response:

To verify if the article includes any prerequisites before enabling AirDrop over the internet, I need to carefully analyze the text content. The current visible portion of the article mentions enabling AirDrop Over Internet in the Settings but does not explicitly state any prerequisites. I will scroll down to see if there are additional details or prerequisites mentioned further in the article.

**\*\*Action:\*\***

```
```json
```

```
{
```

```
  "name": "scroll",
```

```

"arguments": {
  "direction": "down",
  "reasoning": "I need to scroll down to find more information about
prerequisites for enabling AirDrop over the internet."
}
}
...

```

## Step 6 (2025-10-08T08:03:15.732175)

### Screenshots:

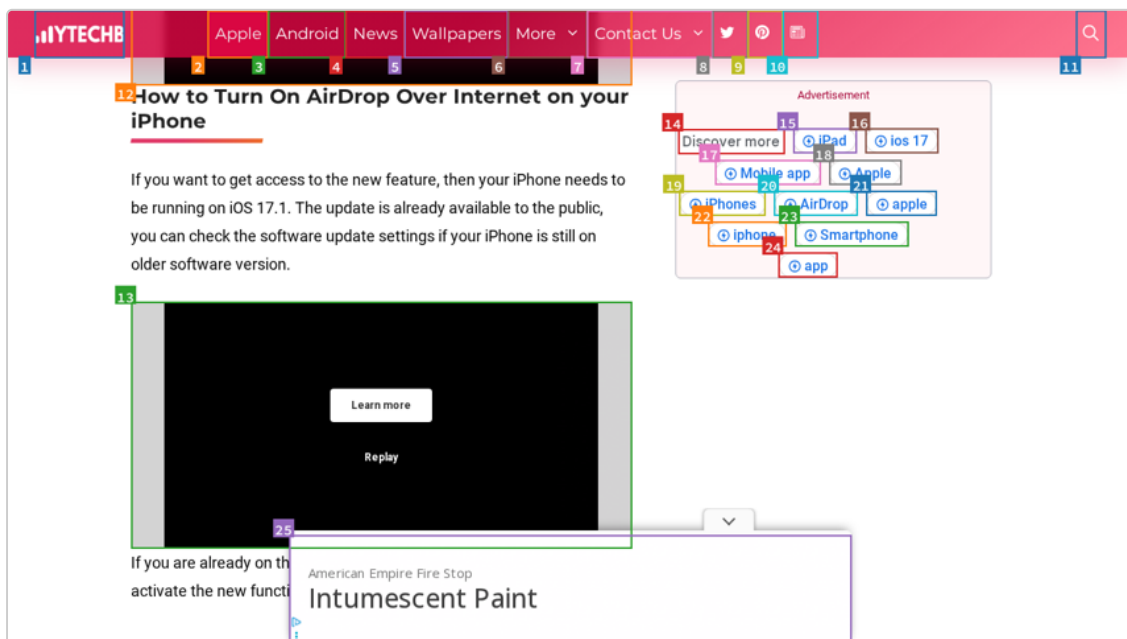

### Response:

To verify if the article includes any prerequisites before enabling AirDrop over the internet, I need to analyze the visible content and determine if there are any specific requirements mentioned. The visible text indicates that the iPhone needs to be running on iOS 17.1, which is a prerequisite. Since this information is already visible, I can conclude the task without further actions.

**\*\*Action:\*\***

```json

{

"name": "stop",

"arguments": {

"answer": "The article mentions that your iPhone needs to be running on iOS 17.1 as a prerequisite to enable AirDrop over the internet.",

"reasoning": "The visible text in the article explicitly states that iOS 17.1 is required, which serves as the prerequisite for enabling the feature."

}

}

```
