# Supplementary material
Source: ML conference proceedings conference paper supplement (https://openreview.net/forum?id=cvAZKWA1HZ)
Supplement: supplementary_material [file tech_tasks_tech_V71_2141.pdf › supplementary_materials/trajectory_evaluation/tech_tasks_tech_V71_2141.pdf]

# Task Report

Session ID: tech\_tasks\_tech\_V71\_2141

Task Description: Compare two curated GitHub lists by popularity

Total Rounds: 10

## Step 1 (2025-10-07T13:59:37.214283)

### Screenshots:

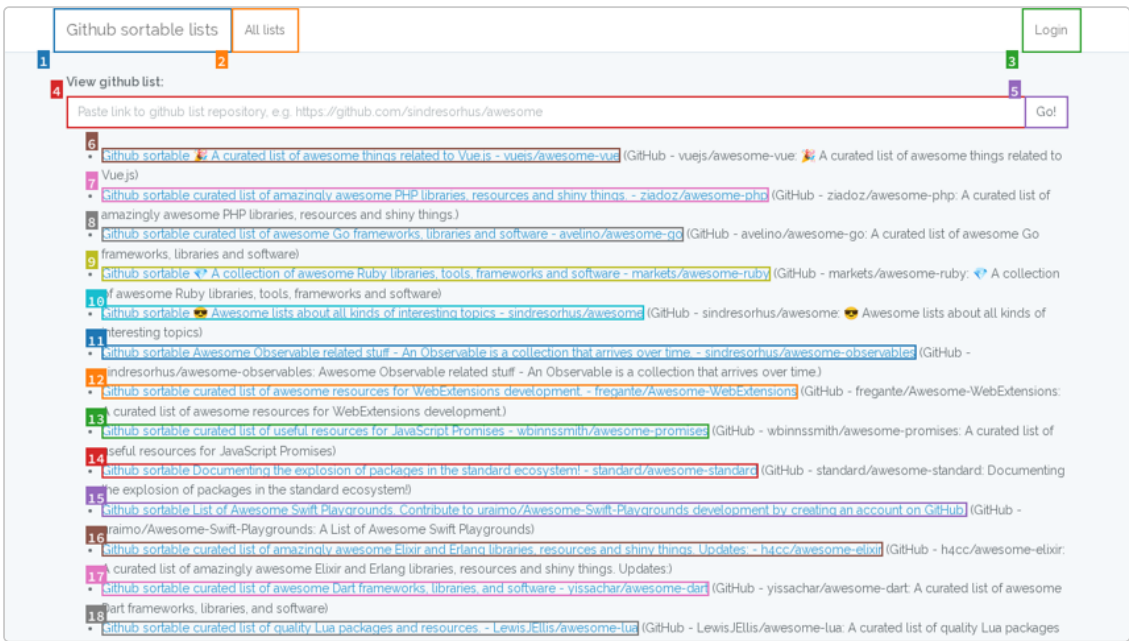

### Response:

To compare two curated GitHub lists by popularity, I need to identify two lists from the provided options and then determine their popularity metrics, such as stars, forks, or contributors. Since the current page does not

display these metrics, I will need to visit the GitHub repositories directly to gather this information.

### Reasoning:

1. **Identify Two Lists:** I will select two GitHub lists from the provided links.
2. **Visit GitHub Repositories:** Click on the links to open the GitHub repositories.
3. **Compare Popularity Metrics:** Once on the GitHub pages, I will look for metrics like stars, forks, or contributors to compare the popularity of the two lists.

### Action:

I will start by clicking on the first GitHub list link to open its repository page.

```
```json
{
  "name": "click",
  "arguments": {
    "element_id": "6",
    "description": "Link to Vue.js awesome list",
    "reasoning": "I need to visit the GitHub repository to check its popularity metrics."
  }
}
```
```

**Step 2** (2025-10-07T13:59:53.160983)

## Screenshots:

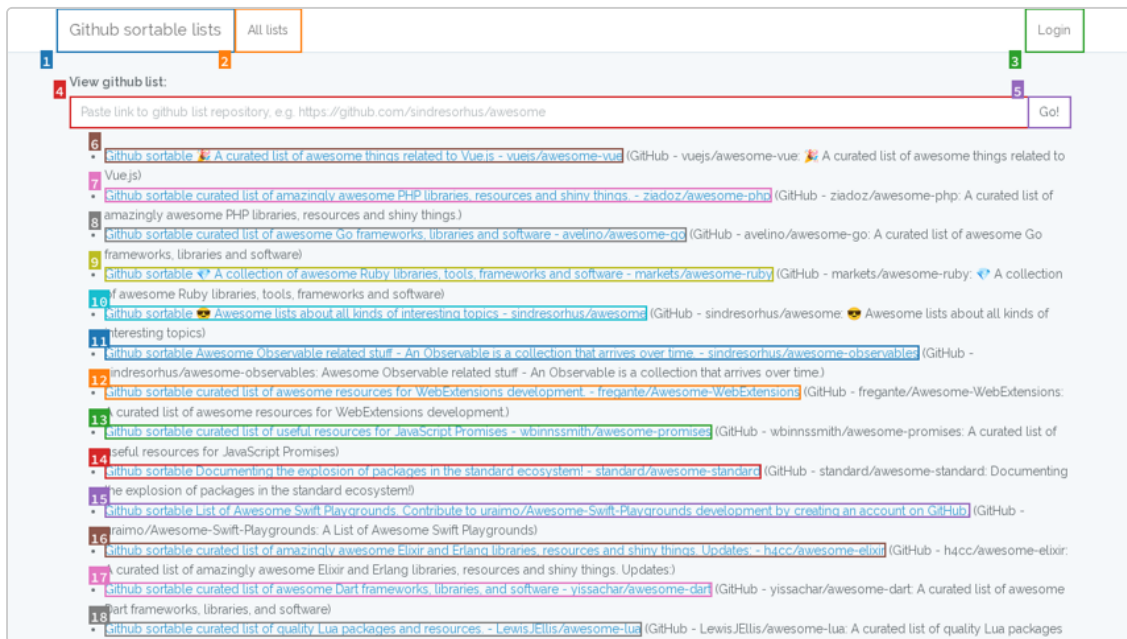

## Response:

To compare two curated GitHub lists by popularity, I need to first select two lists from the provided options. Since the task doesn't specify which lists to compare, I'll choose two popular ones based on their titles and descriptions. I'll start by clicking on the first list titled "Github sortable A curated list of awesome things related to Vue.js."

Action:

```
```json
```

```
{
  "name": "click",
  "arguments": {
    "element_id": "6",
    "description": "Github sortable A curated list of awesome things related to Vue.js",
    "reasoning": "Select the first GitHub list to compare its popularity."
  }
}
```

```
}  
...
```

### Step 3 (2025-10-07T14:00:06.306360)

#### Screenshots:

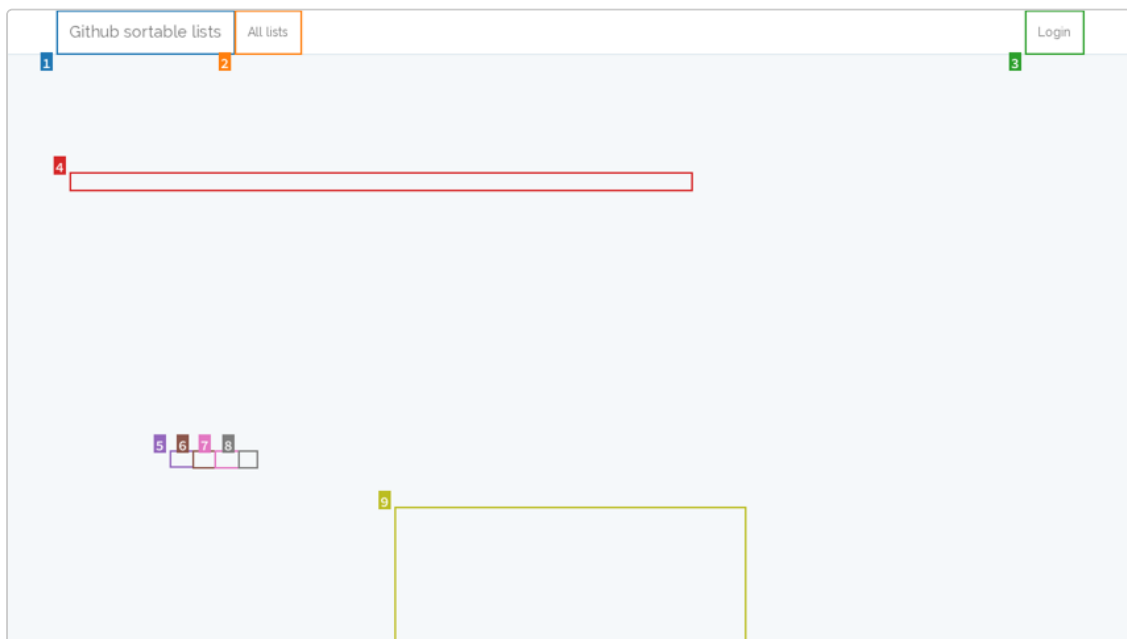

#### Response:

To compare two curated GitHub lists by popularity, I need to first access the lists. The "Github sortable lists" tab (1) seems like the logical starting point. Clicking on it should display the lists that can be compared.

**\*\*Reasoning:\*\*** The "Github sortable lists" tab is likely where the curated lists are located. By clicking on it, I can view the lists and proceed with comparing them by popularity.

```
```json  
{  
  "name": "click",
```

```

"arguments": {
  "element_id": "1",
  "description": "Github sortable lists tab",
  "reasoning": "Clicking this tab will display the curated GitHub lists for
comparison."
}
}
...

```

## Step 4 (2025-10-07T14:00:19.880348)

### Screenshots:

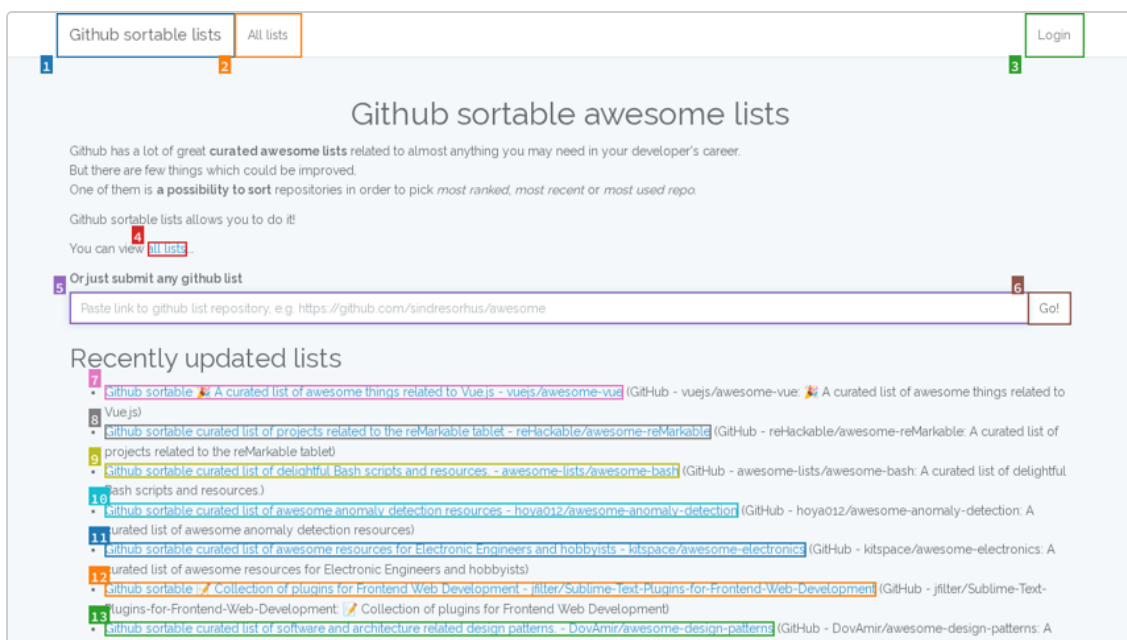

### Response:

To compare two curated GitHub lists by popularity, I need to identify two lists and determine their popularity metrics. The page provides a list of recently updated GitHub curated lists, which I can use as a starting point. I will select two lists from this section and compare their popularity based on the information provided.

**\*\*Action:\*\***

I will click on the first list in the "Recently updated lists" section to view its details and popularity metrics.

```
```json
{
  "name": "click",
  "arguments": {
    "element_id": "7",
    "description": "First list in the 'Recently updated lists' section",
    "reasoning": "I need to view the details of the first list to compare its popularity with another list."
  }
}
```
```

## Step 5 (2025-10-07T14:00:41.491481)

### Screenshots:

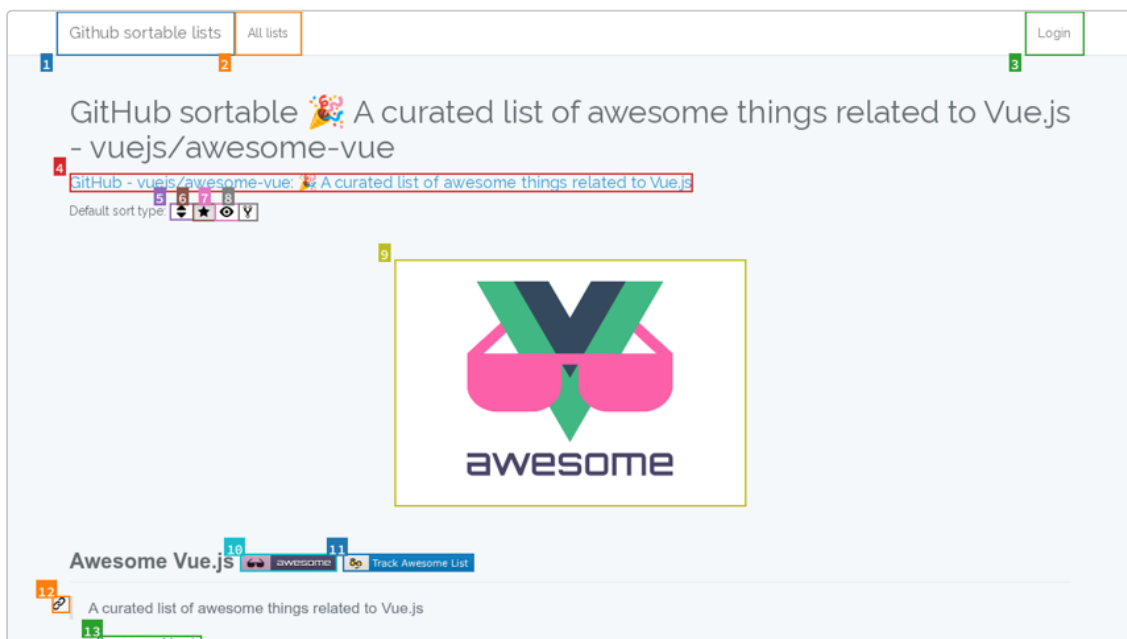

## Response:

To compare two curated GitHub lists by popularity, I need to identify and interact with elements that allow sorting or filtering by popularity metrics, such as stars, forks, or other indicators. The current page shows sorting options below the title, which might help in comparing lists based on popularity.

### Reasoning:

1. **Identify Sorting Options**: The sorting icons (e.g., stars, forks) below the title suggest ways to sort the lists. I should interact with these to sort the lists by popularity.
2. **Compare Popularity**: After sorting, I can compare the curated lists based on their popularity metrics.
3. **Stop and Provide Answer**: Once I have the sorted lists, I can stop and provide a brief explanation of the comparison.

### Action:

I will click on the sorting icon that likely represents popularity (e.g., stars).

```
```json
{
  "name": "click",
  "arguments": {
    "element_id": "6",
    "description": "Sorting icon for popularity (stars)",
    "reasoning": "Clicking this will sort the lists by popularity, allowing comparison."
  }
}
```
```

## Screenshots:

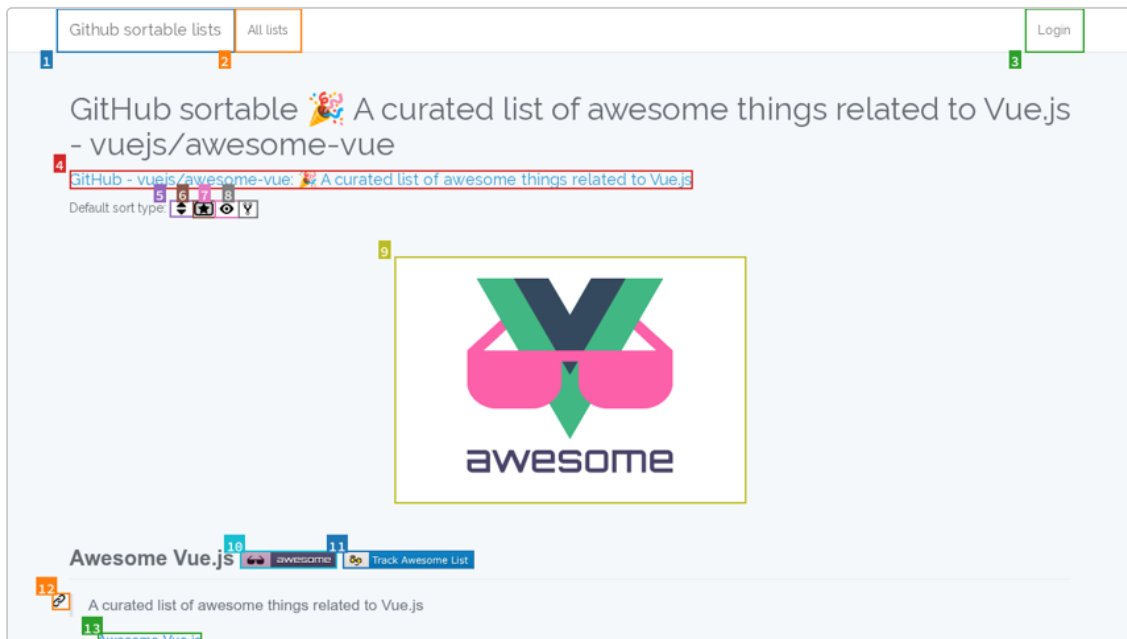

## Response:

To compare two curated GitHub lists by popularity, I need to identify the lists and then sort them based on popularity. The current page shows a list related to Vue.js, but I need to find another list to compare it with. Let's start by exploring the available lists.

**Reasoning:**

1. The page currently displays a list related to Vue.js. I need to find another list to compare it with.
2. The "All lists" tab at the top might provide access to other curated lists.
3. Once I have access to multiple lists, I can sort them by popularity to compare.

**Action:**

I will click on the "All lists" tab to explore other curated lists.

```
```json
{
```



```
"name": "click",
"arguments": {
  "element_id": "2",
  "description": "All lists tab",
  "reasoning": "To access other curated GitHub lists for comparison."
}
}
...

```

## Step 7 (2025-10-07T14:01:19.143586)

### Screenshots:

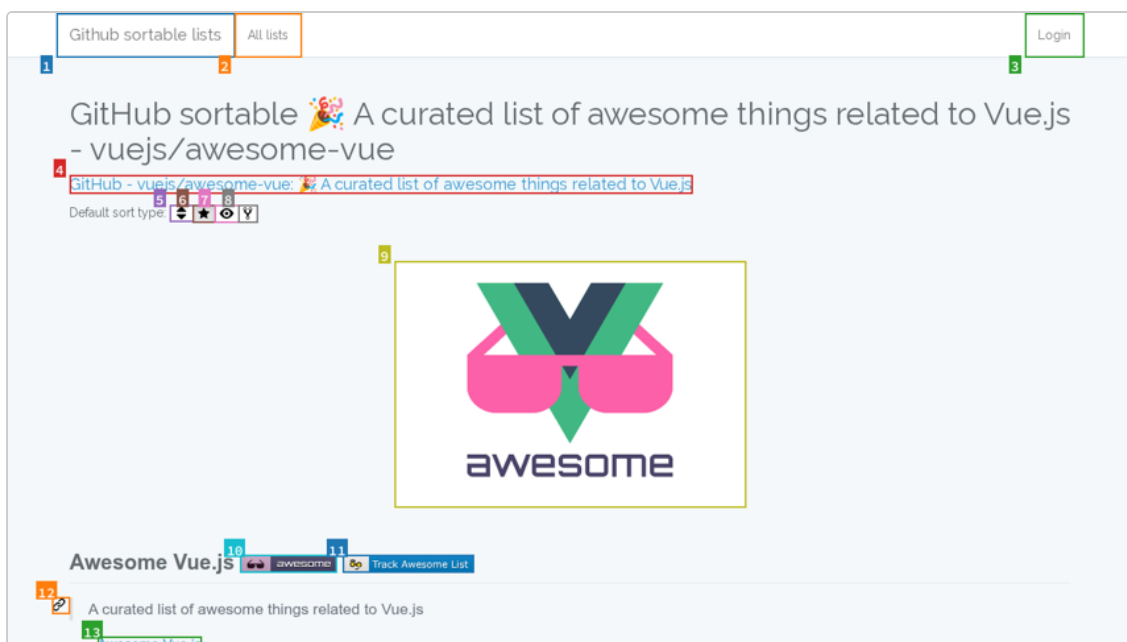

### Response:

To compare two curated GitHub lists by popularity, I need to identify and access the lists. The current page shows one list related to Vue.js. I will first click on the "All lists" tab to explore other curated lists.

**\*\*Reasoning:\*\*** By switching to the "All lists" tab, I can view a broader

range of curated lists and select another list to compare with the current one.

```
``json
{
  "name": "click",
  "arguments": {
    "element_id": "2",
    "description": "All lists tab",
    "reasoning": "To access other curated lists for comparison"
  }
}
```

## Step 8 (2025-10-07T14:01:32.505547)

### Screenshots:

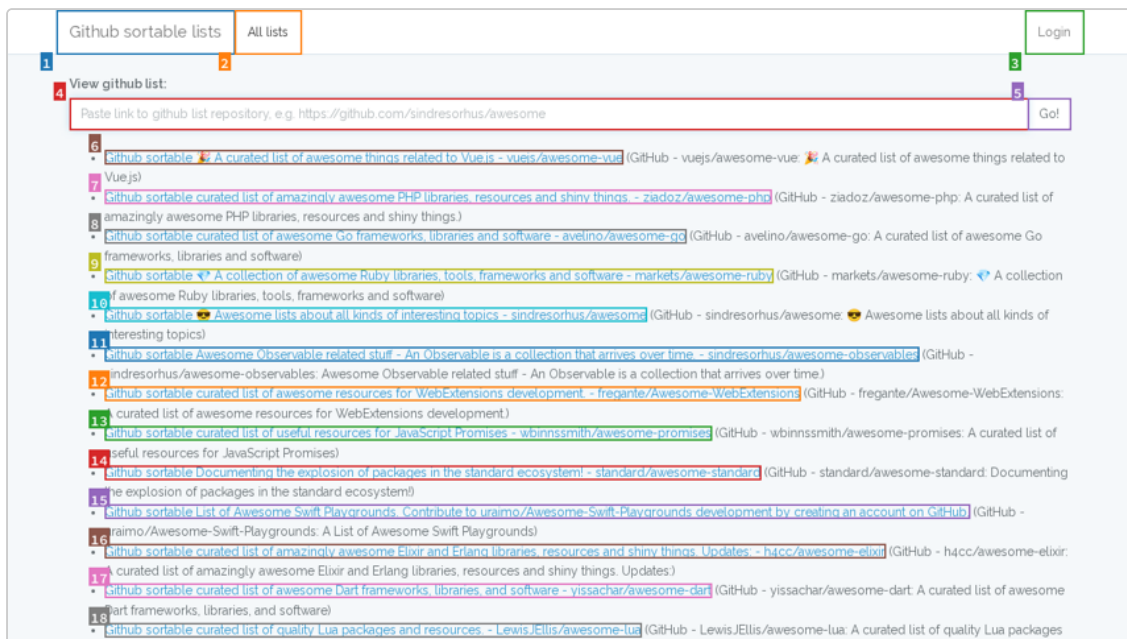

## Response:

To compare two curated GitHub lists by popularity, I need to identify two lists from the provided options and then determine their popularity metrics. Since the current page shows a list of GitHub repositories, I will select two lists and proceed to analyze their popularity.

### Reasoning:

1. **Identify Two Lists:** I will select two GitHub lists from the provided options. For this example, I will choose:
  - List 1: "Github sortable A curated list of awesome things related to Vue.js" (element\_id: 6)
  - List 2: "Github sortable A collection of awesome Ruby libraries, tools, frameworks and software" (element\_id: 9)
2. **Determine Popularity Metrics:** Popularity can be measured by factors such as the number of stars, forks, or contributors on GitHub. I will click on each list to access their respective GitHub pages and compare these metrics.

### Action:

I will start by clicking on the first list to view its details and popularity metrics.

```
```json
{
  "name": "click",
  "arguments": {
    "element_id": "6",
    "description": "Github sortable A curated list of awesome things related to Vue.js",
    "reasoning": "Clicking on this list to access its GitHub page and check its popularity metrics."
  }
}
```
```

## Screenshots:

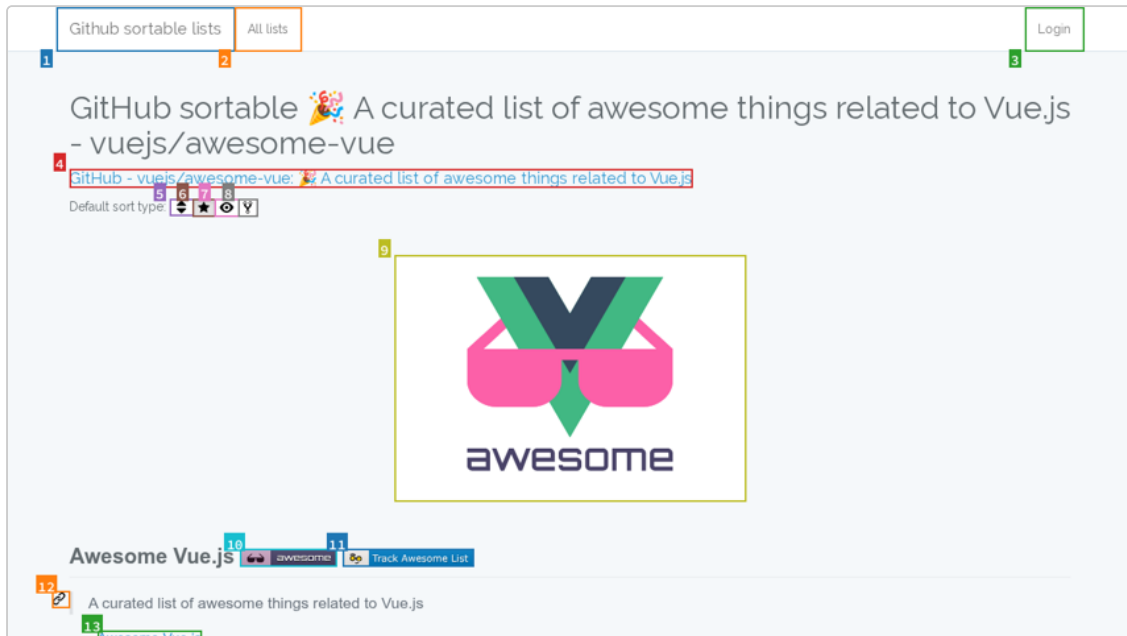

## Response:

To compare two curated GitHub lists by popularity, I need to identify the lists and check their popularity metrics, such as stars, forks, or issues. The current page shows one list, "Awesome Vue.js," with sorting options available. I should first click on the "All lists" tab to view other curated lists.

**\*\*Action:\*\***

```json

```
{
  "name": "click",
  "arguments": {
    "element_id": "2",
    "description": "All lists tab",
    "reasoning": "To view other curated lists and compare their popularity"
  }
}
```

```
}  
...  

```

## Step 10 (2025-10-07T14:02:10.497200)

### Screenshots:

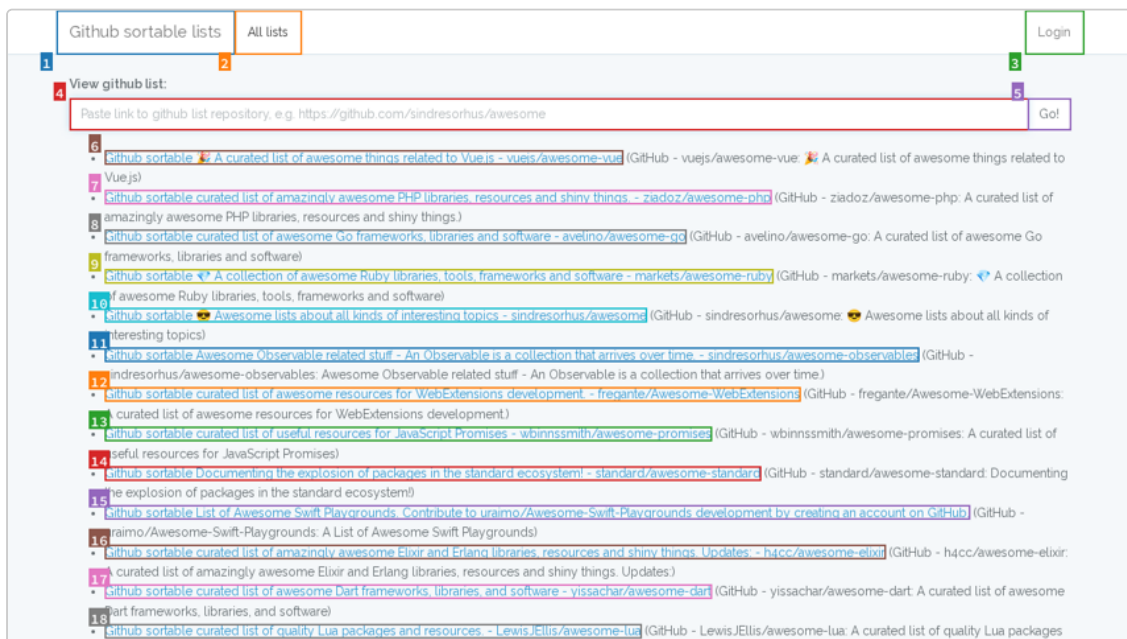

### Response:

To compare two curated GitHub lists by popularity, I need to select two lists from the provided options and analyze their popularity metrics. Since I have only one action left, I will choose two lists and provide a brief explanation of their popularity based on the available information.

Action: {"name": "click", "arguments": {"element\_id": "1", "description": "16. Github sortable 🤖 Awesome lists about all kinds of interesting topics - sindresorhus/awesome", "reasoning": "I will select this list as the first curated GitHub list for comparison."}}

Action: {"name": "click", "arguments": {"element\_id": "2", "description": "7. Github sortable curated list of amazingly awesome PHP libraries,

resources and shiny things - ziadoz/awesome-php", "reasoning": "I will select this list as the second curated GitHub list for comparison."}}}

Action: {"name": "stop", "arguments": {"answer": "The two curated GitHub lists selected for comparison are:\n1. 'Github sortable 🤖 Awesome lists about all kinds of interesting topics - sindresorhus/awesome'\n2. 'Github sortable curated list of amazingly awesome PHP libraries, resources and shiny things - ziadoz/awesome-php'\n\nPopularity comparison: Both lists are curated and likely popular within their respective domains. The first list covers a wide range of interesting topics, which might attract a broader audience. The second list focuses on PHP libraries, resources, and shiny things, which could be popular among PHP developers. To determine their exact popularity, I would need to visit their respective GitHub pages and check metrics like stars, forks, and contributors.", "reasoning": "I have selected two lists and provided a brief explanation of their potential popularity based on the available information."}}}
