# Supplementary material
Source: ML conference proceedings conference paper supplement (https://openreview.net/forum?id=cvAZKWA1HZ)
Supplement: supplementary_material [file travel_tasks_travel_V3_new_748.pdf › supplementary_materials/trajectory_evaluation/travel_tasks_travel_V3_new_748.pdf]

# Task Report

**Session ID:** travel\_tasks\_travel\_V3\_new\_748

**Task Description:** List the top 3 attractions at Lotte World Amusement Park according to the article

**Total Rounds:** 6

**Step 1** (2025-10-13T20:32:23.978153)

## Screenshots:

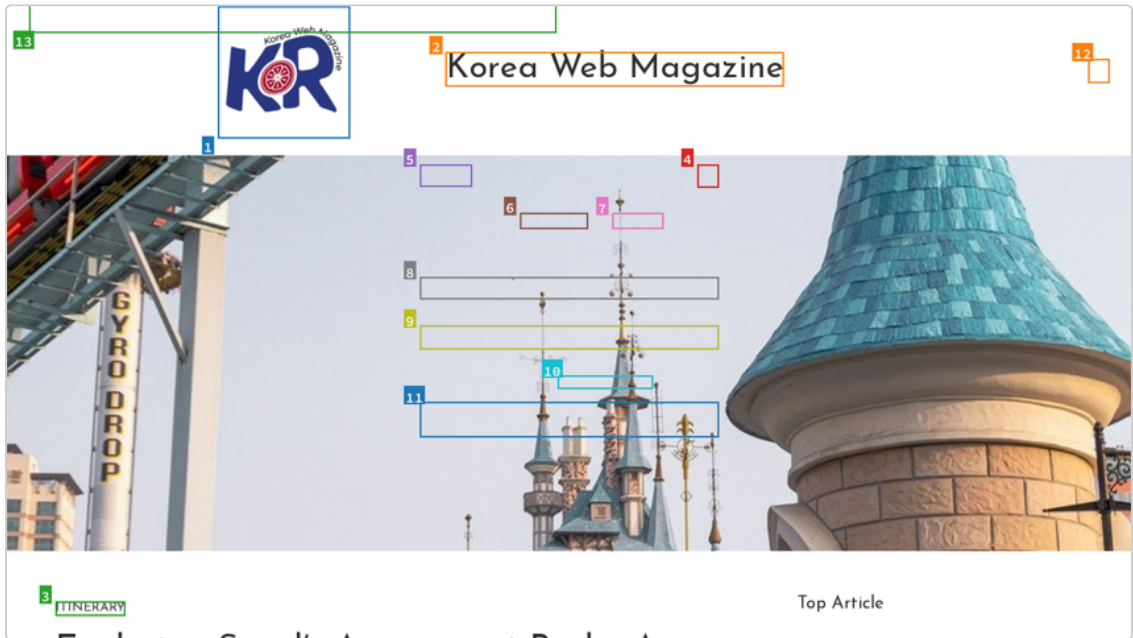

## Response:

To find the top 3 attractions at Lotte World Amusement Park, I need to interact with the webpage and locate the relevant information. Since the

current view shows an image and some interactive elements, I'll start by exploring these elements to gather more details.

### Reasoning:

The numbered boxes on the image likely correspond to different attractions or sections of the amusement park. I should click on these numbered elements to see if they provide more information about the attractions.

### Action:

I will click on one of the numbered elements to explore further details.

```
```json
{
  "name": "click",
  "arguments": {
    "element_id": "1",
    "description": "1 - Roller coaster section",
    "reasoning": "Clicking on this element may provide details about the attractions at Lotte World Amusement Park."
  }
}
```
```

**Step 2** (2025-10-13T20:32:35.382012)

## Screenshots:

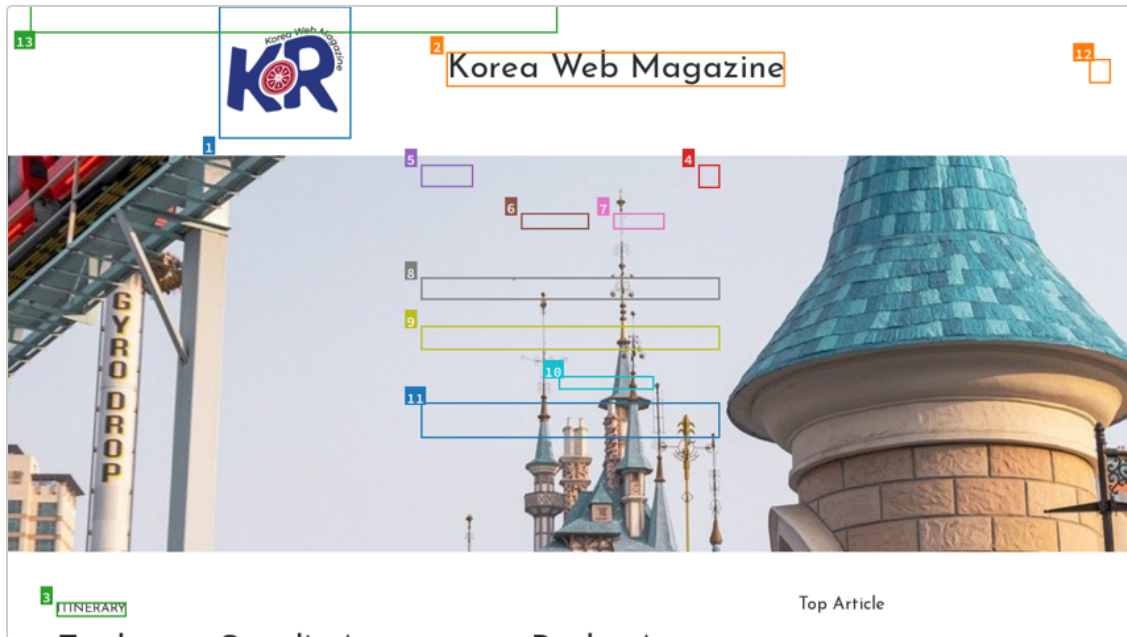

## Response:

To find the top 3 attractions at Lotte World Amusement Park, I need to explore the page further. Since the current view shows an image and some navigation elements, I will scroll down to see if there is more content related to Lotte World Amusement Park.

Action:

```
```json
```

```
{
```

```
  "name": "scroll",
```

```
  "arguments": {
```

```
    "direction": "down",
```

```
    "reasoning": "I need to scroll down to find more information about Lotte World Amusement Park attractions."
```

```
  }
```

```
}
```

```
```
```

Screenshots:

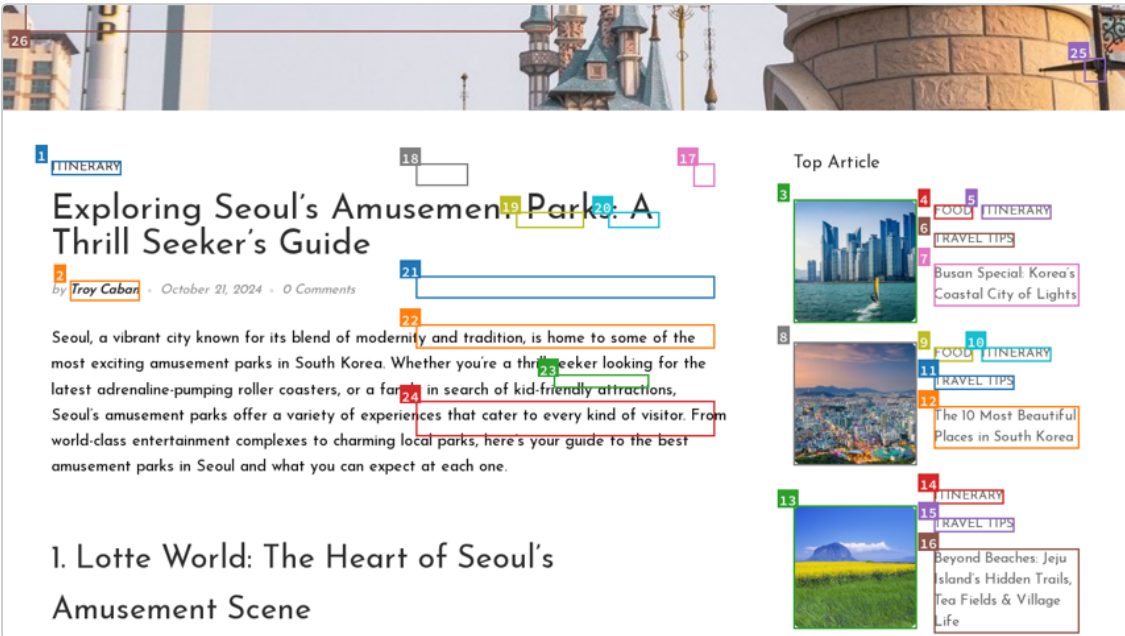

Response:

To find the top 3 attractions at Lotte World Amusement Park, I need to scroll down the page to locate more detailed information about Lotte World. The current view only introduces the topic and doesn't provide specific details about the attractions.

**\*\*Action:\*\***

```json

{

"name": "scroll",

"arguments": {

"direction": "down",

"reasoning": "I need to scroll down to find more detailed information about Lotte World's attractions."

}



```
"coords": "462 334",
"description": "17, Walk LotteWorld Adventure & MagicIsland Ride",
"reasoning": "Clicking on this label may provide details about specific
attractions at Lotte World."
}
}
...
```

## Step 5 (2025-10-13T20:33:20.891178)

### Screenshots:

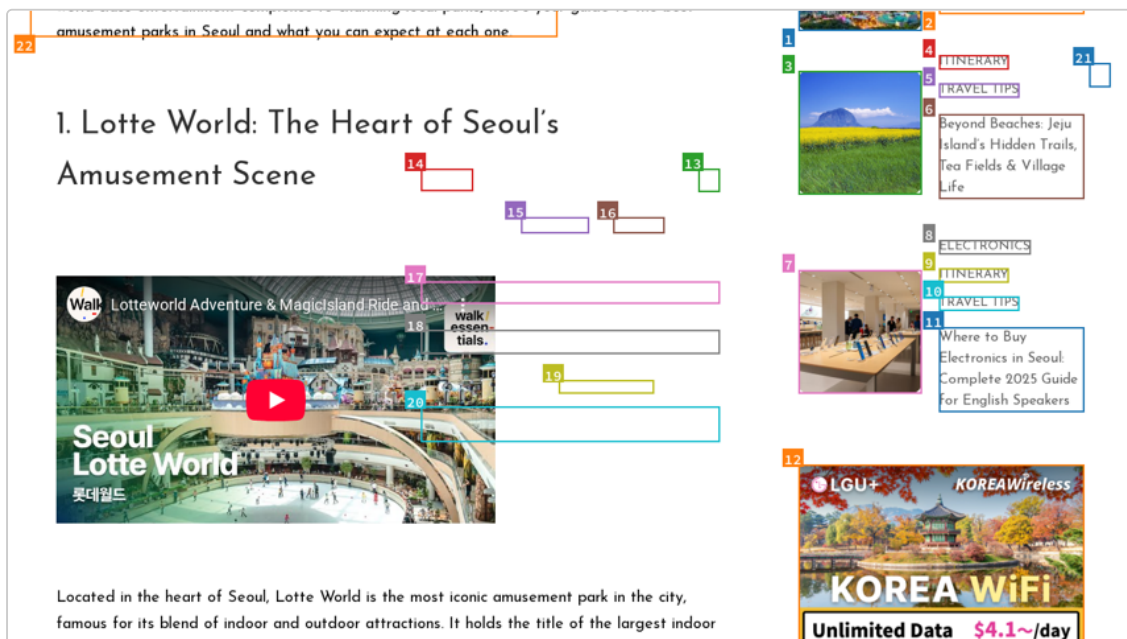

### Response:

To find the top 3 attractions at Lotte World Amusement Park, I need to explore the page further. The current view shows an introduction and a large image with numbered labels, but it doesn't list specific attractions. I should scroll down to see if more detailed information is available.

**\*\* Action:\*\***

```
```json
{
  "name": "scroll",
  "arguments": {
    "direction": "down",
    "reasoning": "I need to scroll down to find more detailed information about the top attractions at Lotte World."
  }
}
```
```

## Step 6 (2025-10-13T20:33:34.397649)

### Screenshots:



Located in the heart of Seoul, Lotte World is the most iconic amusement park in the city famous for its blend of indoor and outdoor attractions. It holds the title of the largest indoor amusement park in the world, making it a popular destination year-round, regardless of the weather. The park is divided into two main areas: Adventure, the indoor section, and Magic Island, the outdoor area situated on an artificial island in Seokchon Lake.

Must-See Attractions

Atlantis: A hybrid roller coaster and water ride that takes you on a high-speed journey with sudden drops and sharp turns.

Gyro Drop & Gyro Swing: Thrill-seekers will love these gravity-defying rides that provide heart-pounding excitement with views of the Seoul skyline.

French Revolution: A classic indoor roller coaster that twists and turns through Adventure's towering structures.

Parade and Performances: Lotte World offers daily parades with vibrant costumes, music, and



### Response:

To identify the top 3 attractions at Lotte World Amusement Park, I will analyze the "Must-See Attractions" section provided in the text. The attractions listed are:

1. Atlantis: A hybrid roller coaster and water ride.
2. Gyro Drop & Gyro Swing: Gravity-defying rides with views of the Seoul skyline.
3. French Revolution: A classic indoor roller coaster.
4. Parade and Performances: Daily parades with vibrant costumes, music, and entertainment.

Since the task asks for the top 3 attractions, I will consider the first three listed as the most prominent ones based on the provided information.

**\*\*Action:\*\***

```
```json
```

```
{
```

```
  "name": "stop",
```

```
  "arguments": {
```

```
    "answer": "The top 3 attractions at Lotte World Amusement Park are: 1) Atlantis (a hybrid roller coaster and water ride), 2) Gyro Drop & Gyro Swing (gravity-defying rides with Seoul skyline views), and 3) French Revolution (a classic indoor roller coaster).",
```

```
    "reasoning": "The 'Must-See Attractions' section lists these as the primary attractions, and they are the first three mentioned, indicating their prominence."
```

```
  }
```

```
}
```

```
```
```
